# Supplementary material for: Catalytic enantioselective intramolecular 1,3-dipolar cycloaddition of azomethine ylides with fluorinated dipolarophiles
Source: Royal Society of Chemistry journal article supplement (doi:10.1039/d2cc02902b), 2022-01-01

Supporting information for

**Catalytic Enantioselective Intramolecular 1,3-Dipolar Cycloaddition of  
Azomethine Ylides with Fluorinated Dipolarophiles**

Christian Cristobal,<sup>a</sup> Daniel Gaviña,<sup>b</sup> Inés Alonso,<sup>a,c,d</sup> María Ribagorda,<sup>a,c</sup> Juan  
C. Carretero,<sup>a,c,d</sup> Carlos del Pozo,<sup>\*b</sup> Javier Adrio<sup>\* a,c,d</sup>

<sup>a.</sup> *Departamento de Química Orgánica, Facultad de Ciencias, C/ Francisco Tomás y Valiente 7, Universidad Autónoma de Madrid, 28049 Madrid (Spain). E-mail: javier.adrio@uam.es*

<sup>b.</sup> *Departamento de Química Orgánica, Universidad de Valencia, E-46100 Burjassot, Spain. E-mail: carlos.pozo@uv.es*

<sup>c.</sup> *Institute for Advanced Research in Chemical Sciences (IAdChem), Universidad Autónoma de Madrid, 28049 Madrid (Spain)*

<sup>d.</sup> *Centro de Innovación en Química Avanzada (ORFEO-CINQA), Spain*

**Table of Contents**

|                                                                                  |     |
|----------------------------------------------------------------------------------|-----|
| 1. General methods                                                               | S2  |
| 2. Typical procedure for the synthesis of the aldehyde precursors                | S3  |
| 3. Typical procedure for the synthesis of the iminoesters                        | S4  |
| 4. Typical procedure for the asymmetric [3+2] cycloaddition of azomethine ylides | S9  |
| 5. Preparation of racemic products for HPLC analysis                             | S18 |
| 6. Stereochemical assignment                                                     | S19 |
| 7. Theoretical Calculations                                                      | S22 |
| 8. HPLC chart                                                                    | S40 |
| 9. NMR Spectra collection                                                        | S59 |

## 1. General methods

All anaerobic and moisture-sensitive manipulations were carried out in anhydrous solvents and under nitrogen. Dichloromethane, toluene, and tetrahydrofuran were dried over the PureSolv MD purification system. Melting points were taken in open-end capillary tubes. Reactions were monitored by thin-layer chromatography carried out on 0.25 mm silica gel plates (230-400 mesh). Flash column chromatographies were performed using silica gel (230-400 mesh). NMR spectra were recorded on AU-300 MHz instrument and calibrated using residual undeuterated solvent ( $\text{CDCl}_3$ ) as internal reference. MS spectra were recorded on a VG *AutoSpec* mass spectrometer. The HPLC chromatograms of the racemic and enantiomerically enriched cycloadducts are also included.  $\alpha$ -Iminoesters (**1a-j**, **6b-f**, **10**, **12**, **14** and **15**) were prepared by condensation of aminoesters hydrochlorides with the corresponding aldehydes, according to literature procedures.<sup>1</sup> The aldehydes needed for the preparation of  $\alpha$ -iminoesters (**1a-f**, **2g**, **2h**, **2j**, **6b-f** and **14**) were previously reported.<sup>2</sup> Starting imine **15** were previously described.<sup>3</sup>

## 2. Typical procedure for the synthesis of aldehyde precursors

<sup>1</sup> S. Cabrera, R. Gómez Arrayás, J. C. Carretero, *J. Am. Chem. Soc.* 2005, **127**, 16394.

<sup>2</sup> a) F. Rabasa Alcañiz, D. Hammerl, A. Sánchez-Merino, T. Tejero, P. Merino, S. Fustero, C. del Pozo, *Org. Chem. Front.* 2019, **6**, 2916; b) B. Wang, L. Huang, Y. Lou, S. Lan, J. Chen, *Org. Lett.* 2018, **20**, 6012.

<sup>3</sup> R. Stohler, F. Wahl and A. Pfaltz, *Synthesis*, 2005, 1431

### Typical procedure 1: (*E*)-3,5-Dichloro-2-((4,4,4-trifluorobut-2-en-1-yl)oxy)benzaldehyde.

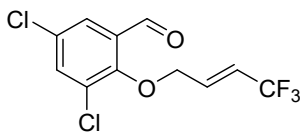

This procedure was adapted from the literature procedure.<sup>4</sup> A solution of the 4,5-dichloro-2-hydroxybenzaldehyde (148 mg, 0.78 mmol) and K<sub>2</sub>CO<sub>3</sub> (98 mg, 0.71 mmol) in dry acetonitrile (2 mL) was heated in a pressure vial at 60 °C for 10 min. A solution of (*E*)-4,4,4-trifluorobut-2-en-1-yl 4-methylbenzenesulfonate (199 mg, 0.71 mmol) in dry acetonitrile (2 mL) was added and the resulting mixture was heated at the same temperature for 16 h. Water (4 mL) was added to quench the reaction and the aqueous phase was extracted with ethyl acetate (3 x 10 mL). The combined organic phases were washed with brine (30 mL), dried over anhydrous sodium sulfate and concentrated under reduced pressure. The crude was purified by flash chromatography on silica gel to afford starting fluorinated aldehyde (254 mg, 77%, yellowish solid).

**<sup>1</sup>H NMR (300 MHz, CDCl<sub>3</sub>)** δ 10.25 (s, 1H), 7.73 (d, *J* = 2.6 Hz, 1H), 7.65 (d, *J* = 2.6 Hz, 1H), 6.66 – 6.49 (m, 1H), 6.26 – 6.08 (m, 1H), 4.75 – 4.67 (m, 2H).

**<sup>19</sup>F NMR (282 MHz, CDCl<sub>3</sub>)** δ -64.57.

**<sup>13</sup>C NMR (75 MHz, CDCl<sub>3</sub>)** δ 187.2, 155.6, 136.0, 133.7 (q, *J* = 6.5 Hz), 131.5, 131.4, 130.0, 127.5, 122.8 (q, *J* = 269.6 Hz), 120.7 (q, *J* = 34.6 Hz), 72.9.

### (*E*)-2-((4,4,4-Trifluorobut-2-en-1-yl)oxy)thiophene-3-carbaldehyde.

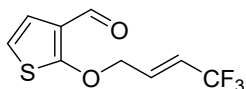

Following the typical procedure 1, the reaction of 2-hydroxythiophene-3-carbaldehyde (198 mg, 1.55 mmol) and (*E*)-4,4,4-trifluorobut-2-en-1-yl 4-methylbenzenesulfonate (392 mg, 1.40 mmol) afforded the corresponding aldehyde (276 mg, 83%, white solid).

**<sup>1</sup>H NMR (300 MHz, CDCl<sub>3</sub>)** δ 10.05 (d, *J* = 1.2 Hz, 1H), 7.66 (dd, *J* = 5.4, 1.2 Hz, 1H), 6.82 (d, *J* = 5.5 Hz, 1H), 6.62 – 6.48 (m, 1H), 6.14 – 5.97 (m, 1H), 4.88 – 4.76 (m, 2H).

**<sup>19</sup>F NMR (282 MHz, CDCl<sub>3</sub>)** δ -64.58.

**<sup>13</sup>C NMR (75 MHz, CDCl<sub>3</sub>)** δ 181.04, 162.68, 135.41, 133.81 (q, *J* = 6.4 Hz), 122.55, 122.68 (d, *J* = 269.5 Hz), 120.53 (q, *J* = 34.7 Hz), 116.22, 69.10.

### 2-((2-(Trifluoromethyl)allyl)oxy)benzaldehyde.

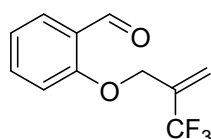

Following the typical procedure 1, the reaction of salicylaldehyde (95.1 mg, 0.78 mmol) and 2-(trifluoromethyl)allyl 4-methylbenzenesulfonate<sup>5</sup> (199 mg, 0.71 mmol) afforded the corresponding aldehyde (64 mg, 39%, light yellow oil).

**<sup>1</sup>H NMR (300 MHz, CDCl<sub>3</sub>)** δ 10.52 (d, *J* = 0.7 Hz, 1H), 7.87 (dd, *J* = 7.7, 1.8 Hz, 1H), 7.57 (ddd, *J* = 8.4, 7.4, 1.9 Hz, 1H), 7.17 – 7.06 (m, 1H), 6.97 (d, *J* = 8.4 Hz, 1H), 6.00 (q, *J* = 1.3 Hz, 1H), 5.86 (q, *J* = 1.4 Hz, 1H), 4.79 (s, 2H).

**<sup>19</sup>F NMR (282 MHz, CDCl<sub>3</sub>)** δ -67.42 (s, 3F).

**<sup>13</sup>C NMR (75 MHz, CDCl<sub>3</sub>)** δ 189.4, 160.1, 136.1, 132.1 (q, *J* = 282.4 Hz, CF<sub>3</sub>), 129.1, 128.0, 125.4, 121.9, 121.3 (q, *J* = 5.4 Hz), 112.6, 65.1 (q, *J* = 1.4 Hz).

## 3. Typical procedure for the synthesis of iminoesters

<sup>4</sup> E. Forcellini, R. Hemelaere, J. Desroches, J.-F. Paquin, *J. Fluorine Chem.* 2015, **180**, 216.

<sup>5</sup> V. De Matteis, F. L. van Delft, H. Jakobi, S. Lindell, J. Tiebes, F. P. J. T Rutjes, *J. Org. Chem.* 2006, **71**, 7527.

## Typical procedure 2: Methyl 2-(2-((E)-4,4,4-trifluorobut-2-en-1-yloxy)benzylideneamino)acetate (1a)

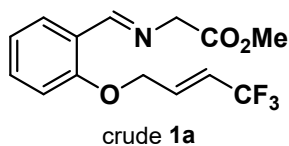

To a suspension of 2-((E)-4,4,4-trifluorobut-2-en-1-yloxy)benzaldehyde (40 mg, 0.17 mmol), glycine methyl ester hydrochloride (43 mg, 0.34 mmol) and anhydrous MgSO<sub>4</sub> (excess) in dry dichloromethane (4.0 mL), Et<sub>3</sub>N (48 μL, 0.34 mmol) was added. The mixture was stirred at room temperature for 12 hours and water (10 mL) was added. The organic layer was separated and the aqueous phase was extracted with dichloromethane (10mL). The combined organic layers were dried over MgSO<sub>4</sub>, and evaporated under reduced pressure to afford **1a** (44.5 mg, 87%, yellow oil), which was used without further purification in the next reaction step.

**<sup>1</sup>H-NMR (300 MHz, CDCl<sub>3</sub>)** δ 8.74 (s, 1H), 8.03 (dd, *J* = 7.7, 1.8 Hz, 1H), 7.41 (td, *J* = 7.6, 2.1 Hz, 1H), 7.05 (td, *J* = 7.5, 1.1 Hz, 1H), 6.86 (dd, *J* = 8.0, 0.9 Hz, 1H), 6.66 – 6.53 (m, 1H), 6.12 – 5.97 (m, 1H), 4.76 – 4.69 (m, 2H), 4.45 (d, *J* = 1.3 Hz, 2H), 3.78 (s, 3H).

## Methyl 2-(5-methyl-2-((E)-4,4,4-trifluorobut-2-en-1-yloxy)benzylideneamino)acetate (1b)

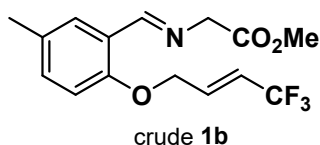

Following the typical procedure 2, the reaction of glycine methyl ester hydrochloride (50 mg, 0.40 mmol), MgSO<sub>4</sub> (excess), Et<sub>3</sub>N (56 μL, 0.40 mmol) and 5-methyl-2-((E)-4,4,4-trifluorobut-2-en-1-yloxy)benzaldehyde (50 mg, 0.20 mmol) in dichloromethane (5 mL) afforded **1b** (49 mg, 77%, colorless oil).

**<sup>1</sup>H-NMR (300 MHz, CDCl<sub>3</sub>)** δ 8.65 (s, 1H), 7.77 (d, *J* = 2.3 Hz, 1H), 7.12 (dd, *J* = 8.4, 2.4 Hz, 1H), 6.69 (d, *J* = 8.3 Hz, 1H), 6.57 – 6.44 (m, 1H), 6.05 – 5.89 (m, 1H), 4.66 – 4.53 (m, 2H), 4.37 (d, *J* = 1.4 Hz, 2H), 3.71 (s, 3H), 2.22 (s, 3H).

## Methyl 2-(5-methoxy-2-((E)-4,4,4-trifluorobut-2-en-1-yloxy)benzylideneamino)acetate (1c)

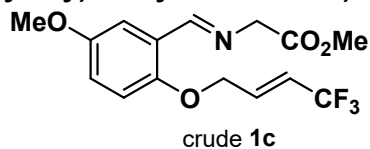

Following the typical procedure 2, the reaction of glycine methyl ester hydrochloride (48 mg, 0.38 mmol), MgSO<sub>4</sub> (excess), Et<sub>3</sub>N (53 μL, 0.38 mmol) and 5-methoxy-2-((E)-4,4,4-trifluorobut-2-en-1-yloxy)benzaldehyde (50 mg, 0.19 mmol) in dichloromethane (5 mL) afforded **1c** (60 mg, 96%, colorless oil).

**<sup>1</sup>H-NMR (300 MHz, CDCl<sub>3</sub>)** δ 8.57 (s, 1H), 7.93 (d, *J* = 8.8 Hz, 1H), 6.59 – 6.45 (m, 2H), 6.33 (d, *J* = 2.3 Hz, 1H), 6.09 – 5.91 (m, 1H), 4.65 – 4.57 (m, 2H), 4.35 (d, *J* = 1.4 Hz, 2H), 3.77 (s, 3H), 3.72 (s, 3H).

## Methyl 2-(4-methoxy-2-((E)-4,4,4-trifluorobut-2-en-1-yloxy)benzylideneamino)acetate (1d)

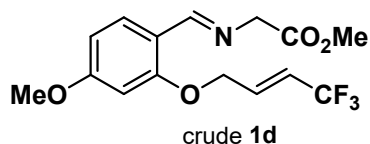

Following the typical procedure 2, the reaction of glycine methyl ester hydrochloride (95 mg, 0.76 mmol), MgSO<sub>4</sub> (excess), Et<sub>3</sub>N (106 μL, 0.76 mmol) and 4-methoxy-2-((E)-4,4,4-trifluorobut-2-en-1-yloxy)benzaldehyde (100 mg, 0.38 mmol) in dichloromethane (7 mL) afforded **1d** (117 mg, 99%, colorless oil).

**<sup>1</sup>H NMR (300 MHz, CDCl<sub>3</sub>)** δ 8.60 (s, 1H), 8.05 – 7.90 (m, 1H), 6.55 (dt, *J* = 8.8, 2.4 Hz, 2H), 6.35 (d, *J* = 2.3 Hz, 1H), 6.14 – 5.97 (m, 1H), 4.65 (s, 2H), 4.38 (s, 2H), 3.80 (s, 3H), 3.75 (s, 3H).

## Methyl 2-(3-methoxy-2-((E)-4,4,4-trifluorobut-2-en-1-yloxy)benzylideneamino)acetate (1e)

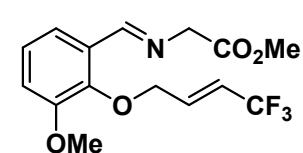

Following the typical procedure 2, the reaction of glycine methyl ester hydrochloride (48 mg, 0.38 mmol), MgSO<sub>4</sub> (excess), Et<sub>3</sub>N

(53  $\mu\text{L}$ , 0.38 mmol) and 3-methoxy-2-((*E*)-4,4,4-trifluorobut-2-en-1-yloxy)benzaldehyde (50 mg, 0.19 mmol) in dichloromethane (5 mL) afforded **1e** (58 mg, 99%, colorless oil).

**$^1\text{H NMR}$  (300 MHz,  $\text{CDCl}_3$ )**  $\delta$  8.62 (s, 1H), 7.61 (dd,  $J = 7.9, 1.5$  Hz, 1H), 7.12 (t,  $J = 8.0$  Hz, 1H), 7.01 (dd,  $J = 8.1, 1.5$  Hz, 1H), 6.61 – 6.50 (m, 1H), 6.17 – 6.00 (m, 1H), 4.68 – 4.62 (m, 2H), 4.43 (d,  $J = 1.3$  Hz, 2H), 3.87 (s, 3H), 3.77 (s, 3H).

#### Methyl 2-(5-chloro-2-((*E*)-4,4,4-trifluorobut-2-en-1-yloxy)benzylideneamino)acetate (**1f**)

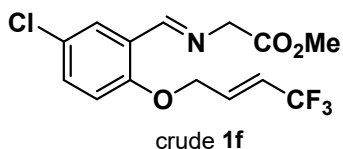

Following the typical procedure 2, the reaction of glycine methyl ester hydrochloride (48 mg, 0.38 mmol),  $\text{MgSO}_4$  (excess),  $\text{Et}_3\text{N}$  (53  $\mu\text{L}$ , 0.38 mmol) and 5-chloro-2-((*E*)-4,4,4-trifluorobut-2-en-1-yloxy)benzaldehyde (50 mg, 0.19 mmol) in dichloromethane (5 mL) afforded **1f** (51 mg, 80 %, yellow oil).

**$^1\text{H-NMR}$  (300 MHz,  $\text{CDCl}_3$ )**  $\delta$  8.60 (s, 1H), 7.94 (d,  $J = 2.7$  Hz, 1H), 7.27 (dd,  $J = 8.7, 2.9$  Hz, 1H), 6.74 (d,  $J = 8.9$  Hz, 1H), 6.57 – 6.46 (m, 1H), 6.04 – 5.89 (m, 1H), 4.70 – 4.56 (m, 2H), 4.39 (d,  $J = 1.4$  Hz, 2H), 3.73 (s, 3H).

#### Methyl 2-(3,5-dichloro-2-((*E*)-4,4,4-trifluorobut-2-en-1-yloxy)benzylideneamino)acetate (**1g**)

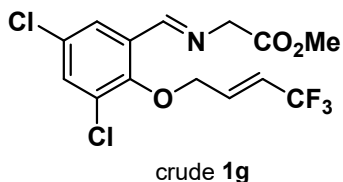

Following the typical procedure 2, the reaction of glycine methyl ester hydrochloride (125 mg, 1.00 mmol),  $\text{MgSO}_4$  (excess),  $\text{Et}_3\text{N}$  (140  $\mu\text{L}$ , 1.00 mmol) and 3,5-dichloro-2-((*E*)-4,4,4-trifluorobut-2-en-1-yloxy)benzaldehyde (150 mg, 0.50 mmol) in dichloromethane (7 mL) afforded **1g** (201 mg, 99%, yellow oil).

**$^1\text{H NMR}$  (300 MHz,  $\text{CDCl}_3$ )**  $\delta$  8.45 (s, 1H), 7.89 (d,  $J = 2.6$  Hz, 1H), 7.45 (d,  $J = 2.6$  Hz, 1H), 6.60 – 6.44 (m, 1H), 6.19 – 6.04 (m, 1H), 4.60 – 4.54 (m, 2H), 4.41 (d,  $J = 1.4$  Hz, 2H), 3.74 (s, 3H).

#### Methyl 2-(4-bromo-2-((*E*)-4,4,4-trifluorobut-2-en-1-yloxy)benzylideneamino)acetate (**1h**)

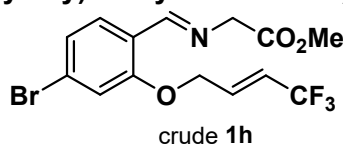

Following the typical procedure 2, the reaction of glycine methyl ester hydrochloride (40 mg, 0.32 mmol),  $\text{MgSO}_4$  (excess),  $\text{Et}_3\text{N}$  (45  $\mu\text{L}$ , 0.32 mmol) and 4-bromo-2-((*E*)-4,4,4-trifluorobut-2-en-1-yloxy)benzaldehyde (50 mg, 0.16 mmol) in dichloromethane (7 mL) afforded **1h** (48 mg, 82%, yellow oil).

**$^1\text{H NMR}$  (300 MHz,  $\text{CDCl}_3$ )**  $\delta$  8.64 (s, 1H), 7.90 (d,  $J = 8.4$  Hz, 1H), 7.18 (dd,  $J = 8.3, 1.8$  Hz, 1H), 7.02 (d,  $J = 1.8$  Hz, 1H), 6.63 – 6.51 (m, 1H), 6.12 – 5.97 (m, 1H), 4.72 – 4.66 (m, 2H), 4.43 (d,  $J = 1.4$  Hz, 2H), 3.78 (s, 3H).

#### Methyl 2-(2-((*E*)-4,4,4-trifluorobut-2-en-1-yloxy)thiophen-3-ylmethyl)eneamino)acetate (**1i**)

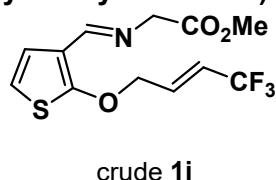

Following the typical procedure 2, the reaction of glycine methyl ester hydrochloride (107 mg, 0.85 mmol),  $\text{MgSO}_4$  (excess),  $\text{Et}_3\text{N}$  (119  $\mu\text{L}$ , 0.85 mmol) and 2-((*E*)-4,4,4-trifluorobut-2-en-1-yloxy)thiophene-3-carbaldehyde (20 mg, 0.085 mmol) in dichloromethane (5 mL) afforded **1i** (26 mg, 99%, yellow oil).

**<sup>1</sup>H NMR (300 MHz, CDCl<sub>3</sub>)** δ 8.47 (s, 1H), 7.36 (d, *J* = 5.5 Hz, 1H), 6.76 (d, *J* = 5.5 Hz, 1H), 6.60 – 6.46 (m, 1H), 6.11 – 5.94 (m, 1H), 4.77 – 4.69 (m, 2H), 4.36 (d, *J* = 1.2 Hz, 2H), 3.76 (s, 3H).

**Methyl 2-(2-(4-methyl-*N*-((*E*)-4,4,4-trifluorobut-2-en-1-yl)phenylsulfonamido)benzylideneamino)acetate (6a)**

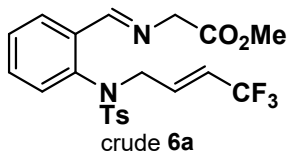

Following the typical procedure 2, the reaction of glycine methyl ester hydrochloride (65 mg, 0.52 mmol), MgSO<sub>4</sub> (excess), Et<sub>3</sub>N (73 μL, 0.52 mmol) and *N*-(2-formylphenyl)-4-methyl-*N*-((*E*)-4,4,4-trifluorobut-2-en-1-yl)benzenesulfonamide (100 mg, 0.26 mmol) in dichloromethane (5 mL) afforded **6a** (135 mg, 99%, yellow oil).

**<sup>1</sup>H NMR (300 MHz, CDCl<sub>3</sub>)** δ 8.47 (s, 1H), 8.15 (dd, *J* = 7.6, 2.0 Hz, 1H), 7.52 (d, *J* = 8.4 Hz, 2H), 7.42 – 7.32 (m, 2H), 7.29 (d, *J* = 8.1 Hz, 2H), 6.70 (dd, *J* = 7.8, 1.3 Hz, 1H), 6.36 – 6.23 (m, 1H), 5.72 – 5.58 (m, 1H), 4.44 – 4.05 (m, 4H), 3.77 (s, 3H), 2.44 (s, 3H).

**Methyl 2-(5-methyl-2-(4-methyl-*N*-((*E*)-4,4,4-trifluorobut-2-en-1-yl)phenylsulfonamido)benzylideneamino)acetate (6b)**

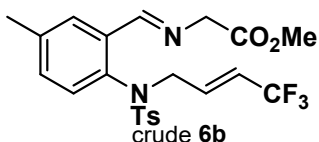

Following the typical procedure 2, the reaction of glycine methyl ester hydrochloride (19 mg, 0.15 mmol), MgSO<sub>4</sub> (excess), Et<sub>3</sub>N (21 μL, 0.15 mmol) and *N*-(2-formyl-4-methylphenyl)-4-methyl-*N*-((*E*)-4,4,4-trifluorobut-2-en-1-yl)benzenesulfonamide (30 mg, 0.075 mmol) in

dichloromethane (4 mL) afforded **6b** (42 mg, 99%, yellow oil).

**<sup>1</sup>H NMR (300 MHz, CDCl<sub>3</sub>)** δ 8.44 (s, 1H), 7.96 (d, *J* = 2.2 Hz, 1H), 7.52 (d, *J* = 8.3 Hz, 2H), 7.29 (d, *J* = 8.1 Hz, 2H), 7.14 (dd, *J* = 8.1, 2.2 Hz, 1H), 6.57 (d, *J* = 8.1 Hz, 1H), 6.36 – 6.22 (m, 1H), 5.71 – 5.58 (m, 1H), 4.45 – 3.94 (m, 4H), 3.77 (s, 3H), 2.44 (s, 3H), 2.36 (s, 3H).

**Methyl 2-(5-methoxy-2-(4-methyl-*N*-((*E*)-4,4,4-trifluorobut-2-en-1-yl)phenylsulfonamido)benzylideneamino)acetate (6c)**

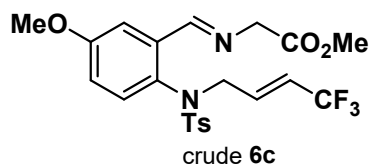

Following the typical procedure 2, the reaction of glycine methyl ester hydrochloride (18 mg, 0.15 mmol), MgSO<sub>4</sub> (excess), Et<sub>3</sub>N (20 μL, 0.15 mmol) and *N*-(2-formyl-4-methoxyphenyl)-4-methyl-*N*-((*E*)-4,4,4-trifluorobut-2-en-1-yl)benzenesulfonamide (30 mg, 0.073 mmol) in dichloromethane (4 mL) afforded **6c** (32 mg, 90%, yellow

oil).

**<sup>1</sup>H NMR (300 MHz, CDCl<sub>3</sub>)** δ 8.43 (s, 1H), 7.63 (d, *J* = 3.0 Hz, 1H), 7.52 (d, *J* = 8.3 Hz, 2H), 7.29 (d, *J* = 7.8 Hz, 2H), 6.86 (dd, *J* = 9.0, 3.3 Hz, 1H), 6.57 (d, *J* = 8.8 Hz, 1H), 6.36 – 6.22 (m, 1H), 5.74 – 5.58 (m, 1H), 4.46 – 3.98 (m, 4H), 3.85 (s, 3H), 3.77 (s, 3H), 2.44 (s, 3H).

**Methyl 2-(5-chloro-2-(4-methyl-*N*-((*E*)-4,4,4-trifluorobut-2-en-1-yl)phenylsulfonamido)benzylideneamino)acetate (6d)**

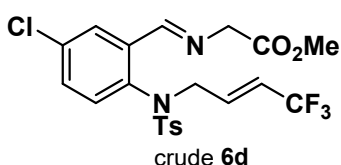

Following the typical procedure 2, the reaction of glycine methyl ester hydrochloride (18 mg, 0.14 mmol), MgSO<sub>4</sub> (excess), Et<sub>3</sub>N (20 μL, 0.15 mmol) and *N*-(2-formyl-4-chlorophenyl)-4-methyl-*N*-((*E*)-4,4,4-trifluorobut-2-en-1-yl)benzenesulfonamide (30 mg, 0.072 mmol) in

dichloromethane (4 mL) afforded **6d** (40 mg, 99%, yellow oil).

**<sup>1</sup>H NMR (300 MHz, CDCl<sub>3</sub>)** δ 8.41 (s, 1H), 8.16 (dd, *J* = 2.6, 1.0 Hz, 1H), 7.52 (d, *J* = 8.0 Hz, 2H), 7.33 – 7.27 (m, 3H), 6.62 (d, *J* = 8.5 Hz, 1H), 6.35 – 6.21 (m, 1H), 5.73 – 5.58 (m, 1H), 4.47 – 3.98 (m, 4H), 3.78 (s, 3H), 2.45 (s, 3H).

**Methyl 2-(2-(*N*-((*E*)-4,4-difluorobut-2-en-1-yl)-4-methylphenylsulfonamido)benzylideneamino)acetate (**6e**)**

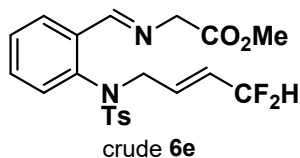

Following the typical procedure 2, the reaction of glycine methyl ester hydrochloride (14 mg, 0.11 mmol), MgSO<sub>4</sub> (excess), Et<sub>3</sub>N (16 μL, 0.11 mmol) and *N*-((*E*)-4,4-difluorobut-2-en-1-yl)-*N*-(2-formylphenyl)-4-methylbenzenesulfonamide (20 mg, 0.055 mmol) in dichloromethane (4 mL) afforded **6e** (36 mg, 99%, colorless oil).

**<sup>1</sup>H-NMR (300 MHz, CDCl<sub>3</sub>)** δ 8.53 (s, 1H), 8.14 (dd, *J* = 7.6, 1.9 Hz, 1H), 7.52 (d, *J* = 8.3 Hz, 2H), 7.43 – 7.23 (m, 4H), 6.64 (dd, *J* = 7.7, 1.5 Hz, 1H), 6.06 – 5.96 (m, 1H), 5.69 – 5.53 (m, 1H), 4.49–3.89 (m, 4H), 3.76 (s, 3H), 2.43 (s, 3H).

**Methyl 2-(2-(4-methyl-*N*-((*E*)-4,4,5,5,5-pentafluoropent-2-en-1-yl)phenylsulfonamido)benzylideneamino)acetate (**6f**)**

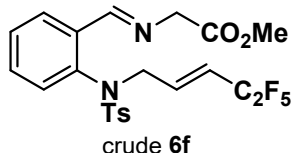

Following the typical procedure 2, the reaction of glycine methyl ester hydrochloride (18 mg, 0.14 mmol), MgSO<sub>4</sub> (excess), Et<sub>3</sub>N (20 μL, 0.14 mmol) and *N*-(2-formylphenyl)-4-methyl-*N*-((*E*)-4,4,5,5,5-pentafluoropent-2-en-1-yl)benzenesulfonamide (30 mg, 0.070 mmol) in dichloromethane (4.0 mL) afforded **6f** (34

mg, 96%, colorless oil).

**<sup>1</sup>H NMR (300 MHz, CDCl<sub>3</sub>)** δ 8.49 (s, 1H), 8.18 (dd, *J* = 7.5, 1.8 Hz, 1H), 7.55 (dd, *J* = 8.3, 1.3 Hz, 2H), 7.47 – 7.35 (m, 2H), 7.32 (dd, *J* = 8.3, 1.4 Hz, 2H), 6.71 (dd, *J* = 7.7, 1.4 Hz, 1H), 6.42 – 6.29 (m, 1H), 5.73 – 5.55 (m, 1H), 4.48 – 4.10 (m, 4H), 3.79 (s, 3H), 2.47 (s, 3H).

**Methyl 2-(2-((*E*)-4,4,4-trifluoro-3-phenylbut-2-en-1-yloxy)benzylideneamino)acetate (**10**)**

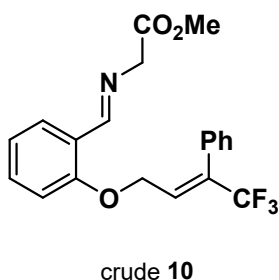

Following the typical procedure 2, the reaction of glycine methyl ester hydrochloride (25 mg, 0.20 mmol), MgSO<sub>4</sub> (excess), Et<sub>3</sub>N (28 μL, 0.20 mmol) and 2-((*E*)-4,4,4-trifluoro-3-phenylbut-2-en-1-yloxy)benzaldehyde<sup>4b</sup> (30 mg, 0.098 mmol) in dichloromethane (5 mL) afforded **10** (52 mg, 99%, yellow oil).

**<sup>1</sup>H NMR (300 MHz, CDCl<sub>3</sub>)** δ 8.53 (s, 1H), 7.85 (dd, *J* = 7.7, 1.8 Hz, 1H), 7.30 – 7.24 (m, 2H), 7.16 – 7.09 (m, 3H), 6.82 (t, *J* = 7.6 Hz, 1H), 6.55 – 6.48 (m, 2H), 4.43 – 4.37 (m, 1H), 4.28 (d, *J* = 1.4 Hz, 2H), 3.62 (s, 3H).

**Methyl**

**2-(2-(2-**

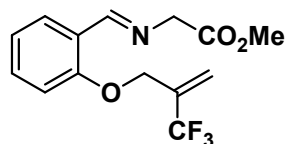

**trifluoromethylallyloxy)benzylideneamino)acetate (**12**)**

Following the typical procedure 2, the reaction of glycine methyl ester hydrochloride (33 mg, 0.26 mmol), MgSO<sub>4</sub> (excess), Et<sub>3</sub>N (36 μL, 0.26 mmol) and 2-(2-trifluoromethylallyloxy)benzaldehyde (30 mg, 0.13 mmol) in dichloromethane (5 mL) afforded **12** (36 mg, 92%, yellow oil).

**<sup>1</sup>H NMR (300 MHz, CDCl<sub>3</sub>)** δ 8.72 (s, 1H), 8.03 (dd, *J* = 7.7, 1.8 Hz, 1H), 7.39 (ddd, *J* = 8.4, 7.4, 1.8 Hz, 1H), 7.03 (t, *J* = 7.5 Hz, 1H), 6.87 (dd, *J* = 8.4, 1.0 Hz, 1H), 5.95 (q, *J* = 1.0 Hz, 1H), 5.78 (q, *J* = 1.5 Hz, 1H), 4.72 (s, 2H), 4.42 (d, *J* = 1.3 Hz, 2H), 3.76 (s, 3H).

**Methyl-2-(-2-((*E*)-2-butenyloxy)benzylideneamino)acetate (14)**

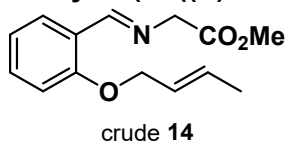

Following the typical procedure 2, the reaction of glycine methyl ester hydrochloride (33 mg, 0.26 mmol), MgSO<sub>4</sub> (excess), Et<sub>3</sub>N (36 μL, 0.26 mmol) and (*E*)-2-(butenyloxy)benzaldehyde (23 mg, 0.13 mmol) in dichloromethane (5 mL) afforded **14** (35 mg, 92%, yellow oil).

**<sup>1</sup>H NMR (300 MHz, CDCl<sub>3</sub>)** δ 8.75 (s, 1H), 8.04 – 7.97 (m, 1H), 7.41 – 7.33 (m, 1H), 7.02 – 6.86 (m, 2H), 5.93 – 5.63 (m, 2H), 4.42 (s, 2H), 3.76 (s, 3H), 1.76 (d, *J* = 6.1 Hz, 3H).

**Typical procedure 3: *N*-(pyridin-2-ylmethyl)-1-((*E*)-2-(4,4,4-trifluorobut-2-en-1-yloxy)phenyl)methanimine (16)**

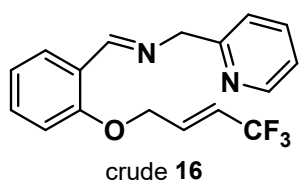

To a suspension of 2-((*E*)-4,4,4-trifluorobut-2-en-1-yloxy)benzaldehyde (10 mg, 0.04 mmol) and MgSO<sub>4</sub> in anhydrous dichloromethane (3 mL), 2-Picolylamine (8 μL, 0.078 mmol) (5 μL, 0.04 mmol) was added. The mixture was stirred at room temperature for 12 h and filtered to remove the MgSO<sub>4</sub>. The solvent was

evaporated under reduced pressure to afford **16** (12.6 mg, 98%, yellow oil), which is used without purification in the next step.

**<sup>1</sup>H NMR (300 MHz, CDCl<sub>3</sub>)** δ 8.91 (s, 1H), 8.58 (d, *J* = 5.6 Hz, 1H), 8.07 (dd, *J* = 7.7, 1.8 Hz, 1H), 7.68 (td, *J* = 7.7, 1.8 Hz, 1H), 7.45 – 7.36 (m, 2H), 7.18 (dd, *J* = 7.3, 4.9 Hz, 1H), 7.07 – 7.01 (m, 1H), 6.87 (d, *J* = 8.3 Hz, 1H), 6.64 – 6.52 (m, 1H), 6.12 – 5.97 (m, 1H), 4.99 (s, 2H), 4.73 (s, 2H).

**Typical procedure 4: 4-methyl-*N*-(2-(pyridin-2-ylmethyl)iminomethylphenyl)-*N*-((*E*)-4,4,4-trifluorobut-2-en-1-yl)benzenesulfonamide (18)**

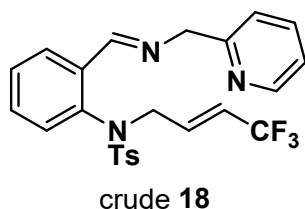

To a suspension of *N*-(2-formylphenyl)-4-methyl-*N*-((*E*)-4,4,4-trifluorobut-2-en-1-yl)benzenesulfonamide (30 mg, 0.078 mmol), and molecular sieves 4 Å, in dichloromethane (5 mL), 2-Picolylamine (8 μL, 0.078 mmol) was added. The mixture was stirred at room temperature for 12 h and filtered to remove de sieves. The solvent was evaporated under reduced pressure to afford **18** (49 mg, 99%, yellow oil), which was used without further purification in the next reaction step.

**<sup>1</sup>H NMR (300 MHz, CDCl<sub>3</sub>)** δ 8.57 (s, 1H), 8.19 (dd, *J* = 7.5, 2.0 Hz, 1H), 7.69 – 7.61 (m, 1H), 7.57 – 7.50 (m, 2H), 7.44 – 7.28 (m, 4H), 7.23 – 7.12 (m, 3H), 6.77 (dd, *J* = 7.6, 1.6 Hz, 1H), 6.41 – 6.24 (m, 1H), 5.70 – 5.60 (m, 1H), 4.87 (s, 2H), 4.19 (s, 2H), 2.40 (s, 3H).



**4. Typical procedure for the asymmetric [3+2] cycloaddition of azomethine ylides**  
**Typical Procedure 5: Methyl (2*R*,3*R*,3*aR*,9*bS*)-3-trifluoromethyl-1,2,3,3*a*,4,9*b*-hexahydrochromeno[4,3-*b*]pyrrole-2-carboxylate (**2a**)**

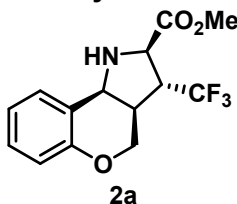

To a suspension of  $[\text{Cu}(\text{CH}_3\text{CN})_4]\text{PF}_6$  (2.5 mg,  $6.7 \cdot 10^{-3}$  mmol), (*R*)-Segphos (**3**, 4.5 mg,  $7.4 \cdot 10^{-3}$  mmol) and **1a** (20 mg, 0.067 mmol) in anhydrous dichloromethane (4 mL) under argon atmosphere, a solution of  $\text{KO}^t\text{Bu}$  (20  $\mu\text{L}$ , 0.020 mmol, 1 M in THF) was added. The resulting mixture was stirred at room temperature for 12 h, filtered over celite® and the solvent was removed under reduced pressure. The crude mixture was purified by flash chromatography, (heptane:AcOEt 4:1) to afford **2a** (16 mg, 80%, white solid).

**M.p.:** 103-105°C.

$[\alpha]_D^{25}$ : +49.5 ( $c = 1.0$ ,  $\text{CH}_2\text{Cl}_2$ ), 93% *ee*.

**HPLC:** Chiralpak IB, hexane/  $i$ PrOH 97/3 in 40 min, flow rate 1 mL/min ( $\lambda = 210$  nm),  $t_R$ : 11.43 min (2*R*,3*R*,3*aR*,9*bS*)-**2a** and 15.21 min (2*S*,3*S*,3*aS*,9*bR*)-**2a**.

**$^1\text{H-NMR}$  (300 MHz,  $\text{CDCl}_3$ )**  $\delta$  7.31 (dd,  $J = 7.6, 1.7$  Hz, 1H), 7.20 (td,  $J = 7.5, 1.7$  Hz, 1H), 6.96 (td,  $J = 7.5, 1.2$  Hz, 1H), 6.89 (dd,  $J = 8.2, 1.3$  Hz, 1H), 4.28 (d,  $J = 6.3$  Hz, 1H), 4.16 (dd,  $J = 11.1, 4.5$  Hz, 1H), 3.97 (d,  $J = 5.9$  Hz, 1H), 3.78 (t,  $J = 9.5$  Hz, 1H), 3.67 (s, 3H), 2.96 – 2.81 (m, 1H), 2.77 – 2.68 (m, 1H).

**$^{13}\text{C NMR}$  (75 MHz,  $\text{CDCl}_3$ )**  $\delta$  172.0, 154.6, 130.3, 129.2, 126.9 (q,  $J = 277.9$  Hz,  $\text{CF}_3$ ), 121.4, 121.4, 117.2, 64.5, 59.6 (d,  $J = 2.6$  Hz), 55.9, 52.8, 49.4 (q,  $J = 27.3$  Hz), 38.6.

**Coupled  $^{19}\text{F NMR}$  (471 MHz,  $\text{CDCl}_3$ )**  $\delta$  -69.6 (d,  $J = 9.4$  Hz).

**HRMS (ESI+):** Calculated for  $\text{C}_{14}\text{H}_{15}\text{F}_3\text{NO}_3$ , 302.0999; found, 302.0992.

**Methyl (2*R*,3*R*,3*aR*,9*bS*)-8-methyl-3-trifluoromethyl-1,2,3,3*a*,4,9*b*-hexahydrochromeno[4,3-*b*]pyrrole-2-carboxylate (**2b**)**

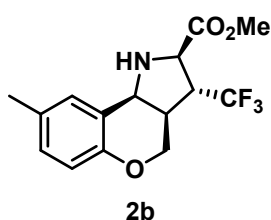

Following the typical procedure 5, the reaction of  $\text{Cu}(\text{CH}_3\text{CN})_4\text{PF}_6$  (5.6 mg, 0.015 mmol), (*R*)-Segphos (**3**, 10.4 mg, 0.017 mmol), **1b** (49 mg, 0.15 mmol) and  $\text{KO}^t\text{Bu}$  (46  $\mu\text{L}$ , 0.046 mmol) in dichloromethane (5 mL) afforded, after purification by silica gel flash chromatography (heptane-AcOEt 6:1) the cycloadduct **2b** (37 mg, 75%, white solid).

**M.p.:** 170-172°C.

$[\alpha]_D^{25}$ : +51.0 ( $c = 0.45$ ,  $\text{CH}_2\text{Cl}_2$ ), 99% *ee*.

**SFC:** Chiralpak IC,  $\text{CO}_2/\text{MeOH}$  from 95/5 to 60/40 in 8 min, flow rate 3 mL/min ( $\lambda = 280$  nm)  $t_R$ : 1.58 min (2*S*,3*S*,3*aS*,9*bR*)-**2b** and 1.74 min (2*R*,3*R*,3*aR*,9*bS*)-**2b**.

**$^1\text{H-NMR}$  (300 MHz,  $\text{CDCl}_3$ )**  $\delta$  7.16 (s, 1H), 7.04 (d,  $J = 8.4$  Hz, 1H), 6.83 (d,  $J = 8.4$  Hz, 1H), 4.27 (d,  $J = 6.4$  Hz, 1H), 4.17 (dd,  $J = 11.2, 4.5$  Hz, 1H), 4.00 (d,  $J = 5.3$  Hz, 1H), 3.79 (d,  $J = 10.3$  Hz, 1H), 3.73 (s, 3H), 2.99 – 2.82 (m, 1H), 2.81 – 2.66 (m, 1H), 2.32 (s, 3H).

**$^{13}\text{C NMR}$  (75 MHz,  $\text{CDCl}_3$ )**  $\delta$  171.9, 152.4, 130.8, 130.5, 129.9, 126.9 (q,  $J = 277.7$  Hz,  $\text{CF}_3$ ), 120.9, 116.9, 64.6, 59.65 (d,  $J = 1.9$  Hz), 56.0, 52.8, 49.5 (q,  $J = 27.3$  Hz), 38.7, 20.5.

**Coupled  $^{19}\text{F RMN}$  (471 MHz,  $\text{CDCl}_3$ )**  $\delta$  -69.6 (d,  $J = 9.8$  Hz).

**HRMS (ESI+):** Calculated for  $\text{C}_{15}\text{H}_{17}\text{F}_3\text{NO}_2$ , 316.1161; found, 316.1173.

**Methyl (2*R*,3*R*,3*aR*,9*bS*)-8-methoxy-3-trifluoromethyl-1,2,3,3*a*,4,9*b*-hexahydrochromeno[4,3-*b*]pyrrole-2-carboxylate (**2c**)**

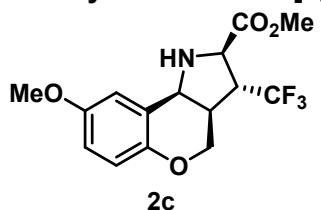

Following the typical procedure 5, the reaction of  $\text{Cu}(\text{CH}_3\text{CN})_4\text{PF}_6$  (6.7 mg, 0.018 mmol), (*R*)-Segphos (**3**, 12.2 mg, 0.020 mmol), **1c** (60 mg, 0.18 mmol) and  $\text{KO}^t\text{Bu}$  (54  $\mu\text{L}$ , 0.054 mmol) in dichloromethane (6 mL) afforded, after purification by silica gel flash chromatography (heptane-AcOEt 4:1) the cycloadduct **2c** (39 mg, 65%, brown solid).  
**M.p.:** 177-179°C.

$[\alpha]_{\text{D}}^{25}$ : -25.0 ( $c = 0.40$ ,  $\text{CH}_2\text{Cl}_2$ ), 98% ee.

**HPLC:** Chiralpak IB, hexane/*i*PrOH 97/3 in 40 min, flow rate 1 mL/min ( $\lambda = 280$  nm),  $t_{\text{R}}$ : 15.67 min (2*R*,3*R*,3*aR*,9*bS*)-**2c** and 17.50 min (2*S*,3*S*,3*aS*,9*bR*)-**2c**.

**$^1\text{H-NMR}$  (300 MHz,  $\text{CDCl}_3$ )**  $\delta$  6.88 – 6.77 (m, 3H), 4.27 (d,  $J = 6.3$  Hz, 1H), 4.14 (dd,  $J = 11.1$ , 4.5 Hz, 1H), 3.99 (d,  $J = 6.0$  Hz, 1H), 3.79 (s, 3H), 3.76 – 3.69 (m, 4H), 2.95 – 2.81 (m, 1H), 2.80 – 2.67 (m, 1H).

**$^{13}\text{C NMR}$  (75 MHz,  $\text{CDCl}_3$ )**  $\delta$  171.9, 154.1, 148.5, 126.8 (q,  $J = 278.0$  Hz,  $\text{CF}_3$ ), 121.7, 118.0, 116.2, 113.7, 64.7, 59.6, 56.3, 55.8, 52.9, 49.6 (q,  $J = 27.1$  Hz), 38.8.

**Coupled  $^{19}\text{F RMN}$  (471 MHz,  $\text{CDCl}_3$ )**  $\delta$  -69.6 (d,  $J = 9.8$  Hz).

**HRMS (ESI+):** Calculated for  $\text{C}_{15}\text{H}_{17}\text{F}_3\text{NO}_4$ , 332.1110; found, 332.1080.

**Methyl (2*R*,3*R*,3*aR*,9*bS*)-7-methoxy-3-trifluoromethyl-1,2,3,3*a*,4,9*b*-hexahydrochromeno[4,3-*b*]pyrrole-2-carboxylate (**2d**)**

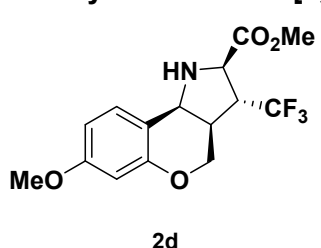

Following the typical procedure 5, the reaction of  $\text{Cu}(\text{CH}_3\text{CN})_4\text{PF}_6$  (2.2 mg,  $6.0 \cdot 10^{-3}$  mmol), (*R*)-Segphos (**3**, 4.0 mg,  $6.6 \cdot 10^{-3}$  mmol), **1d** (20 mg, 0.060 mmol) and  $\text{KO}^t\text{Bu}$  (18  $\mu\text{L}$ , 0.018 mmol) in dichloromethane (4 mL) afforded, after purification by silica gel flash chromatography (heptane-AcOEt 4:1) the cycloadduct **2d** (14 mg, 72%, brown solid).  
**M.p.:** 174-176°C.

$[\alpha]_{\text{D}}^{25}$ : +188.5 ( $c = 0.20$   $\text{CH}_2\text{Cl}_2$ ), 98% ee.

**HPLC:** Chiralpak IC, hexane/*i*PrOH 95/5 in 30 min, flow rate 1 mL/min ( $\lambda = 230$  nm),  $t_{\text{R}}$ : 11.89 min (2*S*,3*S*,3*aS*,9*bR*)-**2d** and 14.14 min (2*R*,3*R*,3*aR*,9*bS*)-**2d**.

**$^1\text{H-NMR}$  (300 MHz,  $\text{CDCl}_3$ )**  $\delta$  7.23 (d,  $J = 8.5$  Hz, 1H), 6.56 (dd,  $J = 8.6$ , 2.6 Hz, 1H), 6.42 (d,  $J = 2.5$  Hz, 1H), 4.27 (d,  $J = 6.4$  Hz, 1H), 4.14 (dd,  $J = 11.2$ , 4.5 Hz, 1H), 3.99 (d,  $J = 5.8$  Hz, 1H), 3.82 – 3.73 (m, 4H), 3.69 (s, 3H), 2.96 – 2.79 (m, 1H), 2.78 – 2.66 (m, 1H).

**$^{13}\text{C NMR}$  (75 MHz,  $\text{CDCl}_3$ )**  $\delta$  172.2, 160.5, 155.7, 131.2, 127.0 (q,  $J = 277.9$  Hz,  $\text{CF}_3$ ), 113.7, 109.0, 101.6, 64.7, 59.8 (d,  $J = 2.6$  Hz), 55.8, 55.5, 53.0, 49.5 (q,  $J = 27.5$  Hz), 38.8.

**Coupled  $^{19}\text{F NMR}$  (471 MHz,  $\text{CDCl}_3$ )**  $\delta$  -69.6 (d,  $J = 9.8$  Hz).

**HRMS (ESI+):** Calculated for  $\text{C}_{15}\text{H}_{17}\text{F}_3\text{NO}_4$ , 332.1110; found, 332.1111.

**Methyl (2*R*,3*R*,3*aR*,9*bS*)-6-methoxy-3-trifluoromethyl-1,2,3,3*a*,4,9*b*-hexahydrochromeno[4,3-*b*]pyrrole-2-carboxylate (**2e**)**

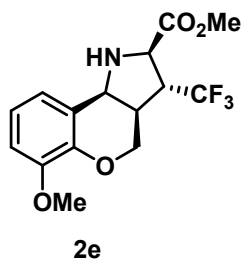

Following the typical procedure 5, the reaction of  $\text{Cu}(\text{CH}_3\text{CN})_4\text{PF}_6$  (4.5 mg, 0.012 mmol), (*R*)-Segphos (**3**, 8.1 mg, 0.013 mmol), **1e** (40 mg, 0.12 mmol) and  $\text{KO}^t\text{Bu}$  (36  $\mu\text{L}$ , 0.036 mmol) in dichloromethane (4 mL) afforded, after purification by silica gel flash chromatography (heptane-AcOEt 4:1) the cycloadduct **2e** (31 mg, 78%, white solid). **M.p.:** 179-181°C.

$[\alpha]_{\text{D}}^{25}$ : +119.3 ( $c = 0.3$   $\text{CH}_2\text{Cl}_2$ ), 86% ee.

**SFC:** Chiralpak IB,  $\text{CO}_2/\text{MeOH}$  from 95/5 to 60/40 in 8 min, flow rate 3 mL/min ( $\lambda = 280$  nm)  $t_{\text{R}}$ : 2.34 min (2*S*,3*S*,3*aS*,9*bR*)-**2e** and 2.96

min (2*R*,3*R*,3*aR*,9*bS*)-**2e**.

**$^1\text{H-NMR}$  (300 MHz,  $\text{CDCl}_3$ )**  $\delta$  6.94 – 6.90 (m, 2H), 6.82 – 6.77 (m, 1H), 4.32 – 4.21 (m, 2H), 3.97 (d,  $J = 5.9$  Hz, 1H), 3.87 (s, 3H), 3.84 (t,  $J = 10.9$  Hz, 1H), 3.67 (s, 3H), 2.97 – 2.83 (m, 1H), 2.78 – 2.68 (m, 1H).

**$^{13}\text{C NMR}$  (75 MHz,  $\text{CDCl}_3$ )**  $\delta$  172.0, 148.6, 144.2, 126.9 (q,  $J = 277.8$  Hz,  $\text{CF}_3$ ), 122.3, 121.9, 121.3, 110.9, 65.0, 59.6, 56.1, 55.9, 52.9, 49.3 (q,  $J = 27.1$  Hz), 38.6.

**Coupled  $^{19}\text{F RMN}$  (471 MHz,  $\text{CDCl}_3$ )**  $\delta$  -69.6 (d,  $J = 9.5$  Hz).

**HRMS (ESI+):** Calculated for  $\text{C}_{15}\text{H}_{17}\text{F}_3\text{NO}_4$ , 332.1110; found, 332.1069.

**Methyl (2*R*,3*R*,3*aR*,9*bS*)-8-chloro-3-trifluoromethyl-1,2,3,3*a*,4,9*b*-hexahydrochromeno[4,3-*b*]pyrrole-2-carboxylate (**2f**)**

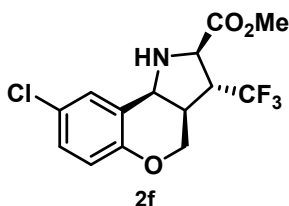

Following the typical procedure 5, the reaction of  $\text{Cu}(\text{CH}_3\text{CN})_4\text{PF}_6$  (3.4 mg,  $9.0 \cdot 10^{-3}$  mmol), (*R*)-Segphos (**3**, 6.0 mg, 0.01 mmol), **1f** (30 mg, 0.090 mmol) and  $\text{KO}^t\text{Bu}$  (27  $\mu\text{L}$ , 0.027 mmol) in dichloromethane (4 mL) afforded, after purification by silica gel flash chromatography (heptane-AcOEt 4:1) the cycloadduct **2f** (21 mg, 70%, yellow solid).

**M.p.:** 174-176°C.

$[\alpha]_{\text{D}}^{25}$ : +480.0 ( $c = 0.50$ ,  $\text{CH}_2\text{Cl}_2$ ), 97% ee.

**HPLC:** Chiralpak IB, hexane/  $i$ PrOH 98/2 in 60 min, flow rate 0.5 mL/min ( $\lambda = 280$  nm),  $t_{\text{R}}$ : 22.9 min (2*S*,3*S*,3*aS*,9*bR*)-**2f** and 38.1 min (2*R*,3*R*,3*aR*,9*bS*)-**2f**.

**$^1\text{H-NMR}$  (75 MHz,  $\text{CDCl}_3$ )**  $\delta$  7.40 – 7.27 (m, 1H), 7.15 (dd,  $J = 8.8$ , 2.6 Hz, 1H), 6.83 (d,  $J = 8.8$  Hz, 1H), 4.32 (d,  $J = 6.6$  Hz, 1H), 4.16 (dd,  $J = 11.3$ , 4.3 Hz, 1H), 4.02 (d,  $J = 5.9$  Hz, 1H), 3.84 (t,  $J = 10.1$  Hz, 1H), 3.68 (s, 3H), 3.06 – 2.89 (m, 1H), 2.81 – 2.68 (m, 1H).

**$^{13}\text{C-NMR}$  (75 MHz,  $\text{CDCl}_3$ )**  $\delta$  171.6, 153.2, 129.9, 129.4, 126.6 (q,  $J = 276.8$  Hz,  $\text{CF}_3$ ), 126.3, 122.7, 118.7, 64.6, 59.5, 55.7, 52.9, 48.8 (q,  $J = 27.7$  Hz), 38.4.

**Coupled  $^{19}\text{F NMR}$  (471 MHz,  $\text{CDCl}_3$ )**  $\delta$  -69.7 (d,  $J = 9.2$  Hz).

**HRMS (ESI+):** Calculated for  $\text{C}_{14}\text{H}_{14}\text{ClF}_3\text{NO}_3$ , 336.0609; found, 336.0609.

**Methyl (2*R*,3*R*,3*aR*,9*bS*)-6,8-dichloro-3-trifluoromethyl-1,2,3,3*a*,4,9*b*-hexahydrochromeno[4,3-*b*]pyrrole-2-carboxylate (**2g**)**

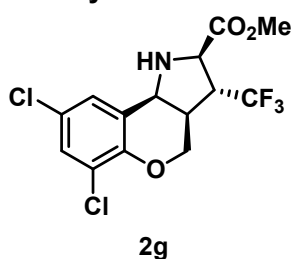

Following the typical procedure 5, the reaction of  $\text{Cu}(\text{CH}_3\text{CN})_4\text{PF}_6$  (10.1 mg, 0.027 mmol), (*R*)-Segphos (**3**, 18.3 mg, 0.030 mmol), **1g** (100 mg, 0.27 mmol) and  $\text{KO}^t\text{Bu}$  (81  $\mu\text{L}$ , 0.081 mmol) in dichloromethane (7 mL) afforded, after purification by silica gel flash chromatography (heptane-AcOEt 4:1) the cycloadduct **2g** (71 mg, 71%, yellow solid).

**M.p.:** 195-197°C.

$[\alpha]_D^{25}$ : +120.0 ( $c = 0.2$ ,  $\text{CH}_2\text{Cl}_2$ ), 99% ee.

**HPLC:** Chiralpak IB, hexane/ *i*PrOH 97/3 in 40 min, flow rate 1 mL/min ( $\lambda = 210$  nm),  $t_R$ : 11.83 min (2*S*,3*S*,3*aS*,9*bR*)-**2g** and 20.68 min (2*R*,3*R*,3*aR*,9*bS*)-**2g**.

**$^1\text{H}$  NMR (300 MHz,  $\text{CDCl}_3$ )**  $\delta$  7.28 (d,  $J = 2.4$  Hz, 1H), 7.22 (d,  $J = 2.3$  Hz, 1H), 4.31 – 4.24 (m, 2H), 3.98 (d,  $J = 5.8$  Hz, 1H), 3.88 (t,  $J = 9.7$  Hz, 1H), 3.69 (s, 3H), 3.01 – 2.86 (m, 1H), 2.79 – 2.68 (m, 1H), 2.56 (s, 1H).

**$^{13}\text{C}$  NMR (75 MHz,  $\text{CDCl}_3$ )**  $\delta$  171.8, 149.3, 129.6, 128.5, 126.7 (q,  $J = 277.7$  Hz,  $\text{CF}_3$ ), 126.1, 124.4, 123.0, 65.3, 59.6 (d,  $J = 2.5$  Hz), 55.7, 53.0, 48.9 (q,  $J = 27.6$  Hz), 38.3.

**Coupled  $^{19}\text{F}$  NMR (471 MHz,  $\text{CDCl}_3$ )**  $\delta$  -69.7 (d,  $J = 9.3$  Hz).

**HRMS (ESI+):** Calculated for  $\text{C}_{14}\text{H}_{13}\text{Cl}_2\text{F}_3\text{NO}_3$ , 370.0219; found, 370.0206.

**Methyl (2*R*,3*R*,3*aR*,9*bS*)-7-bromo-3-trifluoromethyl-1,2,3,3*a*,4,9*b*-hexahydrochromeno[4,3-*b*]pyrrole-2-carboxylate (**2h**)**

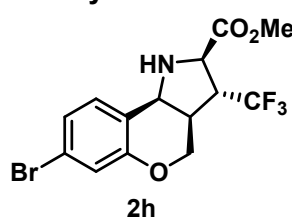

Following the typical procedure 5, the reaction of  $\text{Cu}(\text{CH}_3\text{CN})_4\text{PF}_6$  (5.2 mg, 0.014 mmol), (*R*)-Segphos (**3**, 9.2 mg, 0.015 mmol), **1h** (52 mg, 0.14 mmol) and  $\text{KO}^t\text{Bu}$  (42  $\mu\text{L}$ , 0.042 mmol) in dichloromethane (5 mL) afforded, after purification by silica gel flash chromatography (heptane-AcOEt 4:1) the cycloadduct **2h** (36 mg, 69%, white solid).

**M.p.:** 178-180°C.

$[\alpha]_D^{25}$ : +122.0 ( $c = 0.2$ ,  $\text{CH}_2\text{Cl}_2$ ), 82% ee.

**HPLC:** Chiralpak IB, hexane/ *i*PrOH 97/3 in 40 min, flow rate 1 mL/min ( $\lambda = 280$  nm),  $t_R$ : 9.30 min (2*S*,3*S*,3*aS*,9*bR*)-**2h** and 12.91 min (2*R*,3*R*,3*aR*,9*bS*)-**2h**.

**$^1\text{H}$  NMR (300 MHz,  $\text{CDCl}_3$ )**  $\delta$  7.20 – 7.14 (m, 1H), 7.09 (d,  $J = 1.8$  Hz, 1H), 7.07 (d,  $J = 1.2$  Hz, 1H), 4.22 (d,  $J = 6.3$  Hz, 1H), 4.15 (dd,  $J = 11.2, 4.5$  Hz, 1H), 3.96 (d,  $J = 5.8$  Hz, 1H), 3.77 (t,  $J = 10.1$  Hz, 1H), 3.68 (s, 3H), 2.95 – 2.80 (m, 1H), 2.75 – 2.64 (m, 1H), 2.39 (s, 1H).

**$^{13}\text{C}$  NMR (75 MHz,  $\text{CDCl}_3$ )**  $\delta$  171.9, 155.3, 131.6, 126.8 (q,  $J = 278.0$  Hz,  $\text{CF}_3$ ), 124.7, 122.2, 120.5, 120.4, 64.6, 59.5 (d,  $J = 2.8$  Hz), 55.5, 52.9, 49.2 (q,  $J = 27.3$  Hz), 38.3.

**Coupled  $^{19}\text{F}$  NMR (471 MHz,  $\text{CDCl}_3$ )**  $\delta$  -69.6 (d,  $J = 9.8$  Hz).

**HRMS (ESI+):** Calculated for  $\text{C}_{14}\text{H}_{14}\text{BrF}_3\text{NO}_3$ , 380.0104; found, 380.0087.

**Methyl (2R,3R,3aR,8bS)-3-trifluoromethyl-1,2,3,3a,4,8b-hexahydrothieno[3',2':5,6]pyrano[4,3-b]pyrrolo-2-carboxylate (2i)**

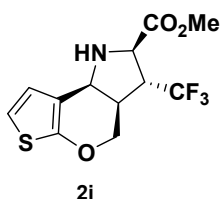

2i

Following the typical procedure 5, the reaction of  $\text{Cu}(\text{CH}_3\text{CN})_4\text{PF}_6$  (3.0 mg,  $8.1 \cdot 10^{-3}$  mmol), (*R*)-Segphos (**3**, 5.4 mg,  $8.9 \cdot 10^{-3}$  mmol), **1i** (25 mg, 0.081 mmol) and  $\text{KO}^t\text{Bu}$  (24  $\mu\text{L}$ , 0.024 mmol) in dichloromethane (5 mL) afforded, after purification by silica gel flash chromatography (heptane-AcOEt 4:1) the cycloadduct **2i** (14 mg, 57%, yellow oil).

$[\alpha]_{\text{D}}^{25}: +100.4$  ( $c = 1.4$ ,  $\text{CH}_2\text{Cl}_2$ ), 99% ee.

**HPLC:** Chiralpak IC, hexane/ $i$ PrOH 95/5 in 30 min, flow rate 1 mL/min ( $\lambda = 254$  nm),  $t_{\text{R}}$ : 9.36 min (2*S*,3*S*,3*aS*,9*bR*)-**2i** and 10.79 min (2*R*,3*R*,3*aR*,9*bS*)-**2i**.

**$^1\text{H-NMR}$  (300 MHz,  $\text{CDCl}_3$ )**  $\delta$  7.17 (d,  $J = 5.4$  Hz, 1H), 6.65 (d,  $J = 5.4$  Hz, 1H), 4.46 (s, 1H), 4.29 – 4.14 (m, 1H), 4.08 – 3.91 (m, 2H), 3.71 (s, 3H), 3.19 – 2.99 (m, 1H), 2.87 – 2.72 (m, 1H), 2.47 (s, 1H).

**$^{13}\text{C-NMR}$  (126 MHz,  $\text{CDCl}_3$ )**  $\delta$  181.0, 172.0, 153.3, 127.2 (q,  $J = 277.9$  Hz), 124.6, 118.2, 66.1, 60.5, 54.4, 52.9, 48.0 (q,  $J = 27.6$  Hz), 40.1.

**Coupled  $^{19}\text{F-NMR}$  (471 MHz,  $\text{CDCl}_3$ )**  $\delta$  -69.8 (d,  $J = 9.5$  Hz).

**HRMS (ESI+):** Calculated for  $\text{C}_{12}\text{H}_{12}\text{F}_3\text{NO}_3\text{S}$ , 307.0490; found, 307.0484.

**Methyl (2R,3S,3aR,9bS)-3-phenyl-3-trifluoromethyl-1,2,3,3a,4,9b-hexahydrochromeno[4,3-b]pyrrole-2-carboxylate (11)**

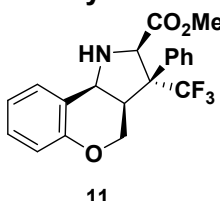

11

Following the typical procedure 5, the reaction of  $\text{Cu}(\text{CH}_3\text{CN})_4\text{PF}_6$  (2.9 mg,  $7.8 \cdot 10^{-3}$  mmol), (*R*)-Segphos (**3**, 5.2 mg,  $8.6 \cdot 10^{-3}$  mmol), **10** (29 mg, 0.078 mmol) and  $\text{KO}^t\text{Bu}$  (23  $\mu\text{L}$ , 0.023 mmol) in dichloromethane (5 mL) afforded, after purification by silica gel flash chromatography (heptane-AcOEt 4:1) the cycloadduct **11** (18 mg, 53%, white solid).

**M.p.:** 138-140°C.

$[\alpha]_{\text{D}}^{25}: +61.3$  ( $c = 0.4$ ,  $\text{CH}_2\text{Cl}_2$ ), 55% ee.

**SFC:** Chiralpak IA,  $\text{CO}_2/\text{MeOH}$  from 95/5 to 60/40 in 8 min, flow rate 3 mL/min ( $\lambda = 280$  nm)  $t_{\text{R}}$ : 2.82 min (2*S*,3*R*,3*aS*,9*bR*)-**11** and 3.18 min (2*R*,3*S*,3*aR*,9*bS*)-**11**.

**$^1\text{H-NMR}$  (300 MHz,  $\text{CDCl}_3$ )**  $\delta$  7.63 – 7.58 (m, 2H), 7.51 – 7.38 (m, 4H), 7.21 (td,  $J = 7.9$ , 1.9 Hz, 1H), 6.96 (td,  $J = 7.5$ , 1.2 Hz, 1H), 6.84 (dd,  $J = 8.2$ , 1.2 Hz, 1H), 4.89 (s, 1H), 4.53 (dd,  $J = 10.2$ , 3.9 Hz, 1H), 4.04 (d,  $J = 11.8$  Hz, 1H), 3.82 (s, 3H), 3.73 (t,  $J = 10.9$  Hz, 1H), 2.59 (td,  $J = 11.6$ , 3.8 Hz, 1H).

**$^{13}\text{C-NMR}$  (75 MHz,  $\text{CDCl}_3$ )**  $\delta$  170.2, 152.6, 132.9, 128.7 (2C), 128.6 (2C), 128.3, 127.5 (q,  $J = 2.0$  Hz), 127.0 (d,  $J = 284.6$  Hz,  $\text{CF}_3$ ), 124.7, 123.8, 120.2, 115.9, 69.6, 67.9, 62.8 (q,  $J = 28.2$  Hz), 57.5, 52.4, 49.1.

**Coupled  $^{19}\text{F-NMR}$  (471 MHz,  $\text{CDCl}_3$ )**  $\delta$  -65.2 (s).

**HRMS (ESI+):** Calculated for  $\text{C}_{20}\text{H}_{18}\text{F}_3\text{NO}_3$ , 377.1239; found, 377.1234.

**Methyl (2*R*,3*aS*,9*bR*)-3*a*-trifluoromethyl-1,2,3,3*a*,4,9*b*-hexahydrochromeno[4,3-*b*]pyrrole-2-carboxylate (**13**)**

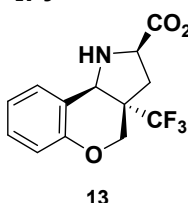

Following the typical procedure 5, the reaction of  $\text{Cu}(\text{CH}_3\text{CN})_4\text{PF}_6$  (3.7 mg,  $9.8 \cdot 10^{-3}$  mmol), (*R*)-Segphos (**3**, 6.7 mg, 0.011 mmol), **12** (29 mg, 0.098 mmol) and  $\text{KO}^t\text{Bu}$  (29  $\mu\text{L}$ , 0.029 mmol) in dichloromethane (3 mL) afforded, after purification by silica gel flash chromatography (heptane-AcOEt 5:1) the cycloadduct **13** (16 mg, 54%, brown oil).

$[\alpha]_{\text{D}}^{25} +0.259$  ( $c=0.9$ ,  $\text{CH}_2\text{Cl}_2$ ), 70% ee.

**SFC:** Chiralpak IA,  $\text{CO}_2/\text{MeOH}$  from 95/5 to 60/40 in 8 min, flow rate 3 mL/min ( $\lambda=280$  nm)  $t_{\text{R}}$ : 2.05 min (2*S*,3*aR*,9*bS*)-**13** and 3.07 min (2*R*,3*aS*,9*bR*)-**13**.

**$^1\text{H-NMR}$  (300 MHz,  $\text{CDCl}_3$ )**  $\delta$  7.38 (dd,  $J = 7.6, 1.7$  Hz, 1H), 7.26 – 7.19 (m, 1H), 6.99 (td,  $J = 7.5, 1.2$  Hz, 1H), 6.94 (dd,  $J = 8.2, 1.2$  Hz, 1H), 4.37 (dd,  $J = 12.0, 1.4$  Hz, 1H), 4.27 (s, 1H), 3.97 (t,  $J = 8.6$  Hz, 1H), 2.70 – 2.51 (m, 2H), 1.72 (dd,  $J = 14.0, 8.6$  Hz, 1H).

**$^{13}\text{C-NMR}$  (126 MHz,  $\text{CDCl}_3$ )**  $\delta$  172.7, 153.7, 130.2, 129.2, 127.2 (q,  $J = 281.5$  Hz,  $\text{CF}_3$ ), 121.8, 121.0, 117.3, 65.0, 58.3, 56.6, 52.6, 49.3 (q,  $J = 24.3$  Hz), 36.0.

**Decoupled  $^{19}\text{F NMR}$  (471 MHz,  $\text{CDCl}_3$ )**  $\delta$  -72.6 (s).

**HRMS (ESI+):** Calculated for  $\text{C}_{14}\text{H}_{15}\text{F}_3\text{NO}_3$ , 302.0999; found, 302.0988.

**(2*R*,3*R*,3*aR*,9*bS*)-2-(pyridin-2-yl)-3-trifluoromethyl-1,2,3,3*a*,4,9*b*-hexahydrochromeno[4,3-*b*]pyrrole (**17**)**

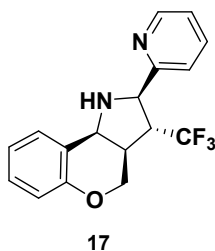

Following the typical procedure 5, the reaction of  $\text{Cu}(\text{CH}_3\text{CN})_4\text{PF}_6$  (1.5 mg,  $4.0 \cdot 10^{-3}$  mmol), (*R*)-Segphos (**3**, 2.7 mg,  $4.4 \cdot 10^{-3}$  mmol), **16** (13 mg, 0.04 mmol) and  $\text{KO}^t\text{Bu}$  (12  $\mu\text{L}$ , 0.012 mmol) in dichloromethane (3 mL) afforded, after purification by silica gel flash chromatography (heptane-AcOEt 4:1) the cycloadduct **17** (8 mg, 62%, yellow oil).

$[\alpha]_{\text{D}}^{25} +17.2$  ( $c=1.3$ ,  $\text{CH}_2\text{Cl}_2$ ), 53% ee.

**SFC:** Chiralpak IG,  $\text{CO}_2/\text{MeOH}$  from 95/5 to 60/40 in 8 min, flow rate 2 mL/min ( $\lambda=280$  nm)  $t_{\text{R}}$ : 3.21 min (2*S*,3*S*,3*aS*,9*bR*)-**17** and 4.31 min (2*R*,3*R*,3*aR*,9*bS*)-**17**.

**$^1\text{H-NMR}$  (300 MHz,  $\text{CDCl}_3$ )**  $\delta$  8.54 (d,  $J = 4.7$  Hz, 1H), 7.69 (tt,  $J = 7.4, 2.4$  Hz, 1H), 7.47 (d,  $J = 7.8$  Hz, 1H), 7.39 – 7.35 (m, 1H), 7.28 – 7.19 (m, 2H), 6.99 (td,  $J = 7.6, 1.4$  Hz, 2H), 4.49 (d,  $J = 7.0$  Hz, 1H), 4.32 (d,  $J = 6.1$  Hz, 1H), 4.26 (dd,  $J = 11.1, 5.5$  Hz, 1H), 3.94 (t,  $J = 11.6$  Hz, 1H), 2.90 – 2.76 (m, 1H), 2.75 – 2.60 (m, 1H).

**$^{13}\text{C NMR}$  (75 MHz,  $\text{CDCl}_3$ )**  $\delta$  158.2, 154.9, 149.9, 137.0, 131.1, 129.1, 127.5 (d,  $J = 278.4$  Hz,  $\text{CF}_3$ ), 123.5, 123.3, 121.4 (d,  $J = 2.6$  Hz), 117.3, 64.8, 64.0 (q,  $J = 2.4$  Hz), 56.9, 53.9 (q,  $J = 25.5$  Hz), 39.6.

**Coupled  $^{19}\text{F NMR}$  (471 MHz,  $\text{CDCl}_3$ )**  $\delta$  -68.6 (d,  $J = 9.9$  Hz).

**HRMS (ESI+):** Calculated for  $\text{C}_{17}\text{H}_{16}\text{F}_3\text{N}_2\text{O}$ , 321.1209; found, 321.1200.

**Typical procedure 6: Methyl (2*S*,3*R*,3*aS*,9*bR*)-5-tosyl-3-trifluoromethyl-2,3,3*a*,4,5,9*b*-hexahydro-1*H*-pyrrolo[3,2-*c*]quinoline-2-carboxylate (**7a**)**

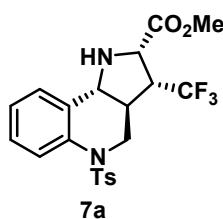

**7a**

To a suspension of  $[\text{Cu}(\text{CH}_3\text{CN})_4]\text{PF}_6$  (4.1 mg, 0.011 mmol), <sup>t</sup>Bu-Ferrocenyl-PHOX (**8**, 5.9 mg, 0.012 mmol) and **6a** (48 mg, 0.11 mmol) in anhydrous dichloromethane (4 mL), under argon atmosphere, KO<sup>t</sup>Bu (32  $\mu\text{L}$ , 0.032 mmol, 1 M in THF) was added. The resulting mixture was stirred at room temperature for 12 h, filtered over celite® and the solvent was removed under reduced pressure. The crude mixture was purified by flash chromatography, (cyclohexane:AcOEt 4:1) to afford **7a** (30 mg, 63%, yellow oil).

$[\alpha]_{\text{D}}^{25}$ : +0.316 ( $c=1.3$ ,  $\text{CH}_2\text{Cl}_2$ ), 85% ee.

**SFC**: Chiralpak IB,  $\text{CO}_2/\text{MeOH}$  from 95/5 to 70/30 in 8 min, flow rate 2 mL/min ( $\lambda=280$  nm)  $t_{\text{R}}$ : 1.48 min (2*S*,3*S*,3*aS*,9*bR*)-**7a** and 1.62 min (2*R*,3*R*,3*aR*,9*bS*)-**7a**.

**<sup>1</sup>H-NMR (300 MHz,  $\text{CDCl}_3$ )**  $\delta$  7.82 (d,  $J = 8.1$  Hz, 1H), 7.39 (d,  $J = 8.3$  Hz, 2H), 7.36 – 7.30 (m, 1H), 7.24–7.20 (m, 2H), 7.18 (d,  $J = 8.2$  Hz, 2H), 4.17 – 4.06 (m, 2H), 3.75 (s, 3H), 3.57 (t,  $J = 11.8$  Hz, 1H), 2.96 – 2.75 (m, 2H), 2.37 (s, 3H), 1.91 – 1.75 (m, 1H).

**<sup>13</sup>C NMR (75 MHz,  $\text{CDCl}_3$ )**  $\delta$  170.9, 144.2, 135.2, 134.6, 133.2, 129.9 (2C), 128.2, 127.0 (2C), 126.0, 125.9, 125.7 (q,  $J = 278.7$  Hz,  $\text{CF}_3$ ), 122.4, 60.6, 60.4, 53.0, 52.6 (q,  $J = 28.7$  Hz), 49.5, 46.2, 21.7.

**Coupled <sup>19</sup>F-RMN (471 MHz,  $\text{CDCl}_3$ )**  $\delta$  -65.6 (d,  $J=8.8$  Hz).

**HRMS (ESI+)**: Calculated for  $\text{C}_{21}\text{H}_{22}\text{F}_3\text{N}_2\text{O}_4\text{S}$ , 455.1247; found, 455.1237.

**Methyl (2*S*,3*R*,3*aS*,9*bR*)-8-methyl-5-tosyl-3-trifluoromethyl-2,3,3*a*,4,5,9*b*-hexahydro-1*H*-pyrrolo[3,2-*c*]quinoline-2-carboxylate (**7b**)**

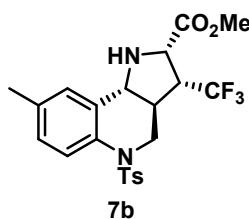

**7b**

Following the typical procedure 6, the reaction of  $\text{Cu}(\text{CH}_3\text{CN})_4\text{PF}_6$  (2.8 mg,  $7.5 \cdot 10^{-3}$  mmol), <sup>t</sup>Bu-Ferrocenyl-PHOX (**8**, 4.1 mg,  $8.2 \cdot 10^{-3}$  mmol), **16b** (35 mg, 0.075 mmol) and KO<sup>t</sup>Bu (22  $\mu\text{L}$ , 0.022 mmol) in dichloromethane (4 mL) afforded, after purification by silica gel flash chromatography (cyclohexane-AcOEt 4:1) the cycloadduct **7b** (22 mg, 63%, colorless solid).

**M.p.** 187-189°C.

$[\alpha]_{\text{D}}^{25}$ : -0.127 ( $c=1.5$ ,  $\text{CH}_2\text{Cl}_2$ ), 94% ee.

**SFC**: Chiralpak IA,  $\text{CO}_2/\text{MeOH}$  from 95/5 to 60/40 in 8 min, flow rate 3 mL/min ( $\lambda=254$  nm)  $t_{\text{R}}$ : 3.09 min (2*S*,3*S*,3*aS*,9*bR*)-**7b** and 4.38 min (2*R*,3*R*,3*aR*,9*bS*)-**7b**.

**<sup>1</sup>H-RMN (300 MHz,  $\text{CDCl}_3$ )**  $\delta$  7.72 (d,  $J = 8.3$  Hz, 1H), 7.40 (d,  $J = 8.3$  Hz, 2H), 7.23 – 7.13 (m, 3H), 7.07 – 7.01 (m, 1H), 4.19 – 4.08 (m, 2H), 3.79 (s, 3H), 3.55 (t,  $J = 11.8$  Hz, 1H), 2.95 – 2.80 (m, 1H), 2.74 (d,  $J = 11.0$  Hz, 1H), 2.40 (s, 3H), 2.38 (s, 3H), 1.89 – 1.73 (m, 1H).

**<sup>13</sup>C NMR (75 MHz,  $\text{CDCl}_3$ )**  $\delta$  170.9, 144.1, 135.9, 135.2, 133.1, 131.9, 129.8 (2C), 128.8, 127.0 (2C), 126.0, 125.7 (q,  $J = 278.6$  Hz,  $\text{CF}_3$ ), 123.0, 60.6, 60.4, 53.0, 52.6 (q,  $J = 28.7$  Hz), 49.4, 46.3, 21.7, 21.1.

**Coupled <sup>19</sup>F-RMN (471 MHz,  $\text{CDCl}_3$ )**  $\delta$  -65.6 (d,  $J = 9.1$  Hz).

**HRMS (ESI+)**: Calculated for  $\text{C}_{22}\text{H}_{24}\text{F}_3\text{N}_2\text{O}_4\text{S}$ , 469.1403; found, 469.1404.

**Methyl (2S,3R,3aS,9bR)-8-methoxy-5-tosyl-3-trifluoromethyl-2,3,3a,4,5,9b-hexahydro-1H-pyrrolo[3,2-c]quinoline-2-carboxylate (7c)**

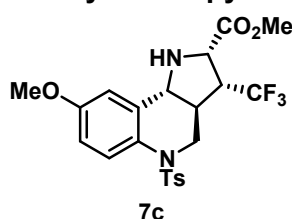

Following the typical procedure 6, the reaction of  $\text{Cu}(\text{CH}_3\text{CN})_4\text{PF}_6$  (2.4 mg,  $6.5 \cdot 10^{-3}$  mmol), *t*Bu-Ferrocenyl-PHOX (**8**, 3.6 mg,  $7.2 \cdot 10^{-3}$  mmol), **6c** (32 mg, 0.065 mmol) and  $\text{KO}^t\text{Bu}$  (20  $\mu\text{L}$ , 0.020 mmol) in dichloromethane (4 mL) afforded, after purification by silica gel flash chromatography (cyclohexane-AcOEt 4:1) the cycloadduct **7c** (18 mg, 58%, yellow oil).

$[\alpha]_D^{25}$ : +0.161 ( $c=1.3$ ,  $\text{CH}_2\text{Cl}_2$ ), 80% ee.

**SFC**: Chiralpak IC,  $\text{CO}_2/\text{MeOH}$  from 95/5 to 70/30 in 8 min, flow rate 2 mL/min ( $\lambda=254$  nm)  $t_R$ : 5.49 min (2S,3S,3aS,9bR)-**7c** and 5.69 min (2R,3R,3aR,9bS)-**7c**.

**$^1\text{H}$ -RMN (300 MHz,  $\text{CDCl}_3$ )**  $\delta$  7.73 (d,  $J = 8.9$  Hz, 1H), 7.34 (d,  $J = 8.1$  Hz, 2H), 7.18 (d,  $J = 8.1$  Hz, 2H), 6.87 (dd,  $J = 8.8, 3.0$  Hz, 1H), 6.74 (d,  $J = 3.1$  Hz, 1H), 4.16 – 4.02 (m, 2H), 3.82 (s, 3H), 3.75 (s, 3H), 3.53 (t,  $J = 11.8$  Hz, 1H), 2.89 – 2.75 (m, 1H), 2.61 (d,  $J = 10.8$  Hz, 1H), 2.38 (s, 3H), 1.84 – 1.73 (m, 1H).

**$^{13}\text{C}$  NMR (75 MHz,  $\text{CDCl}_3$ )**  $\delta$  170.8, 157.9, 144.1, 135.2, 134.9, 129.9, 128.1, 127.2, 127.0, 125.7 (q,  $J = 278.8$  Hz,  $\text{CF}_3$ ), 113.0, 108.2, 60.6, 60.4, 55.7, 53.0, 52.7 (q,  $J = 28.7$  Hz), 49.2, 46.5, 21.7.

**Coupled  $^{19}\text{F}$ -RMN (471 MHz,  $\text{CDCl}_3$ )**  $\delta$  -65.6 (d,  $J = 8.9$  Hz).

**HRMS (ESI+)**: Calculated for  $\text{C}_{22}\text{H}_{24}\text{F}_3\text{N}_2\text{O}_5\text{S}$ , 489.0857; found, 489.0847.

**Methyl (2S,3R,3aS,9bR)-8-chloro-5-tosyl-3-trifluoromethyl-2,3,3a,4,5,9b-hexahydro-1H-pyrrolo[3,2-c]quinoline-2-carboxylate (7d)**

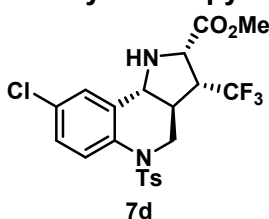

Following the typical procedure 6, the reaction of  $\text{Cu}(\text{CH}_3\text{CN})_4\text{PF}_6$  (2.7 mg,  $7.2 \cdot 10^{-3}$  mmol), *t*Bu-Ferrocenyl-PHOX (**8**, 3.9 mg,  $7.9 \cdot 10^{-3}$  mmol), **6d** (35 mg, 0.072 mmol) and  $\text{KO}^t\text{Bu}$  (22  $\mu\text{L}$ , 0.022 mmol) in dichloromethane (4 mL) afforded, after purification by silica gel flash chromatography (cyclohexane-AcOEt 4:1) the cycloadduct **7d** (18 mg, 52%, colorless solid).

**M.p.** 159-161°C

$[\alpha]_D^{25}$ : +0.102 ( $c=1.8$ ,  $\text{CH}_2\text{Cl}_2$ ), 81% ee.

**SFC**: Chiralpak IA,  $\text{CO}_2/\text{MeOH}$  from 95/5 to 60/40 in 8 min, flow rate 3 mL/min ( $\lambda=254$  nm)  $t_R$ : 3.44 min (2S,3S,3aS,9bR)-**7d** and 5.80 min (2R,3R,3aR,9bS)-**7d**.

**$^1\text{H}$ -RMN (300 MHz,  $\text{CDCl}_3$ )**  $\delta$  7.77 (d,  $J = 8.7$  Hz, 1H), 7.40 (d,  $J = 8.3$  Hz, 2H), 7.30 (dd,  $J = 8.9, 2.3$  Hz, 1H), 7.23 – 7.19 (m, 3H), 4.17 – 4.06 (m, 2H), 3.76 (s, 3H), 3.53 (t,  $J = 11.8$  Hz, 1H), 2.95 – 2.73 (m, 1H), 2.39 (s, 3H), 1.94 – 1.76 (m, 1H).

**$^{13}\text{C}$  NMR (75 MHz,  $\text{CDCl}_3$ )**  $\delta$  170.7, 144.5, 134.9, 134.8, 133.2, 131.5, 130.0 (2C), 128.2, 127.2, 127.0 (2C), 125.5 (d,  $J = 278.7$  Hz,  $\text{CF}_3$ ), 122.9, 60.4, 60.1, 53.0, 52.4 (q,  $J = 28.9$  Hz), 49.4, 45.6, 21.7.

**Coupled  $^{19}\text{F}$ -RMN (471 MHz,  $\text{CDCl}_3$ )**  $\delta$  -65.6 (d,  $J = 8.8$  Hz).

**HRMS (ESI+)**: Calculated for  $\text{C}_{21}\text{H}_{21}\text{ClF}_3\text{N}_2\text{O}_4\text{S}$ , 489.0857; found, 489.0847.



**Methyl (2*S*,3*R*,3*aS*,9*bR*)-3-difluoromethyl-5-tosyl-2,3,3*a*,4,5,9*b*-hexahydro-1*H*-pyrrolo[3,2-*c*]quinoline-2-carboxylate (**7e**)**

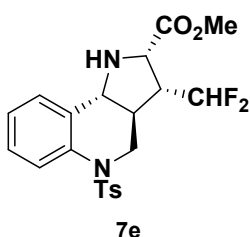

Following the typical procedure 6, the reaction of  $\text{Cu}(\text{CH}_3\text{CN})_4\text{PF}_6$  (2.1 mg,  $5.5 \cdot 10^{-3}$  mmol), *t*Bu-Ferrocenyl-PHOX (**8**, 3.0 mg,  $6.0 \cdot 10^{-3}$  mmol), **6e** (24 mg, 0.055 mmol) and KO<sup>t</sup>Bu (17  $\mu\text{L}$ , 0.017 mmol) in dichloromethane (4 mL) afforded, after purification by silica gel flash chromatography (cyclohexane-AcOEt 2:1) the cycloadduct **7e** (14 mg, 57%, yellow oil).

$[\alpha]_{\text{D}}^{25}$ : +0.293 ( $c=1.4$ ,  $\text{CH}_2\text{Cl}_2$ ), 89% ee.

**SFC**: Chiralpak IA,  $\text{CO}_2/\text{MeOH}$  from 95/5 to 60/40 in 8 min, flow rate 3 mL/min ( $\lambda=254$  nm)  $t_{\text{R}}$ : 4.04 min (2*S*,3*S*,3*aS*,9*bR*)-**7e** and 4.69 min (2*R*,3*R*,3*aR*,9*bS*)-**7e**.

**$^1\text{H}$ -RMN (300 MHz,  $\text{CDCl}_3$ )**  $\delta$  7.81 (d,  $J = 8.0$  Hz, 1H), 7.39 (d,  $J = 8.3$  Hz, 2H), 7.38 – 7.25 (m, 1H), 7.22 – 7.13 (m, 4H), 5.95 (td,  $J = 55.9, 4.2$  Hz, 1H), 4.18 – 4.05 (m, 2H), 3.75 (s, 3H), 3.54 (t,  $J = 11.8$  Hz, 1H), 2.81 (d,  $J = 11.0$  Hz, 1H), 2.69 – 2.49 (m, 1H), 2.37 (s, 3H), 2.25 (s, 1H, NH), 1.92 – 1.77 (m, 1H).

**$^{13}\text{C}$  NMR (75 MHz,  $\text{CDCl}_3$ )**  $\delta$  171.4, 144.1, 135.4, 134.7, 133.6, 129.8 (2C), 128.1, 127.0 (2C), 125.9, 125.7, 122.4, 115.6 (t,  $J = 241.1$  Hz,  $\text{CF}_2\text{H}$ ), 60.8 (t,  $J = 4.4$  Hz), 60.5, 52.9, 51.3 (t,  $J = 21.5$  Hz), 49.9, 44.8 (t,  $J = 2.7$  Hz), 21.7.

**Coupled  $^{19}\text{F}$ -RMN (471 MHz,  $\text{CDCl}_3$ )**:  $\delta$  -115.3 (ddd,  $J = 289.6, 55.5, 7.1$  Hz, 1F), -123.7 (ddd,  $J = 289.7, 56.2, 22.3$  Hz, 1F).

**HRMS (ESI+)**: Calculated for  $\text{C}_{21}\text{H}_{23}\text{F}_2\text{N}_2\text{O}_4\text{S}$ , 437.1341; found, 437.1339.

**Methyl (2*S*,3*R*,3*aS*,9*bR*)-3-perfluoroethyl-5-tosyl-2,3,3*a*,4,5,9*b*-hexahydro-1*H*-pyrrolo[3,2-*c*]quinoline-2-carboxylate (**7f**)**

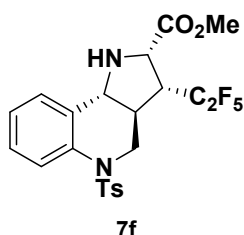

Following the typical procedure 6, the reaction of  $\text{Cu}(\text{CH}_3\text{CN})_4\text{PF}_6$  (2.5 mg,  $6.7 \cdot 10^{-3}$  mmol), *t*Bu-Ferrocenyl-PHOX (**8**, 3.7 mg,  $7.4 \cdot 10^{-3}$  mmol), **6f** (34 mg, 0.067 mmol) and KO<sup>t</sup>Bu (20  $\mu\text{L}$ , 0.020 mmol) in dichloromethane (4 mL) afforded, after purification by silica gel flash chromatography (cyclohexane-AcOEt 4:1) the cycloadduct **7f** (21 mg, 61%, yellow oil).

$[\alpha]_{\text{D}}^{25}$ : +0.221, ( $c=1.4$ ,  $\text{CH}_2\text{Cl}_2$ ) 92% ee.

**SFC**: Chiralpak IA,  $\text{CO}_2/\text{MeOH}$  from 95/5 to 60/40 in 8 min, flow rate 3 mL/min ( $\lambda=210$  nm)  $t_{\text{R}}$ : 2.61 min (2*S*,3*S*,3*aS*,9*bR*)-**7f** and 3.02 min (2*R*,3*R*,3*aR*,9*bS*)-**7f**.

**$^1\text{H}$ -RMN (300 MHz,  $\text{CDCl}_3$ )**  $\delta$  7.80 (d,  $J = 8.1$  Hz, 1H), 7.39 (d,  $J = 8.3$  Hz, 2H), 7.36 – 7.30 (m, 1H), 7.23 – 7.20 (m, 2H), 7.18 (d,  $J = 8.1$  Hz, 2H), 4.12 (dd,  $J = 11.2, 6.3$  Hz, 2H), 3.74 (s, 3H), 3.56 (t,  $J = 11.7$  Hz, 1H), 2.92 – 2.71 (m, 2H), 2.37 (s, 3H), 2.11 – 1.93 (m, 1H).

**$^{13}\text{C}$  NMR (75 MHz,  $\text{CDCl}_3$ )**  $\delta$  171.0, 144.2, 135.4, 134.4, 133.6, 129.9 (2C), 128.2, 127.0 (2C), 125.9, 125.9, 122.2, 120.8 – 115.2 (m,  $\text{C}_2\text{F}_5$ ), 61.8, 61.2, 52.8, 50.4 – 49.7 (m), 49.6, 45.6, 21.7.

**Coupled  $^{19}\text{F}$ -RMN (471 MHz,  $\text{CDCl}_3$ )**  $\delta$  -83.3 (s, 3F), -113.8 (dd,  $J = 275.7, 12.4$  Hz, 1F), -117.3 (dd,  $J = 275.8, 19.4$  Hz, 1F).

**HRMS (ESI+)**: Calculated for  $\text{C}_{22}\text{H}_{22}\text{F}_5\text{N}_2\text{O}_4\text{S}$ , 505.1215; found, 505.1215.

**(2*S*,3*R*,3*aS*,9*bR*)-2-(pyridin-2-yl)-5-tosyl-3-trifluoromethyl-2,3,3*a*,4,5,9*b*-hexahydro-1*H*-pyrrolo[3,2-*c*]quinoline (**19**)**

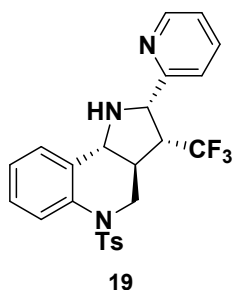

Following the typical procedure 6, the reaction of  $\text{Cu}(\text{CH}_3\text{CN})_4\text{PF}_6$  (3.7 mg, 0.010 mmol), *t*Bu-Ferrocenyl-PHOX (**8**, 5.5 mg, 0.011 mmol), **18** (49 mg, 0.10 mmol) and  $\text{KO}^t\text{Bu}$  (30  $\mu\text{L}$ , 0.030 mmol) in dichloromethane (4 mL) afforded, after purification by silica gel flash chromatography (cyclohexane-AcOEt 2:1) the cycloadduct **19** (28 mg, 56%, yellow oil).

$[\alpha]_{\text{D}}^{25}$ : +0.380 ( $c=0.5$ ,  $\text{CH}_2\text{Cl}_2$ ), 56% ee.

**SFC**: Chiralpak IA,  $\text{CO}_2/\text{MeOH}$  from 95/5 to 60/40 in 8 min, flow rate 3 mL/min ( $\lambda=210$  nm)  $t_{\text{R}}$ : 4.42 min (2*S*,3*S*,3*aS*,9*bR*)-**19** and 4.50 min (2*R*,3*R*,3*aR*,9*bS*)-**19**.

**$^1\text{H}$ -RMN (300 MHz,  $\text{CDCl}_3$ )**  $\delta$  8.47 (d,  $J = 4.3$  Hz, 1H), 7.86 (d,  $J = 8.3$  Hz, 1H), 7.65 (td,  $J = 7.7, 1.8$  Hz, 1H), 7.42 (d,  $J = 8.4$  Hz, 2H), 7.37 – 7.27 (m, 4H), 7.25 – 7.16 (m, 3H), 4.79 (d,  $J = 9.6$  Hz, 1H), 4.13 (dd,  $J = 11.8, 6.1$  Hz, 1H), 3.60 (t,  $J = 11.9$  Hz, 1H), 3.02 – 2.84 (m, 2H), 2.39 (s, 3H), 2.15 – 1.99 (m, 1H).

**$^{13}\text{C}$  NMR (75 MHz,  $\text{CDCl}_3$ )**  $\delta$  156.5, 148.7, 144.1, 136.3, 135.3, 134.8, 134.2, 129.8 (2C), 127.9, 127.0 (2C), 126.0 (q,  $J = 278.7$  Hz,  $\text{CF}_3$ ), 126.0, 125.7, 124.3, 123.2, 122.70, 63.9, 60.2, 53.6 (q,  $J = 26.9$  Hz), 49.9, 45.6, 21.7.

**Coupled  $^{19}\text{F}$ -RMN (471 MHz,  $\text{CDCl}_3$ )**  $\delta$  -63.7 (d,  $J = 9.4$  Hz).

**HRMS (ESI+)**: Calculated for  $\text{C}_{24}\text{H}_{23}\text{F}_3\text{N}_3\text{O}_2\text{S}$ , 474.1458; found, 474.1452.

#### 4. Preparation of racemic products for HPLC analysis.

The racemic pyrrolidines were prepared according to the general procedure, but using  $\text{PPh}_3$  as ligand. The samples for HPLC analysis were dissolved in isopropyl alcohol and used as quickly as possible to minimize the formation of decomposition products.

## 5. Stereochemical assignment

The relative and absolute configuration of compounds **2g** and **7b** was established by X-ray crystal structure analysis.

### X-ray structure of **2g**

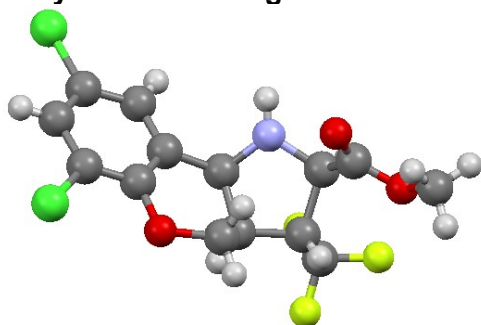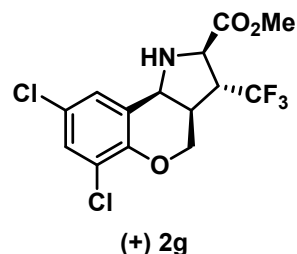

### X-ray structure of **7b**

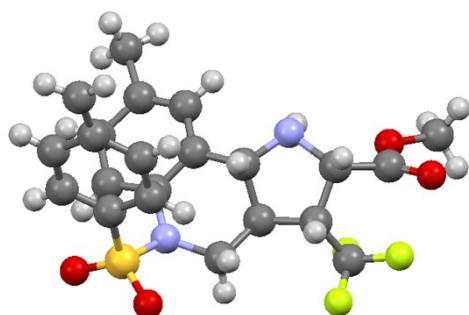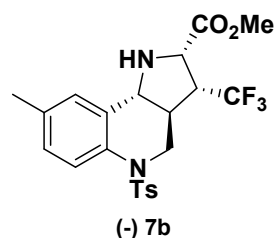

In the case of compound **7b**, four complete data sets from different crystals have been collected. In all cases the crystals are single domains of good quality and the data collected can be integrated without problems, but there is an area of the molecule with extraordinarily high disorder. It has been tried to lower the symmetry of the system to better localise the atomic positions in this area, but it has not been possible.

In order to refine this model, the  $-CF_3$  and  $-COOCH_3$  fragments have been fixed with geometrical restrictions. However only partial electron densities of these substituents have been located. The atoms C13, C14 and C15, O1, O2, F1, F2, F3 and H14A, H14B and H14C have been isotropically refined with 50% occupancy in the model positions.

## 6. NMR experiments

In addition COSY and NOESY experiments were performed on compounds **2g** and **7a**.

### Compound **2g**-COSY and NOESY spectra

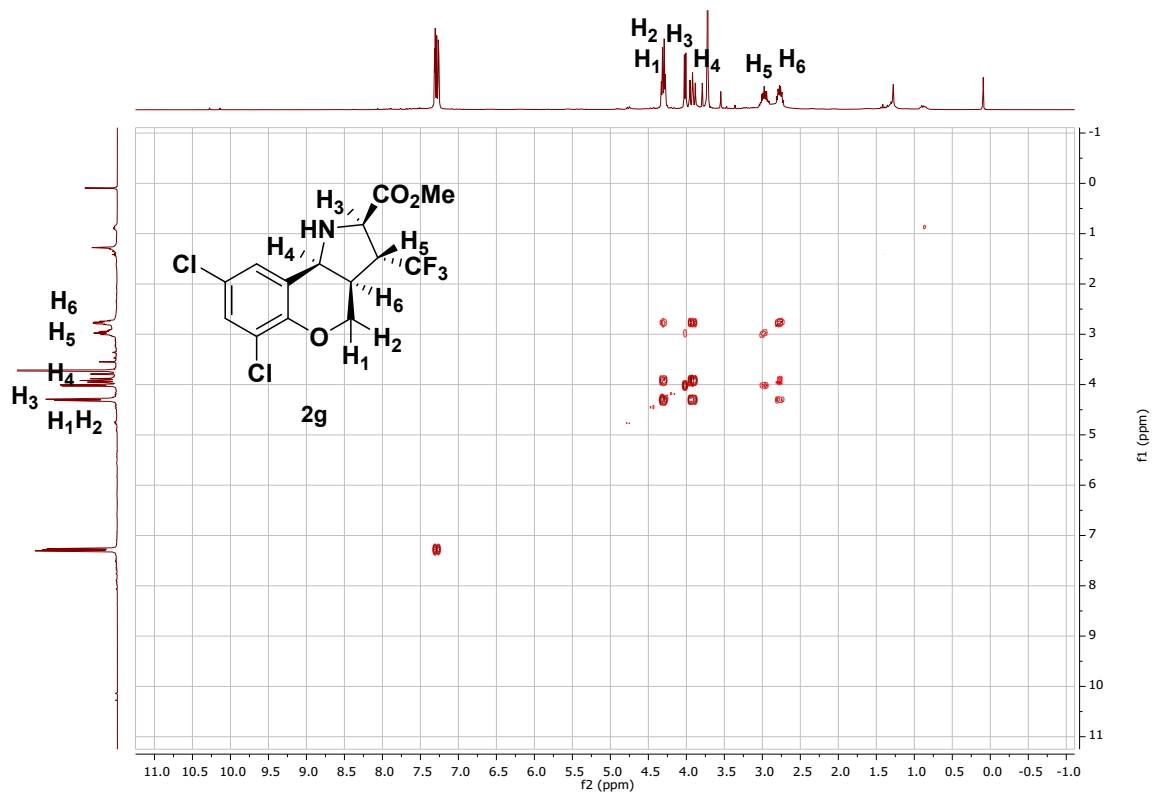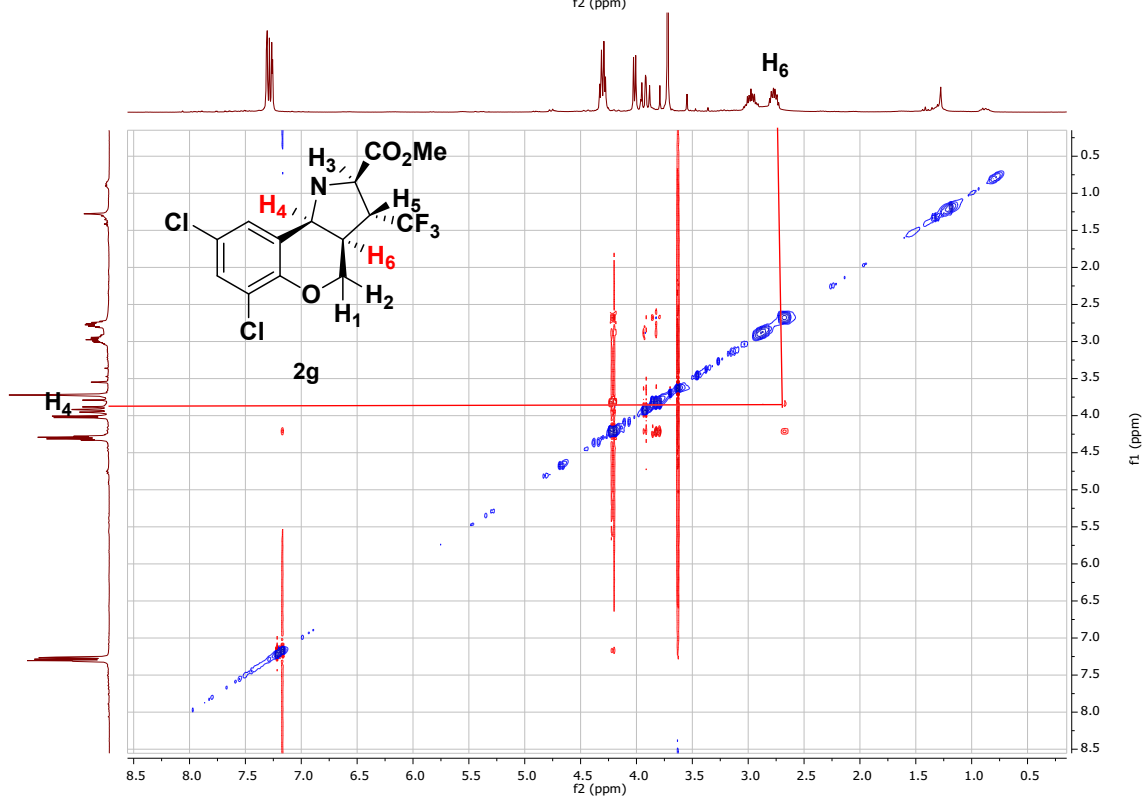

## Compound 7a-COSY and NOESY spectra

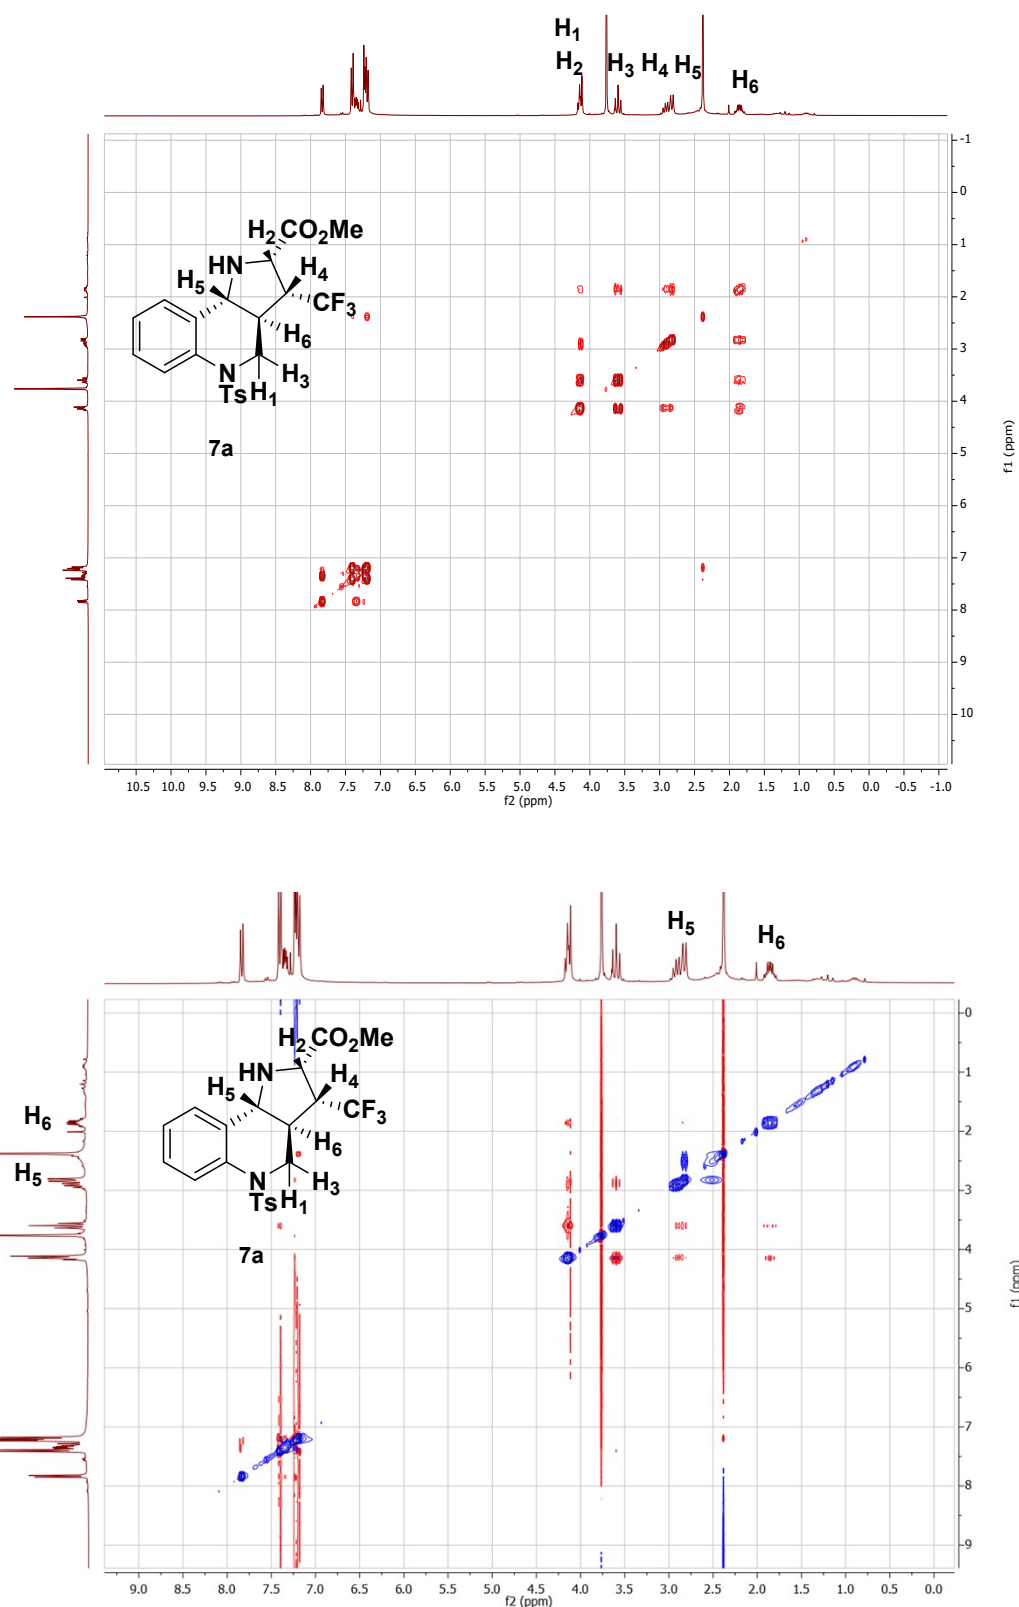

The NOESY spectrum of adduct **2g** shows a correlation between H<sub>4</sub> and H<sub>6</sub> suggesting that those protons are in *cis* configuration. This correlation was not observed in compound **7g** (protons H<sub>5</sub>-H<sub>6</sub> in *trans* relationship)

## 7. Theoretical calculations

### 1. Computational details

Theoretical calculations were performed with Gaussian 09<sup>6</sup>. Geometries were optimized using the B3LYP-D3<sup>7</sup> functional in the gas phase. A mixed basis set of LANL2DZ(f) for Cu with 6-31G(d) for all other atoms was used in geometry optimizations (basis set 1). The LANL2DZ basis set was supplemented with an f-type polarization function (exponent 3.525) for Cu.<sup>8</sup> Harmonic frequencies were calculated at the same level to characterize the stationary points and to determine the zero-point energies (ZPE). Single points were calculated with the M06 functional<sup>9</sup> and a mixed basis set of LANL2TZ(f) for Cu<sup>10</sup> with 6-311++G(d,p) for all other atoms (basis set 2). Solvation was introduced implicitly in all cases through the SMD<sup>11</sup> model, with dichloromethane as the solvent. The reported free energies include zero-point energies and thermal corrections calculated at 298 K with B3LYP-D3/BS1.

In the case of TS-endo **2a** y TS-exo **2a**, additional calculations were carried out with the B97D3 functional<sup>12</sup> in the gas phase for geometry optimization with basis set 1. In these cases single point energies were calculated with the same functional and basis set 2. Solvation was introduced implicitly in all cases through the SMD model, with dichloromethane as the solvent. The reported free energies include zero-point energies and thermal corrections calculated at 298 K with B97D3/BS1.

---

<sup>6</sup> Gaussian 09, Revision E.01, M. J. Frisch, G. W. Trucks, H. B. Schlegel, G. E. Scuseria, M. A. Robb, J. R. Cheeseman, G. Scalmani, V. Barone, B. Mennucci, G. A. Petersson, H. Nakatsuji, M. Caricato, X. Li, H. P. Hratchian, A. F. Izmaylov, J. Bloino, G. Zheng, J. L. Sonnenberg, M. Hada, M. Ehara, K. Toyota, R. Fukuda, J. Hasegawa, M. Ishida, T. Nakajima, Y. Honda, O. Kitao, H. Nakai, T. Vreven, J. A. Montgomery, Jr., J. E. Peralta, F. Ogliaro, M. Bearpark, J. J. Heyd, E. Brothers, K. N. Kudin, V. N. Staroverov, T. Keith, R. Kobayashi, J. Normand, K. Raghavachari, A. Rendell, J. C. Burant, S. S. Iyengar, J. Tomasi, M. Cossi, N. Rega, J. M. Millam, M. Klene, J. E. Knox, J. B. Cross, V. Bakken, C. Adamo, J. Jaramillo, R. Gomperts, R. E. Stratmann, O. Yazyev, A. J. Austin, R. Cammi, C. Pomelli, J. W. Ochterski, R. L. Martin, K. Morokuma, V. G. Zakrzewski, G. A. Voth, P. Salvador, J. J. Dannenberg, S. Dapprich, A. D. Daniels, O. Farkas, J. B. Foresman, J. V. Ortiz, J. Cioslowski, and D. J. Fox, Gaussian, Inc., Wallingford CT, 2013.

<sup>7</sup> a) A. D. Becke, *J. Chem. Phys.* 1993, **98**, 5648-5652. b) S. Grimme, J. Antony, S. Ehrlich, H. Krieg, *J. Chem. Phys.* 2010, **132**, 154104.

<sup>8</sup> A. W. Ehlers, M. Böhme, S. Dapprich, A. Gobbi, A. Höllwarth, V. Jonas, K. F. Köhler, R. Stegmann, A. Veldkamp, G. Frenking, *Chem. Phys. Lett.* 1993, **208**, 111-114.

<sup>9</sup> Y. Zhao and D. G. Truhlar, *Theor. Chem. Acc.* 2008, **120**, 215-241.

<sup>10</sup> a) BSE: B. P. Pritchard, D. Altarawy, B. Didier, T. D. Gibsom, T. L. Windus, *J. Chem. Inf. Model.* 2019, **59**, 4814-4820. b) P. J. Hay, W. R. Wadt, *J. Chem. Phys.* 1985, **82**, 299-310. c) L. E. Roy, P. J. Hay, R. L. Martin, *J. Chem. Theory Comput.* 2008, **4**, 1029-1031.

<sup>11</sup> S. A. V. Marenich, C. J. Cramer, D. G. Truhlar, *J. Phys. Chem. B*, 2009, **113**, 6378-6396.

<sup>12</sup> S. Grimme, S. Ehrlich and L. Goerigk, *J. Comp. Chem.* 2011, **32**, 1456-65.

**2. Model structures for the study of *endo/exo* diastereoselectivity in the formation of compound **2a**.**

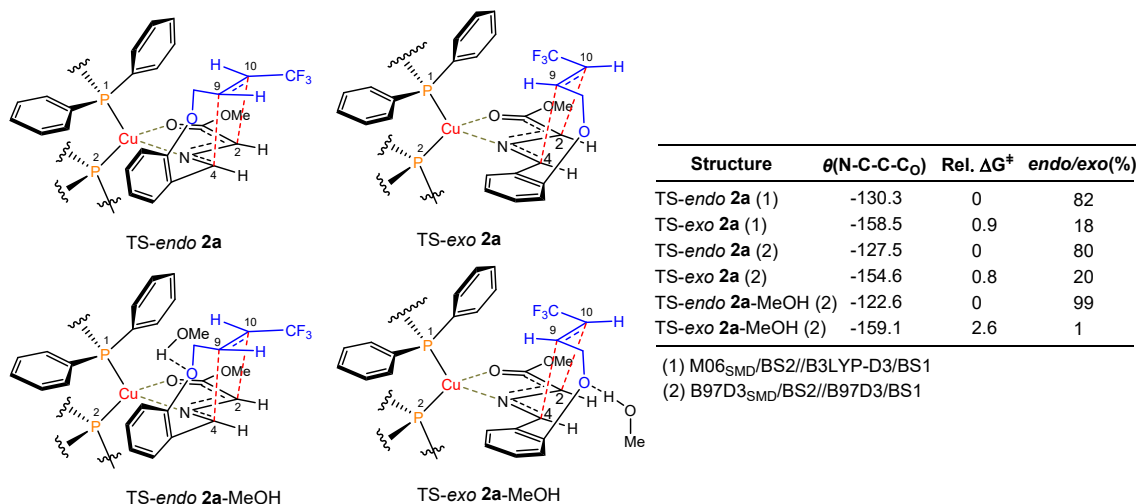

**Figure S1.** Simplified structures of the transition states for the *endo* and *exo* approaches to give compound **2a** by reaction through the less hindered (*2Re*, *4Si*) face. The increase in dihedral angle would be related to a slight distortion of the ligand aryl rings arrangement with the lack of stabilizing p-stacking interactions.

**3. Cartesian coordinates (Å) and energies (hartrees) of all the optimized structures (cartesian coordinates obtained with B3LYP-D3 except for TS *endo*-2a-MeOH and TS *exo*-2a-MeOH for which B97D3 method was used).**

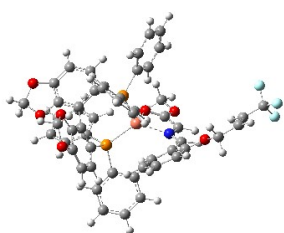

**modla**

E(B3LYPD3/BS1) = -3766.02924642  
 H(correction)= 0.878217  
 G(correction)= 0.716344  
 E(M06/BS2)<sub>CH2Cl2</sub> = -3764.89027861

E(B97D3/BS1) = -3764.60751204  
 H(correction)= 0.860897  
 G(correction)= 0.696327  
 E(B97D3/BS2)<sub>CH2Cl2</sub> = -3765.56276956

Imaginary frequencies: 0

|    |   |          |          |          |
|----|---|----------|----------|----------|
| 6  | 0 | 3.01996  | 2.57531  | -0.97622 |
| 6  | 0 | 2.76949  | 1.27413  | -0.58045 |
| 6  | 0 | 2.8778   | 3.01932  | -2.2905  |
| 8  | 0 | 3.45845  | 3.61127  | -0.18894 |
| 6  | 0 | 2.37882  | 0.36946  | -1.61904 |
| 6  | 0 | 3.02698  | 0.89301  | 0.84335  |
| 6  | 0 | 2.49862  | 2.16303  | -3.30047 |
| 8  | 0 | 3.20772  | 4.34772  | -2.37042 |
| 6  | 0 | 3.38371  | 4.77935  | -1.01369 |
| 6  | 0 | 2.2467   | 0.8273   | -2.93492 |
| 15 | 0 | 1.80952  | -1.3137  | -1.14033 |
| 6  | 0 | 2.04168  | 0.71208  | 1.86269  |
| 6  | 0 | 4.3421   | 0.72483  | 1.23873  |
| 1  | 0 | 2.39845  | 2.50222  | -4.32566 |
| 1  | 0 | 2.51874  | 5.38281  | -0.70898 |
| 1  | 0 | 4.31807  | 5.34113  | -0.93012 |
| 1  | 0 | 1.92769  | 0.13785  | -3.70818 |
| 29 | 0 | -0.15858 | -1.04735 | 0.06937  |
| 6  | 0 | 1.64967  | -2.27744 | -2.69648 |
| 6  | 0 | 3.24667  | -2.06368 | -0.27378 |
| 6  | 0 | 2.43034  | 0.34998  | 3.15763  |
| 15 | 0 | 0.25147  | 0.79737  | 1.41702  |
| 6  | 0 | 4.71356  | 0.3462   | 2.52588  |
| 8  | 0 | 5.46186  | 0.85781  | 0.45583  |
| 7  | 0 | -2.06399 | -1.72554 | -0.53013 |
| 6  | 0 | 0.44064  | -2.9674  | -2.87812 |
| 6  | 0 | 2.65884  | -2.39664 | -3.66682 |
| 6  | 0 | 2.98843  | -2.78406 | 0.9024   |
| 6  | 0 | 4.56566  | -1.92967 | -0.73172 |
| 6  | 0 | 3.77568  | 0.14986  | 3.5153   |
| 1  | 0 | 1.67138  | 0.2101   | 3.91853  |
| 6  | 0 | -0.62354 | 0.68033  | 3.03264  |
| 6  | 0 | 0.01155  | 2.54292  | 0.89907  |
| 8  | 0 | 6.07615  | 0.22221  | 2.60159  |
| 6  | 0 | 6.57645  | 0.5395   | 1.2961   |
| 6  | 0 | -2.97523 | -1.10206 | -1.2331  |

|   |   |          |          |          |
|---|---|----------|----------|----------|
| 6 | 0 | -2.31919 | -2.91389 | 0.08993  |
| 6 | 0 | 0.24181  | -3.75589 | -4.0141  |
| 1 | 0 | -0.33901 | -2.88676 | -2.1247  |
| 6 | 0 | 2.45559  | -3.18032 | -4.80148 |
| 1 | 0 | 3.60059  | -1.87111 | -3.54109 |
| 6 | 0 | 4.04554  | -3.35857 | 1.61173  |
| 1 | 0 | 1.96501  | -2.88359 | 1.2536   |
| 6 | 0 | 5.61447  | -2.52047 | -0.02774 |
| 1 | 0 | 4.77804  | -1.33495 | -1.61496 |
| 1 | 0 | 4.06159  | -0.14215 | 4.51957  |
| 6 | 0 | -0.94501 | 1.79066  | 3.82731  |
| 6 | 0 | -0.9866  | -0.60659 | 3.46676  |
| 6 | 0 | -0.99012 | 2.8272   | -0.03946 |
| 6 | 0 | 0.7695   | 3.59503  | 1.43778  |
| 1 | 0 | 7.09883  | -0.33251 | 0.88877  |
| 1 | 0 | 7.2424   | 1.40843  | 1.36156  |
| 6 | 0 | -2.71222 | 0.11146  | -1.9926  |
| 1 | 0 | -3.99385 | -1.49513 | -1.25497 |
| 6 | 0 | -1.3458  | -3.44079 | 0.94825  |
| 1 | 0 | -3.26712 | -3.42808 | -0.04989 |
| 6 | 0 | 1.24587  | -3.86064 | -4.97696 |
| 1 | 0 | -0.69855 | -4.28473 | -4.14283 |
| 1 | 0 | 3.24061  | -3.26311 | -5.54863 |
| 6 | 0 | 5.35668  | -3.22976 | 1.14957  |
| 1 | 0 | 3.84293  | -3.90388 | 2.52964  |
| 1 | 0 | 6.63353  | -2.42421 | -0.3947  |
| 6 | 0 | -1.61634 | 1.61657  | 5.03875  |
| 1 | 0 | -0.68178 | 2.79136  | 3.49956  |
| 6 | 0 | -1.64789 | -0.77429 | 4.68425  |
| 1 | 0 | -0.74657 | -1.46978 | 2.85038  |
| 6 | 0 | -1.2347  | 4.14485  | -0.43037 |
| 1 | 0 | -1.56924 | 2.01926  | -0.47299 |
| 6 | 0 | 0.51605  | 4.9118   | 1.05209  |
| 1 | 0 | 1.56173  | 3.38232  | 2.14878  |
| 6 | 0 | -3.74508 | 1.07083  | -2.16643 |
| 6 | 0 | -1.47035 | 0.3865   | -2.59226 |
| 8 | 0 | -0.2437  | -2.89009 | 1.24647  |
| 8 | 0 | -1.66733 | -4.64903 | 1.4978   |
| 1 | 0 | 1.09074  | -4.47155 | -5.86234 |
| 1 | 0 | 6.17702  | -3.67735 | 1.70447  |
| 6 | 0 | -1.96694 | 0.33523  | 5.47059  |
| 1 | 0 | -1.86744 | 2.48374  | 5.64412  |
| 1 | 0 | -1.92499 | -1.77327 | 5.01071  |
| 6 | 0 | -0.48491 | 5.18861  | 0.1153   |
| 1 | 0 | -2.00556 | 4.34347  | -1.1684  |
| 1 | 0 | 1.10025  | 5.7212   | 1.48324  |
| 6 | 0 | -3.52653 | 2.2451   | -2.88894 |
| 8 | 0 | -4.93359 | 0.75986  | -1.55637 |
| 6 | 0 | -1.24167 | 1.56358  | -3.30422 |
| 1 | 0 | -0.68382 | -0.35403 | -2.5058  |
| 6 | 0 | -0.69746 | -5.20094 | 2.3847   |
| 1 | 0 | -2.49256 | 0.20339  | 6.41278  |
| 1 | 0 | -0.677   | 6.21474  | -0.18789 |
| 6 | 0 | -2.2695  | 2.49126  | -3.45607 |
| 1 | 0 | -4.31883 | 2.97455  | -3.01308 |
| 6 | 0 | -6.00876 | 1.67135  | -1.63001 |
| 1 | 0 | -0.26466 | 1.74953  | -3.73604 |



|   |   |          |          |          |    |   |          |          |          |
|---|---|----------|----------|----------|----|---|----------|----------|----------|
| 1 | 0 | -0.5154  | -4.54034 | 3.2401   | 6  | 0 | -2.30069 | -2.37348 | 0.89273  |
| 1 | 0 | -1.11812 | -6.1486  | 2.7278   | 6  | 0 | -1.28498 | -1.3725  | -3.18001 |
| 1 | 0 | 0.25602  | -5.37701 | 1.87431  | 15 | 0 | 0.16702  | 0.37769  | -1.47728 |
| 1 | 0 | -2.10671 | 3.40855  | -4.01516 | 6  | 0 | -3.57546 | -1.92078 | -2.90883 |
| 1 | 0 | -5.71225 | 2.6574   | -1.23417 | 8  | 0 | -4.9349  | -0.98026 | -1.36737 |
| 1 | 0 | -6.31883 | 1.82823  | -2.67679 | 7  | 0 | 2.47417  | -0.36438 | 1.64188  |
| 6 | 0 | -7.16501 | 1.14596  | -0.83608 | 6  | 0 | -0.26231 | -1.41516 | 3.99537  |
| 6 | 0 | -7.14451 | 0.02337  | -0.12198 | 6  | 0 | -2.63749 | -0.95328 | 4.10834  |
| 1 | 0 | -8.06535 | 1.75524  | -0.86671 | 6  | 0 | -1.59448 | -3.30925 | 0.12256  |
| 1 | 0 | -6.2636  | -0.60662 | -0.06406 | 6  | 0 | -3.66627 | -2.57165 | 1.14272  |
| 6 | 0 | -8.32487 | -0.46139 | 0.65337  | 6  | 0 | -2.39979 | -2.12292 | -3.59776 |
| 9 | 0 | -9.38927 | 0.36956  | 0.56917  | 1  | 0 | -0.35042 | -1.50603 | -3.71208 |
| 9 | 0 | -8.72875 | -1.67809 | 0.21619  | 6  | 0 | 1.51131  | 0.03994  | -2.68317 |
| 9 | 0 | -8.02385 | -0.60001 | 1.96576  | 6  | 0 | -0.24304 | 2.15432  | -1.6606  |

-----

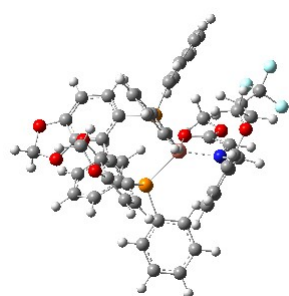

TS *endo-2a*

E(B3LYPD3/BS1) = -3766.0190927

H(correction)= 0.877234

G(correction)= 0.723963

E(M06/BS2)<sub>CH<sub>2</sub>Cl<sub>2</sub></sub> = -3764.87320683

Imaginary frequencies: 1 (-340.5644 cm<sup>-1</sup>)

E(B97D3/BS1) = -3764.60601334

H(correction)= 0.860190

G(correction)= 0.705236

E(B97D3/BS2)<sub>CH<sub>2</sub>Cl<sub>2</sub></sub> = -3765.55277115

Imaginary frequencies: 1 (-308.1047 cm<sup>-1</sup>)

|    |   |          |          |          |   |   |          |          |          |
|----|---|----------|----------|----------|---|---|----------|----------|----------|
| 6  | 0 | -3.41629 | 1.90202  | -0.6053  | 1 | 0 | -5.93529 | -2.79241 | -1.40373 |
| 6  | 0 | -2.78491 | 0.7094   | -0.30088 | 6 | 0 | -4.31533 | -3.69652 | 0.63521  |
| 6  | 0 | -3.62219 | 2.9194   | 0.32328  | 1 | 0 | -4.22842 | -1.84004 | 1.71452  |
| 8  | 0 | -3.89383 | 2.29184  | -1.83032 | 1 | 0 | -2.33868 | -2.82267 | -4.42376 |
| 6  | 0 | -2.40026 | 0.53715  | 1.06569  | 6 | 0 | 2.18764  | 1.05844  | -3.37044 |
| 6  | 0 | -2.57397 | -0.27528 | -1.40644 | 6 | 0 | 2.01917  | -1.27245 | -2.73951 |
| 6  | 0 | -3.2209  | 2.78644  | 1.63443  | 6 | 0 | -0.11261 | 2.98616  | -0.54077 |
| 8  | 0 | -4.2347  | 3.98531  | -0.28138 | 6 | 0 | -0.73021 | 2.68538  | -2.86594 |
| 6  | 0 | -4.34556 | 3.64118  | -1.67033 | 1 | 0 | -6.54232 | -1.53066 | -2.55198 |
| 6  | 0 | -2.60751 | 1.57082  | 1.9868   | 6 | 0 | 2.22926  | 1.97102  | 2.28922  |
| 15 | 0 | -1.37062 | -0.91637 | 1.52228  | 1 | 0 | 3.95251  | 0.69047  | 2.68775  |
| 6  | 0 | -1.34559 | -0.46993 | -2.11365 | 6 | 0 | 2.74607  | -2.52799 | 0.66767  |
| 6  | 0 | -3.65452 | -1.00805 | -1.85965 | 1 | 0 | 4.25053  | -1.5221  | 1.86987  |
| 1  | 0 | -3.36125 | 3.58315  | 2.35617  | 6 | 0 | -1.4077  | -1.48487 | 6.12444  |
| 1  | 0 | -3.70525 | 4.30695  | -2.2599  | 1 | 0 | 0.69951  | -1.87234 | 5.8669   |
| 1  | 0 | -5.39407 | 3.71239  | -1.97901 | 1 | 0 | -3.51945 | -1.04097 | 6.06954  |
| 1  | 0 | -2.26823 | 1.44708  | 3.00795  | 6 | 0 | -3.61196 | -4.62056 | -0.14442 |
| 29 | 0 | 0.71552  | -0.48991 | 0.61397  | 1 | 0 | -1.70454 | -5.13749 | -1.00836 |
| 6  | 0 | -1.46368 | -1.08288 | 3.34891  | 1 | 0 | -5.37134 | -3.85049 | 0.84362  |
|    |   |          |          |          | 6 | 0 | 3.34852  | 0.77032  | -4.0933  |
|    |   |          |          |          | 1 | 0 | 1.82796  | 2.08094  | -3.32476 |
|    |   |          |          |          | 6 | 0 | 3.16969  | -1.55562 | -3.47301 |
|    |   |          |          |          | 1 | 0 | 1.55029  | -2.05574 | -2.15377 |
|    |   |          |          |          | 6 | 0 | -0.44907 | 4.33824  | -0.62894 |
|    |   |          |          |          | 1 | 0 | 0.23221  | 2.57399  | 0.40208  |
|    |   |          |          |          | 6 | 0 | -1.0516  | 4.03917  | -2.95513 |
|    |   |          |          |          | 1 | 0 | -0.85994 | 2.03706  | -3.72818 |
|    |   |          |          |          | 6 | 0 | 2.53315  | 3.22061  | 1.71642  |
|    |   |          |          |          | 6 | 0 | 1.109    | 1.8877   | 3.13301  |
|    |   |          |          |          | 8 | 0 | 1.6317   | -2.54899 | 0.11445  |
|    |   |          |          |          | 8 | 0 | 3.56863  | -3.59265 | 0.64208  |
|    |   |          |          |          | 1 | 0 | -1.3878  | -1.63671 | 7.20031  |
|    |   |          |          |          | 1 | 0 | -4.12315 | -5.48961 | -0.55005 |

|                                                                                     |   |          |          |          |    |   |          |          |          |
|-------------------------------------------------------------------------------------|---|----------|----------|----------|----|---|----------|----------|----------|
| 6                                                                                   | 0 | 3.84369  | -0.53281 | -4.14566 | 6  | 0 | -2.89684 | 3.32672  | -1.25082 |
| 1                                                                                   | 0 | 3.87241  | 1.57288  | -4.6054  | 8  | 0 | -3.50109 | 1.73081  | -2.7314  |
| 1                                                                                   | 0 | 3.56517  | -2.56727 | -3.48275 | 6  | 0 | -2.05821 | 1.50477  | 0.67333  |
| 6                                                                                   | 0 | -0.91184 | 4.86674  | -1.8348  | 6  | 0 | -2.79373 | -0.4381  | -0.88541 |
| 1                                                                                   | 0 | -0.34791 | 4.96653  | 0.24946  | 6  | 0 | -2.45712 | 3.82602  | -0.04434 |
| 1                                                                                   | 0 | -1.41577 | 4.44793  | -3.89434 | 8  | 0 | -3.38716 | 4.00749  | -2.33551 |
| 6                                                                                   | 0 | 1.79525  | 4.36039  | 2.06385  | 6  | 0 | -3.54233 | 3.01612  | -3.36086 |
| 8                                                                                   | 0 | 3.52279  | 3.39006  | 0.79131  | 6  | 0 | -2.02761 | 2.8848   | 0.90985  |
| 6                                                                                   | 0 | 0.34836  | 3.01154  | 3.45156  | 15 | 0 | -1.20122 | 0.35605  | 1.83273  |
| 1                                                                                   | 0 | 0.85226  | 0.92057  | 3.55077  | 6  | 0 | -1.8345  | -1.40373 | -1.31135 |
| 6                                                                                   | 0 | 3.17856  | -4.66726 | -0.21743 | 6  | 0 | -4.09734 | -0.88841 | -0.77142 |
| 1                                                                                   | 0 | 4.75877  | -0.74814 | -4.68958 | 1  | 0 | -2.43515 | 4.89125  | 0.15725  |
| 1                                                                                   | 0 | -1.16893 | 5.92065  | -1.90328 | 1  | 0 | -2.71085 | 3.09543  | -4.07432 |
| 6                                                                                   | 0 | 0.71239  | 4.25892  | 2.93352  | 1  | 0 | -4.51044 | 3.14893  | -3.84994 |
| 1                                                                                   | 0 | 2.07307  | 5.3057   | 1.60789  | 1  | 0 | -1.64448 | 3.25301  | 1.85482  |
| 6                                                                                   | 0 | 3.68391  | 2.31724  | -0.16116 | 29 | 0 | 0.75794  | -0.30417 | 0.67943  |
| 1                                                                                   | 0 | -0.5051  | 2.91887  | 4.11731  | 6  | 0 | -0.99602 | 1.33181  | 3.3776   |
| 1                                                                                   | 0 | 3.1464   | -4.3291  | -1.25868 | 6  | 0 | -2.4282  | -0.94425 | 2.24254  |
| 1                                                                                   | 0 | 3.94609  | -5.43263 | -0.09657 | 6  | 0 | -2.23607 | -2.72288 | -1.56108 |
| 1                                                                                   | 0 | 2.19677  | -5.06034 | 0.06293  | 15 | 0 | -0.04688 | -0.94436 | -1.40224 |
| 1                                                                                   | 0 | 0.14174  | 5.14799  | 3.19013  | 6  | 0 | -4.47775 | -2.20695 | -0.99921 |
| 1                                                                                   | 0 | 2.70392  | 2.03712  | -0.57141 | 8  | 0 | -5.18778 | -0.15902 | -0.36149 |
| 1                                                                                   | 0 | 4.27044  | 2.77558  | -0.96544 | 7  | 0 | 2.53439  | 0.43521  | 1.47404  |
| 6                                                                                   | 0 | 4.3819   | 1.11241  | 0.40779  | 6  | 0 | 0.29991  | 1.77682  | 3.68085  |
| 6                                                                                   | 0 | 4.38096  | -0.09957 | -0.29532 | 6  | 0 | -2.05498 | 1.66397  | 4.238    |
| 1                                                                                   | 0 | 5.29966  | 1.36354  | 0.94094  | 6  | 0 | -1.94355 | -2.25413 | 2.37786  |
| 1                                                                                   | 0 | 3.6408   | -0.26315 | -1.06771 | 6  | 0 | -3.80073 | -0.69455 | 2.39374  |
| 6                                                                                   | 0 | 5.61441  | -0.88295 | -0.50024 | 6  | 0 | -3.56385 | -3.15563 | -1.40173 |
| 9                                                                                   | 0 | 6.34183  | -1.03575 | 0.6404   | 1  | 0 | -1.50016 | -3.44811 | -1.88544 |
| 9                                                                                   | 0 | 5.35169  | -2.12852 | -0.98657 | 6  | 0 | 0.72178  | -2.45716 | -2.10639 |
| 9                                                                                   | 0 | 6.47264  | -0.3203  | -1.4087  | 6  | 0 | 0.03566  | 0.30445  | -2.7422  |
| -----                                                                               |   |          |          |          | 8  | 0 | -5.81571 | -2.35873 | -0.74149 |
| 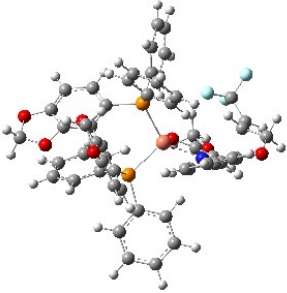 |   |          |          |          | 6  | 0 | -6.30723 | -1.04789 | -0.43534 |
| <b>TS <i>exo</i>-2a</b>                                                             |   |          |          |          | 6  | 0 | 3.31195  | 1.49549  | 1.14724  |
| E(B3LYPD3/BS1) = -3766.01530655                                                     |   |          |          |          | 6  | 0 | 3.19887  | -0.52049 | 2.14443  |
| H(correction)= 0.877066                                                             |   |          |          |          | 6  | 0 | 0.52968  | 2.55554  | 4.81748  |
| G(correction)= 0.720783                                                             |   |          |          |          | 1  | 0 | 1.12322  | 1.50445  | 3.02744  |
| E(M06/BS2) <sub>CH<sub>2</sub>Cl<sub>2</sub></sub> = -3764.8686453                  |   |          |          |          | 6  | 0 | -1.82063 | 2.43623  | 5.37492  |
| Imaginary frequencies: 1 (-382.2543 cm <sup>-1</sup> )                              |   |          |          |          | 1  | 0 | -3.0602  | 1.3141   | 4.02626  |
|                                                                                     |   |          |          |          | 6  | 0 | -2.82415 | -3.29825 | 2.6689   |
|                                                                                     |   |          |          |          | 1  | 0 | -0.88274 | -2.44836 | 2.23845  |
|                                                                                     |   |          |          |          | 6  | 0 | -4.67526 | -1.74089 | 2.68535  |
|                                                                                     |   |          |          |          | 1  | 0 | -4.19086 | 0.30605  | 2.23378  |
|                                                                                     |   |          |          |          | 1  | 0 | -3.85352 | -4.18458 | -1.58303 |
|                                                                                     |   |          |          |          | 6  | 0 | 0.83592  | -2.69366 | -3.48288 |
|                                                                                     |   |          |          |          | 6  | 0 | 1.19533  | -3.41725 | -1.19826 |
|                                                                                     |   |          |          |          | 6  | 0 | 1.06542  | 1.25295  | -2.67353 |
|                                                                                     |   |          |          |          | 6  | 0 | -0.87242 | 0.34842  | -3.81116 |
|                                                                                     |   |          |          |          | 1  | 0 | -6.81683 | -1.07016 | 0.53307  |
|                                                                                     |   |          |          |          | 1  | 0 | -6.98671 | -0.71573 | -1.23176 |
|                                                                                     |   |          |          |          | 6  | 0 | 2.82406  | 2.6518   | 0.37911  |
|                                                                                     |   |          |          |          | 1  | 0 | 4.09373  | 1.7586   | 1.8703   |
|                                                                                     |   |          |          |          | 6  | 0 | 2.56385  | -1.80675 | 2.31356  |
|                                                                                     |   |          |          |          | 1  | 0 | 4.03791  | -0.28679 | 2.79514  |
|                                                                                     |   |          |          |          | 6  | 0 | -0.52866 | 2.88688  | 5.6643   |
|                                                                                     |   |          |          |          | 1  | 0 | 1.53686  | 2.89779  | 5.03962  |
| 6                                                                                   | 0 | -2.95116 | 1.95405  | -1.49218 | 1  | 0 | -2.64572 | 2.68665  | 6.03663  |
| 6                                                                                   | 0 | -2.54406 | 1.0026   | -0.57504 | 1  | 0 |          |          |          |

|   |   |          |          |          |
|---|---|----------|----------|----------|
| 6 | 0 | -4.18851 | -3.04399 | 2.82264  |
| 1 | 0 | -2.44507 | -4.31231 | 2.76368  |
| 1 | 0 | -5.73794 | -1.54178 | 2.79983  |
| 6 | 0 | 1.4139   | -3.87774 | -3.94463 |
| 1 | 0 | 0.48435  | -1.9533  | -4.19475 |
| 6 | 0 | 1.76269  | -4.60214 | -1.66441 |
| 1 | 0 | 1.15415  | -3.21376 | -0.13293 |
| 6 | 0 | 1.19387  | 2.23149  | -3.65971 |
| 1 | 0 | 1.74862  | 1.24019  | -1.8309  |
| 6 | 0 | -0.73749 | 1.32238  | -4.80185 |
| 1 | 0 | -1.69044 | -0.36391 | -3.85706 |
| 6 | 0 | 3.81891  | 3.41533  | -0.26973 |
| 6 | 0 | 1.48377  | 3.01486  | 0.20619  |
| 8 | 0 | 1.48064  | -2.13669 | 1.79948  |
| 8 | 0 | 3.27287  | -2.6553  | 3.07953  |
| 1 | 0 | -0.35009 | 3.49023  | 6.55049  |
| 1 | 0 | -4.8736  | -3.8592  | 3.03945  |
| 6 | 0 | 1.87426  | -4.83458 | -3.03739 |
| 1 | 0 | 1.50719  | -4.05026 | -5.01367 |
| 1 | 0 | 2.13973  | -5.33321 | -0.95417 |
| 6 | 0 | 0.2932   | 2.26535  | -4.72654 |
| 1 | 0 | 1.98228  | 2.97296  | -3.57476 |
| 1 | 0 | -1.43931 | 1.34617  | -5.63202 |
| 6 | 0 | 3.4709   | 4.51905  | -1.05296 |
| 8 | 0 | 5.14927  | 3.14436  | -0.10527 |
| 6 | 0 | 1.13195  | 4.11557  | -0.57513 |
| 1 | 0 | 0.71267  | 2.42597  | 0.68987  |
| 6 | 0 | 2.81634  | -4.01251 | 3.08683  |
| 1 | 0 | 2.32896  | -5.75284 | -3.39977 |
| 1 | 0 | 0.38929  | 3.02697  | -5.49615 |
| 6 | 0 | 2.12794  | 4.87251  | -1.19759 |
| 1 | 0 | 4.26459  | 5.08271  | -1.53368 |
| 6 | 0 | 5.64498  | 1.77802  | -0.15344 |
| 1 | 0 | 0.08511  | 4.37192  | -0.69762 |
| 1 | 0 | 2.86528  | -4.4271  | 2.07514  |
| 1 | 0 | 3.49843  | -4.5475  | 3.74888  |
| 1 | 0 | 1.78968  | -4.08097 | 3.45846  |
| 1 | 0 | 1.86093  | 5.73345  | -1.80513 |
| 1 | 0 | 6.23439  | 1.70682  | -1.07693 |
| 1 | 0 | 6.33385  | 1.68441  | 0.69384  |
| 6 | 0 | 4.61391  | 0.67869  | -0.12065 |
| 6 | 0 | 4.95555  | -0.5878  | 0.38778  |
| 1 | 0 | 3.96779  | 0.6651   | -0.99661 |
| 1 | 0 | 5.83343  | -0.72612 | 1.01213  |
| 6 | 0 | 4.53126  | -1.7955  | -0.34585 |
| 9 | 0 | 4.406    | -2.90734 | 0.4379   |
| 9 | 0 | 3.33694  | -1.61249 | -0.97111 |
| 9 | 0 | 5.40918  | -2.16865 | -1.33014 |

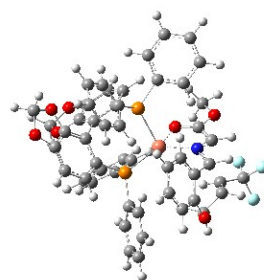

TS *endo ent-2a*

E(B3LYPD3/BS1) = -3766.01264509  
H(correction)= 0.877177  
G(correction)= 0.722488  
E(M06/BS2)<sub>CH<sub>2</sub>Cl<sub>2</sub></sub> = -3764.86837278  
Imaginary frequencies: 1 (-338.8548 cm<sup>-1</sup>)

E(B97D3/BS1) = -3764.5992416  
H(correction)= 0.860168  
G(correction)= 0.703646  
E(B97D3/BS2)<sub>CH<sub>2</sub>Cl<sub>2</sub></sub> = -3765.54751467  
Imaginary frequencies: 1 (-284.9258 cm<sup>-1</sup>)

|    |   |          |          |          |
|----|---|----------|----------|----------|
| 6  | 0 | -4.084   | 1.18992  | -0.11319 |
| 6  | 0 | -2.89733 | 0.72011  | 0.41712  |
| 6  | 0 | -4.30774 | 2.52815  | -0.42562 |
| 8  | 0 | -5.19345 | 0.44926  | -0.43405 |
| 6  | 0 | -1.88955 | 1.70318  | 0.67127  |
| 6  | 0 | -2.78334 | -0.73206 | 0.74542  |
| 6  | 0 | -3.35211 | 3.48966  | -0.18194 |
| 8  | 0 | -5.55985 | 2.67924  | -0.96017 |
| 6  | 0 | -6.10921 | 1.35685  | -1.05629 |
| 6  | 0 | -2.13839 | 3.04827  | 0.37665  |
| 15 | 0 | -0.21916 | 1.14368  | 1.24609  |
| 6  | 0 | -2.05839 | -1.70175 | -0.011   |
| 6  | 0 | -3.42969 | -1.20193 | 1.87521  |
| 1  | 0 | -3.52578 | 4.53507  | -0.41125 |
| 1  | 0 | -6.22197 | 1.08901  | -2.11345 |
| 1  | 0 | -7.06894 | 1.32326  | -0.52982 |
| 1  | 0 | -1.37513 | 3.78947  | 0.57995  |
| 29 | 0 | 0.82064  | -0.16137 | -0.36502 |
| 6  | 0 | 0.65897  | 2.69065  | 1.70905  |
| 6  | 0 | -0.58855 | 0.30292  | 2.83612  |
| 6  | 0 | -1.95711 | -3.01882 | 0.45464  |
| 15 | 0 | -1.03274 | -1.14652 | -1.43437 |
| 6  | 0 | -3.33314 | -2.51727 | 2.31863  |
| 8  | 0 | -4.20888 | -0.47742 | 2.74238  |
| 7  | 0 | 2.67801  | -0.51663 | -1.13341 |
| 6  | 0 | 1.13548  | 3.50087  | 0.66289  |
| 6  | 0 | 0.94511  | 3.05239  | 3.03351  |
| 6  | 0 | 0.00692  | -0.93935 | 3.09566  |
| 6  | 0 | -1.46817 | 0.86262  | 3.77706  |
| 6  | 0 | -2.59084 | -3.4536  | 1.63147  |
| 1  | 0 | -1.3552  | -3.73106 | -0.09633 |
| 6  | 0 | -0.7041  | -2.65248 | -2.42971 |
| 6  | 0 | -2.1508  | -0.12443 | -2.48003 |
| 8  | 0 | -4.04526 | -2.67235 | 3.47962  |
| 6  | 0 | -4.58023 | -1.37848 | 3.79135  |
| 6  | 0 | 3.51931  | 0.40383  | -1.64666 |

|   |   |          |          |          |
|---|---|----------|----------|----------|
| 6 | 0 | 3.26196  | -1.64647 | -0.69071 |
| 6 | 0 | 1.84842  | 4.66601  | 0.94085  |
| 1 | 0 | 0.96831  | 3.21249  | -0.37174 |
| 6 | 0 | 1.68023  | 4.20842  | 3.30565  |
| 1 | 0 | 0.60425  | 2.43226  | 3.85521  |
| 6 | 0 | -0.27369 | -1.61033 | 4.28809  |
| 1 | 0 | 0.65336  | -1.39369 | 2.35154  |
| 6 | 0 | -1.7281  | 0.19739  | 4.97469  |
| 1 | 0 | -1.95422 | 1.81077  | 3.56533  |
| 1 | 0 | -2.49782 | -4.47448 | 1.9848   |
| 6 | 0 | -1.66471 | -3.62945 | -2.73925 |
| 6 | 0 | 0.60321  | -2.7985  | -2.91767 |
| 6 | 0 | -1.73171 | 1.18627  | -2.74992 |
| 6 | 0 | -3.37444 | -0.57225 | -2.99783 |
| 1 | 0 | -4.14941 | -1.02901 | 4.73599  |
| 1 | 0 | -5.67314 | -1.43987 | 3.84762  |
| 6 | 0 | 2.93759  | 1.69053  | -2.11437 |
| 1 | 0 | 4.36303  | 0.04237  | -2.24302 |
| 6 | 0 | 2.43524  | -2.56794 | 0.05597  |
| 1 | 0 | 4.16143  | -2.04277 | -1.15469 |
| 6 | 0 | 2.12515  | 5.02167  | 2.26283  |
| 1 | 0 | 2.20843  | 5.2768   | 0.12047  |
| 1 | 0 | 1.90317  | 4.47111  | 4.33638  |
| 6 | 0 | -1.13511 | -1.04387 | 5.22916  |
| 1 | 0 | 0.17715  | -2.58082 | 4.47628  |
| 1 | 0 | -2.39888 | 0.64294  | 5.70509  |
| 6 | 0 | -1.32258 | -4.72708 | -3.52806 |
| 1 | 0 | -2.67113 | -3.54778 | -2.33987 |
| 6 | 0 | 0.94251  | -3.89773 | -3.70979 |
| 1 | 0 | 1.35282  | -2.05644 | -2.65818 |
| 6 | 0 | -2.52144 | 2.03898  | -3.52162 |
| 1 | 0 | -0.79575 | 1.54129  | -2.33029 |
| 6 | 0 | -4.15819 | 0.27663  | -3.77988 |
| 1 | 0 | -3.72312 | -1.57718 | -2.78379 |
| 6 | 0 | 3.4596   | 2.92346  | -1.68259 |
| 6 | 0 | 1.86953  | 1.70532  | -3.02671 |
| 8 | 0 | 1.31701  | -2.29802 | 0.52422  |
| 8 | 0 | 2.99285  | -3.78266 | 0.21789  |
| 1 | 0 | 2.69667  | 5.92073  | 2.47654  |
| 1 | 0 | -1.34896 | -1.56789 | 6.15702  |
| 6 | 0 | -0.019   | -4.86139 | -4.01665 |
| 1 | 0 | -2.07138 | -5.48014 | -3.75955 |
| 1 | 0 | 1.95987  | -4.00289 | -4.07669 |
| 6 | 0 | -3.73596 | 1.58476  | -4.03955 |
| 1 | 0 | -2.19049 | 3.05693  | -3.70782 |
| 1 | 0 | -5.10079 | -0.08166 | -4.18653 |
| 6 | 0 | 2.99955  | 4.12166  | -2.24855 |
| 8 | 0 | 4.40223  | 3.02953  | -0.70269 |
| 6 | 0 | 1.36711  | 2.89786  | -3.54684 |
| 1 | 0 | 1.4448   | 0.75219  | -3.33019 |
| 6 | 0 | 2.25875  | -4.69814 | 1.037    |
| 1 | 0 | 0.2451   | -5.7195  | -4.62907 |
| 1 | 0 | -4.35382 | 2.24599  | -4.64115 |
| 6 | 0 | 1.96032  | 4.10989  | -3.17507 |
| 1 | 0 | 3.45778  | 5.05019  | -1.92197 |
| 6 | 0 | 4.33353  | 2.06175  | 0.37066  |
| 1 | 0 | 0.54151  | 2.87785  | -4.25284 |

|   |   |         |          |          |
|---|---|---------|----------|----------|
| 1 | 0 | 1.27034 | -4.89569 | 0.61045  |
| 1 | 0 | 2.85461 | -5.61133 | 1.06197  |
| 1 | 0 | 2.13453 | -4.29807 | 2.04846  |
| 1 | 0 | 1.60355 | 5.04681  | -3.595   |
| 1 | 0 | 4.96302 | 2.50856  | 1.14811  |
| 1 | 0 | 3.30554 | 2.00513  | 0.75046  |
| 6 | 0 | 4.82739 | 0.69793  | -0.02598 |
| 6 | 0 | 4.62098 | -0.41254 | 0.80168  |
| 1 | 0 | 5.77483 | 0.7251   | -0.56434 |
| 1 | 0 | 3.88318 | -0.37542 | 1.59837  |
| 6 | 0 | 5.69378 | -1.40543 | 1.02077  |
| 9 | 0 | 6.67435 | -0.97532 | 1.87383  |
| 9 | 0 | 5.22348 | -2.55821 | 1.56414  |
| 9 | 0 | 6.33853 | -1.73453 | -0.13508 |

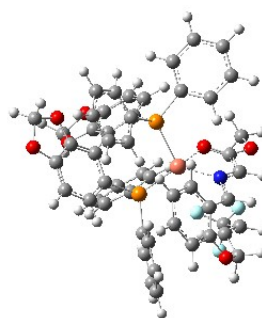

TS exo ent-2a

E(B3LYPD3/BS1) = -3766.02074809  
H(correction)= 0.876981  
G(correction)= 0.724065  
E(M06/BS2)<sub>CH<sub>2</sub>Cl<sub>2</sub></sub> = -3764.8725154  
Imaginary frequencies: 1 (-379.6645 cm<sup>-1</sup>)

E(B97D3/BS1) = -3764.60438467  
H(correction)= 0.859717  
G(correction)= 0.703442  
E(B97D3/BS2)<sub>CH<sub>2</sub>Cl<sub>2</sub></sub> = -3765.54954375  
Imaginary frequencies: 1 (-440.9579 cm<sup>-1</sup>)

|    |   |          |          |          |
|----|---|----------|----------|----------|
| 6  | 0 | 3.57635  | 1.31285  | -1.53863 |
| 6  | 0 | 2.4991   | 0.48541  | -1.28411 |
| 6  | 0 | 3.48919  | 2.47218  | -2.30506 |
| 8  | 0 | 4.86192  | 1.15535  | -1.08469 |
| 6  | 0 | 1.25632  | 0.86972  | -1.882   |
| 6  | 0 | 2.72909  | -0.76437 | -0.497   |
| 6  | 0 | 2.30509  | 2.85172  | -2.89745 |
| 8  | 0 | 4.71249  | 3.08852  | -2.358   |
| 6  | 0 | 5.57202  | 2.32767  | -1.49684 |
| 6  | 0 | 1.18952  | 2.02363  | -2.67004 |
| 15 | 0 | -0.25677 | -0.10602 | -1.45571 |
| 6  | 0 | 2.37365  | -0.97734 | 0.86997  |
| 6  | 0 | 3.35373  | -1.82331 | -1.13187 |
| 1  | 0 | 2.23524  | 3.74514  | -3.50793 |
| 1  | 0 | 5.82154  | 2.92801  | -0.61349 |
| 1  | 0 | 6.47052  | 2.03372  | -2.04915 |
| 1  | 0 | 0.24909  | 2.30113  | -3.13089 |
| 29 | 0 | -0.72693 | 0.02135  | 0.81362  |

|    |   |          |          |          |       |   |          |          |          |
|----|---|----------|----------|----------|-------|---|----------|----------|----------|
| 6  | 0 | -1.60946 | 0.53085  | -2.52253 | 1     | 0 | 1.09592  | -5.31748 | -3.39097 |
| 6  | 0 | 0.15143  | -1.77191 | -2.11133 | 6     | 0 | 1.48065  | -0.62425 | 6.29037  |
| 6  | 0 | 2.58684  | -2.22755 | 1.46335  | 1     | 0 | 3.61284  | -0.90319 | 6.09814  |
| 15 | 0 | 1.38978  | 0.30484  | 1.74899  | 1     | 0 | -0.65109 | -0.31355 | 6.16496  |
| 6  | 0 | 3.57278  | -3.05736 | -0.52635 | 6     | 0 | 3.63708  | 4.30649  | 1.02085  |
| 8  | 0 | 3.81208  | -1.8549  | -2.42461 | 1     | 0 | 1.79936  | 4.90455  | 0.05584  |
| 7  | 0 | -2.51179 | 0.20088  | 1.82911  | 1     | 0 | 5.33004  | 3.41709  | 2.02262  |
| 6  | 0 | -2.09183 | 1.83276  | -2.29204 | 6     | 0 | -3.73451 | 4.40505  | -0.25784 |
| 6  | 0 | -2.30057 | -0.30039 | -3.41645 | 8     | 0 | -5.24808 | 2.62675  | -0.12747 |
| 6  | 0 | -0.0107  | -2.88657 | -1.27677 | 6     | 0 | -1.57437 | 4.33715  | 0.82978  |
| 6  | 0 | 0.66589  | -1.94104 | -3.40604 | 1     | 0 | -1.18378 | 2.54908  | 1.97753  |
| 6  | 0 | 3.19069  | -3.29549 | 0.77603  | 6     | 0 | -1.8325  | -4.39572 | 2.6974   |
| 1  | 0 | 2.26096  | -2.39299 | 2.48329  | 1     | 0 | 1.47113  | -0.82847 | 7.35779  |
| 6  | 0 | 1.51118  | -0.09582 | 3.53543  | 1     | 0 | 4.14455  | 5.24764  | 0.8268   |
| 6  | 0 | 2.33453  | 1.8698   | 1.5182   | 6     | 0 | -2.51146 | 5.00502  | 0.03453  |
| 8  | 0 | 4.17611  | -3.91125 | -1.41234 | 1     | 0 | -4.47243 | 4.89799  | -0.88357 |
| 6  | 0 | 4.28452  | -3.18783 | -2.64702 | 6     | 0 | -5.57153 | 1.21553  | -0.0796  |
| 6  | 0 | -3.46847 | 1.11727  | 1.56609  | 1     | 0 | -0.62316 | 4.80081  | 1.07415  |
| 6  | 0 | -2.95656 | -0.95875 | 2.33069  | 1     | 0 | -0.80025 | -4.30218 | 3.0473   |
| 6  | 0 | -3.21118 | 2.30256  | -2.97859 | 1     | 0 | -2.36189 | -5.16104 | 3.2668   |
| 1  | 0 | -1.61869 | 2.47339  | -1.55249 | 1     | 0 | -1.83347 | -4.64781 | 1.63219  |
| 6  | 0 | -3.43657 | 0.16613  | -4.08002 | 1     | 0 | -2.2917  | 5.99384  | -0.35944 |
| 1  | 0 | -1.97257 | -1.32124 | -3.57566 | 1     | 0 | -6.27366 | 1.06167  | 0.75086  |
| 6  | 0 | 0.33619  | -4.15703 | -1.73916 | 1     | 0 | -6.11552 | 1.04375  | -1.01508 |
| 1  | 0 | -0.38999 | -2.7542  | -0.26945 | 6     | 0 | -4.41592 | 0.25251  | 0.02041  |
| 6  | 0 | 0.99271  | -3.21525 | -3.8695  | 6     | 0 | -4.65394 | -1.07976 | 0.38183  |
| 1  | 0 | 0.81605  | -1.07543 | -4.04538 | 1     | 0 | -3.65403 | 0.40815  | -0.73882 |
| 1  | 0 | 3.34419  | -4.26082 | 1.24536  | 1     | 0 | -5.5572  | -1.36327 | 0.91522  |
| 6  | 0 | 2.70252  | -0.40308 | 4.21323  | 6     | 0 | -4.01945 | -2.18897 | -0.34964 |
| 6  | 0 | 0.30344  | -0.07441 | 4.25028  | 9     | 0 | -2.73952 | -1.90928 | -0.73583 |
| 6  | 0 | 1.6738   | 2.90923  | 0.8479   | 9     | 0 | -3.96962 | -3.34729 | 0.36734  |
| 6  | 0 | 3.66103  | 2.06078  | 1.93028  | 9     | 0 | -4.6695  | -2.52417 | -1.51243 |
| 1  | 0 | 3.65698  | -3.67052 | -3.40431 | ----- |   |          |          |          |
| 1  | 0 | 5.33509  | -3.15394 | -2.95671 |       |   |          |          |          |
| 6  | 0 | -3.11321 | 2.45639  | 1.06176  |       |   |          |          |          |
| 1  | 0 | -4.35438 | 1.09873  | 2.21173  |       |   |          |          |          |
| 6  | 0 | -2.06298 | -2.09073 | 2.29902  |       |   |          |          |          |
| 1  | 0 | -3.85723 | -1.02331 | 2.93442  |       |   |          |          |          |
| 6  | 0 | -3.88919 | 1.46968  | -3.8715  |       |   |          |          |          |
| 1  | 0 | -3.56925 | 3.3074   | -2.78209 |       |   |          |          |          |
| 1  | 0 | -3.97071 | -0.49697 | -4.75501 |       |   |          |          |          |
| 6  | 0 | 0.83187  | -4.3254  | -3.03363 |       |   |          |          |          |
| 1  | 0 | 0.2215   | -5.01572 | -1.08338 |       |   |          |          |          |
| 1  | 0 | 1.37898  | -3.34113 | -4.87793 |       |   |          |          |          |
| 6  | 0 | 2.68617  | -0.66448 | 5.58278  |       |   |          |          |          |
| 1  | 0 | 3.6383   | -0.46911 | 3.66667  |       |   |          |          |          |
| 6  | 0 | 0.29035  | -0.3327  | 5.62263  |       |   |          |          |          |
| 1  | 0 | -0.6234  | 0.13052  | 3.72109  |       |   |          |          |          |
| 6  | 0 | 2.32063  | 4.11887  | 0.59553  |       |   |          |          |          |
| 1  | 0 | 0.66202  | 2.75192  | 0.49141  |       |   |          |          |          |
| 6  | 0 | 4.30448  | 3.27573  | 1.69047  | 6     | 0 | -3.0239  | 2.27928  | -1.02786 |
| 1  | 0 | 4.19986  | 1.26279  | 2.42953  | 6     | 0 | -2.67665 | 1.03133  | -0.51974 |
| 6  | 0 | -4.0375  | 3.12999  | 0.23969  | 6     | 0 | -2.8948  | 3.4668   | -0.30031 |
| 6  | 0 | -1.88664 | 3.07625  | 1.33895  | 8     | 0 | -3.47061 | 2.55807  | -2.29977 |
| 8  | 0 | -0.94788 | -2.09757 | 1.75247  | 6     | 0 | -2.25522 | 1.01009  | 0.85052  |
| 8  | 0 | -2.56223 | -3.18271 | 2.91182  | 6     | 0 | -2.7096  | -0.14908 | -1.43359 |
| 1  | 0 | -4.77477 | 1.8304   | -4.38769 | 6     | 0 | -2.41943 | 3.4683   | 1.00052  |

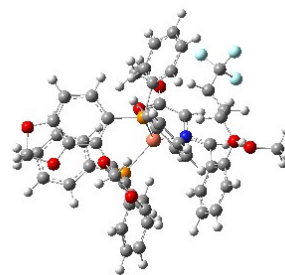

TS *endo*-2a-MeOH

E(B97D3/BS1) = -3880.26894186

H(correction)= 0.917835

G(correction)= 0.751053

E(B97D3/BS2)<sub>CH<sub>2</sub>Cl<sub>2</sub></sub> = -3881.26337672

Imaginary frequencies: 1 (-307.2688 cm<sup>-1</sup>)

|    |   |          |          |          |       |   |          |          |          |
|----|---|----------|----------|----------|-------|---|----------|----------|----------|
| 8  | 0 | -3.25987 | 4.53926  | -1.08023 | 6     | 0 | 2.70565  | -2.79551 | -3.17785 |
| 6  | 0 | -3.57272 | 3.99264  | -2.37862 | 1     | 0 | 0.99578  | -2.85511 | -1.86519 |
| 6  | 0 | -2.10878 | 2.21332  | 1.56351  | 6     | 0 | 0.40108  | 3.98036  | -1.28461 |
| 15 | 0 | -1.64539 | -0.55862 | 1.59029  | 1     | 0 | 0.62099  | 2.31274  | 0.07021  |
| 6  | 0 | -1.53741 | -0.73137 | -2.02523 | 6     | 0 | -0.29169 | 3.4211   | -3.5458  |
| 6  | 0 | -3.92376 | -0.69092 | -1.83343 | 1     | 0 | -0.59236 | 1.31439  | -3.94887 |
| 1  | 0 | -2.27426 | 4.392    | 1.55715  | 6     | 0 | 2.63631  | 2.51652  | 1.66172  |
| 1  | 0 | -2.84213 | 4.36454  | -3.11202 | 6     | 0 | 1.35252  | 1.41864  | 3.38773  |
| 1  | 0 | -4.60271 | 4.26787  | -2.64904 | 8     | 0 | 0.968    | -3.09961 | 0.423    |
| 1  | 0 | -1.71382 | 2.18749  | 2.57548  | 8     | 0 | 2.77713  | -4.41165 | 0.86185  |
| 29 | 0 | 0.48063  | -0.81013 | 0.76627  | 1     | 0 | -2.2361  | -0.29421 | 7.29537  |
| 6  | 0 | -1.89675 | -0.39544 | 3.40556  | 1     | 0 | -5.45528 | -4.5648  | 0.03446  |
| 6  | 0 | -2.8988  | -1.82455 | 1.11502  | 6     | 0 | 3.57723  | -1.98335 | -3.91767 |
| 6  | 0 | -1.65443 | -1.79668 | -2.93078 | 1     | 0 | 4.01996  | 0.03642  | -4.5551  |
| 15 | 0 | 0.10838  | -0.12007 | -1.45042 | 1     | 0 | 2.89727  | -3.8657  | -3.09182 |
| 6  | 0 | -4.02679 | -1.76834 | -2.72058 | 6     | 0 | 0.07066  | 4.38027  | -2.58589 |
| 8  | 0 | -5.18067 | -0.29094 | -1.43772 | 1     | 0 | 0.68403  | 4.72031  | -0.53895 |
| 7  | 0 | 2.23198  | -1.01093 | 1.77424  | 1     | 0 | -0.5547  | 3.73087  | -4.55894 |
| 6  | 0 | -0.97585 | -1.08387 | 4.2195   | 6     | 0 | 2.02579  | 3.74083  | 1.9961   |
| 6  | 0 | -2.94781 | 0.32049  | 4.00912  | 8     | 0 | 3.52421  | 2.54246  | 0.60547  |
| 6  | 0 | -2.456   | -2.97561 | 0.4373   | 6     | 0 | 0.72047  | 2.62267  | 3.71089  |
| 6  | 0 | -4.26492 | -1.67395 | 1.41361  | 1     | 0 | 1.10166  | 0.50882  | 3.92908  |
| 6  | 0 | -2.90517 | -2.3416  | -3.29581 | 6     | 0 | 2.10381  | -5.48166 | 0.17759  |
| 1  | 0 | -0.75663 | -2.21555 | -3.38028 | 1     | 0 | 4.44508  | -2.41911 | -4.41327 |
| 6  | 0 | 1.36894  | -0.84288 | -2.57872 | 1     | 0 | 0.09569  | 5.43773  | -2.85163 |
| 6  | 0 | 0.05467  | 1.65585  | -1.90989 | 6     | 0 | 1.07411  | 3.79117  | 3.01763  |
| 8  | 0 | -5.35004 | -2.09581 | -2.91043 | 1     | 0 | 2.28379  | 4.62584  | 1.41608  |
| 6  | 0 | -6.0981  | -1.22411 | -2.03724 | 6     | 0 | 3.60145  | 1.34452  | -0.22587 |
| 6  | 0 | 3.02521  | 0.04413  | 2.10979  | 1     | 0 | 3.40565  | 4.1613   | -0.40325 |
| 6  | 0 | 2.90031  | -2.15115 | 1.48003  | 1     | 0 | -0.0297  | 2.64719  | 4.5027   |
| 6  | 0 | -1.10221 | -1.0543  | 5.61419  | 1     | 0 | 1.95417  | -5.22996 | -0.88145 |
| 1  | 0 | -0.152   | -1.62404 | 3.74897  | 1     | 0 | 2.76815  | -6.34666 | 0.27098  |
| 6  | 0 | -3.06496 | 0.3583   | 5.40416  | 1     | 0 | 1.12907  | -5.69029 | 0.63874  |
| 1  | 0 | -3.65872 | 0.86753  | 3.39086  | 1     | 0 | 0.5996   | 4.74345  | 3.26082  |
| 6  | 0 | -3.37789 | -3.95358 | 0.04336  | 1     | 0 | 2.58865  | 1.07899  | -0.55911 |
| 1  | 0 | -1.39798 | -3.09057 | 0.20827  | 1     | 0 | 4.17396  | 1.69077  | -1.09864 |
| 6  | 0 | -5.17952 | -2.66274 | 1.03428  | 6     | 0 | 4.2489   | 0.17266  | 0.4562   |
| 1  | 0 | -4.6149  | -0.78294 | 1.9333   | 8     | 0 | 3.43471  | 5.10337  | -0.67453 |
| 1  | 0 | -2.98354 | -3.1688  | -3.99898 | 6     | 0 | 4.1553   | -1.1002  | -0.16368 |
| 6  | 0 | 2.24285  | -0.03539 | -3.33244 | 1     | 0 | 5.20727  | 0.41508  | 0.92583  |
| 6  | 0 | 1.61712  | -2.23171 | -2.50456 | 6     | 0 | 4.64697  | 5.6249   | -0.14354 |
| 6  | 0 | 0.39037  | 2.62212  | -0.94681 | 1     | 0 | 3.4226   | -1.24901 | -0.95162 |
| 6  | 0 | -0.30717 | 2.06259  | -3.20871 | 6     | 0 | 5.34633  | -1.96742 | -0.29778 |
| 1  | 0 | -6.57018 | -1.8262  | -1.24586 | 1     | 0 | 5.54254  | 5.14787  | -0.58536 |
| 1  | 0 | -6.84257 | -0.67125 | -2.628   | 1     | 0 | 4.67467  | 6.69618  | -0.38715 |
| 6  | 0 | 2.33359  | 1.34008  | 2.37825  | 1     | 0 | 4.70996  | 5.51779  | 0.95596  |
| 1  | 0 | 3.8788   | -0.16186 | 2.77368  | 9     | 0 | 6.05599  | -2.0781  | 0.87264  |
| 6  | 0 | 2.12005  | -3.22477 | 0.88742  | 9     | 0 | 5.02352  | -3.23515 | -0.69875 |
| 1  | 0 | 3.81499  | -2.42669 | 2.00915  | 9     | 0 | 6.25513  | -1.5112  | -1.23491 |
| 6  | 0 | -2.14359 | -0.32816 | 6.2089   | ----- |   |          |          |          |
| 1  | 0 | -0.38026 | -1.58696 | 6.23483  |       |   |          |          |          |
| 1  | 0 | -3.87727 | 0.92387  | 5.86363  |       |   |          |          |          |
| 6  | 0 | -4.73913 | -3.80054 | 0.34025  |       |   |          |          |          |
| 1  | 0 | -3.03184 | -4.83367 | -0.5003  |       |   |          |          |          |
| 1  | 0 | -6.23703 | -2.54483 | 1.27814  |       |   |          |          |          |
| 6  | 0 | 3.34088  | -0.60526 | -3.99183 |       |   |          |          |          |
| 1  | 0 | 2.08306  | 1.03995  | -3.38604 |       |   |          |          |          |

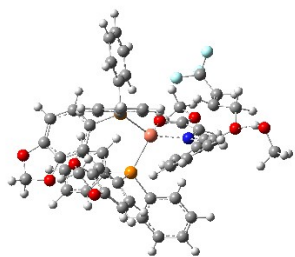

TS *exo*-2a-MeOH

E(B97D3/BS1) = -3880.25764319

H(correction)= 0.917402

G(correction)= 0.747658

E(B97D3/BS2)<sub>CH<sub>2</sub>Cl<sub>2</sub></sub> = -3881.2557757

Imaginary frequencies: 1 (-430.5482cm<sup>-1</sup>)

|    |   |          |          |          |   |   |          |          |          |
|----|---|----------|----------|----------|---|---|----------|----------|----------|
| 6  | 0 | -2.36635 | 3.05079  | -0.49692 | 7 | 0 | 2.16751  | -0.88853 | 1.35031  |
| 6  | 0 | -2.3282  | 1.74426  | -0.02477 | 6 | 0 | -0.08381 | -1.57029 | -4.2383  |
| 6  | 0 | -1.88561 | 4.14764  | 0.23201  | 6 | 0 | -0.18001 | -3.10805 | -2.35379 |
| 8  | 0 | -2.90166 | 3.49208  | -1.68939 | 6 | 0 | 1.29431  | 1.53422  | -2.45046 |
| 6  | 0 | -1.77576 | 1.5723   | 1.29008  | 6 | 0 | -0.91912 | 1.76732  | -3.43107 |
| 6  | 0 | -3.00279 | 0.6636   | -0.80676 | 1 | 0 | -7.0933  | 0.81991  | 0.53869  |
| 6  | 0 | -1.37755 | 3.99812  | 1.51183  | 1 | 0 | -7.09437 | 1.82662  | -0.97591 |
| 8  | 0 | -2.0646  | 5.30551  | -0.49341 | 6 | 0 | -0.19523 | 0.41102  | 6.33379  |
| 6  | 0 | -2.47183 | 4.86105  | -1.8049  | 1 | 0 | 1.79918  | 0.70359  | 5.53761  |
| 6  | 0 | -1.32473 | 2.68317  | 2.02258  | 1 | 0 | -2.27395 | 0.04902  | 6.82203  |
| 15 | 0 | -1.3988  | -0.13677 | 1.8698   | 6 | 0 | -5.45525 | -2.38909 | 1.69532  |
| 6  | 0 | -2.36485 | -0.34373 | -1.59896 | 1 | 0 | -4.28945 | -4.02488 | 0.88748  |
| 6  | 0 | -4.39366 | 0.62899  | -0.78841 | 1 | 0 | -6.34879 | -0.59311 | 2.51368  |
| 1  | 0 | -1.023   | 4.84896  | 2.09047  | 6 | 0 | 3.23324  | -0.04189 | 1.28829  |
| 1  | 0 | -1.60988 | 4.91211  | -2.49153 | 6 | 0 | 2.50694  | -2.13619 | 1.73684  |
| 1  | 0 | -3.31217 | 5.47504  | -2.15016 | 6 | 0 | 0.10254  | -2.65361 | -5.10698 |
| 1  | 0 | -0.89815 | 2.528    | 3.01152  | 1 | 0 | -0.11416 | -0.55476 | -4.63172 |
| 6  | 0 | -0.98577 | 0.05947  | 3.65298  | 6 | 0 | -0.0063  | -4.18644 | -3.22811 |
| 6  | 0 | -3.01939 | -0.9973  | 1.84205  | 1 | 0 | -0.24578 | -3.27738 | -1.2799  |
| 6  | 0 | -3.13658 | -1.30904 | -2.26956 | 6 | 0 | 1.72994  | 2.6592   | -3.16051 |
| 15 | 0 | -0.52057 | -0.42916 | -1.65855 | 1 | 0 | 1.9751   | 1.02056  | -1.77387 |
| 6  | 0 | -5.14835 | -0.35047 | -1.44081 | 6 | 0 | -0.48123 | 2.89477  | -4.13767 |
| 8  | 0 | -5.2331  | 1.48522  | -0.10735 | 1 | 0 | -1.94819 | 1.42501  | -3.52875 |
| 6  | 0 | 0.36468  | 0.31437  | 3.97248  | 1 | 0 | 0.10895  | 0.54726  | 7.37269  |
| 6  | 0 | -1.93034 | -0.03934 | 4.69174  | 1 | 0 | -6.40309 | -2.92503 | 1.62936  |
| 6  | 0 | -3.05035 | -2.31822 | 1.35775  | 6 | 0 | 3.11565  | 1.35401  | 0.83528  |
| 6  | 0 | -4.21512 | -0.37602 | 2.25046  | 1 | 0 | 4.00487  | -0.18365 | 2.06223  |
| 6  | 0 | -4.54439 | -1.34168 | -2.19492 | 6 | 0 | 1.52137  | -3.18982 | 1.57127  |
| 1  | 0 | -2.63576 | -2.06435 | -2.86949 | 1 | 0 | 3.31549  | -2.30862 | 2.45085  |
| 29 | 0 | 0.34287  | -0.81442 | 0.42697  | 6 | 0 | 0.13658  | -3.96208 | -4.60501 |
| 6  | 0 | -0.22752 | -1.79307 | -2.85718 | 1 | 0 | 0.22235  | -2.47437 | -6.17667 |
| 6  | 0 | -0.03133 | 1.08128  | -2.58126 | 1 | 0 | 0.04029  | -5.20137 | -2.83035 |
| 8  | 0 | -6.48837 | -0.15595 | -1.19528 | 6 | 0 | 0.84206  | 3.34299  | -4.00279 |
| 6  | 0 | -6.57129 | 1.0448   | -0.40176 | 1 | 0 | 2.7539   | 3.00896  | -3.03314 |
| 6  | 0 | 0.75273  | 0.50066  | 5.30482  | 1 | 0 | -1.17326 | 3.41998  | -4.79878 |
| 1  | 0 | 1.10848  | 0.34709  | 3.17786  | 6 | 0 | 4.31584  | 1.95712  | 0.38894  |
| 6  | 0 | -1.53401 | 0.13256  | 6.0243   | 6 | 0 | 1.92769  | 2.09949  | 0.75712  |
| 1  | 0 | -2.9711  | -0.26226 | 4.46255  | 8 | 0 | 0.44138  | -3.06948 | 0.95807  |
| 6  | 0 | -4.26775 | -3.00733 | 1.28029  | 8 | 0 | 1.89675  | -4.35889 | 2.14616  |
| 1  | 0 | -2.1219  | -2.79052 | 1.03488  | 1 | 0 | 0.28567  | -4.80338 | -5.2836  |
| 6  | 0 | -5.42576 | -1.07526 | 2.18664  | 1 | 0 | 1.17918  | 4.22329  | -4.55259 |
| 1  | 0 | -4.19822 | 0.6618   | 2.58285  | 6 | 0 | 4.33178  | 3.27013  | -0.10183 |
| 1  | 0 | -5.12587 | -2.10585 | -2.70727 | 8 | 0 | 5.51728  | 1.28245  | 0.49521  |
|    |   |          |          |          | 6 | 0 | 1.93314  | 3.4137   | 0.27587  |
|    |   |          |          |          | 1 | 0 | 0.99229  | 1.64528  | 1.07793  |
|    |   |          |          |          | 6 | 0 | 1.04449  | -5.48372 | 1.86293  |
|    |   |          |          |          | 6 | 0 | 3.13544  | 3.9995   | -0.14406 |
|    |   |          |          |          | 1 | 0 | 5.27827  | 3.69674  | -0.43376 |
|    |   |          |          |          | 6 | 0 | 5.62052  | -0.12143 | 0.05099  |
|    |   |          |          |          | 1 | 0 | 6.99779  | 2.39511  | 0.09513  |
|    |   |          |          |          | 1 | 0 | 0.99895  | 3.96992  | 0.22602  |
|    |   |          |          |          | 1 | 0 | 1.02321  | -5.67674 | 0.7822   |
|    |   |          |          |          | 1 | 0 | 1.49499  | -6.32811 | 2.39441  |
|    |   |          |          |          | 1 | 0 | 0.02324  | -5.30092 | 2.22282  |
|    |   |          |          |          | 1 | 0 | 3.1452   | 5.02346  | -0.52093 |
|    |   |          |          |          | 1 | 0 | 6.18823  | -0.08935 | -0.89204 |
|    |   |          |          |          | 1 | 0 | 6.243    | -0.6067  | 0.81535  |

|   |   |         |          |          |
|---|---|---------|----------|----------|
| 6 | 0 | 4.3225  | -0.86026 | -0.1391  |
| 8 | 0 | 7.63142 | 3.13774  | 0.00021  |
| 6 | 0 | 4.28588 | -2.26415 | 0.06888  |
| 1 | 0 | 3.74641 | -0.51059 | -0.99961 |
| 6 | 0 | 7.73555 | 3.72433  | 1.29014  |
| 1 | 0 | 5.06506 | -2.75068 | 0.65734  |
| 6 | 0 | 3.67252 | -3.1369  | -0.95566 |
| 1 | 0 | 8.16435 | 3.03151  | 2.04039  |
| 1 | 0 | 8.40838 | 4.58907  | 1.20226  |
| 1 | 0 | 6.76109 | 4.08276  | 1.67449  |
| 9 | 0 | 3.31064 | -4.37141 | -0.47777 |
| 9 | 0 | 2.55711 | -2.57432 | -1.51496 |
| 9 | 0 | 4.51976 | -3.40694 | -2.01555 |

-----

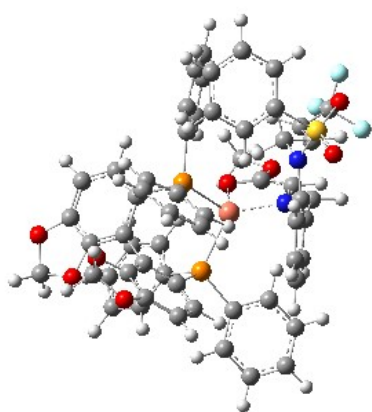

TS endo 7a

E(B3LYPD3/BS1) = -4525.79276737

H(correction)= 0.989597

G(correction)= 0.819963

E(M06/BS2)<sub>CH<sub>2</sub>Cl<sub>2</sub></sub> = -4524.48599154

Imaginary frequencies: 1 (-366.1169 cm<sup>-1</sup>)

|    |   |         |          |          |
|----|---|---------|----------|----------|
| 6  | 0 | 3.04595 | -2.96633 | 0.61191  |
| 6  | 0 | 2.93287 | -1.62959 | 0.27315  |
| 6  | 0 | 2.94009 | -3.438   | 1.91736  |
| 8  | 0 | 3.21395 | -4.02135 | -0.24842 |
| 6  | 0 | 2.77364 | -0.71993 | 1.36535  |
| 6  | 0 | 2.97641 | -1.2621  | -1.17554 |
| 6  | 0 | 2.73315 | -2.5806  | 2.97586  |
| 8  | 0 | 3.03769 | -4.8049  | 1.92894  |
| 6  | 0 | 3.22448 | -5.20093 | 0.56284  |
| 6  | 0 | 2.65585 | -1.20924 | 2.67233  |
| 15 | 0 | 2.47784 | 1.05918  | 1.00212  |
| 6  | 0 | 1.83666 | -0.92822 | -1.97461 |
| 6  | 0 | 4.1862  | -1.31106 | -1.84237 |
| 1  | 0 | 2.62816 | -2.94587 | 3.99126  |
| 1  | 0 | 2.3985  | -5.85358 | 0.26073  |
| 1  | 0 | 4.19221 | -5.70627 | 0.45862  |
| 1  | 0 | 2.48725 | -0.5148  | 3.48707  |
| 29 | 0 | 0.30815 | 1.20724  | 0.15128  |
| 6  | 0 | 2.80305 | 1.97556  | 2.56065  |
| 6  | 0 | 3.87525 | 1.5338   | -0.09972 |
| 6  | 0 | 1.98964 | -0.64045 | -3.33416 |
| 15 | 0 | 0.20397 | -0.72684 | -1.13656 |

|   |   |          |          |          |
|---|---|----------|----------|----------|
| 6 | 0 | 4.32797  | -1.00672 | -3.19436 |
| 8 | 0 | 5.40858  | -1.6356  | -1.31145 |
| 7 | 0 | -1.09168 | 2.46369  | 0.95514  |
| 8 | 0 | 0.4007   | 2.96206  | -1.33398 |
| 6 | 0 | 1.90947  | 3.01773  | 2.85491  |
| 6 | 0 | 3.88811  | 1.74     | 3.42048  |
| 6 | 0 | 3.56817  | 2.22228  | -1.28287 |
| 6 | 0 | 5.21115  | 1.22209  | 0.19233  |
| 6 | 0 | 3.2431   | -0.66803 | -3.97319 |
| 1 | 0 | 1.11722  | -0.38664 | -3.92561 |
| 6 | 0 | -1.06461 | -0.5785  | -2.45729 |
| 6 | 0 | -0.06548 | -2.37075 | -0.37113 |
| 8 | 0 | 5.64269  | -1.12264 | -3.56195 |
| 6 | 0 | 6.36193  | -1.43754 | -2.36142 |
| 6 | 0 | -2.13824 | 2.09661  | 1.72643  |
| 6 | 0 | -1.25063 | 3.6052   | 0.25689  |
| 6 | 0 | -0.3481  | 3.83099  | -0.84399 |
| 6 | 0 | 2.09902  | 3.81158  | 3.98867  |
| 1 | 0 | 1.05984  | 3.18936  | 2.19837  |
| 6 | 0 | 4.07038  | 2.52938  | 4.55552  |
| 1 | 0 | 4.57929  | 0.92823  | 3.21524  |
| 6 | 0 | 4.58841  | 2.5863   | -2.16416 |
| 1 | 0 | 2.53363  | 2.45836  | -1.51148 |
| 6 | 0 | 6.22804  | 1.60398  | -0.68201 |
| 1 | 0 | 5.45713  | 0.6616   | 1.08874  |
| 1 | 0 | 3.35047  | -0.43956 | -5.02766 |
| 6 | 0 | -2.04238 | -1.55253 | -2.7026  |
| 6 | 0 | -1.15887 | 0.66608  | -3.10859 |
| 6 | 0 | -0.37627 | -2.42449 | 0.9927   |
| 6 | 0 | 0.08835  | -3.56466 | -1.09425 |
| 1 | 0 | 7.0155   | -0.59701 | -2.10165 |
| 1 | 0 | 6.93353  | -2.35963 | -2.51131 |
| 6 | 0 | -1.97937 | 0.84419  | 2.53269  |
| 1 | 0 | -2.70567 | 2.88952  | 2.22419  |
| 1 | 0 | -1.80921 | 4.45067  | 0.64857  |
| 8 | 0 | -0.39914 | 5.07726  | -1.34891 |
| 6 | 0 | 3.17751  | 3.56742  | 4.8402   |
| 1 | 0 | 1.39953  | 4.61387  | 4.20717  |
| 1 | 0 | 4.90969  | 2.336    | 5.21839  |
| 6 | 0 | 5.91762  | 2.28038  | -1.86615 |
| 1 | 0 | 4.34231  | 3.10469  | -3.08699 |
| 1 | 0 | 7.26222  | 1.36823  | -0.44302 |
| 6 | 0 | -3.09029 | -1.29174 | -3.5889  |
| 1 | 0 | -2.01947 | -2.50138 | -2.1807  |
| 6 | 0 | -2.1924  | 0.91086  | -4.01188 |
| 1 | 0 | -0.45083 | 1.4546   | -2.86761 |
| 6 | 0 | -0.54299 | -3.65714 | 1.62699  |
| 1 | 0 | -0.46254 | -1.50485 | 1.56081  |
| 6 | 0 | -0.0939  | -4.79449 | -0.46254 |
| 1 | 0 | 0.36223  | -3.52843 | -2.14487 |
| 6 | 0 | -2.79395 | -0.29897 | 2.36947  |
| 6 | 0 | -0.95841 | 0.80679  | 3.49878  |
| 6 | 0 | 0.37718  | 5.30856  | -2.52868 |
| 1 | 0 | 3.32268  | 4.18065  | 5.72554  |
| 1 | 0 | 6.71025  | 2.56674  | -2.55246 |
| 6 | 0 | -3.16455 | -0.06542 | -4.25036 |
| 1 | 0 | -3.85467 | -2.04797 | -3.742   |



|    |   |          |          |          |
|----|---|----------|----------|----------|
| 1  | 0 | -2.25717 | 1.8772   | -4.50482 |
| 6  | 0 | -0.40732 | -4.84219 | 0.90112  |
| 1  | 0 | -0.77219 | -3.68127 | 2.68709  |
| 1  | 0 | 0.01926  | -5.71536 | -1.02943 |
| 6  | 0 | -2.62274 | -1.39521 | 3.2364   |
| 7  | 0 | -3.67745 | -0.37432 | 1.25706  |
| 6  | 0 | -0.77429 | -0.28912 | 4.33604  |
| 1  | 0 | -0.3134  | 1.67425  | 3.59127  |
| 1  | 0 | 0.05779  | 4.64543  | -3.33925 |
| 1  | 0 | 0.19491  | 6.34936  | -2.79878 |
| 1  | 0 | 1.44193  | 5.14459  | -2.33463 |
| 1  | 0 | -3.98487 | 0.13852  | -4.93296 |
| 1  | 0 | -0.53533 | -5.80094 | 1.39649  |
| 6  | 0 | -1.6376  | -1.38119 | 4.21754  |
| 1  | 0 | -3.26178 | -2.26111 | 3.13296  |
| 6  | 0 | -3.39147 | 0.41994  | 0.04598  |
| 16 | 0 | -5.21995 | -1.06146 | 1.28671  |
| 1  | 0 | 0.01615  | -0.2822  | 5.08142  |
| 1  | 0 | -1.53145 | -2.24071 | 4.87462  |
| 1  | 0 | -2.35411 | 0.22389  | -0.23621 |
| 1  | 0 | -4.0156  | 0.02805  | -0.76341 |
| 6  | 0 | -3.59961 | 1.89745  | 0.25207  |
| 8  | 0 | -5.42474 | -1.68875 | 2.59363  |
| 8  | 0 | -6.1924  | -0.09475 | 0.76833  |
| 6  | 0 | -5.03015 | -2.34067 | 0.03042  |
| 6  | 0 | -3.24071 | 2.78934  | -0.76255 |
| 1  | 0 | -4.47213 | 2.14349  | 0.85375  |
| 6  | 0 | -3.954   | -3.22724 | 0.11427  |
| 6  | 0 | -5.96826 | -2.42668 | -0.99737 |
| 1  | 0 | -2.72673 | 2.43825  | -1.65032 |
| 6  | 0 | -3.97776 | 4.05737  | -0.94206 |
| 6  | 0 | -3.81935 | -4.22193 | -0.85278 |
| 1  | 0 | -3.21456 | -3.12646 | 0.90096  |
| 6  | 0 | -5.82497 | -3.42859 | -1.96072 |
| 1  | 0 | -6.7811  | -1.70985 | -1.04021 |
| 9  | 0 | -4.24648 | 4.66454  | 0.24934  |
| 9  | 0 | -3.28487 | 4.94841  | -1.70016 |
| 9  | 0 | -5.1865  | 3.91286  | -1.56286 |
| 6  | 0 | -4.7541  | -4.32281 | -1.88925 |
| 1  | 0 | -2.97624 | -4.90381 | -0.7997  |
| 1  | 0 | -6.54818 | -3.50564 | -2.76776 |
| 1  | 0 | -4.64427 | -5.09745 | -2.64346 |

E(M06/BS2)<sub>CH<sub>2</sub>Cl<sub>2</sub></sub> = -4524.48143675  
 Imaginary frequencies: 1 (-390.093 cm<sup>-1</sup>)

|    |   |          |          |          |
|----|---|----------|----------|----------|
| 6  | 0 | 3.2383   | -2.41383 | -1.91953 |
| 6  | 0 | 3.12607  | -1.59522 | -0.81046 |
| 6  | 0 | 2.64702  | -3.67373 | -2.0077  |
| 8  | 0 | 3.95406  | -2.16496 | -3.06627 |
| 6  | 0 | 2.3661   | -2.1229  | 0.28145  |
| 6  | 0 | 3.92459  | -0.33209 | -0.77188 |
| 6  | 0 | 1.92732  | -4.20406 | -0.95901 |
| 8  | 0 | 2.95319  | -4.24607 | -3.21617 |
| 6  | 0 | 3.58064  | -3.20488 | -3.97696 |
| 6  | 0 | 1.79256  | -3.39704 | 0.18594  |
| 15 | 0 | 1.90635  | -1.01686 | 1.68409  |
| 6  | 0 | 3.44218  | 0.99892  | -0.94749 |
| 6  | 0 | 5.28564  | -0.45826 | -0.55488 |
| 1  | 0 | 1.48262  | -5.19144 | -1.01461 |
| 1  | 0 | 2.86447  | -2.80561 | -4.708   |
| 1  | 0 | 4.47649  | -3.59972 | -4.46267 |
| 1  | 0 | 1.20837  | -3.77874 | 1.01563  |
| 29 | 0 | 0.45971  | 0.58772  | 0.7258   |
| 6  | 0 | 1.20426  | -2.15025 | 2.94884  |
| 6  | 0 | 3.49401  | -0.41702 | 2.37725  |
| 6  | 0 | 4.33015  | 2.07981  | -0.86183 |
| 15 | 0 | 1.63189  | 1.30784  | -1.13823 |
| 6  | 0 | 6.15232  | 0.62502  | -0.45118 |
| 8  | 0 | 5.9789   | -1.62485 | -0.33869 |
| 7  | 0 | -1.52101 | 0.41478  | 1.32454  |
| 8  | 0 | 0.36593  | 2.28574  | 2.22218  |
| 6  | 0 | -0.19567 | -2.19737 | 3.04327  |
| 6  | 0 | 1.97611  | -2.97229 | 3.78534  |
| 6  | 0 | 3.5427   | 0.92501  | 2.78377  |
| 6  | 0 | 4.644    | -1.2148  | 2.48145  |
| 6  | 0 | 5.70172  | 1.91798  | -0.60144 |
| 1  | 0 | 3.95287  | 3.08628  | -0.99442 |
| 6  | 0 | 1.55573  | 3.11061  | -1.48534 |
| 6  | 0 | 1.18928  | 0.51222  | -2.73058 |
| 8  | 0 | 7.41839  | 0.18441  | -0.16422 |
| 6  | 0 | 7.35208  | -1.24673 | -0.19834 |
| 6  | 0 | -2.61754 | -0.19822 | 0.8044   |
| 6  | 0 | -1.84811 | 1.39677  | 2.17732  |
| 6  | 0 | -0.80763 | 2.29531  | 2.63006  |
| 6  | 0 | -0.81453 | -3.06776 | 3.94274  |
| 1  | 0 | -0.7943  | -1.54236 | 2.41903  |
| 6  | 0 | 1.35488  | -3.83296 | 4.68999  |
| 1  | 0 | 3.05962  | -2.93503 | 3.73984  |
| 6  | 0 | 4.72801  | 1.45731  | 3.2953   |
| 1  | 0 | 2.65656  | 1.54707  | 2.68045  |
| 6  | 0 | 5.82386  | -0.67891 | 2.99688  |
| 1  | 0 | 4.62905  | -2.2374  | 2.11615  |
| 1  | 0 | 6.37059  | 2.76736  | -0.51989 |
| 6  | 0 | 1.75398  | 3.65     | -2.76428 |
| 6  | 0 | 1.29828  | 3.96896  | -0.40565 |
| 6  | 0 | -0.14852 | 0.1286   | -2.89952 |
| 6  | 0 | 2.10823  | 0.28307  | -3.76503 |
| 1  | 0 | 7.74522  | -1.64894 | 0.74045  |
| 1  | 0 | 7.92417  | -1.61993 | -1.05856 |

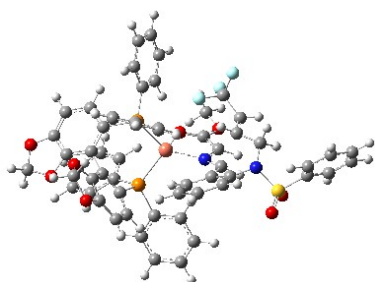

TS exo 7a

E(B3LYPD3/BS1) = -4525.78359043  
 H(correction) = 0.989114  
 G(correction) = 0.814031

|    |   |          |          |          |
|----|---|----------|----------|----------|
| 6  | 0 | -2.54516 | -1.26275 | -0.21187 |
| 1  | 0 | -3.45996 | -0.32097 | 1.49207  |
| 1  | 0 | -2.76479 | 1.36506  | 2.76103  |
| 8  | 0 | -1.23537 | 3.18527  | 3.54166  |
| 6  | 0 | -0.0404  | -3.88685 | 4.76603  |
| 1  | 0 | -1.89917 | -3.09786 | 3.99996  |
| 1  | 0 | 1.96017  | -4.463   | 5.33661  |
| 6  | 0 | 5.86759  | 0.65786  | 3.40352  |
| 1  | 0 | 4.76362  | 2.50024  | 3.59858  |
| 1  | 0 | 6.7119   | -1.30124 | 3.07536  |
| 6  | 0 | 1.69936  | 5.03096  | -2.95885 |
| 1  | 0 | 1.94175  | 2.99491  | -3.60958 |
| 6  | 0 | 1.25025  | 5.34848  | -0.60437 |
| 1  | 0 | 1.1039   | 3.55203  | 0.57709  |
| 6  | 0 | -0.56672 | -0.47833 | -4.08366 |
| 1  | 0 | -0.8541  | 0.2881   | -2.09079 |
| 6  | 0 | 1.68609  | -0.31585 | -4.95343 |
| 1  | 0 | 3.15103  | 0.55406  | -3.63358 |
| 6  | 0 | -3.74628 | -1.52566 | -0.90705 |
| 6  | 0 | -1.39123 | -1.95583 | -0.59407 |
| 6  | 0 | -0.31341 | 4.23096  | 3.87047  |
| 1  | 0 | -0.52025 | -4.56168 | 5.46996  |
| 1  | 0 | 6.79154  | 1.07635  | 3.79349  |
| 6  | 0 | 1.45015  | 5.88209  | -1.87938 |
| 1  | 0 | 1.84675  | 5.44121  | -3.9545  |
| 1  | 0 | 1.03345  | 6.00427  | 0.2346   |
| 6  | 0 | 0.35089  | -0.70024 | -5.11309 |
| 1  | 0 | -1.60032 | -0.79483 | -4.18628 |
| 1  | 0 | 2.40137  | -0.48253 | -5.75525 |
| 6  | 0 | -3.78732 | -2.46978 | -1.93319 |
| 7  | 0 | -4.93875 | -0.80218 | -0.55668 |
| 6  | 0 | -1.43267 | -2.90329 | -1.6163  |
| 1  | 0 | -0.45483 | -1.75372 | -0.08815 |
| 1  | 0 | -0.09969 | 4.83307  | 2.98175  |
| 1  | 0 | -0.81481 | 4.83634  | 4.62656  |
| 1  | 0 | 0.6212   | 3.82152  | 4.26477  |
| 1  | 0 | 1.40107  | 6.95671  | -2.03468 |
| 1  | 0 | 0.0289   | -1.17473 | -6.03647 |
| 6  | 0 | -2.63079 | -3.16698 | -2.28488 |
| 1  | 0 | -4.73059 | -2.65498 | -2.43576 |
| 6  | 0 | -4.88008 | 0.6839   | -0.36475 |
| 16 | 0 | -6.00272 | -1.60878 | 0.49745  |
| 1  | 0 | -0.52227 | -3.42726 | -1.89    |
| 1  | 0 | -2.66514 | -3.90843 | -3.07825 |
| 1  | 0 | -5.37799 | 1.13658  | -1.23046 |
| 1  | 0 | -5.46681 | 0.93779  | 0.52266  |
| 6  | 0 | -3.48435 | 1.25461  | -0.21432 |
| 8  | 0 | -5.97276 | -3.02605 | 0.12881  |
| 8  | 0 | -5.7792  | -1.21203 | 1.89978  |
| 6  | 0 | -7.56609 | -0.88505 | -0.01051 |
| 6  | 0 | -3.2945  | 2.45602  | 0.49895  |
| 1  | 0 | -2.8892  | 1.16341  | -1.12082 |
| 6  | 0 | -7.96064 | -0.9858  | -1.34691 |
| 6  | 0 | -8.37317 | -0.27059 | 0.94619  |
| 1  | 0 | -4.06073 | 2.85222  | 1.15792  |
| 6  | 0 | -2.37058 | 3.46786  | -0.04894 |
| 6  | 0 | -9.18952 | -0.45173 | -1.72955 |

|   |   |           |          |          |
|---|---|-----------|----------|----------|
| 1 | 0 | -7.3072   | -1.4643  | -2.06901 |
| 6 | 0 | -9.60402  | 0.25848  | 0.55153  |
| 1 | 0 | -8.03083  | -0.20895 | 1.97352  |
| 9 | 0 | -2.96371  | 4.32917  | -0.93408 |
| 9 | 0 | -1.811    | 4.28303  | 0.89531  |
| 9 | 0 | -1.34281  | 2.89068  | -0.73299 |
| 6 | 0 | -10.01006 | 0.16882  | -0.78135 |
| 1 | 0 | -9.50761  | -0.51786 | -2.7661  |
| 1 | 0 | -10.24222 | 0.74224  | 1.28541  |
| 1 | 0 | -10.96671 | 0.58502  | -1.08494 |

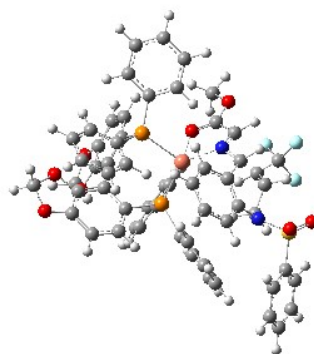

TS *endo* ent-7a

E(B3LYP/BS1) = -4525.78438157

H(correction) = 0.989273

G(correction) = 0.817706

E(M06/BS2)<sub>CH<sub>2</sub>Cl<sub>2</sub></sub> = -4524.48218943

Imaginary frequencies: 1 (-356.7888 cm<sup>-1</sup>)

|    |   |          |          |          |
|----|---|----------|----------|----------|
| 6  | 0 | 3.86107  | -2.90387 | 0.11047  |
| 6  | 0 | 3.0256   | -1.89216 | 0.5448   |
| 6  | 0 | 3.41752  | -4.18837 | -0.19314 |
| 8  | 0 | 5.21341  | -2.81992 | -0.1048  |
| 6  | 0 | 1.64703  | -2.23954 | 0.70122  |
| 6  | 0 | 3.62958  | -0.56906 | 0.88667  |
| 6  | 0 | 2.0961   | -4.54422 | -0.03764 |
| 8  | 0 | 4.46893  | -4.95699 | -0.61715 |
| 6  | 0 | 5.60803  | -4.08457 | -0.64717 |
| 6  | 0 | 1.22028  | -3.54199 | 0.41924  |
| 15 | 0 | 0.44757  | -0.89919 | 1.14     |
| 6  | 0 | 3.59724  | 0.60039  | 0.06772  |
| 6  | 0 | 4.31088  | -0.45292 | 2.08534  |
| 1  | 0 | 1.74766  | -5.54731 | -0.25683 |
| 1  | 0 | 5.93044  | -3.94828 | -1.68603 |
| 1  | 0 | 6.40805  | -4.51058 | -0.03236 |
| 1  | 0 | 0.17829  | -3.80462 | 0.55412  |
| 29 | 0 | 0.38555  | 0.75608  | -0.48765 |
| 6  | 0 | -1.15109 | -1.75549 | 1.4442   |
| 6  | 0 | 1.01679  | -0.36382 | 2.80152  |
| 6  | 0 | 4.1761   | 1.79072  | 0.52384  |
| 15 | 0 | 2.53114  | 0.6089   | -1.43077 |
| 6  | 0 | 4.88814  | 0.7355   | 2.52383  |
| 8  | 0 | 4.51059  | -1.43653 | 3.02176  |
| 7  | 0 | -1.00263 | 2.05201  | -1.25832 |
| 6  | 0 | -1.82016 | -2.32671 | 0.34557  |
| 6  | 0 | -1.79497 | -1.73011 | 2.6905   |

|   |   |          |          |          |
|---|---|----------|----------|----------|
| 6 | 0 | 1.1344   | 1.00753  | 3.06623  |
| 6 | 0 | 1.34729  | -1.29592 | 3.7984   |
| 6 | 0 | 4.83448  | 1.88321  | 1.7624   |
| 1 | 0 | 4.09924  | 2.68416  | -0.08347 |
| 6 | 0 | 3.06543  | 2.05658  | -2.42291 |
| 6 | 0 | 3.03244  | -0.87153 | -2.40143 |
| 8 | 0 | 5.47099  | 0.54628  | 3.74989  |
| 6 | 0 | 5.15869  | -0.80161 | 4.12989  |
| 6 | 0 | -2.21266 | 1.6898   | -1.7421  |
| 6 | 0 | -0.96059 | 3.27886  | -0.70345 |
| 6 | 0 | -3.08168 | -2.89653 | 0.50697  |
| 1 | 0 | -1.37173 | -2.29961 | -0.64435 |
| 6 | 0 | -3.0743  | -2.27183 | 2.83594  |
| 1 | 0 | -1.30884 | -1.27552 | 3.54664  |
| 6 | 0 | 1.57003  | 1.44029  | 4.32075  |
| 1 | 0 | 0.92185  | 1.72737  | 2.28233  |
| 6 | 0 | 1.76445  | -0.85797 | 5.0547   |
| 1 | 0 | 1.28079  | -2.35941 | 3.58681  |
| 1 | 0 | 5.27471  | 2.81291  | 2.10535  |
| 6 | 0 | 4.4008   | 2.36729  | -2.72827 |
| 6 | 0 | 2.04194  | 2.88897  | -2.90138 |
| 6 | 0 | 2.01103  | -1.7742  | -2.73104 |
| 6 | 0 | 4.34802  | -1.15333 | -2.797   |
| 1 | 0 | 4.4749   | -0.78672 | 4.98651  |
| 1 | 0 | 6.08513  | -1.33681 | 4.36356  |
| 6 | 0 | -2.32472 | 0.31507  | -2.30362 |
| 1 | 0 | -2.80208 | 2.44223  | -2.2751  |
| 6 | 0 | 0.24082  | 3.63524  | 0.02478  |
| 1 | 0 | -1.56657 | 4.09728  | -1.08675 |
| 6 | 0 | -3.71795 | -2.86395 | 1.74941  |
| 1 | 0 | -3.58399 | -3.33278 | -0.34912 |
| 1 | 0 | -3.56769 | -2.22689 | 3.80329  |
| 6 | 0 | 1.87871  | 0.51203  | 5.31657  |
| 1 | 0 | 1.67084  | 2.50431  | 4.51614  |
| 1 | 0 | 2.0065   | -1.58371 | 5.8271   |
| 6 | 0 | 4.70295  | 3.48425  | -3.50629 |
| 1 | 0 | 5.20636  | 1.75424  | -2.3359  |
| 6 | 0 | 2.34744  | 4.00624  | -3.68189 |
| 1 | 0 | 1.01008  | 2.66498  | -2.64456 |
| 6 | 0 | 2.29546  | -2.93976 | -3.44288 |
| 1 | 0 | 0.99699  | -1.56811 | -2.40292 |
| 6 | 0 | 4.62998  | -2.31189 | -3.52141 |
| 1 | 0 | 5.15634  | -0.48202 | -2.52648 |
| 6 | 0 | -3.42062 | -0.5175  | -2.00945 |
| 6 | 0 | -1.31788 | -0.18346 | -3.14984 |
| 8 | 0 | 1.07665  | 2.82167  | 0.44714  |
| 8 | 0 | 0.37082  | 4.95681  | 0.23449  |
| 1 | 0 | -4.71609 | -3.27509 | 1.85826  |
| 1 | 0 | 2.21187  | 0.85198  | 6.29375  |
| 6 | 0 | 3.67635  | 4.3038   | -3.98647 |
| 1 | 0 | 5.73928  | 3.71852  | -3.73532 |
| 1 | 0 | 1.54626  | 4.64533  | -4.04294 |
| 6 | 0 | 3.60619  | -3.20981 | -3.84102 |
| 1 | 0 | 1.49577  | -3.63756 | -3.67562 |
| 1 | 0 | 5.65078  | -2.51709 | -3.83459 |
| 6 | 0 | -3.54024 | -1.76766 | -2.63462 |
| 7 | 0 | -4.31804 | -0.12755 | -0.97721 |

|    |   |          |          |          |
|----|---|----------|----------|----------|
| 6  | 0 | -1.42308 | -1.43713 | -3.7476  |
| 1  | 0 | -0.45453 | 0.44622  | -3.34301 |
| 6  | 0 | 1.4457   | 5.34552  | 1.09689  |
| 1  | 0 | 3.91539  | 5.17476  | -4.59097 |
| 1  | 0 | 3.83213  | -4.11688 | -4.39504 |
| 6  | 0 | -2.55742 | -2.22038 | -3.50818 |
| 1  | 0 | -4.40205 | -2.38542 | -2.41571 |
| 6  | 0 | -3.76435 | 0.56642  | 0.20938  |
| 16 | 0 | -5.98412 | -0.06675 | -1.20282 |
| 1  | 0 | -0.63647 | -1.78996 | -4.40901 |
| 1  | 0 | 2.40858  | 5.02145  | 0.69081  |
| 1  | 0 | 1.39816  | 6.43366  | 1.15167  |
| 1  | 0 | 1.31299  | 4.90934  | 2.09217  |
| 1  | 0 | -2.66698 | -3.19071 | -3.98488 |
| 1  | 0 | -4.50321 | 0.46433  | 1.01161  |
| 1  | 0 | -2.88181 | 0.00439  | 0.5201   |
| 6  | 0 | -3.41758 | 2.01122  | -0.03865 |
| 8  | 0 | -6.47321 | 1.21653  | -0.68958 |
| 8  | 0 | -6.26018 | -0.50988 | -2.57034 |
| 6  | 0 | -6.59301 | -1.33241 | -0.0761  |
| 6  | 0 | -2.57663 | 2.71954  | 0.83408  |
| 1  | 0 | -4.2429  | 2.57701  | -0.46812 |
| 6  | 0 | -6.7091  | -2.64892 | -0.52792 |
| 6  | 0 | -6.93356 | -0.98067 | 1.23129  |
| 1  | 0 | -1.91985 | 2.17473  | 1.50922  |
| 6  | 0 | -2.94929 | 4.06061  | 1.33437  |
| 6  | 0 | -7.15477 | -3.63312 | 0.3544   |
| 1  | 0 | -6.48221 | -2.88481 | -1.56219 |
| 6  | 0 | -7.37438 | -1.97432 | 2.1076   |
| 1  | 0 | -6.8749  | 0.0568   | 1.54188  |
| 9  | 0 | -3.92642 | 4.03175  | 2.29147  |
| 9  | 0 | -1.8961  | 4.6977   | 1.91875  |
| 9  | 0 | -3.42042 | 4.87305  | 0.3512   |
| 6  | 0 | -7.48239 | -3.29755 | 1.6724   |
| 1  | 0 | -7.25725 | -4.65869 | 0.01109  |
| 1  | 0 | -7.64341 | -1.7113  | 3.1266   |
| 1  | 0 | -7.83239 | -4.06638 | 2.35575  |

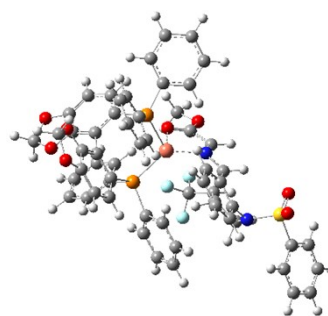

TS-exo ent-7a

E(B3LYPD3/BS1) = -4525.78727356  
 H(correction)= 0.989017  
 G(correction)= 0.815829  
 E(M06/BS2)<sub>CH<sub>2</sub>Cl<sub>2</sub></sub> = -4524.48219957  
 Imaginary frequencies: 1 (-387.5971 cm<sup>-1</sup>)

|   |   |          |          |          |
|---|---|----------|----------|----------|
| 6 | 0 | -4.29392 | -1.68108 | -1.89344 |
|---|---|----------|----------|----------|

|    |   |          |          |          |    |   |          |          |          |
|----|---|----------|----------|----------|----|---|----------|----------|----------|
| 6  | 0 | -3.44673 | -0.69312 | -1.42904 | 1  | 0 | 2.61195  | 2.65039  | -4.21922 |
| 6  | 0 | -3.95756 | -2.55833 | -2.92173 | 6  | 0 | -3.06652 | 4.6765   | -2.06107 |
| 8  | 0 | -5.55301 | -1.97303 | -1.43206 | 1  | 0 | -2.67552 | 5.0126   | 0.03364  |
| 6  | 0 | -2.17976 | -0.59071 | -2.08685 | 1  | 0 | -3.32706 | 4.05294  | -4.11347 |
| 6  | 0 | -3.9433  | 0.2327   | -0.36571 | 6  | 0 | -3.6115  | -1.30687 | 5.51224  |
| 6  | 0 | -2.75051 | -2.46319 | -3.57857 | 1  | 0 | -4.57212 | -1.24232 | 3.59042  |
| 8  | 0 | -4.98621 | -3.43771 | -3.13797 | 6  | 0 | -1.20416 | -1.06464 | 5.50942  |
| 6  | 0 | -5.94959 | -3.17071 | -2.1077  | 1  | 0 | -0.28884 | -0.81486 | 3.56863  |
| 6  | 0 | -1.86824 | -1.45751 | -3.13959 | 6  | 0 | -2.27143 | -4.47314 | -0.53447 |
| 15 | 0 | -0.9473  | 0.60725  | -1.40464 | 1  | 0 | -1.05595 | -2.71411 | -0.29754 |
| 6  | 0 | -3.60261 | 0.1886   | 1.02098  | 6  | 0 | -4.29819 | -4.52848 | 0.78171  |
| 6  | 0 | -4.82597 | 1.22947  | -0.7418  | 1  | 0 | -4.66239 | -2.82955 | 2.04136  |
| 1  | 0 | -2.49208 | -3.13158 | -4.39241 | 6  | 0 | 3.73839  | -1.86696 | -0.24378 |
| 1  | 0 | -5.95501 | -4.00318 | -1.39318 | 6  | 0 | 1.54172  | -2.52224 | 0.51237  |
| 1  | 0 | -6.93421 | -3.02336 | -2.56196 | 8  | 0 | -0.67706 | 1.92704  | 2.18469  |
| 1  | 0 | -0.91496 | -1.361   | -3.64518 | 8  | 0 | 0.65121  | 3.14375  | 3.55453  |
| 29 | 0 | -0.36937 | 0.10126  | 0.79045  | 1  | 0 | 3.91074  | 0.53665  | -4.42646 |
| 6  | 0 | 0.50618  | 0.57224  | -2.52812 | 1  | 0 | -3.56774 | 5.63056  | -2.20353 |
| 6  | 0 | -1.76732 | 2.22467  | -1.69523 | 6  | 0 | -2.40043 | -1.23537 | 6.20784  |
| 6  | 0 | -4.09702 | 1.16481  | 1.89462  | 1  | 0 | -4.54548 | -1.4269  | 6.05495  |
| 15 | 0 | -2.28778 | -0.9702  | 1.58274  | 1  | 0 | -0.26193 | -0.99519 | 6.04608  |
| 6  | 0 | -5.32213 | 2.18554  | 0.1399   | 6  | 0 | -3.44593 | -5.12459 | -0.15322 |
| 8  | 0 | -5.31565 | 1.46386  | -2.0014  | 1  | 0 | -1.61233 | -4.91733 | -1.27509 |
| 7  | 0 | 1.44236  | 0.16521  | 1.78965  | 1  | 0 | -5.21272 | -5.03285 | 1.08372  |
| 6  | 0 | 1.26587  | -0.60944 | -2.61501 | 6  | 0 | 3.79735  | -2.99872 | -1.05911 |
| 6  | 0 | 1.00672  | 1.74365  | -3.11522 | 7  | 0 | 4.84254  | -0.95239 | -0.21304 |
| 6  | 0 | -1.90771 | 3.11302  | -0.62002 | 6  | 0 | 1.59909  | -3.65331 | -0.30251 |
| 6  | 0 | -2.29524 | 2.56314  | -2.95059 | 1  | 0 | 0.68353  | -2.34908 | 1.15341  |
| 6  | 0 | -4.96863 | 2.18436  | 1.4718   | 6  | 0 | -0.37685 | 4.14047  | 3.5921   |
| 1  | 0 | -3.78546 | 1.15531  | 2.93213  | 1  | 0 | -2.39306 | -1.30388 | 7.29245  |
| 6  | 0 | -2.42434 | -1.06065 | 3.40884  | 1  | 0 | -3.69961 | -6.08938 | -0.5841  |
| 6  | 0 | -2.80021 | -2.62687 | 0.95775  | 6  | 0 | 2.72798  | -3.89354 | -1.09293 |
| 8  | 0 | -6.14266 | 3.05555  | -0.52905 | 1  | 0 | 4.6909   | -3.16986 | -1.65011 |
| 6  | 0 | -6.09194 | 2.66377  | -1.90906 | 6  | 0 | 4.59055  | 0.52068  | -0.30663 |
| 6  | 0 | 2.60949  | -0.37621 | 1.35576  | 16 | 0 | 6.11778  | -1.38556 | 0.82897  |
| 6  | 0 | 1.59078  | 1.27512  | 2.52099  | 1  | 0 | 0.77231  | -4.35854 | -0.3002  |
| 6  | 0 | 2.47202  | -0.62576 | -3.31441 | 1  | 0 | -1.33456 | 3.70764  | 3.89505  |
| 1  | 0 | 0.93808  | -1.51329 | -2.11003 | 1  | 0 | -0.04195 | 4.87952  | 4.32114  |
| 6  | 0 | 2.22911  | 1.72902  | -3.78934 | 1  | 0 | -0.48157 | 4.60231  | 2.60527  |
| 1  | 0 | 0.46397  | 2.6767   | -3.01712 | 1  | 0 | 2.78139  | -4.77913 | -1.71982 |
| 6  | 0 | -2.56087 | 4.33236  | -0.80577 | 1  | 0 | 5.33094  | 1.02203  | 0.32053  |
| 1  | 0 | -1.51545 | 2.84408  | 0.35454  | 1  | 0 | 4.78947  | 0.80644  | -1.34571 |
| 6  | 0 | -2.93191 | 3.79041  | -3.13533 | 6  | 0 | 3.20234  | 1.01202  | 0.06908  |
| 1  | 0 | -2.20982 | 1.8653   | -3.77916 | 8  | 0 | 6.01746  | -0.68773 | 2.12256  |
| 1  | 0 | -5.33882 | 2.93757  | 2.15836  | 8  | 0 | 6.21682  | -2.84658 | 0.79022  |
| 6  | 0 | -3.62483 | -1.21936 | 4.12064  | 6  | 0 | 7.50985  | -0.6674  | -0.05075 |
| 6  | 0 | -1.21489 | -0.97169 | 4.11605  | 6  | 0 | 3.07539  | 2.26324  | 0.70022  |
| 6  | 0 | -1.95025 | -3.23599 | 0.02299  | 1  | 0 | 2.45923  | 0.8095   | -0.6969  |
| 6  | 0 | -3.98216 | -3.28403 | 1.32913  | 6  | 0 | 8.3472   | 0.22726  | 0.61435  |
| 1  | 0 | -5.60419 | 3.45367  | -2.49116 | 6  | 0 | 7.7496   | -1.05062 | -1.37263 |
| 1  | 0 | -7.10824 | 2.46731  | -2.26759 | 1  | 0 | 3.9014   | 2.67767  | 1.27187  |
| 6  | 0 | 2.60746  | -1.61321 | 0.55468  | 6  | 0 | 2.13694  | 3.28039  | 0.20293  |
| 1  | 0 | 3.48154  | -0.27321 | 2.00882  | 6  | 0 | 9.4491   | 0.75264  | -0.06459 |
| 6  | 0 | 0.42499  | 2.10785  | 2.72553  | 1  | 0 | 8.12662  | 0.50299  | 1.6399   |
| 1  | 0 | 2.46575  | 1.44964  | 3.14033  | 6  | 0 | 8.85067  | -0.5188  | -2.04047 |
| 6  | 0 | 2.95959  | 0.54492  | -3.90076 | 1  | 0 | 7.0762   | -1.74422 | -1.86535 |
| 1  | 0 | 3.04226  | -1.54758 | -3.36471 | 9  | 0 | 0.94547  | 2.75383  | -0.20978 |

|   |   |          |          |          |
|---|---|----------|----------|----------|
| 9 | 0 | 1.84235  | 4.23709  | 1.12787  |
| 9 | 0 | 2.60045  | 3.97751  | -0.88853 |
| 6 | 0 | 9.69934  | 0.38143  | -1.38695 |
| 1 | 0 | 10.10846 | 1.45286  | 0.44017  |
| 1 | 0 | 9.04769  | -0.80456 | -3.06986 |
| 1 | 0 | 10.55589 | 0.79461  | -1.91248 |

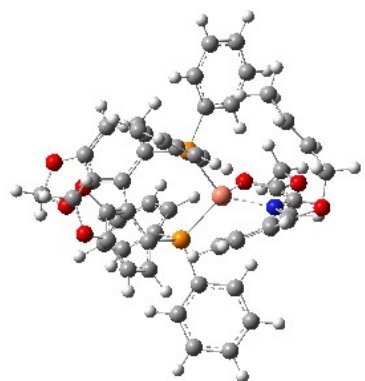

**mod14**

E(B3LYPD3/BS1) = -3468.31785551  
H(correction)= 0.899447  
G(correction)= 0.747147  
E(M06/BS2)<sub>CH2Cl2</sub> = -3467.15195646  
Imaginary frequencies: 0

|    |   |          |          |          |
|----|---|----------|----------|----------|
| 6  | 0 | -1.86175 | -2.23241 | -2.14535 |
| 6  | 0 | -1.88647 | -1.18901 | -1.23816 |
| 6  | 0 | -1.61783 | -2.06088 | -3.50769 |
| 8  | 0 | -2.09626 | -3.56183 | -1.88818 |
| 6  | 0 | -1.66843 | 0.11712  | -1.78212 |
| 6  | 0 | -2.26421 | -1.4813  | 0.17974  |
| 6  | 0 | -1.40931 | -0.81106 | -4.04777 |
| 8  | 0 | -1.67661 | -3.27318 | -4.14621 |
| 6  | 0 | -1.75801 | -4.24855 | -3.09832 |
| 6  | 0 | -1.43189 | 0.27534  | -3.15283 |
| 15 | 0 | -1.44649 | 1.53043  | -0.62285 |
| 6  | 0 | -1.3795  | -1.56949 | 1.29801  |
| 6  | 0 | -3.59987 | -1.72645 | 0.44619  |
| 1  | 0 | -1.23313 | -0.67154 | -5.10867 |
| 1  | 0 | -0.78082 | -4.73485 | -2.97745 |
| 1  | 0 | -2.54278 | -4.97154 | -3.33548 |
| 1  | 0 | -1.24542 | 1.26704  | -3.54873 |
| 29 | 0 | 0.50051  | 1.12781  | 0.59256  |
| 6  | 0 | -1.44088 | 3.04137  | -1.66818 |
| 6  | 0 | -3.01614 | 1.61852  | 0.32566  |
| 6  | 0 | -1.88744 | -1.85177 | 2.57232  |
| 15 | 0 | 0.39962  | -1.12665 | 1.09487  |
| 6  | 0 | -4.09298 | -1.99159 | 1.72054  |
| 8  | 0 | -4.63528 | -1.716   | -0.45562 |
| 6  | 0 | -0.31249 | 3.86988  | -1.57108 |
| 6  | 0 | -2.49592 | 3.41426  | -2.51753 |
| 6  | 0 | -2.91843 | 1.90856  | 1.69527  |
| 6  | 0 | -4.27649 | 1.40383  | -0.25173 |
| 6  | 0 | -3.25668 | -2.06204 | 2.81279  |
| 1  | 0 | -1.20636 | -1.90673 | 3.41339  |

|   |   |          |          |          |
|---|---|----------|----------|----------|
| 6 | 0 | 1.15243  | -1.54036 | 2.72327  |
| 6 | 0 | 1.08363  | -2.4134  | -0.02164 |
| 8 | 0 | -5.45217 | -2.15748 | 1.67104  |
| 6 | 0 | -5.82392 | -1.97745 | 0.29821  |
| 6 | 0 | -0.23626 | 5.04705  | -2.31968 |
| 1 | 0 | 0.49896  | 3.59135  | -0.90473 |
| 6 | 0 | -2.4159  | 4.58824  | -3.26438 |
| 1 | 0 | -3.37835 | 2.78698  | -2.59746 |
| 6 | 0 | -4.07525 | 1.9828   | 2.47457  |
| 1 | 0 | -1.93841 | 2.06686  | 2.13911  |
| 6 | 0 | -5.42827 | 1.49543  | 0.52946  |
| 1 | 0 | -4.35573 | 1.1253   | -1.2982  |
| 1 | 0 | -3.63601 | -2.26996 | 3.80697  |
| 6 | 0 | 1.49958  | -2.84775 | 3.09609  |
| 6 | 0 | 1.40402  | -0.48024 | 3.6085   |
| 6 | 0 | 2.26227  | -2.10433 | -0.71606 |
| 6 | 0 | 0.51371  | -3.6878  | -0.16485 |
| 1 | 0 | -6.49994 | -1.11953 | 0.21757  |
| 1 | 0 | -6.29716 | -2.89362 | -0.07488 |
| 6 | 0 | -1.28449 | 5.40553  | -3.16745 |
| 1 | 0 | 0.64313  | 5.67972  | -2.23687 |
| 1 | 0 | -3.23574 | 4.86838  | -3.9207  |
| 6 | 0 | -5.32908 | 1.77951  | 1.89511  |
| 1 | 0 | -3.99443 | 2.19605  | 3.53716  |
| 1 | 0 | -6.40383 | 1.34297  | 0.07397  |
| 6 | 0 | 2.09951  | -3.09041 | 4.33177  |
| 1 | 0 | 1.31825  | -3.67339 | 2.4145   |
| 6 | 0 | 2.00071  | -0.7295  | 4.84679  |
| 1 | 0 | 1.12278  | 0.53132  | 3.32675  |
| 6 | 0 | 2.86639  | -3.05624 | -1.53877 |
| 1 | 0 | 2.70964  | -1.12129 | -0.6176  |
| 6 | 0 | 1.12326  | -4.63895 | -0.9852  |
| 1 | 0 | -0.41057 | -3.93076 | 0.34968  |
| 1 | 0 | -1.2252  | 6.32064  | -3.75082 |
| 1 | 0 | -6.22754 | 1.83781  | 2.50388  |
| 6 | 0 | 2.35462  | -2.03118 | 5.20763  |
| 1 | 0 | 2.37398  | -4.10503 | 4.60853  |
| 1 | 0 | 2.19631  | 0.09774  | 5.524    |
| 6 | 0 | 2.29905  | -4.32486 | -1.67428 |
| 1 | 0 | 3.76901  | -2.79016 | -2.07998 |
| 1 | 0 | 0.68189  | -5.62814 | -1.08129 |
| 1 | 0 | 2.82922  | -2.2216  | 6.16674  |
| 1 | 0 | 2.76784  | -5.06658 | -2.31588 |
| 7 | 0 | 2.2316   | 2.31978  | 0.4003   |
| 6 | 0 | 3.22778  | 2.24936  | -0.44618 |
| 6 | 0 | 2.2514   | 3.20225  | 1.44503  |
| 6 | 0 | 3.25913  | 1.38275  | -1.61387 |
| 1 | 0 | 4.12027  | 2.85058  | -0.26553 |
| 6 | 0 | 1.21527  | 3.15676  | 2.38366  |
| 1 | 0 | 3.06104  | 3.92005  | 1.55316  |
| 6 | 0 | 4.51045  | 0.96434  | -2.12689 |
| 6 | 0 | 2.10604  | 0.93632  | -2.29203 |
| 8 | 0 | 0.25178  | 2.33071  | 2.38953  |
| 8 | 0 | 1.30155  | 4.09673  | 3.37253  |
| 6 | 0 | 4.59521  | 0.11712  | -3.23091 |
| 8 | 0 | 5.66531  | 1.43106  | -1.52864 |
| 6 | 0 | 2.1874   | 0.08014  | -3.38585 |

|   |   |          |          |          |
|---|---|----------|----------|----------|
| 1 | 0 | 1.13575  | 1.27489  | -1.94891 |
| 6 | 0 | 0.25697  | 4.06931  | 4.34138  |
| 6 | 0 | 3.43404  | -0.33539 | -3.86182 |
| 1 | 0 | 5.57915  | -0.17283 | -3.58933 |
| 6 | 0 | 6.3833   | 0.46894  | -0.73076 |
| 1 | 0 | 1.27533  | -0.25965 | -3.86526 |
| 1 | 0 | 0.21991  | 3.1067   | 4.8642   |
| 1 | 0 | 0.4895   | 4.86935  | 5.04766  |
| 1 | 0 | -0.72068 | 4.24995  | 3.88031  |
| 1 | 0 | 3.5034   | -0.99644 | -4.72149 |
| 1 | 0 | 6.71235  | -0.37295 | -1.3583  |
| 1 | 0 | 7.27529  | 1.01685  | -0.40596 |
| 6 | 0 | 5.59797  | -0.03161 | 0.44687  |
| 6 | 0 | 5.39438  | -1.32686 | 0.70397  |
| 1 | 0 | 5.1899   | 0.72973  | 1.11095  |
| 1 | 0 | 5.80076  | -2.06602 | 0.00965  |
| 6 | 0 | 4.65374  | -1.87673 | 1.88626  |
| 1 | 0 | 5.31964  | -2.46724 | 2.53087  |
| 1 | 0 | 3.85134  | -2.54821 | 1.5617   |
| 1 | 0 | 4.20175  | -1.08655 | 2.49406  |

-----

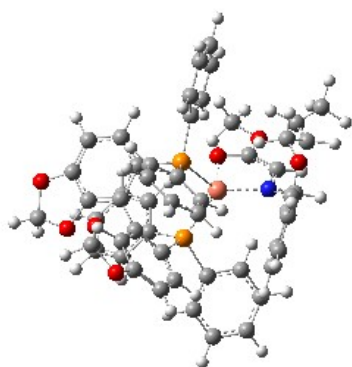

TS-endo 14

E(B3LYPD3/BS1) = -3468.28642713  
H(correction)= 0.898178  
G(correction)= 0.749660  
E(M06/BS2)<sub>CH<sub>2</sub>Cl<sub>2</sub></sub> = -3467.11589772  
Imaginary frequencies: 1 (-423.7807 cm<sup>-1</sup>)

|    |   |          |          |          |
|----|---|----------|----------|----------|
| 6  | 0 | -3.19024 | 1.94447  | 0.57088  |
| 6  | 0 | -2.51435 | 0.76372  | 0.31952  |
| 6  | 0 | -3.23427 | 2.55041  | 1.8237   |
| 8  | 0 | -3.86999 | 2.71488  | -0.33852 |
| 6  | 0 | -1.91122 | 0.13653  | 1.4544   |
| 6  | 0 | -2.47564 | 0.25007  | -1.0841  |
| 6  | 0 | -2.61135 | 1.98788  | 2.91629  |
| 8  | 0 | -3.94159 | 3.7221   | 1.75109  |
| 6  | 0 | -4.32891 | 3.86629  | 0.37756  |
| 6  | 0 | -1.95236 | 0.76339  | 2.70588  |
| 15 | 0 | -0.88137 | -1.3655  | 1.19572  |
| 6  | 0 | -1.35152 | 0.34151  | -1.96601 |
| 6  | 0 | -3.62047 | -0.30692 | -1.623   |
| 1  | 0 | -2.62655 | 2.46731  | 3.8886   |
| 1  | 0 | -3.85447 | 4.76189  | -0.0379  |
| 1  | 0 | -5.42159 | 3.92393  | 0.31125  |
| 1  | 0 | -1.45304 | 0.30013  | 3.54886  |

|    |   |          |          |          |
|----|---|----------|----------|----------|
| 29 | 0 | 1.07617  | -0.65103 | 0.14306  |
| 6  | 0 | -0.6718  | -2.14455 | 2.84728  |
| 6  | 0 | -1.98842 | -2.52558 | 0.28984  |
| 6  | 0 | -1.44017 | -0.15314 | -3.27108 |
| 15 | 0 | 0.25283  | 0.96876  | -1.29703 |
| 6  | 0 | -3.69056 | -0.8098  | -2.91977 |
| 8  | 0 | -4.82992 | -0.4756  | -0.99688 |
| 7  | 0 | 2.89654  | -1.10413 | 0.90752  |
| 6  | 0 | 0.61879  | -2.60797 | 3.14897  |
| 6  | 0 | -1.70605 | -2.34384 | 3.77648  |
| 6  | 0 | -1.46712 | -3.16775 | -0.84326 |
| 6  | 0 | -3.31265 | -2.77572 | 0.67857  |
| 6  | 0 | -2.61217 | -0.74708 | -3.77462 |
| 1  | 0 | -0.5792  | -0.08192 | -3.92599 |
| 6  | 0 | 1.34076  | 1.21663  | -2.75961 |
| 6  | 0 | -0.18052 | 2.64668  | -0.70304 |
| 8  | 0 | -4.9413  | -1.31878 | -3.15557 |
| 6  | 0 | -5.65851 | -1.18974 | -1.92024 |
| 6  | 0 | 3.72067  | -0.26272 | 1.56027  |
| 6  | 0 | 3.52995  | -2.11818 | 0.25983  |
| 6  | 0 | 0.86847  | -3.26123 | 4.35874  |
| 1  | 0 | 1.42367  | -2.43914 | 2.43712  |
| 6  | 0 | -1.452   | -2.99132 | 4.9849   |
| 1  | 0 | -2.70609 | -1.97753 | 3.5656   |
| 6  | 0 | -2.26695 | -4.04526 | -1.57855 |
| 1  | 0 | -0.44429 | -2.96735 | -1.14782 |
| 6  | 0 | -4.1011  | -3.66723 | -0.048   |
| 1  | 0 | -3.73788 | -2.25662 | 1.53175  |
| 1  | 0 | -2.66698 | -1.13149 | -4.78702 |
| 6  | 0 | 1.61684  | 2.46369  | -3.33739 |
| 6  | 0 | 2.00459  | 0.07488  | -3.24487 |
| 6  | 0 | 0.24483  | 3.03001  | 0.57531  |
| 6  | 0 | -0.96084 | 3.52932  | -1.4679  |
| 1  | 0 | -5.86864 | -2.18813 | -1.51972 |
| 1  | 0 | -6.58089 | -0.62444 | -2.0924  |
| 6  | 0 | 3.12368  | 0.93673  | 2.21792  |
| 1  | 0 | 4.56829  | -0.69793 | 2.10259  |
| 6  | 0 | 2.79479  | -2.80855 | -0.75756 |
| 1  | 0 | 4.38628  | -2.62763 | 0.69984  |
| 6  | 0 | -0.16448 | -3.45293 | 5.27711  |
| 1  | 0 | 1.87197  | -3.6132  | 4.58248  |
| 1  | 0 | -2.25803 | -3.13661 | 5.69948  |
| 6  | 0 | -3.58166 | -4.29848 | -1.18291 |
| 1  | 0 | -1.86233 | -4.52728 | -2.46456 |
| 1  | 0 | -5.12301 | -3.86458 | 0.26688  |
| 6  | 0 | 2.52974  | 2.56465  | -4.39016 |
| 1  | 0 | 1.13795  | 3.36047  | -2.95945 |
| 6  | 0 | 2.90207  | 0.17963  | -4.30694 |
| 1  | 0 | 1.83411  | -0.8866  | -2.76776 |
| 6  | 0 | -0.0977  | 4.28595  | 1.07916  |
| 1  | 0 | 0.82315  | 2.34133  | 1.18177  |
| 6  | 0 | -1.28352 | 4.79063  | -0.96953 |
| 1  | 0 | -1.32755 | 3.22051  | -2.44273 |
| 6  | 0 | 3.50216  | 2.2432   | 1.85008  |
| 6  | 0 | 2.18421  | 0.78705  | 3.25264  |
| 8  | 0 | 1.69127  | -2.45081 | -1.21927 |
| 8  | 0 | 3.44273  | -3.88845 | -1.26489 |

|   |   |          |          |          |   |   |         |          |          |
|---|---|----------|----------|----------|---|---|---------|----------|----------|
| 1 | 0 | 0.03026  | -3.95732 | 6.21992  | 6 | 0 | 4.31288 | 1.61204  | -0.31783 |
| 1 | 0 | -4.20169 | -4.98325 | -1.75569 | 1 | 0 | 0.95725 | 1.73609  | 4.74892  |
| 6 | 0 | 3.16875  | 1.42521  | -4.88173 | 1 | 0 | 2.67389 | -3.85678 | -3.20893 |
| 1 | 0 | 2.74236  | 3.5385   | -4.82338 | 1 | 0 | 3.45104 | -5.36853 | -2.63776 |
| 1 | 0 | 3.40955  | -0.71015 | -4.67051 | 1 | 0 | 1.81089 | -4.91557 | -2.06919 |
| 6 | 0 | -0.85672 | 5.16782  | 0.30848  | 1 | 0 | 1.76962 | 4.03148  | 4.17825  |
| 1 | 0 | 0.23083  | 4.56337  | 2.07508  | 1 | 0 | 3.27849 | 1.42779  | -0.64049 |
| 1 | 0 | -1.87602 | 5.47443  | -1.57242 | 1 | 0 | 4.8189  | 2.17907  | -1.10797 |
| 6 | 0 | 3.02836  | 3.34611  | 2.5778   | 6 | 0 | 4.99868 | 0.30918  | -0.00923 |
| 8 | 0 | 4.31825  | 2.52984  | 0.79799  | 6 | 0 | 4.94798 | -0.75943 | -0.9206  |
| 6 | 0 | 1.67889  | 1.88311  | 3.95011  | 1 | 0 | 5.92951 | 0.43525  | 0.54781  |
| 1 | 0 | 1.86501  | -0.21708 | 3.51478  | 1 | 0 | 4.25632 | -0.66911 | -1.7566  |
| 6 | 0 | 2.79657  | -4.54008 | -2.36191 | 6 | 0 | 6.11918 | -1.68267 | -1.14291 |
| 1 | 0 | 3.87993  | 1.5086   | -5.69921 | 1 | 0 | 6.81218 | -1.29245 | -1.90476 |
| 1 | 0 | -1.12079 | 6.14575  | 0.70261  | 1 | 0 | 6.69844 | -1.81163 | -0.21941 |
| 6 | 0 | 2.132    | 3.167    | 3.62701  | 1 | 0 | 5.79154 | -2.67585 | -1.47406 |
| 1 | 0 | 3.35593  | 4.33518  | 2.273    |   |   |         |          |          |

---

## 8. HPLC chart

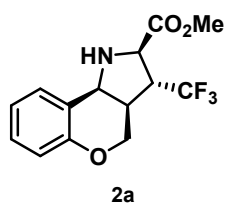

(±)-2a

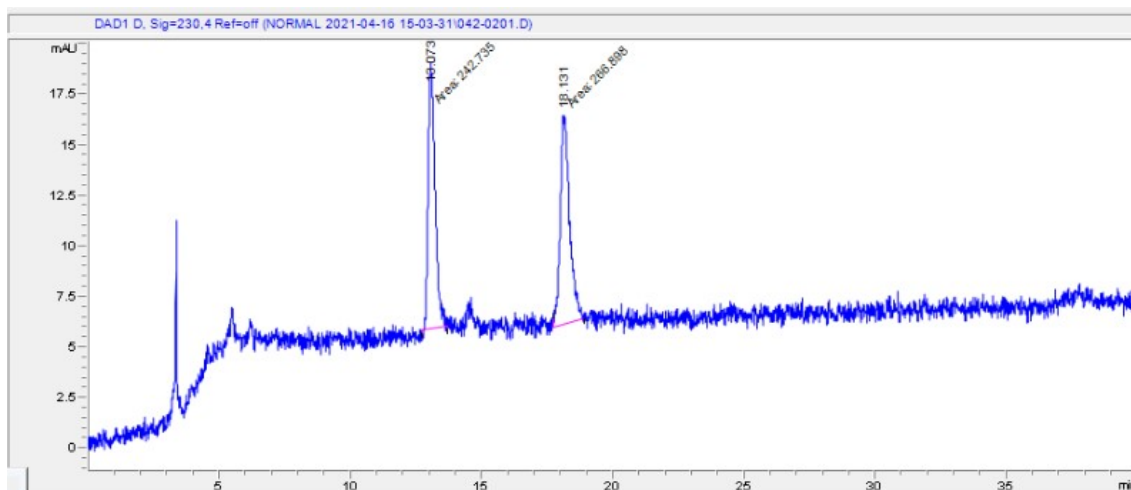

| # | Time   | Area  | Height | Width  | Area%  | Symmetry |
|---|--------|-------|--------|--------|--------|----------|
| 1 | 13.073 | 242.7 | 13.3   | 0.3053 | 47.629 | 0.634    |
| 2 | 18.131 | 266.9 | 10.4   | 0.4259 | 52.371 | 0.519    |

(+)-2a; 93% ee

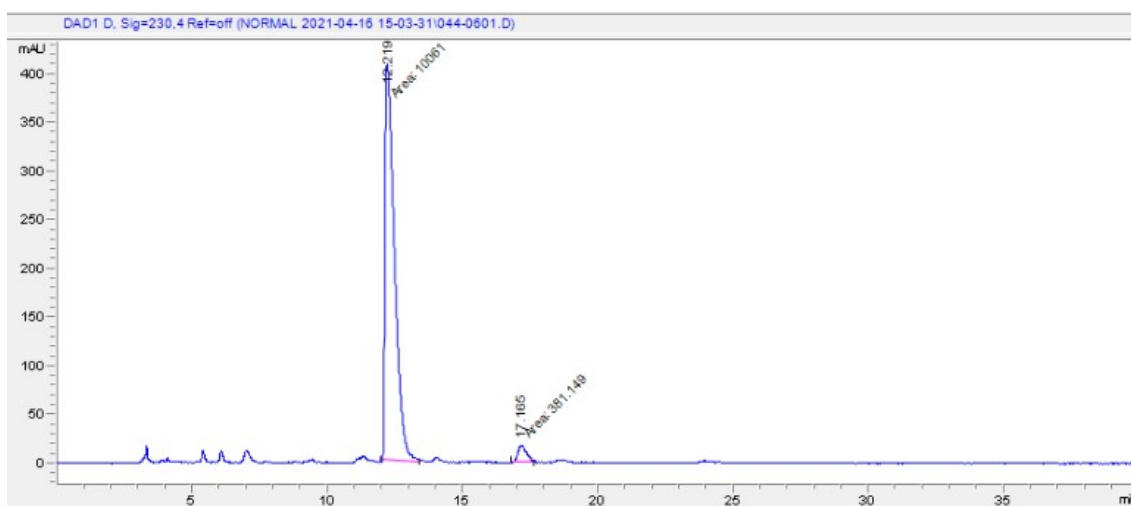

| # | Time   | Area  | Height | Width  | Area%  | Symmetry |
|---|--------|-------|--------|--------|--------|----------|
| 1 | 12.219 | 10061 | 409.5  | 0.4095 | 96.350 | 0.288    |
| 2 | 17.165 | 381.1 | 17.1   | 0.3707 | 3.650  | 0.572    |



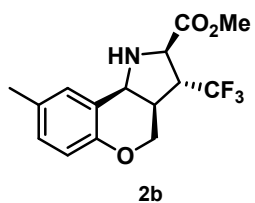

(±)-2b

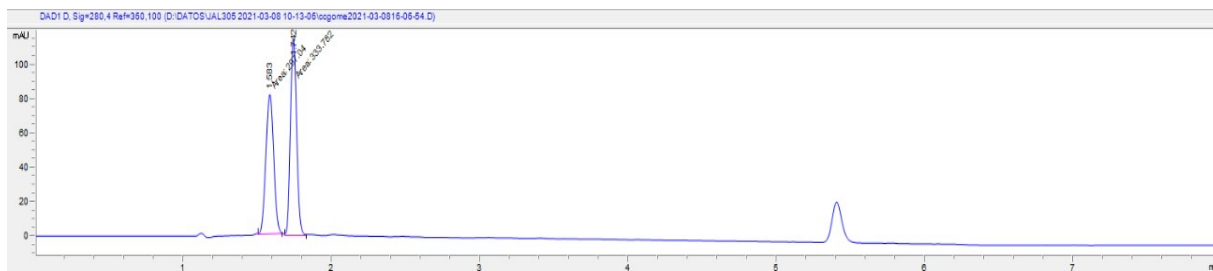

| # | Time  | Type | Area  | Height | Width  | Area%  | Symmetry |
|---|-------|------|-------|--------|--------|--------|----------|
| 1 | 1.583 | MM   | 297   | 81.6   | 0.0607 | 47.088 | 0.988    |
| 2 | 1.742 | MM   | 333.8 | 115.1  | 0.0483 | 52.912 | 0.933    |

(+)-2b; 99% ee

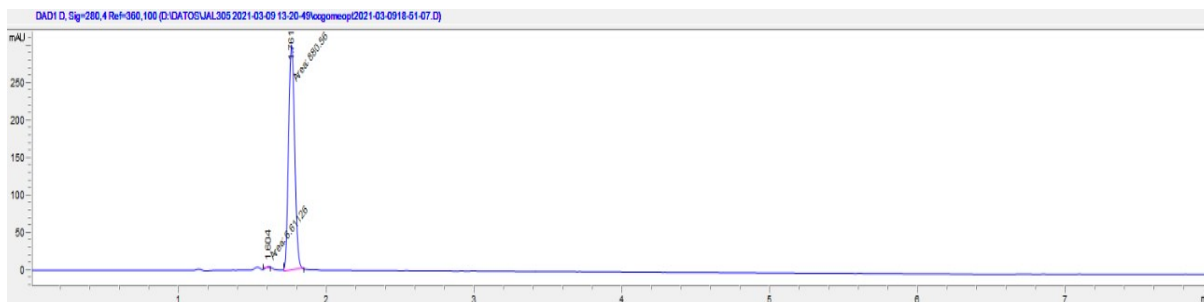

| # | Time  | Type | Area  | Height | Width  | Area%  | Symmetry |
|---|-------|------|-------|--------|--------|--------|----------|
| 1 | 1.604 | MM   | 6.6   | 3.2    | 0.0344 | 0.745  | 1.053    |
| 2 | 1.761 | MM   | 880.6 | 306.4  | 0.0479 | 99.255 | 0.938    |

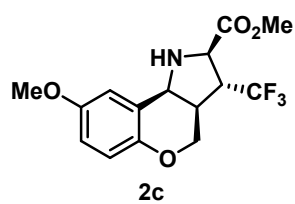

(±)-2c

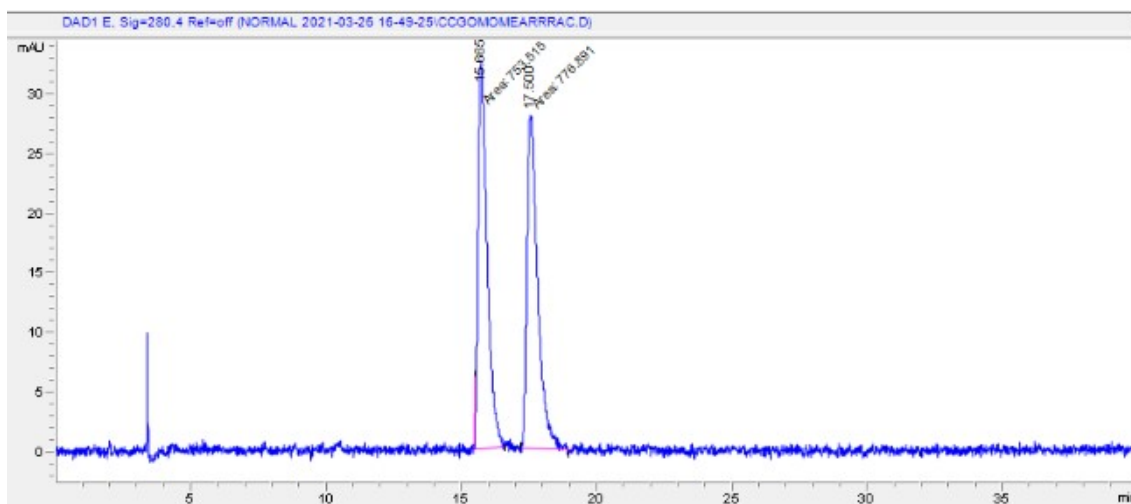

| # | Time   | Area  | Height | Width  | Area%  | Symmetry |
|---|--------|-------|--------|--------|--------|----------|
| 1 | 15.665 | 753.5 | 32.7   | 0.3844 | 49.236 | 0.392    |
| 2 | 17.5   | 776.9 | 28     | 0.462  | 50.764 | 0.462    |

(-)-2c; 98% ee

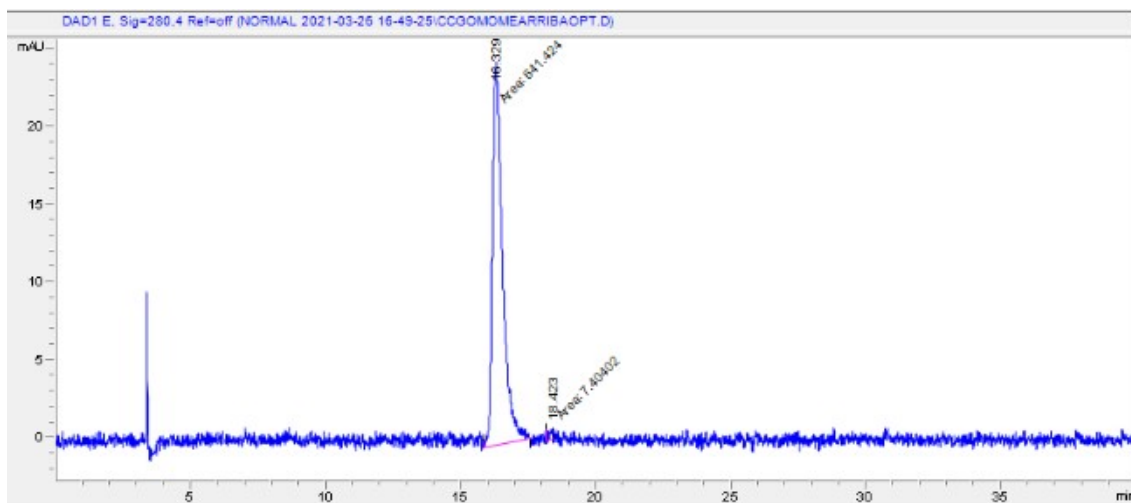

| # | Time   | Area  | Height | Width  | Area%  | Symmetry |
|---|--------|-------|--------|--------|--------|----------|
| 1 | 16.329 | 641.4 | 24.8   | 0.4313 | 98.859 | 0.597    |
| 2 | 18.423 | 7.4   | 8E-1   | 0.1536 | 1.141  | 5.093    |

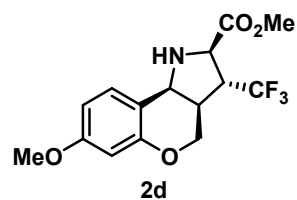

(±)-2d

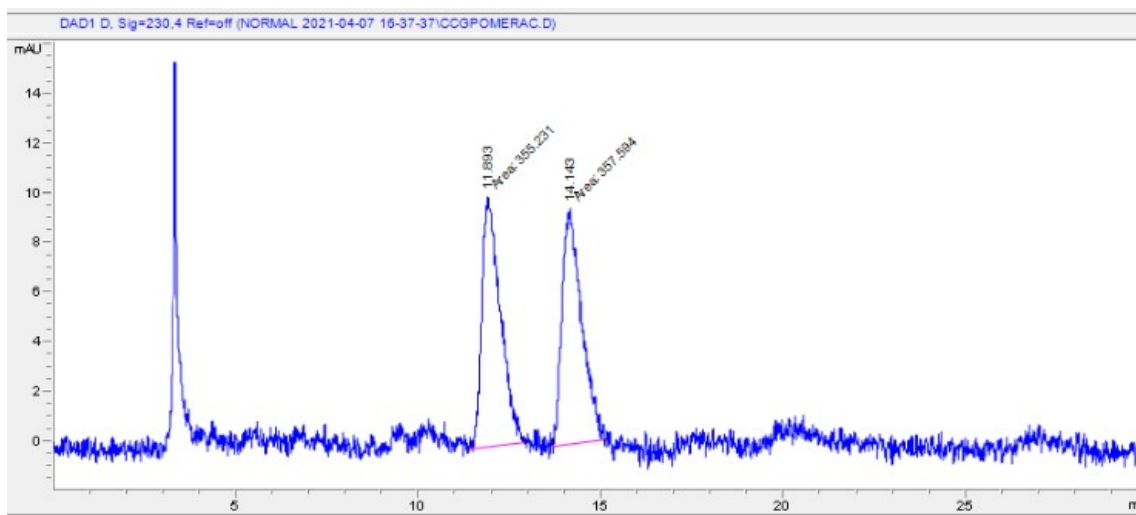

| # | Time   | Area  | Height | Width  | Area%  | Symmetry |
|---|--------|-------|--------|--------|--------|----------|
| 1 | 11.893 | 355.2 | 10.1   | 0.5863 | 49.834 | 0.472    |
| 2 | 14.143 | 357.6 | 9.6    | 0.6231 | 50.166 | 0.647    |

(+)-2d; 98% ee

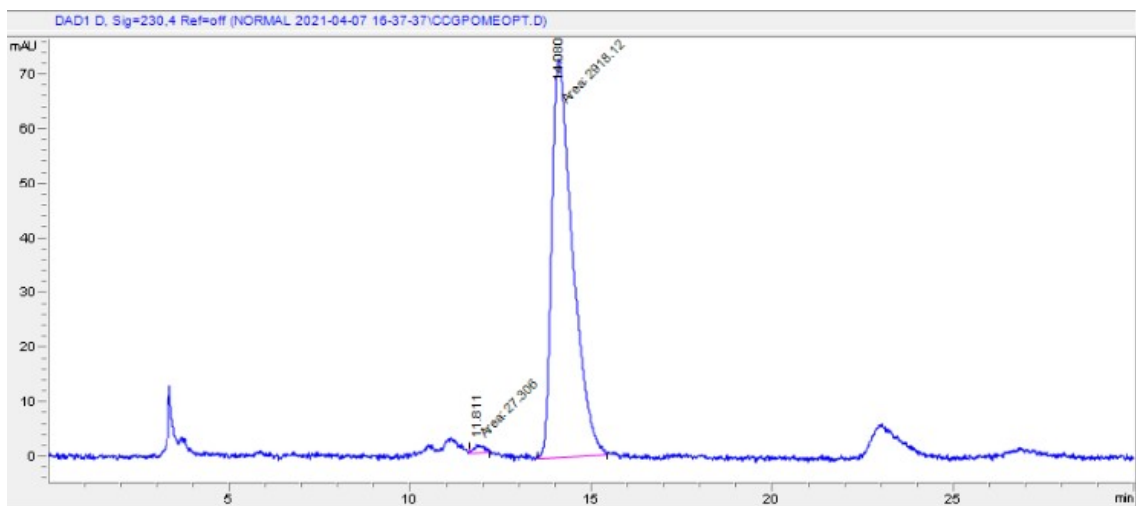

| # | Time   | Area   | Height | Width  | Area%  | Symmetry |
|---|--------|--------|--------|--------|--------|----------|
| 1 | 11.811 | 27.3   | 1.6    | 0.2881 | 0.927  | 0.416    |
| 2 | 14.08  | 2918.1 | 73.1   | 0.6651 | 99.073 | 0.476    |

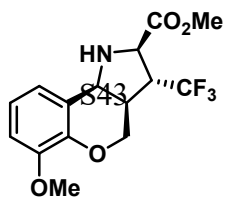

(±)-2e

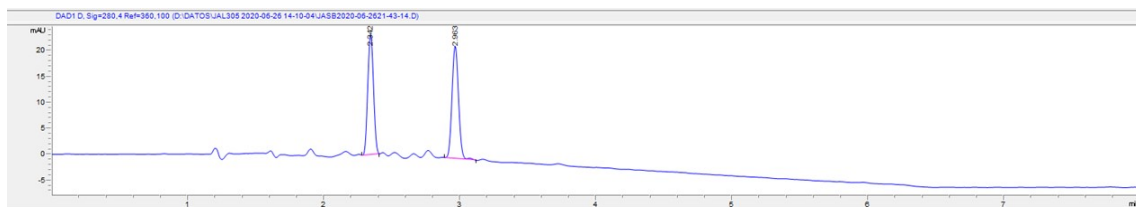

| # | Time  | Type | Area | Height | Width  | Area%  | Symmetry |
|---|-------|------|------|--------|--------|--------|----------|
| 1 | 2.342 | BB   | 67.7 | 23.2   | 0.048  | 48.436 | 0.946    |
| 2 | 2.963 | BB   | 72.1 | 21.8   | 0.0526 | 51.564 | 0.894    |

(+)-2e; 86% ee

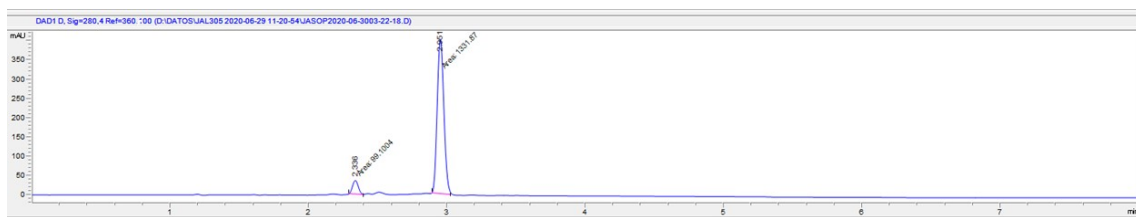

| # | Time  | Type | Area   | Height | Width  | Area%  | Symmetry |
|---|-------|------|--------|--------|--------|--------|----------|
| 1 | 2.336 | MM   | 99.1   | 35.3   | 0.0468 | 6.925  | 0.918    |
| 2 | 2.951 | MM   | 1331.9 | 402.1  | 0.0552 | 93.075 | 0.885    |

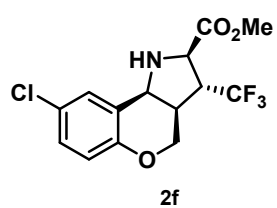

(±)-2f

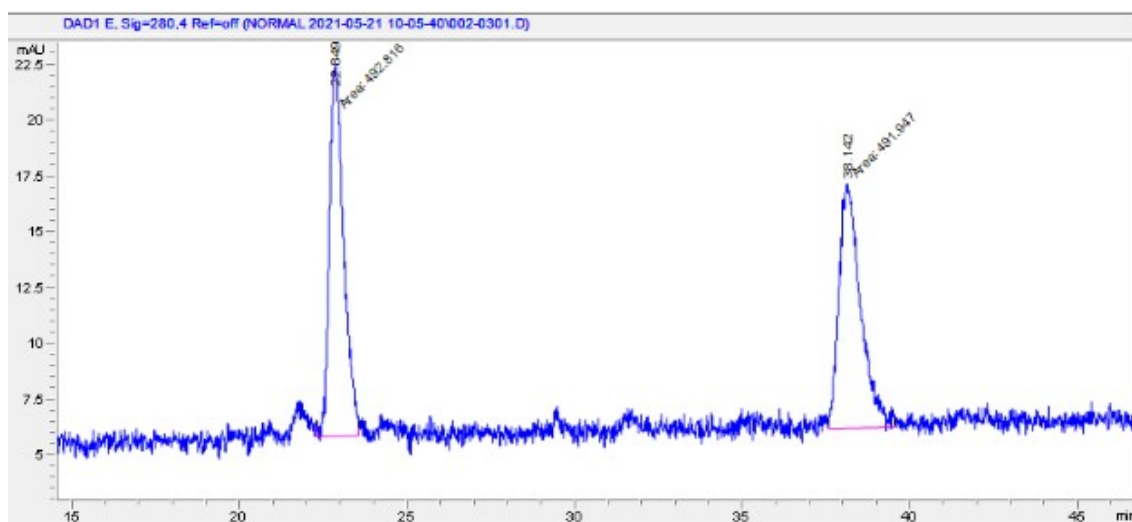

| # | Time   | Area  | Height | Width  | Area%  | Symmetry |
|---|--------|-------|--------|--------|--------|----------|
| 1 | 22.849 | 492.8 | 16.7   | 0.4929 | 50.044 | 0.698    |
| 2 | 38.142 | 491.9 | 10.9   | 0.7525 | 49.956 | 0.627    |

(+)-2f; 97% ee

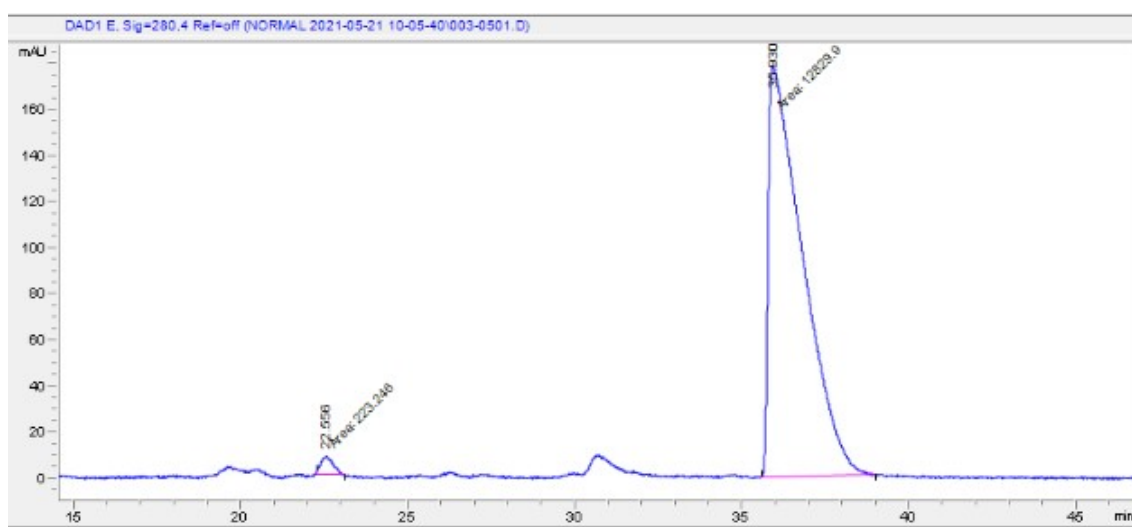

| # | Time   | Area    | Height | Width  | Area%  | Symmetry |
|---|--------|---------|--------|--------|--------|----------|
| 1 | 22.556 | 223.2   | 8.5    | 0.4391 | 1.710  | 0.793    |
| 2 | 35.93  | 12829.9 | 178.9  | 1.1952 | 98.290 | 0.153    |

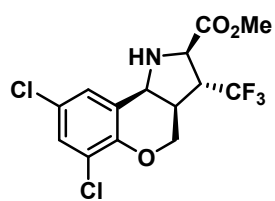

2g

S45

(±)-2g

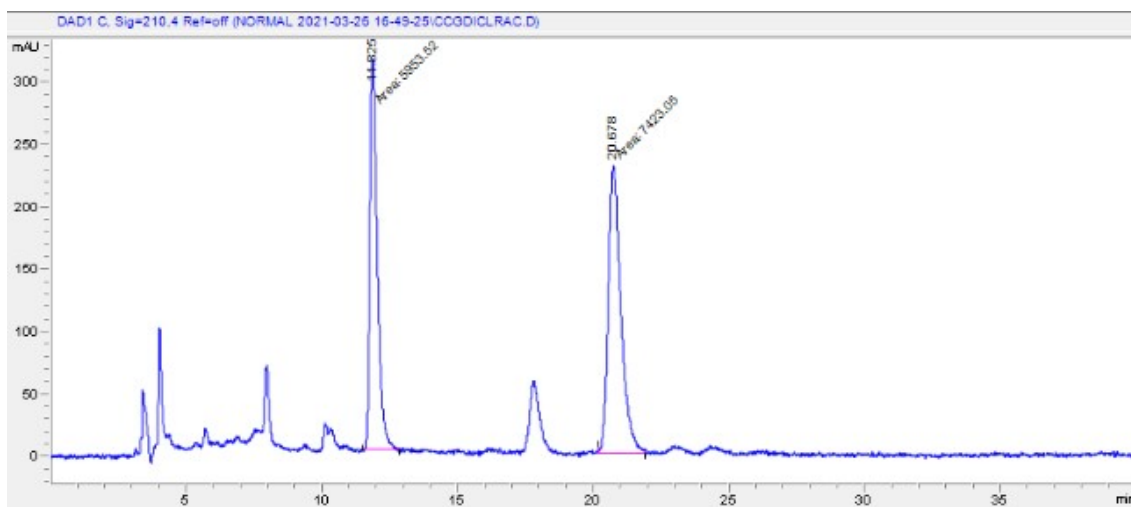

| # | Time   | Area   | Height | Width  | Area%  | Symmetry |
|---|--------|--------|--------|--------|--------|----------|
| 1 | 11.825 | 5953.5 | 313.1  | 0.3169 | 44.507 | 0.543    |
| 2 | 20.678 | 7423   | 230    | 0.5379 | 55.493 | 0.61     |

(+)-2g; 99% ee

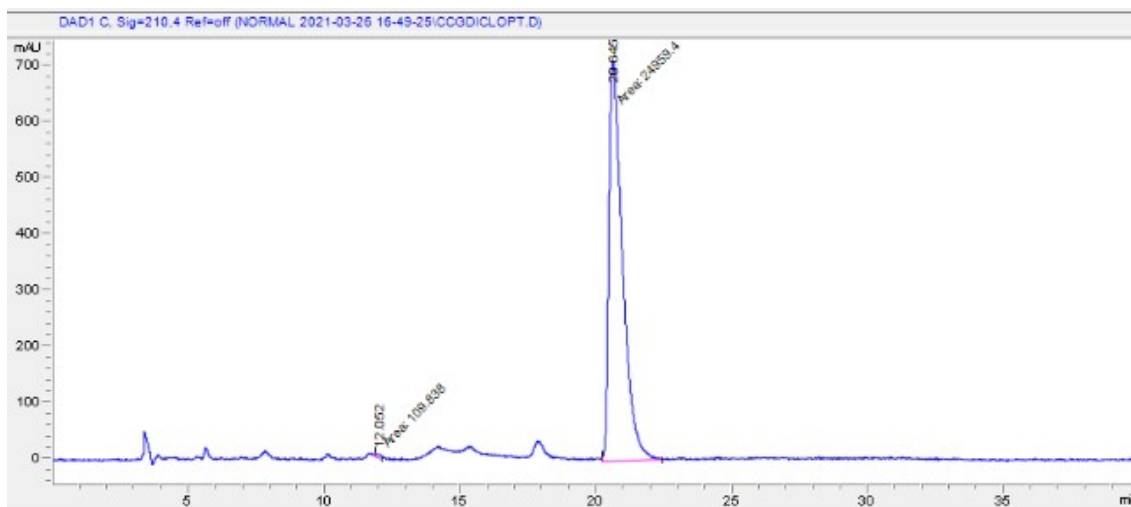

| # | Time   | Area    | Height | Width  | Area%  | Symmetry |
|---|--------|---------|--------|--------|--------|----------|
| 1 | 12.052 | 109.8   | 8.8    | 0.2073 | 0.438  | 1.35     |
| 2 | 20.645 | 24959.4 | 713.6  | 0.5829 | 99.562 | 0.403    |

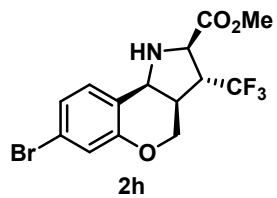

(±)-2h

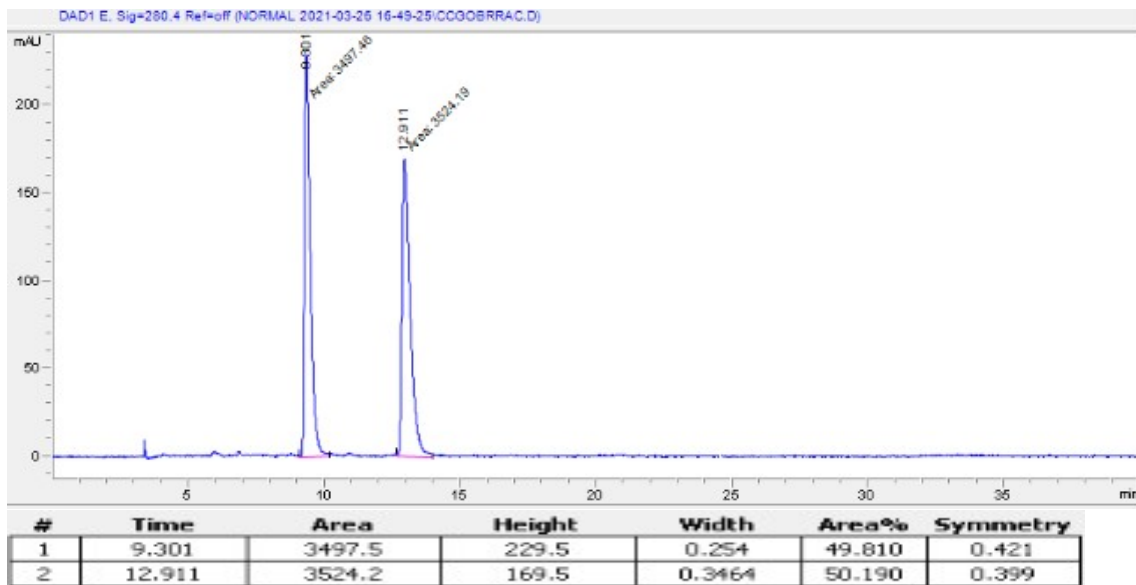

(+)-2h; 82% ee

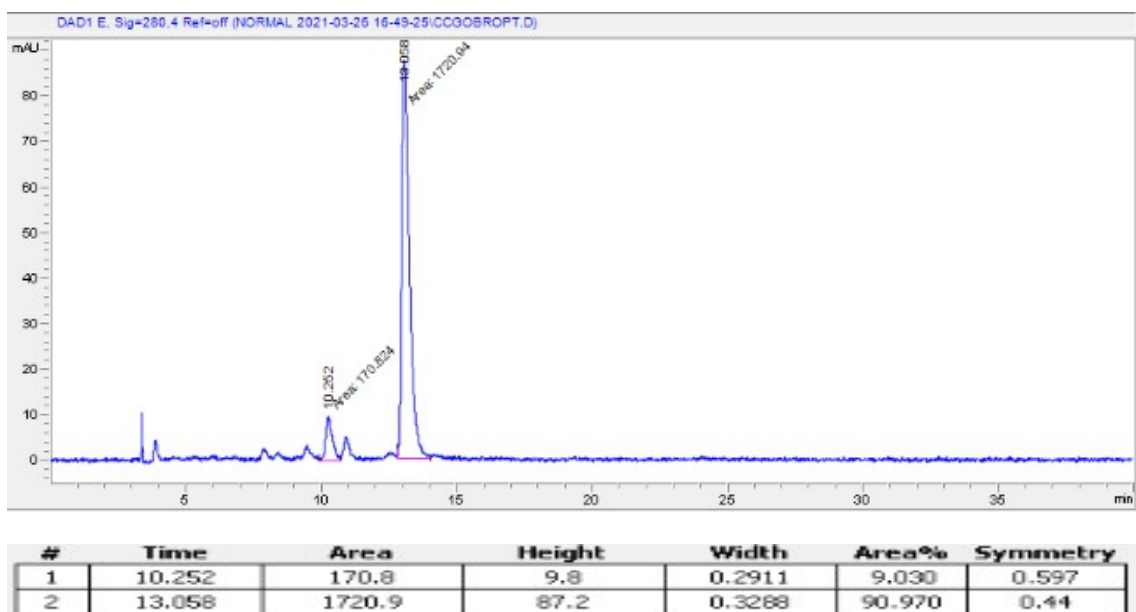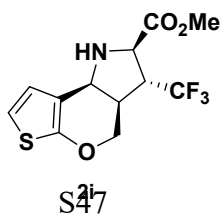

(±)-2i

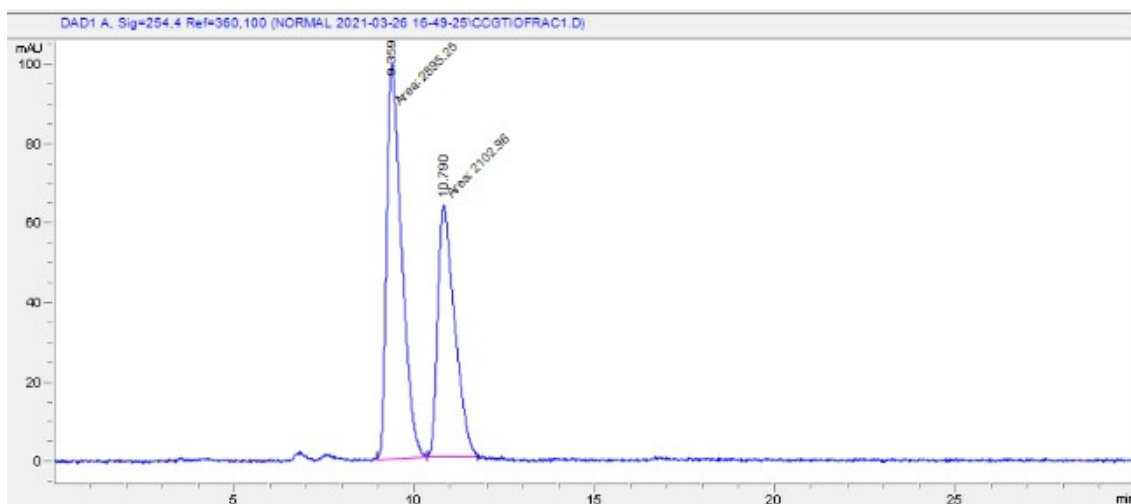

| # | Time  | Area   | Height | Width  | Area%  | Symmetry |
|---|-------|--------|--------|--------|--------|----------|
| 1 | 9.359 | 2895.2 | 100.3  | 0.4812 | 57.926 | 0.544    |
| 2 | 10.79 | 2103   | 63.9   | 0.5469 | 42.074 | 0.524    |

(+)-2i; 99% ee

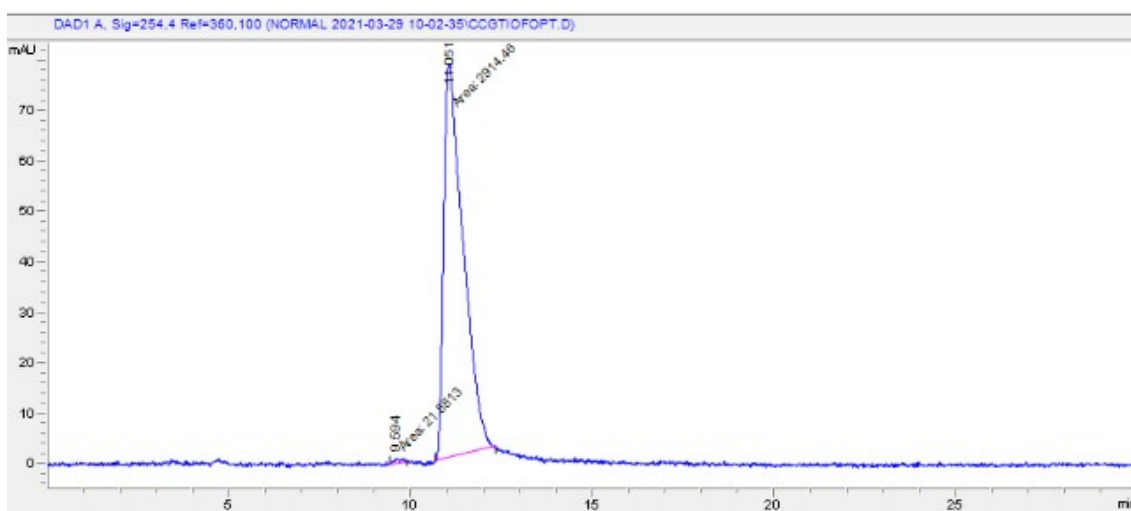

| # | Time   | Area   | Height | Width  | Area%  | Symmetry |
|---|--------|--------|--------|--------|--------|----------|
| 1 | 9.594  | 21.9   | 1.3    | 0.2851 | 0.745  | 0.639    |
| 2 | 11.051 | 2914.5 | 78.4   | 0.6195 | 99.255 | 0.407    |

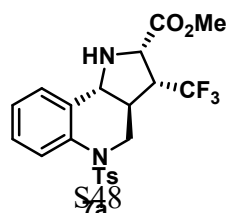



(±)-7a

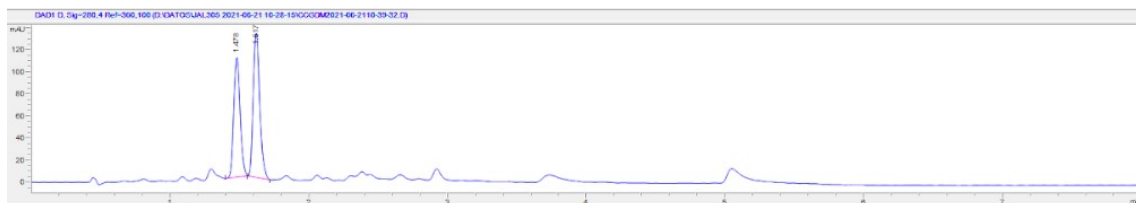

| # | Time  | Type | Area  | Height | Width  | Area%  | Symmetry |
|---|-------|------|-------|--------|--------|--------|----------|
| 1 | 1.478 | BB   | 349.1 | 109.5  | 0.0492 | 44.819 | 0.878    |
| 2 | 1.617 | BB   | 429.9 | 132.2  | 0.0499 | 55.181 | 0.791    |

(+)-7a; 85% ee

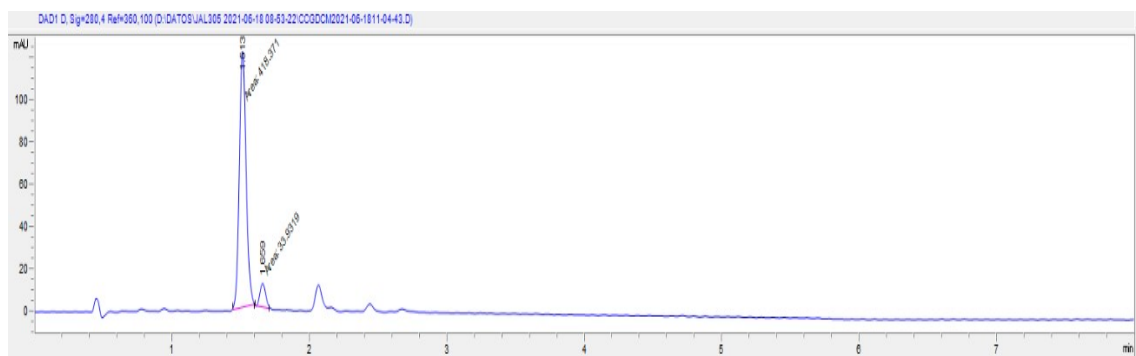

| # | Time  | Type | Area  | Height | Width  | Area%  | Symmetry |
|---|-------|------|-------|--------|--------|--------|----------|
| 1 | 1.513 | MM   | 418.4 | 122.8  | 0.0568 | 92.498 | 0.901    |
| 2 | 1.659 | MM   | 33.9  | 11.6   | 0.0489 | 7.502  | 0.911    |

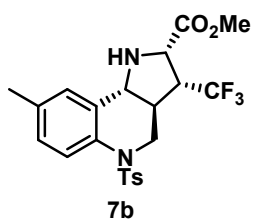

(±)-7b

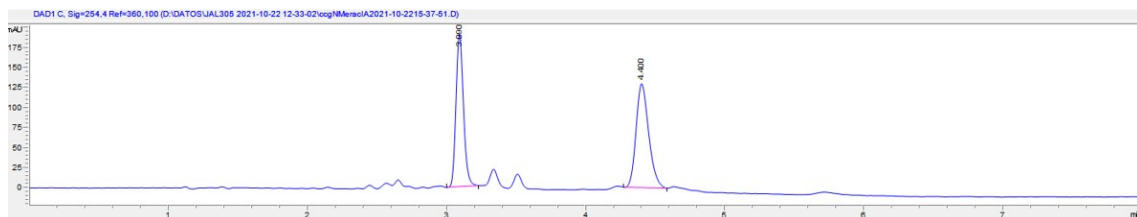

| # | Time | Type | Area  | Height | Width  | Area%  | Symmetry |
|---|------|------|-------|--------|--------|--------|----------|
| 1 | 3.09 | BB   | 713.8 | 191.5  | 0.0575 | 46.631 | 0.823    |
| 2 | 4.4  | BB   | 817   | 129.8  | 0.0974 | 53.369 | 0.756    |

(-)-7b; 94% ee

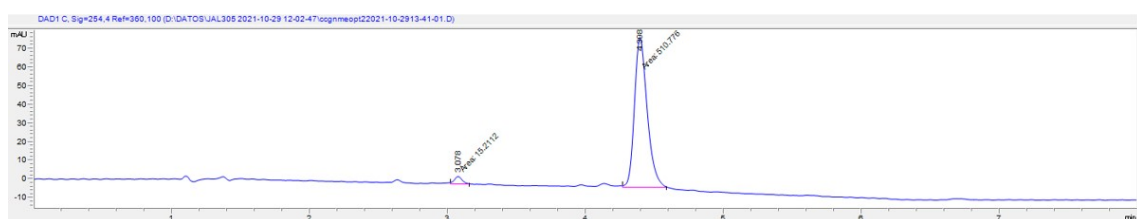

| # | Time  | Type | Area  | Height | Width  | Area%  | Symmetry |
|---|-------|------|-------|--------|--------|--------|----------|
| 1 | 3.078 | MM   | 15.2  | 4      | 0.0638 | 2.892  | 0.864    |
| 2 | 4.398 | MM   | 510.8 | 79.9   | 0.1066 | 97.108 | 0.748    |

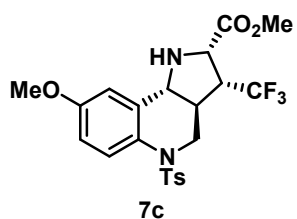

(±)-7c

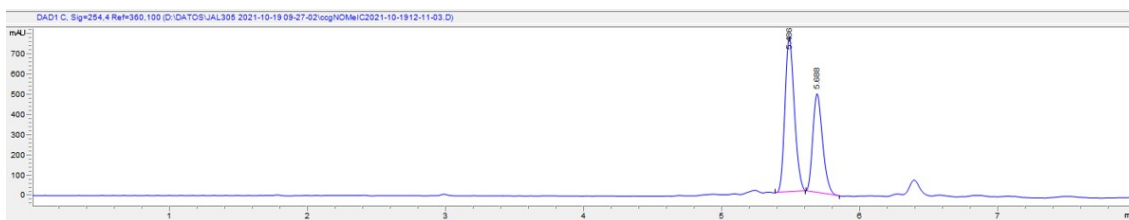

| # | Time  | Type | Area   | Height | Width  | Area%  | Symmetry |
|---|-------|------|--------|--------|--------|--------|----------|
| 1 | 5.486 | BB   | 3646.9 | 769.2  | 0.0733 | 60.069 | 0.786    |
| 2 | 5.688 | BB   | 2424.3 | 493.2  | 0.0753 | 39.931 | 0.737    |

(+)-7c; 80% ee

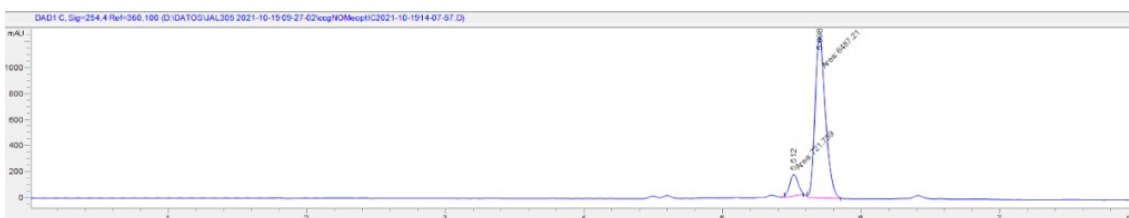

| # | Time  | Type | Area   | Height | Width  | Area%  | Symmetry |
|---|-------|------|--------|--------|--------|--------|----------|
| 1 | 5.512 | MM   | 721.7  | 167.2  | 0.0719 | 10.012 | 0.944    |
| 2 | 5.698 | MM   | 6487.2 | 1237.2 | 0.0874 | 89.988 | 0.729    |

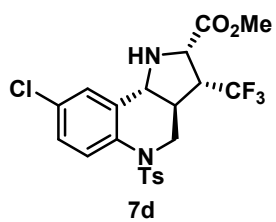

S51

(±)-7d

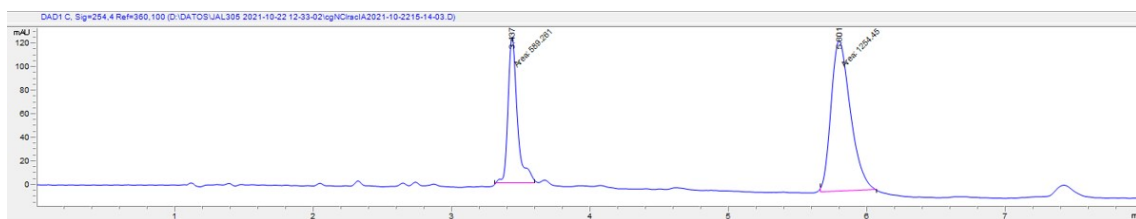

| # | Time  | Type | Area   | Height | Width  | Area%  | Symmetry |
|---|-------|------|--------|--------|--------|--------|----------|
| 1 | 3.437 | MM   | 589.3  | 125.2  | 0.0784 | 31.961 | 0.73     |
| 2 | 5.801 | MM   | 1254.5 | 128.4  | 0.1629 | 68.039 | 0.683    |

(+)-7d; 81 % ee

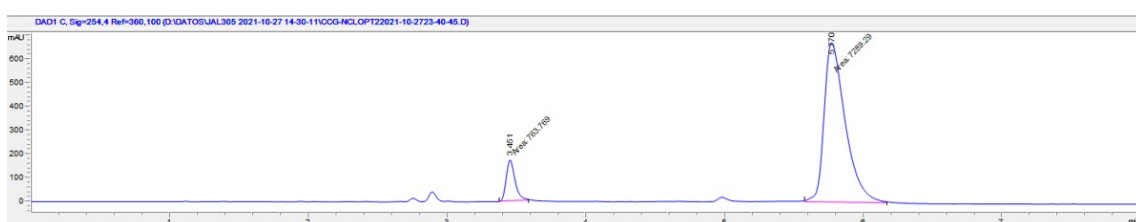

| # | Time  | Type | Area   | Height | Width  | Area%  | Symmetry |
|---|-------|------|--------|--------|--------|--------|----------|
| 1 | 3.451 | MM   | 763.8  | 173.5  | 0.0734 | 9.484  | 0.729    |
| 2 | 5.77  | MM   | 7289.3 | 681.3  | 0.1783 | 90.516 | 0.548    |

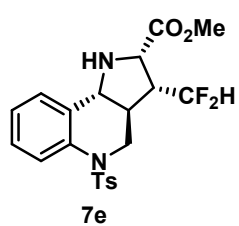

(±)-7e

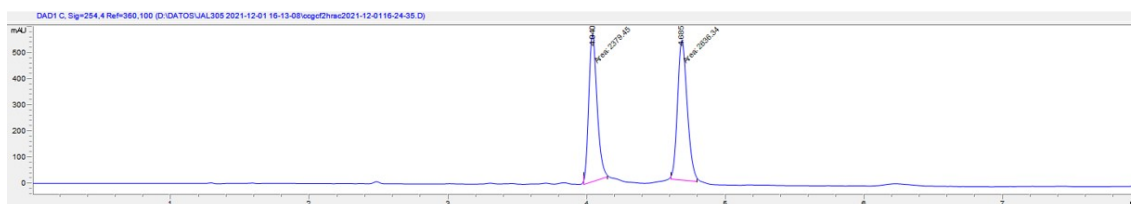

| # | Time  | Type | Area   | Height | Width  | Area%  | Symmetry |
|---|-------|------|--------|--------|--------|--------|----------|
| 1 | 4.04  | MM   | 2379.5 | 571.6  | 0.0694 | 47.439 | 0.769    |
| 2 | 4.685 | MM   | 2636.3 | 541.6  | 0.0811 | 52.561 | 0.787    |

(+)-7e; 89% ee

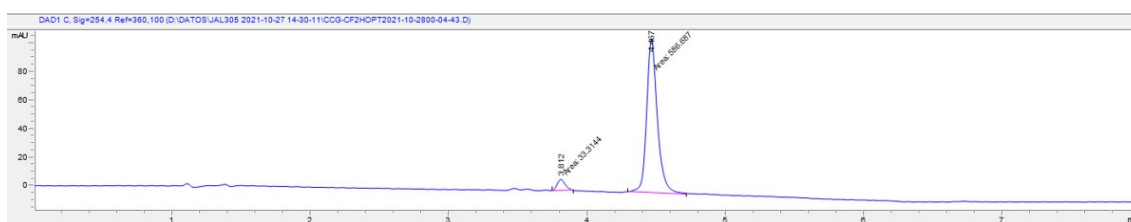

| # | Time  | Type | Area  | Height | Width  | Area%  | Symmetry |
|---|-------|------|-------|--------|--------|--------|----------|
| 1 | 3.812 | MM   | 33.3  | 8.1    | 0.0685 | 5.373  | 0.879    |
| 2 | 4.467 | MM   | 586.7 | 107.9  | 0.0906 | 94.627 | 0.782    |

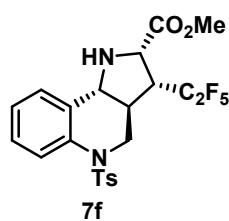

(±)-7f

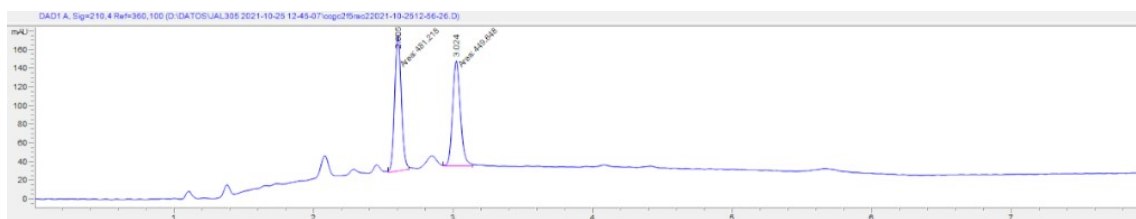

| # | Time  | Type | Area  | Height | Width  | Area%  | Symmetry |
|---|-------|------|-------|--------|--------|--------|----------|
| 1 | 2.605 | MM   | 481.2 | 145.6  | 0.0551 | 51.696 | 0.924    |
| 2 | 3.024 | MM   | 449.6 | 113.4  | 0.0661 | 48.304 | 0.858    |

(+)-7f; 92% ee

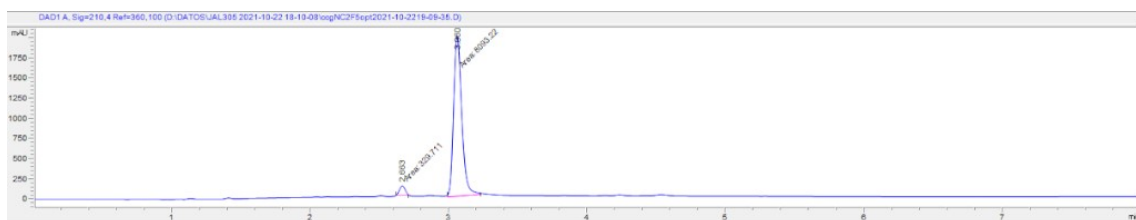

| # | Time  | Type | Area   | Height | Width  | Area%  | Symmetry |
|---|-------|------|--------|--------|--------|--------|----------|
| 1 | 2.663 | MM   | 329.7  | 115.6  | 0.0476 | 3.914  | 0.955    |
| 2 | 3.05  | MM   | 8093.2 | 1984.3 | 0.068  | 96.086 | 0.766    |

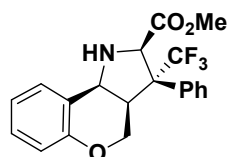

11

(±)-11

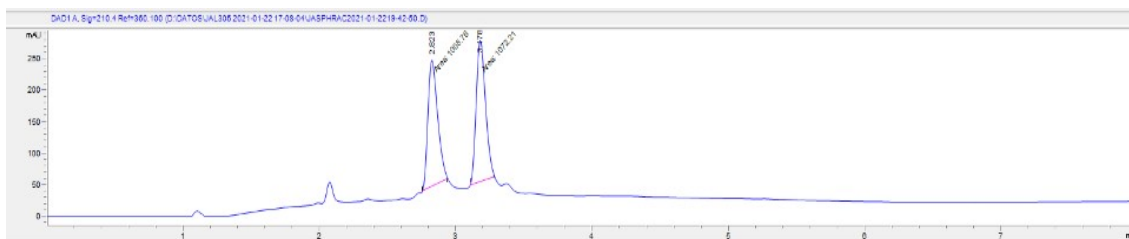

| # | Time  | Type | Area   | Height | Width  | Area%  | Symmetry |
|---|-------|------|--------|--------|--------|--------|----------|
| 1 | 2.823 | MM   | 1008.8 | 203.1  | 0.0828 | 48.476 | 0.679    |
| 2 | 3.176 | MM   | 1072.2 | 227.3  | 0.0786 | 51.524 | 0.786    |

(+)-11; 55% ee

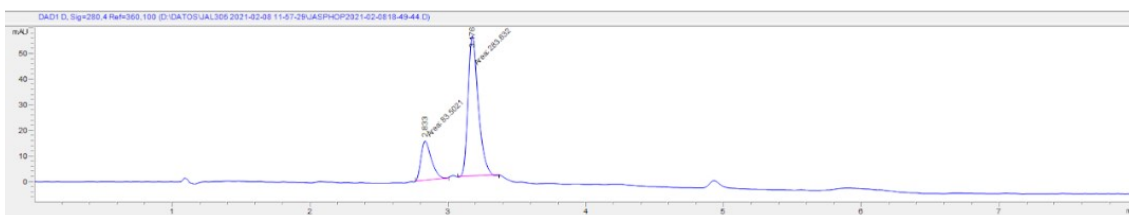

| # | Time  | Type | Area  | Height | Width  | Area%  | Symmetry |
|---|-------|------|-------|--------|--------|--------|----------|
| 1 | 2.833 | MM   | 83.5  | 15.6   | 0.0895 | 22.744 | 0.625    |
| 2 | 3.176 | MM   | 283.6 | 54.9   | 0.0861 | 77.256 | 0.686    |

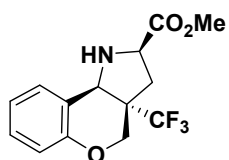

13

(±)-13

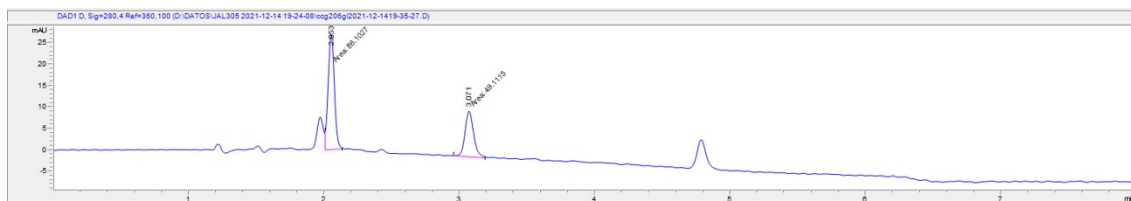

| # | Time  | Type | Area | Height | Width  | Area%  | Symmetry |
|---|-------|------|------|--------|--------|--------|----------|
| 1 | 2.053 | FM   | 86.1 | 27.4   | 0.0523 | 63.679 | 0.92     |
| 2 | 3.071 | MM   | 49.1 | 10.9   | 0.0752 | 36.321 | 0.815    |

**(+)-13**; 70% *ee*

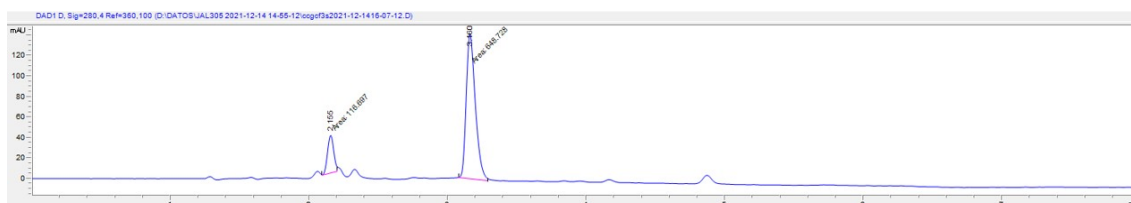

| # | Time  | Type | Area  | Height | Width  | Area%  | Symmetry |
|---|-------|------|-------|--------|--------|--------|----------|
| 1 | 2.155 | MM   | 116.7 | 37.3   | 0.0521 | 15.246 | 0.969    |
| 2 | 3.16  | MM   | 648.7 | 142.5  | 0.0759 | 84.754 | 0.684    |

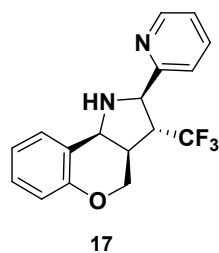



(±)-17

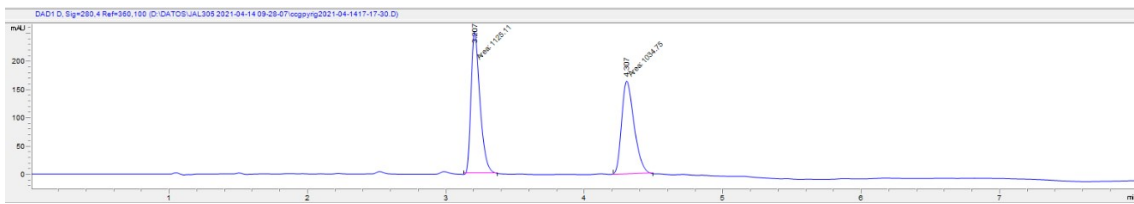

| # | Time  | Type | Area   | Height | Width  | Area%  | Symmetry |
|---|-------|------|--------|--------|--------|--------|----------|
| 1 | 3.207 | MM   | 1125.1 | 251.7  | 0.0745 | 52.092 | 0.656    |
| 2 | 4.307 | MM   | 1034.7 | 165    | 0.1045 | 47.908 | 0.681    |

(+)-17; 53% ee

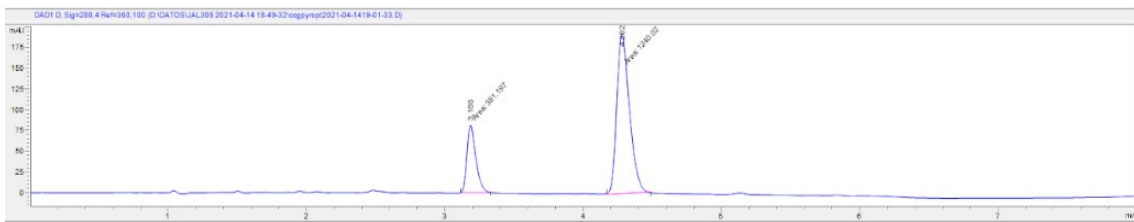

| # | Time  | Type | Area  | Height | Width  | Area%  | Symmetry |
|---|-------|------|-------|--------|--------|--------|----------|
| 1 | 3.186 | MM   | 381.2 | 83.4   | 0.0761 | 23.513 | 0.659    |
| 2 | 4.282 | MM   | 1240  | 193.2  | 0.107  | 76.487 | 0.672    |

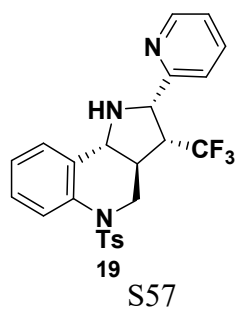

(±)-19

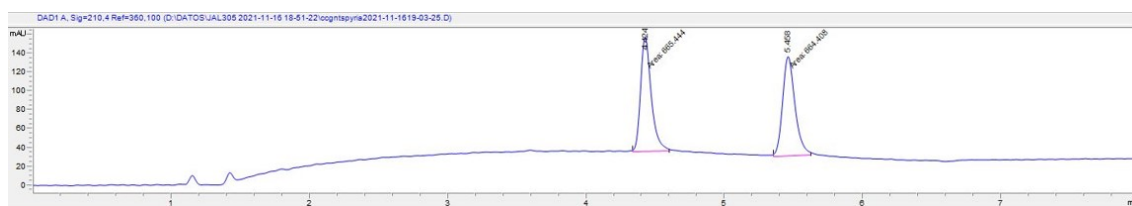

| # | Time  | Type | Area  | Height | Width  | Area%  | Symmetry |
|---|-------|------|-------|--------|--------|--------|----------|
| 1 | 4.424 | MM   | 665.4 | 123.2  | 0.09   | 50.039 | 0.706    |
| 2 | 5.458 | MM   | 664.4 | 106.4  | 0.1041 | 49.961 | 0.782    |

(+)-19; 56% ee

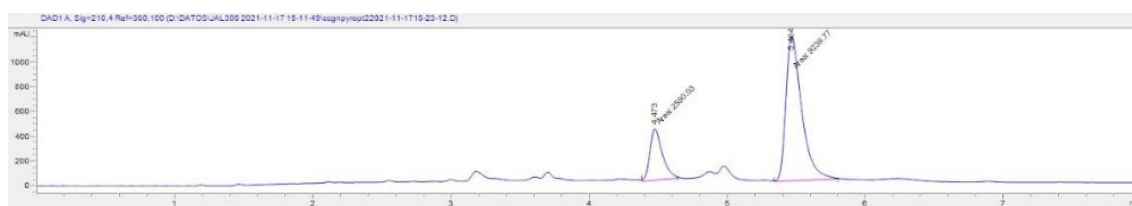

| # | Time  | Type | Area   | Height | Width  | Area%  | Symmetry |
|---|-------|------|--------|--------|--------|--------|----------|
| 1 | 4.473 | MM   | 2590   | 414.4  | 0.1042 | 21.894 | 0.646    |
| 2 | 5.464 | MM   | 9239.8 | 1163.8 | 0.1323 | 78.106 | 0.565    |

## 9. NMR Spectra collection

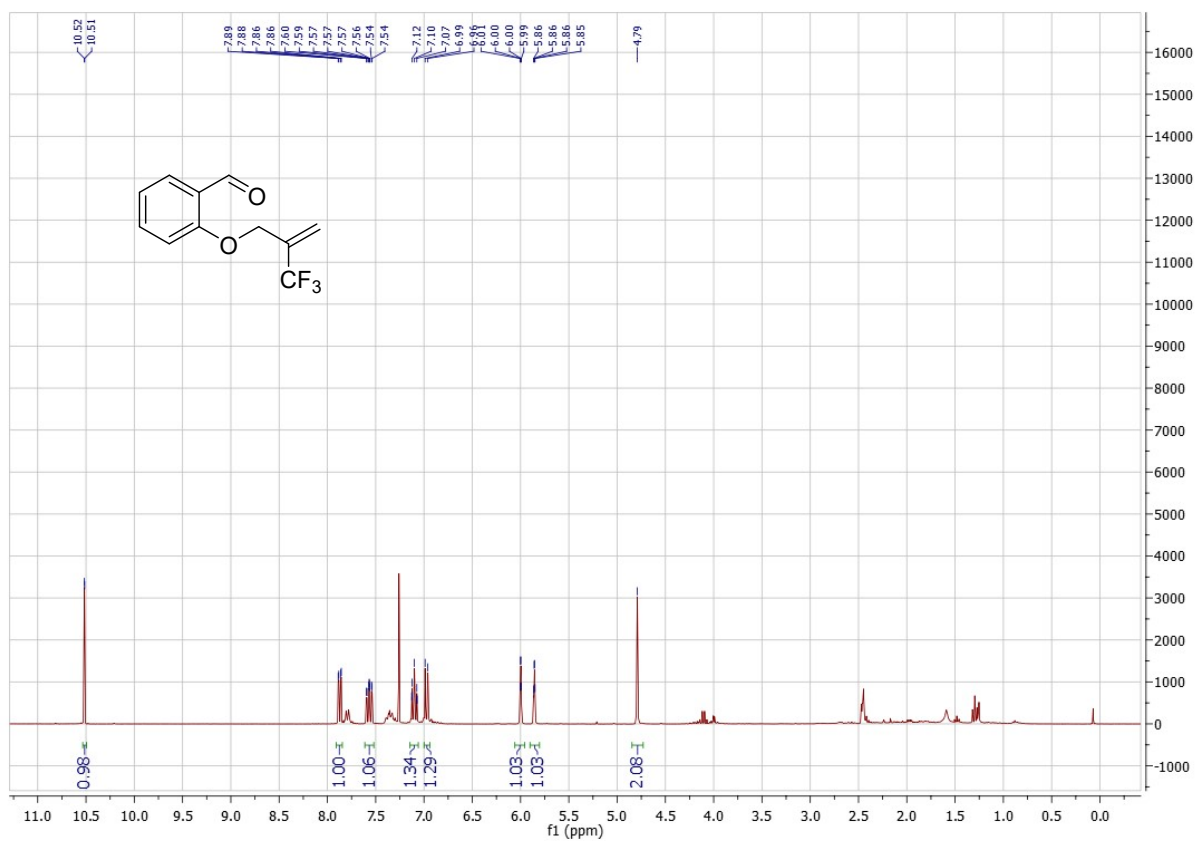

2-((2-(Trifluoromethyl)allyl)oxy)benzaldehyde:

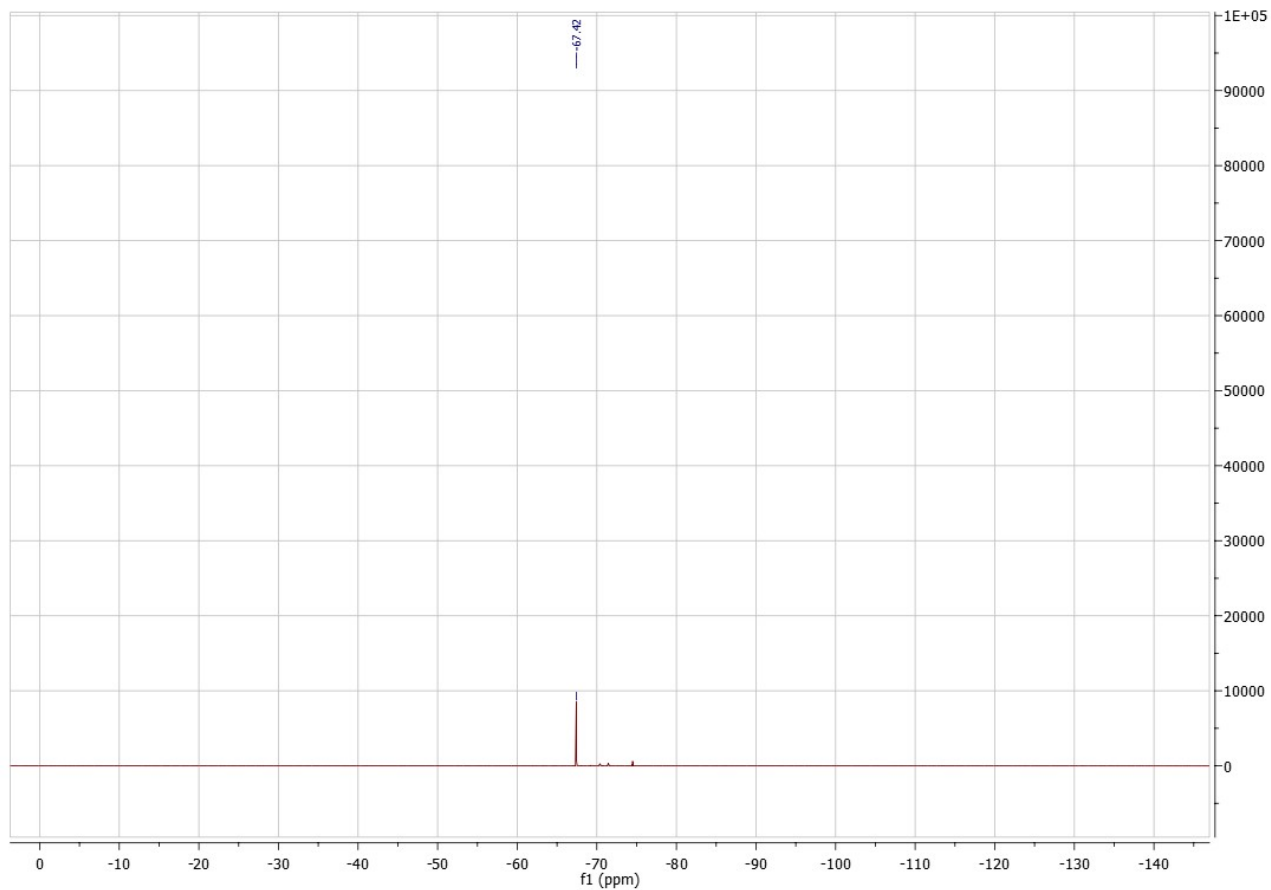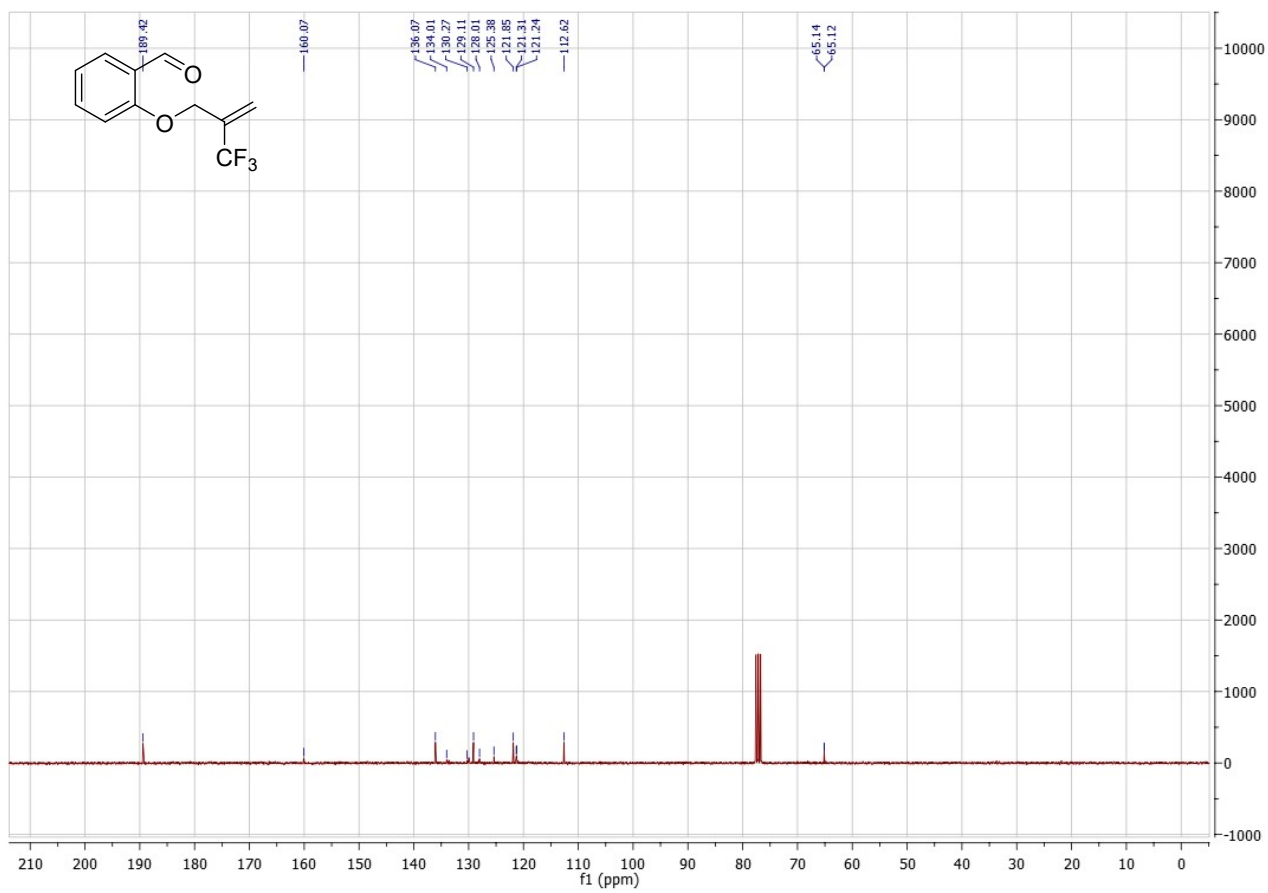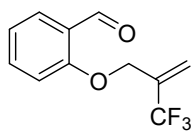

S60

**(E)-3,5-dichloro-2-((4,4,4-trifluorobut-2-en-1-yl)oxy)benzaldehyde**

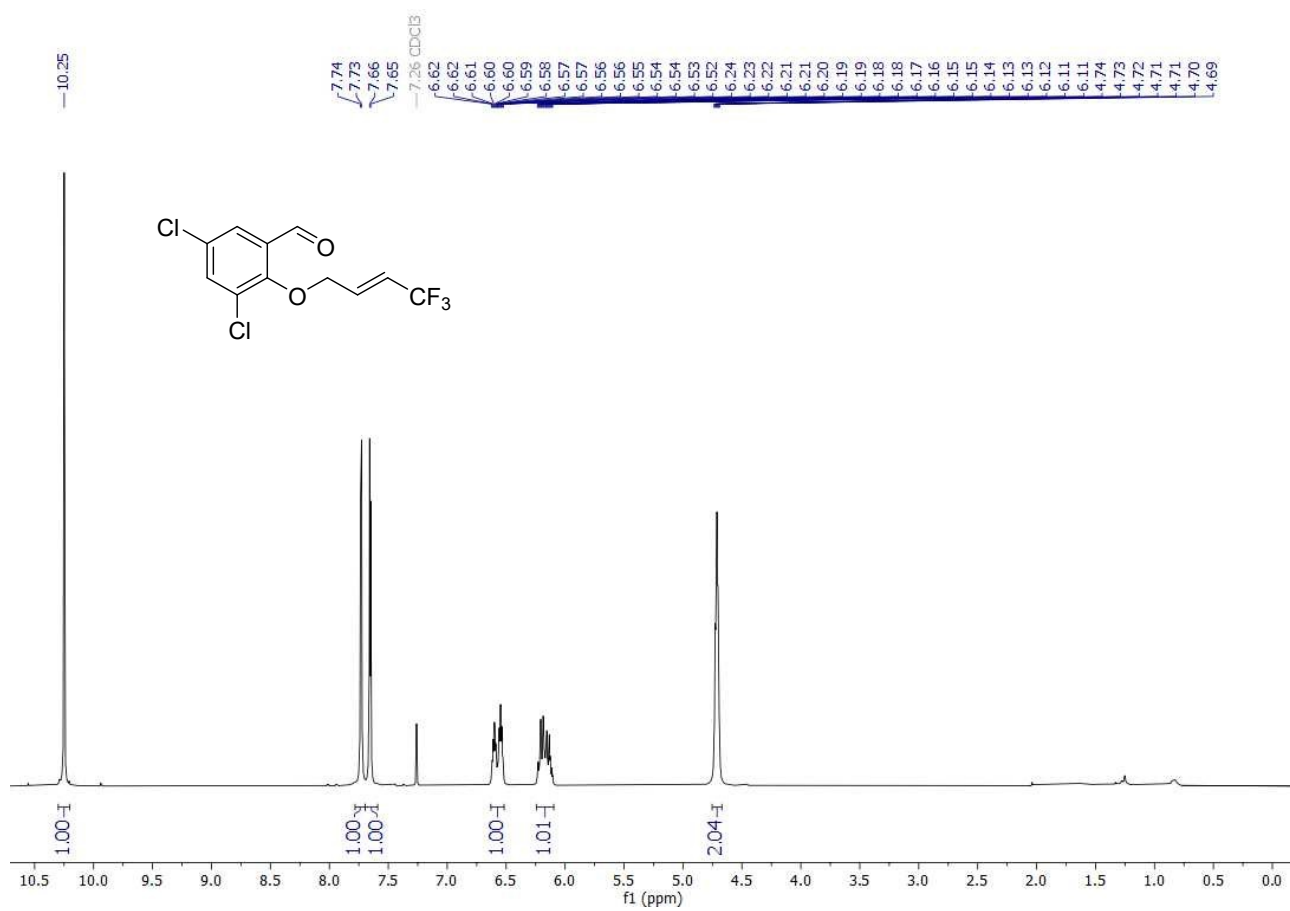

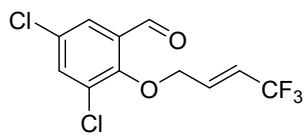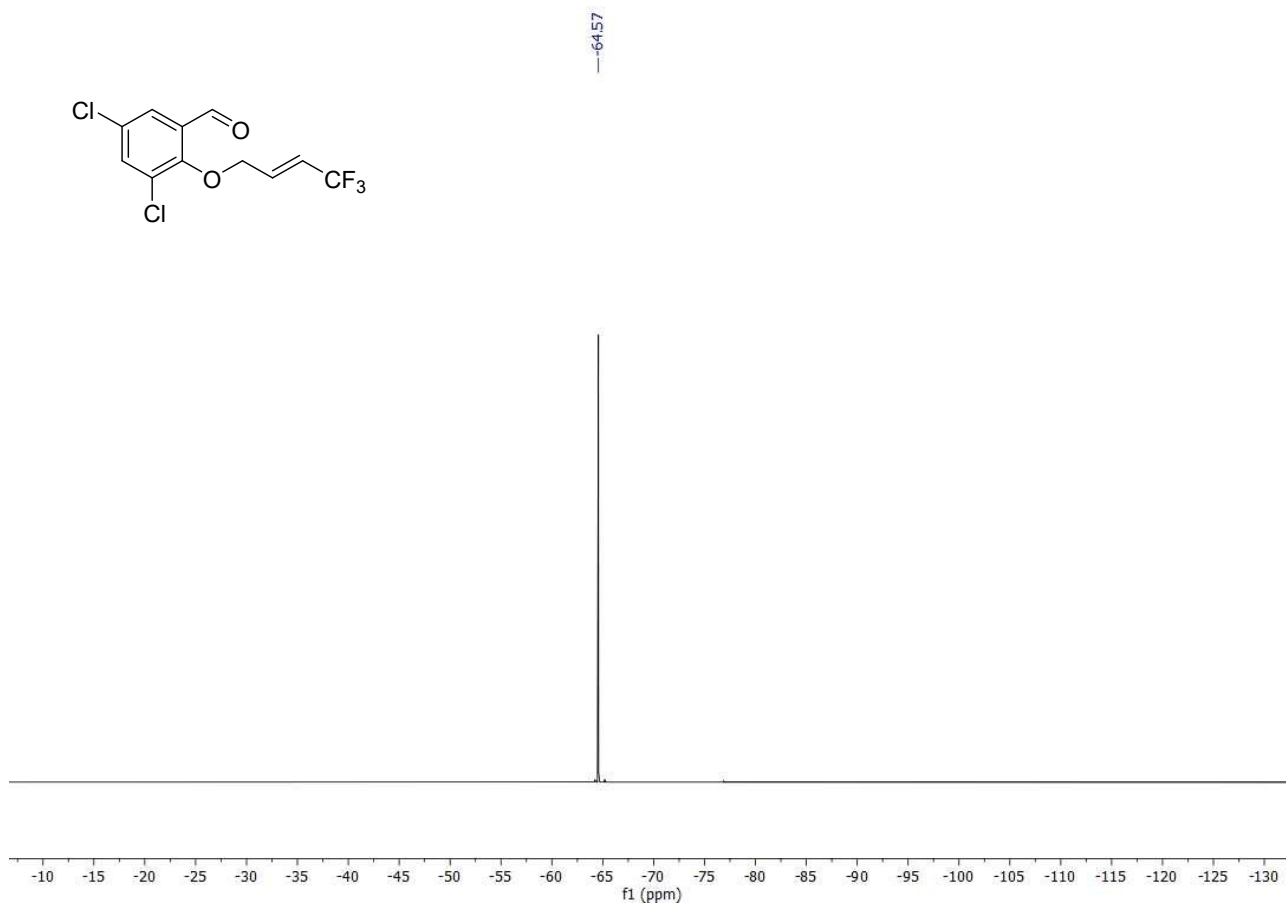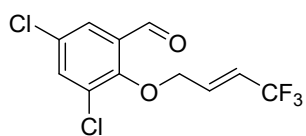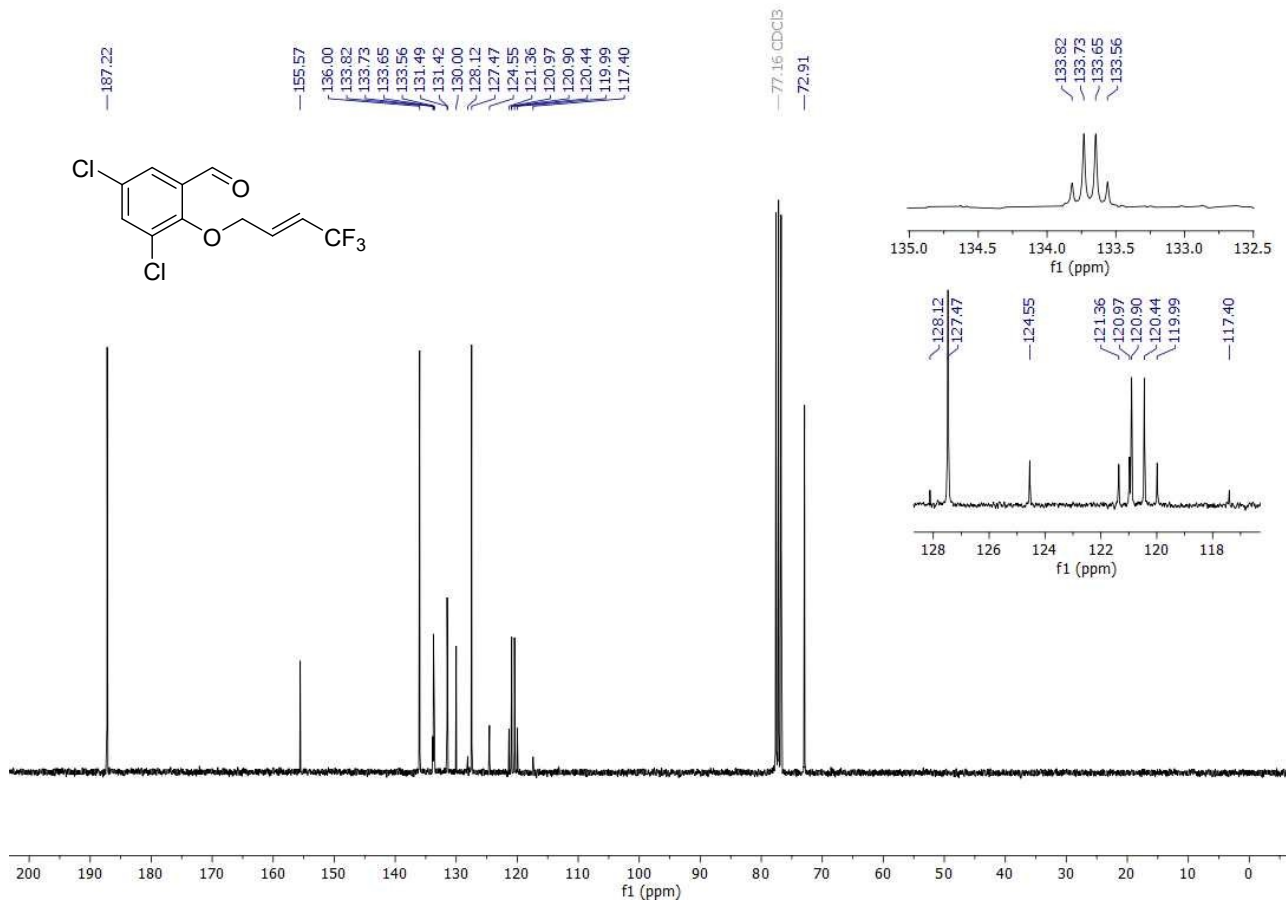

(E)-2-((4,4,4-trifluorobut-2-en-1-yl)oxy)thiophene-3-carbaldehyde:

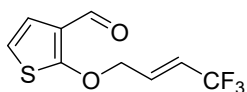

—64.58

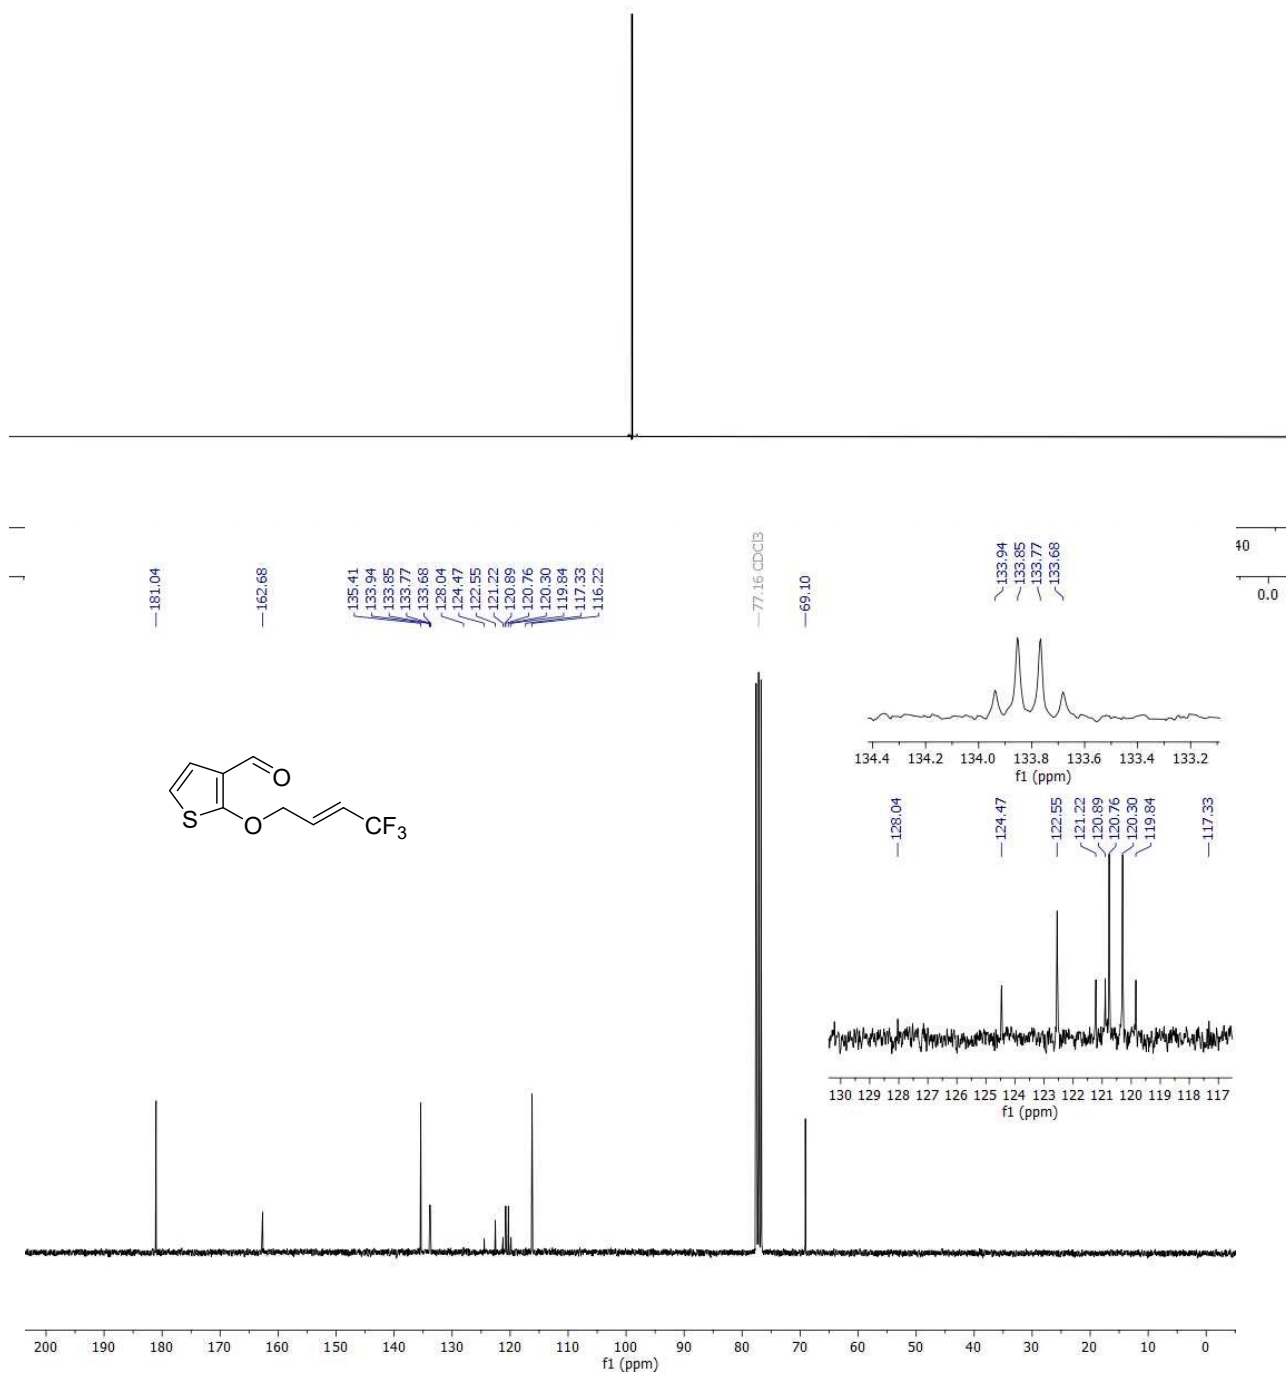

**Methyl 2-(2-((*E*)-4,4,4-trifluorobut-2-en-1-yloxy)benzylideneamino)acetate (1a)**

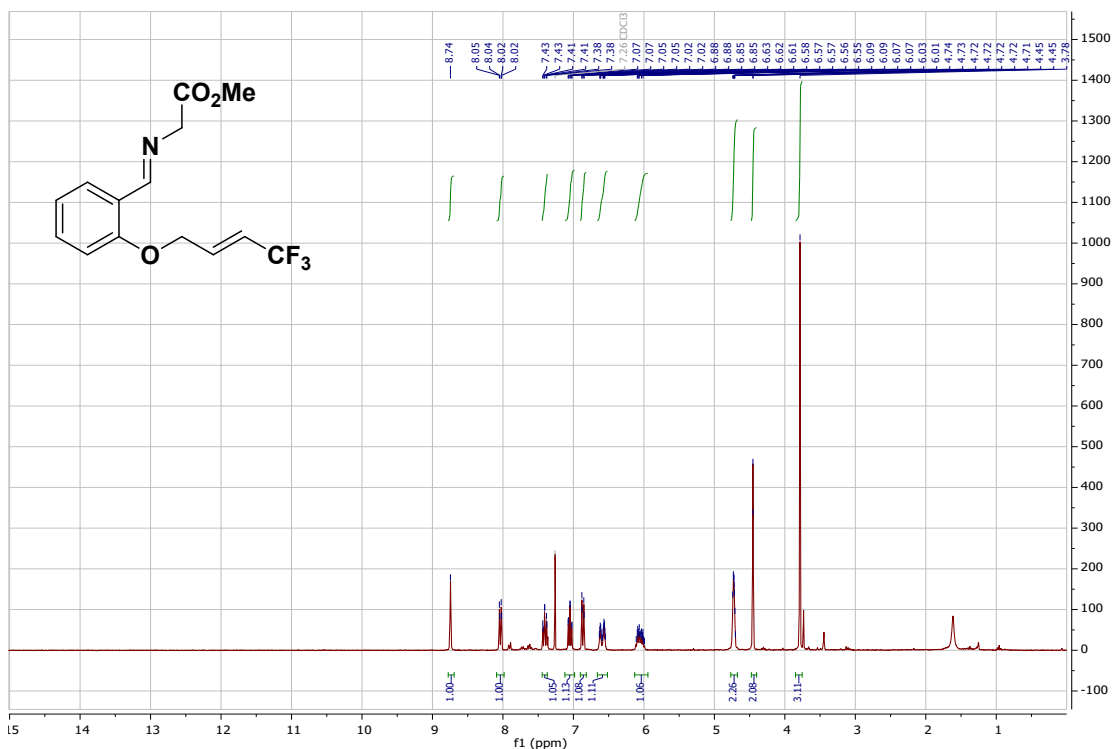

**Methyl 2-(5-methyl-2-((*E*)-4,4,4-trifluorobut-2-en-1-yloxy)benzylideneamino)acetate (1b)**

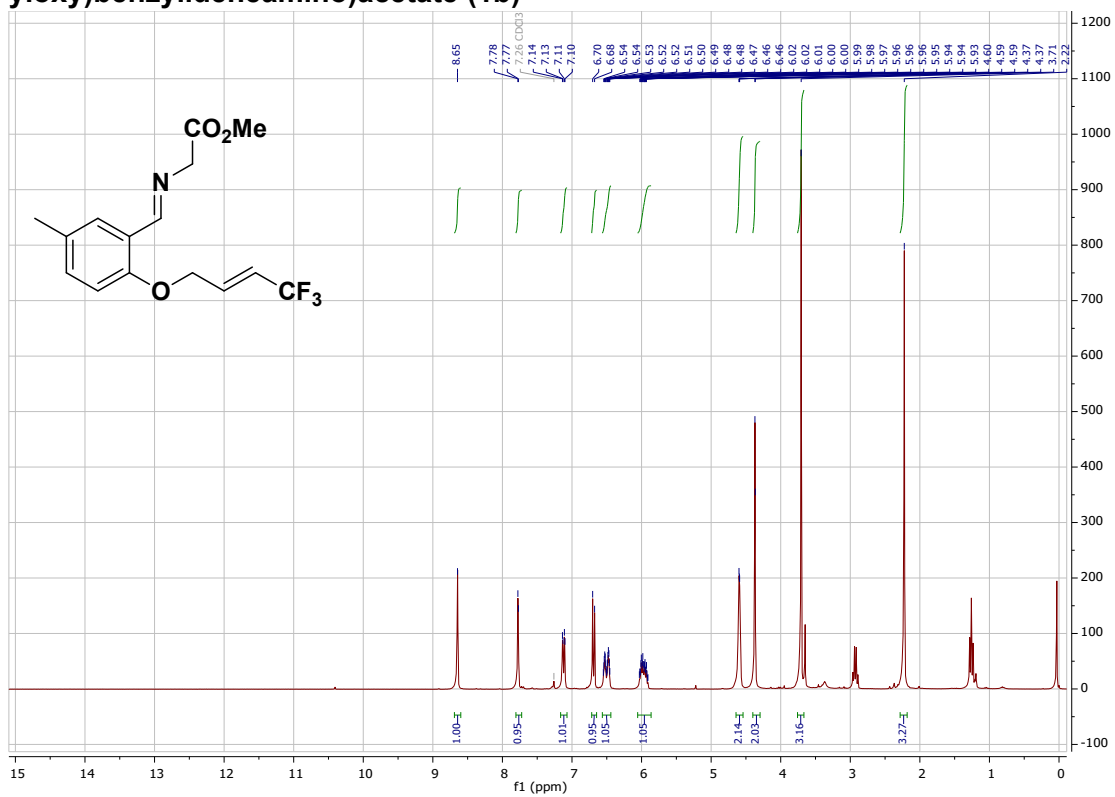



**Methyl 2-(5-methoxy-2-((E)-4,4,4-trifluorobut-2-en-1-yloxy)benzylideneamino)acetate (1c)**

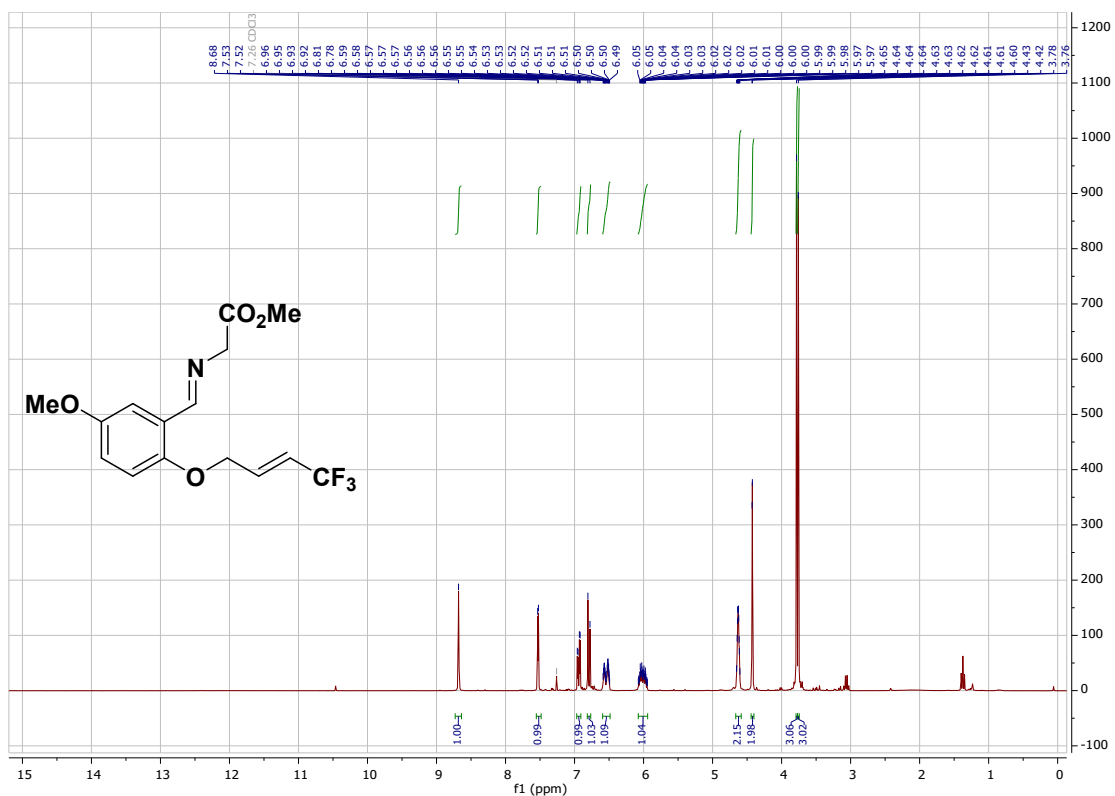

**Methyl 2-(4-methoxy-2-((E)-4,4,4-trifluorobut-2-en-1-yloxy)benzylideneamino)acetate (1d)**

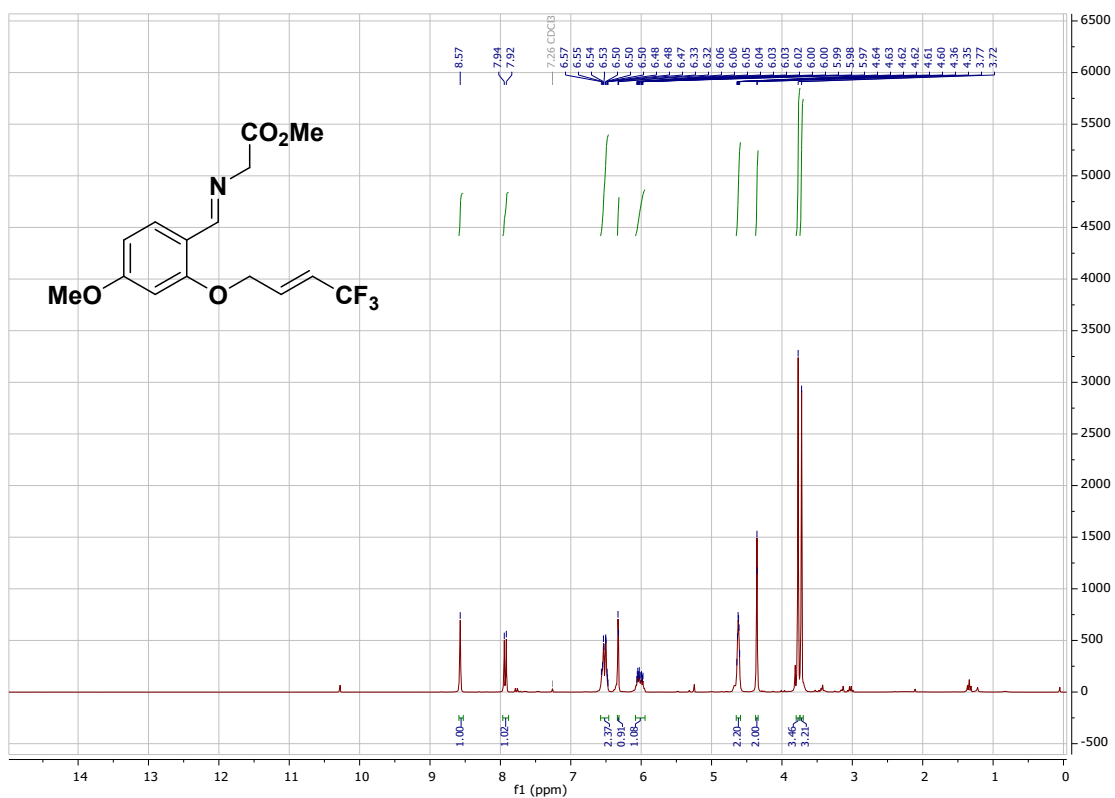

**Methyl 2-(3-methoxy-2-((E)-4,4,4-trifluorobut-2-en-1-yloxy)benzylideneamino)acetate (1e)**

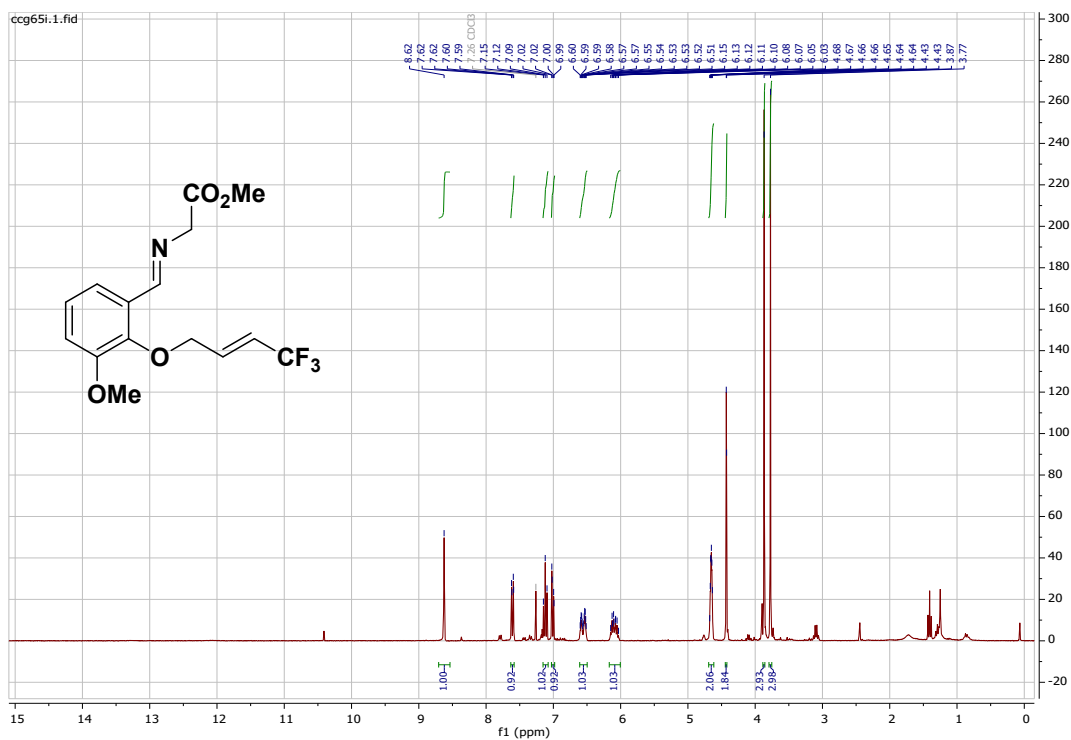

**Methyl 2-(5-chloro-2-((E)-4,4,4-trifluorobut-2-en-1-yloxy)benzylideneamino)acetate (1f)**

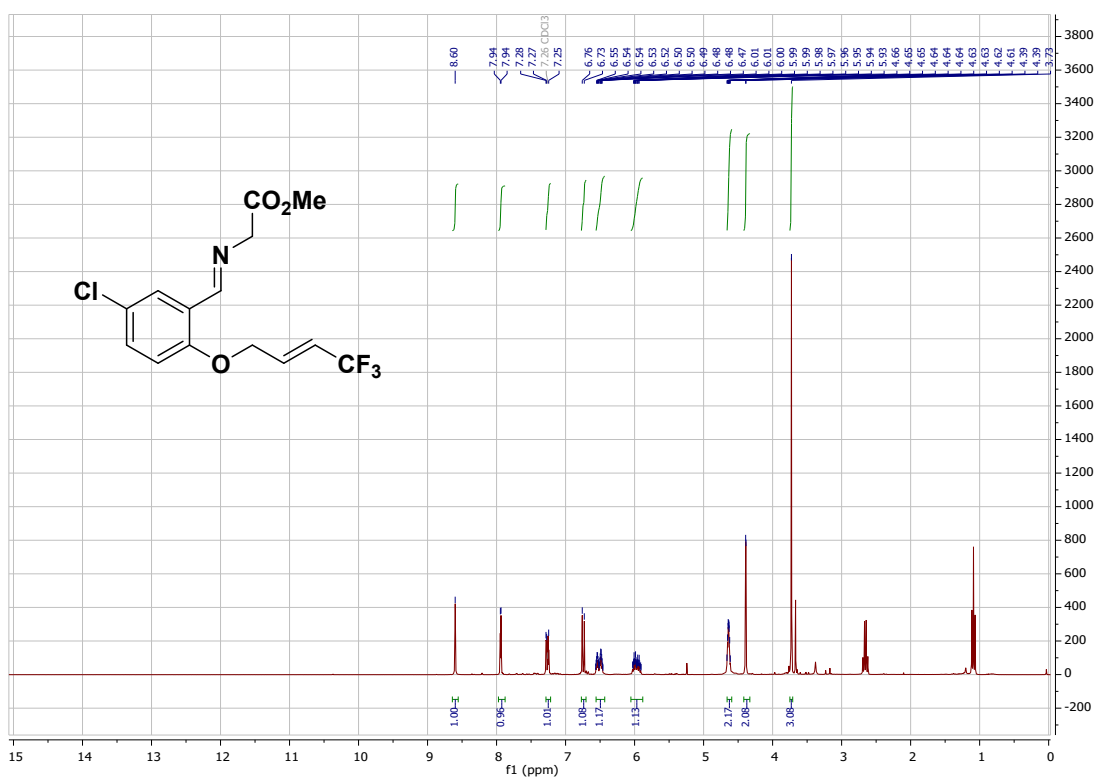

**Methyl 2-(3,5-dichloro-2-((E)-4,4,4-trifluorobut-2-en-1-yloxy)benzylideneamino)acetate (1g)**

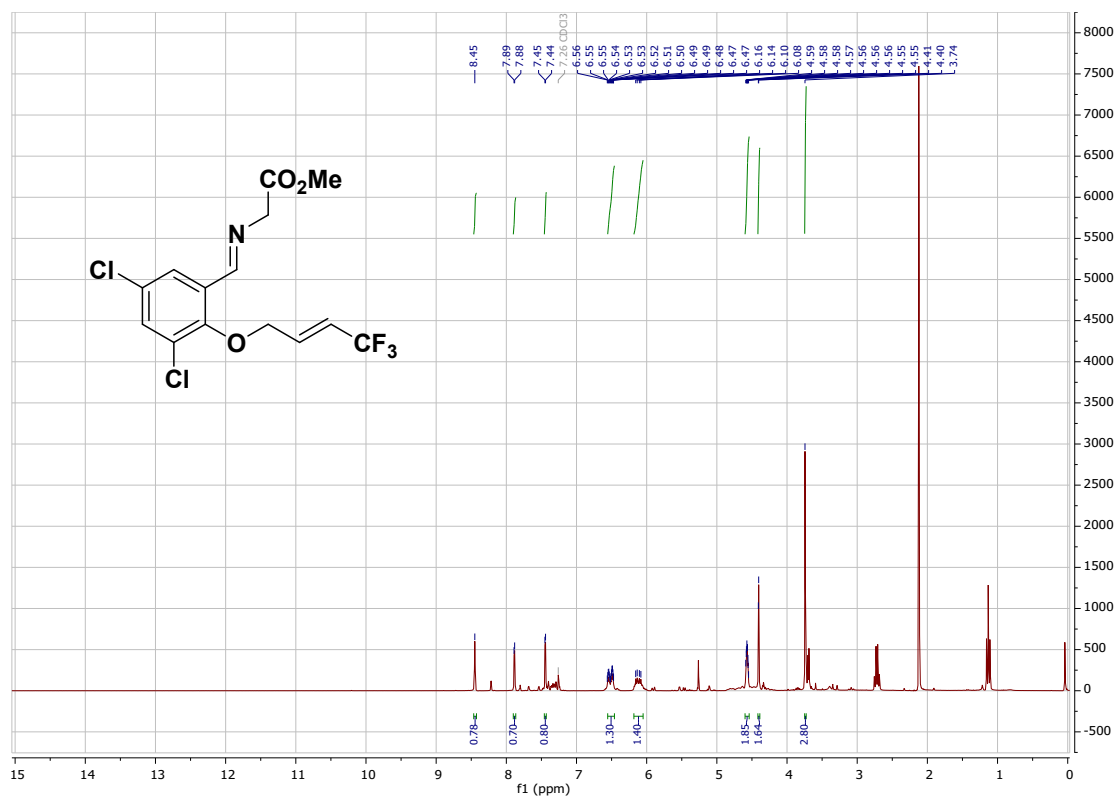

**Methyl 2-(4-bromo-2-((E)-4,4,4-trifluorobut-2-en-1-yloxy)benzylideneamino)acetate (1h)**

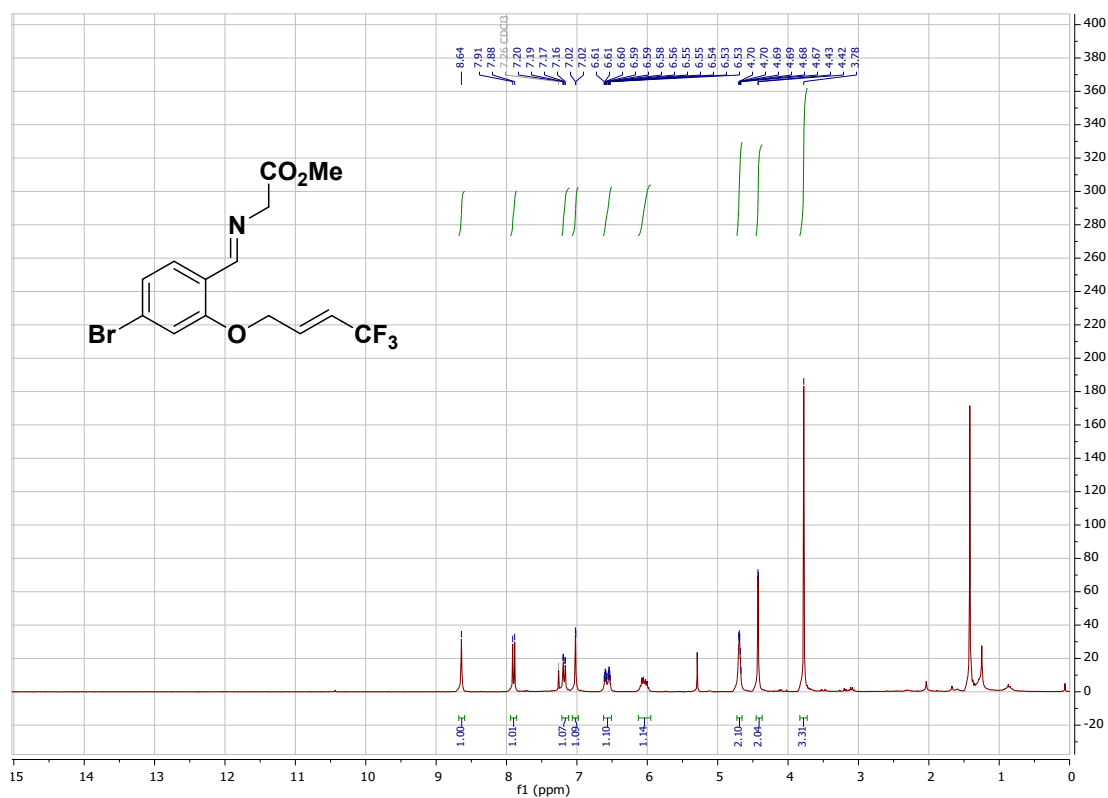

**Methyl 2-(2-((*E*)-4,4,4-trifluorobut-2-en-1-yloxy)thiophen-3-ylmethyleneamino)acetate (1i)**

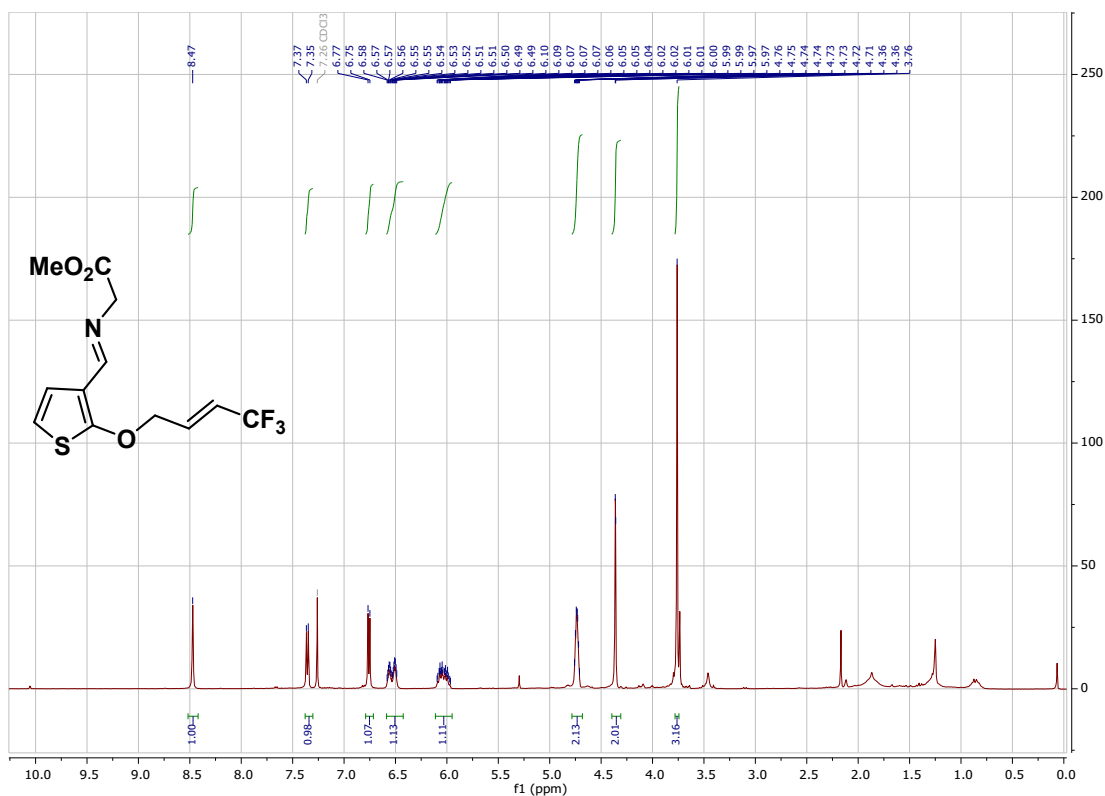

**Methyl 2-(2-(4-methyl-*N*-((*E*)-4,4,4-trifluorobut-2-en-1-yl)phenylsulfonamido)benzylideneamino)acetate (6a)**

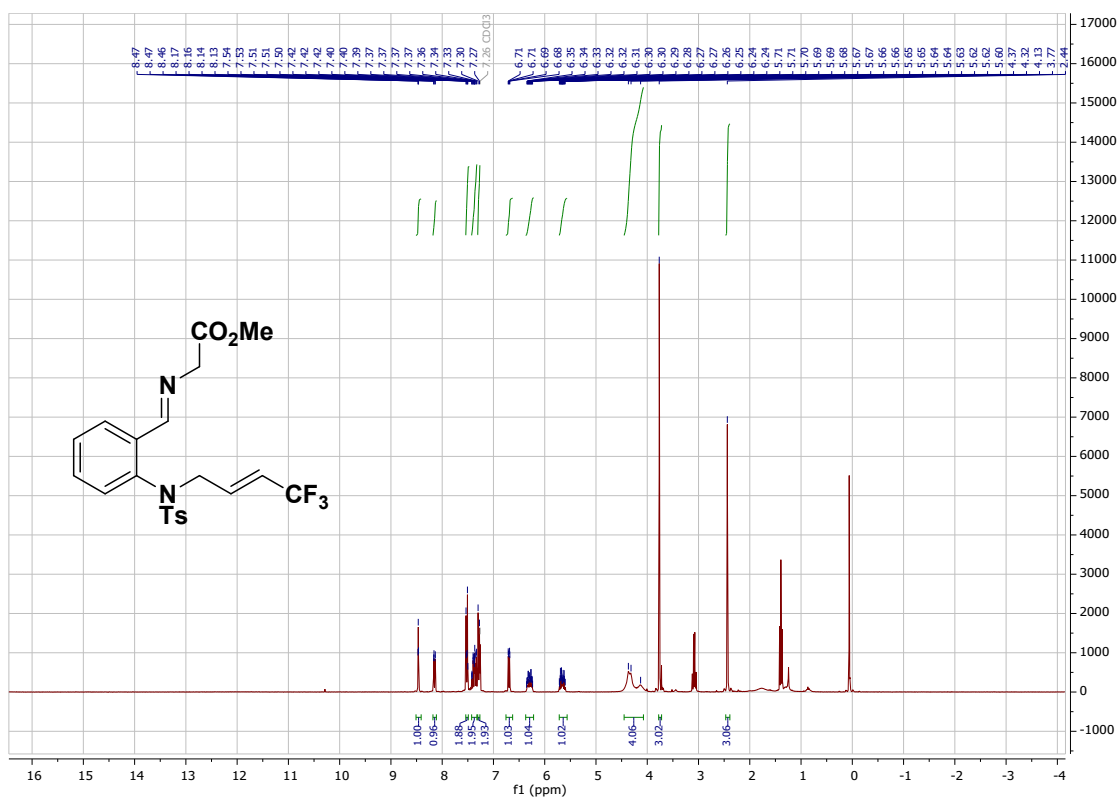

**Methyl 2-(5-methyl-2-(4-methyl-*N*-((*E*)-4,4,4-trifluorobut-2-en-1-yl)phenylsulfonamido)benzylideneamino)acetate (6b)**

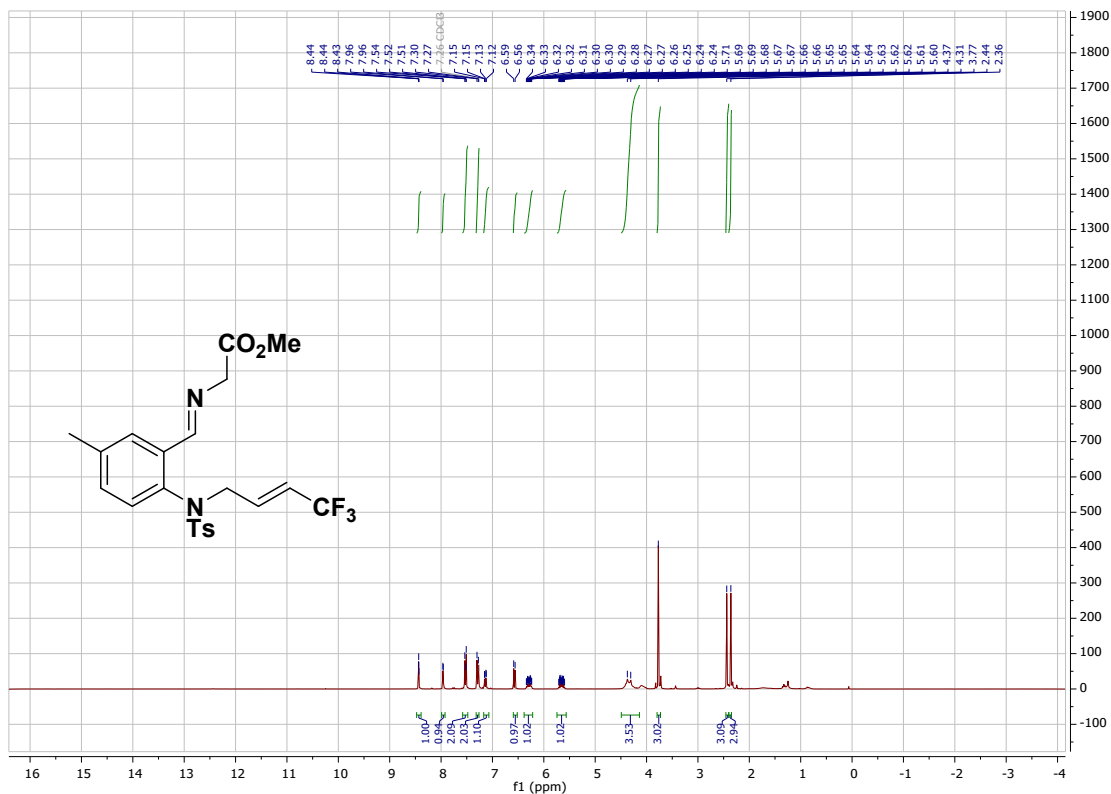

**Methyl 2-(5-methoxy-2-(4-methyl-*N*-((*E*)-4,4,4-trifluorobut-2-en-1-yl)phenylsulfonamido)benzylideneamino)acetate (6c)**

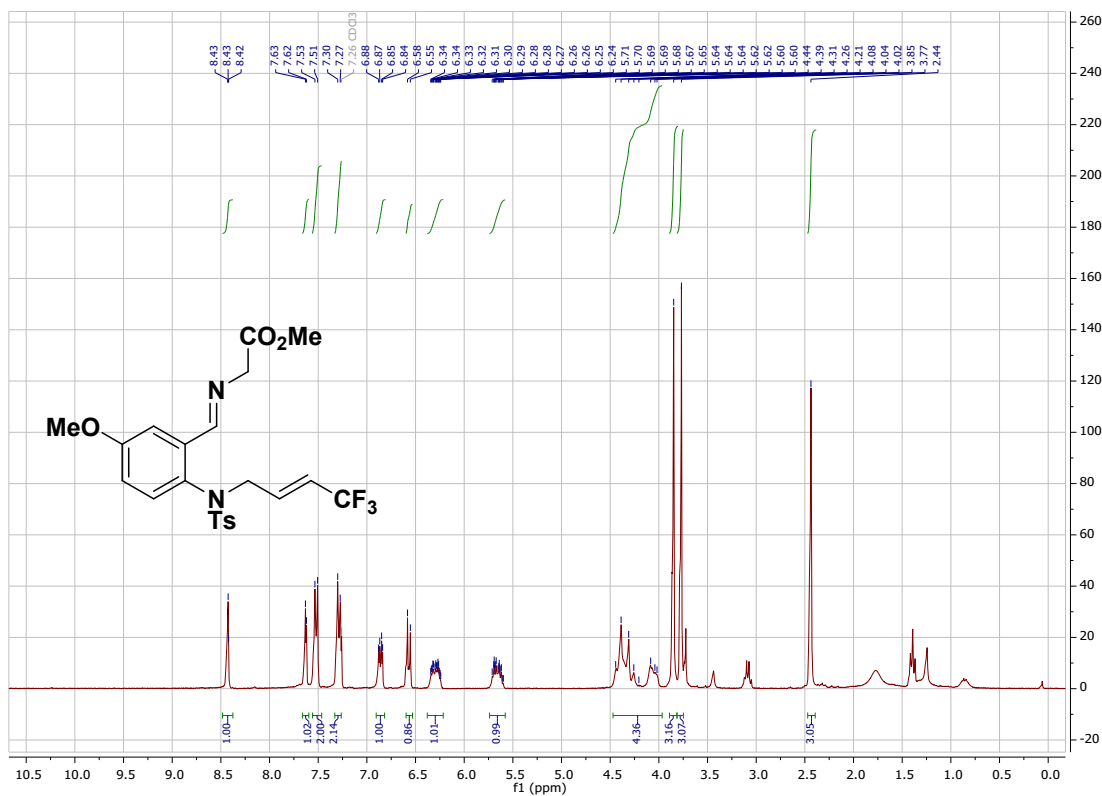

**Methyl 2-(5-chloro-2-(4-methyl-*N*-((*E*)-4,4,4-trifluorobut-2-en-1-yl)phenylsulfonamido)benzylideneamino)acetate (6d)**

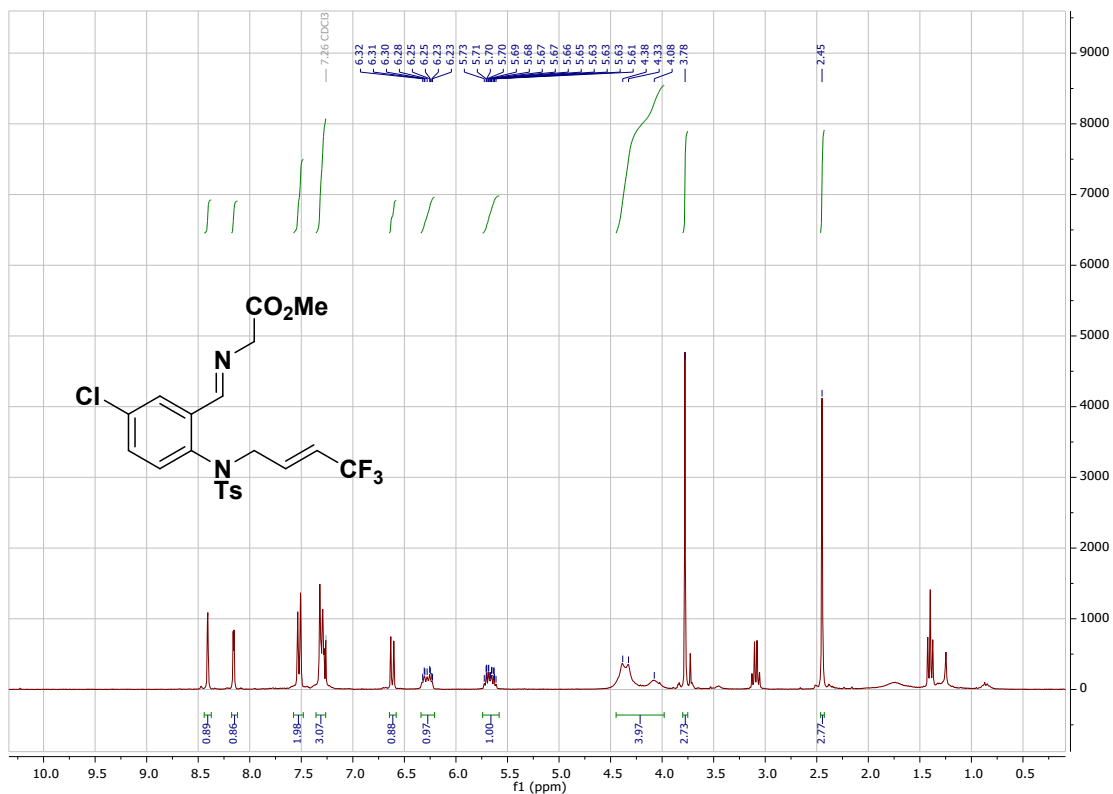

**Methyl 2-(2-(*N*-((*E*)-4,4-difluorobut-2-en-1-yl)-4-methylphenylsulfonamido)benzylideneamino)acetate (6e)**

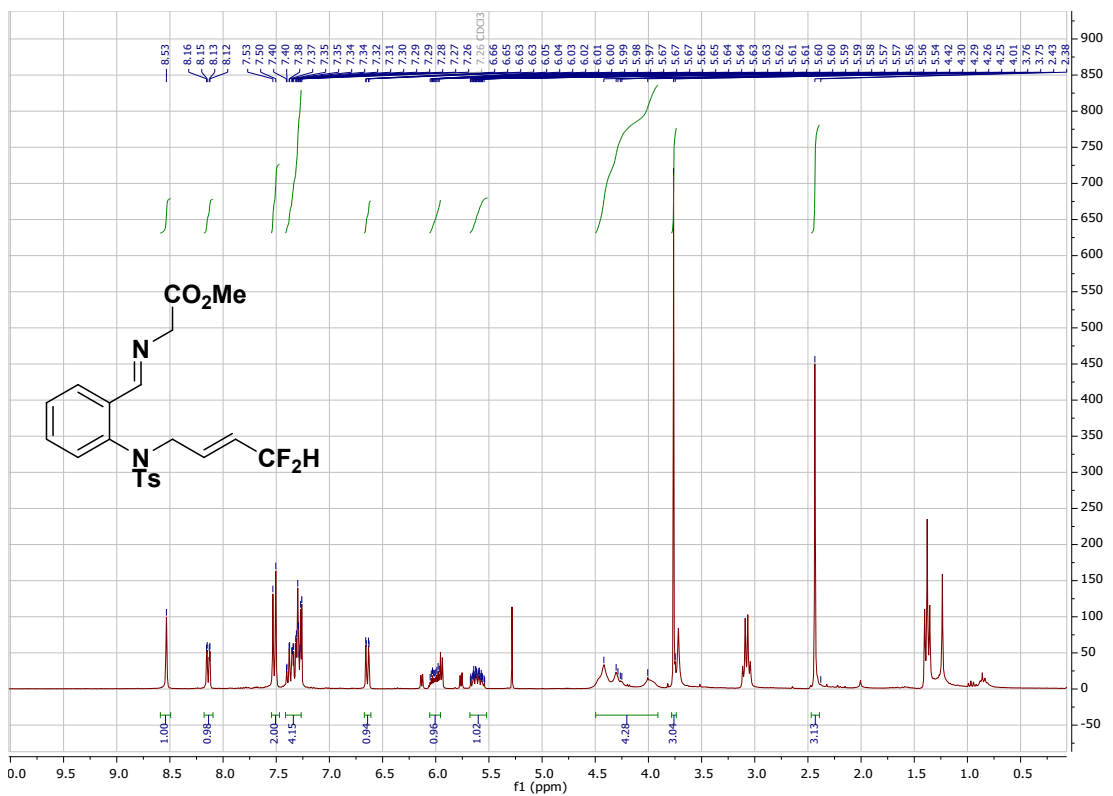

**Methyl 2-(2-(4-methyl-N-((E)-4,4,5,5,5-pentafluoropent-2-en-1-yl)phenylsulfonamido)benzylideneamino)acetate (6f)**

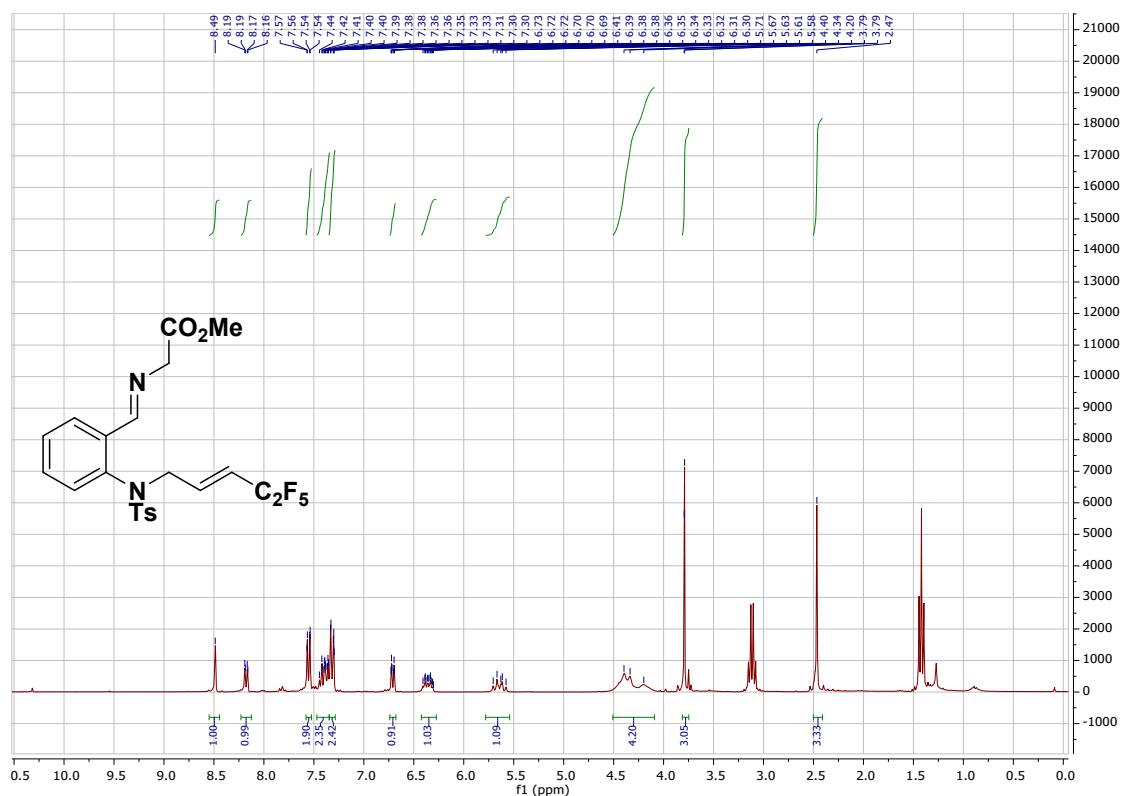

**Methyl 2-(2-((E)-4,4,4-trifluoro-3-phenylbut-2-en-1-yloxy)benzylideneamino)acetate (10)**

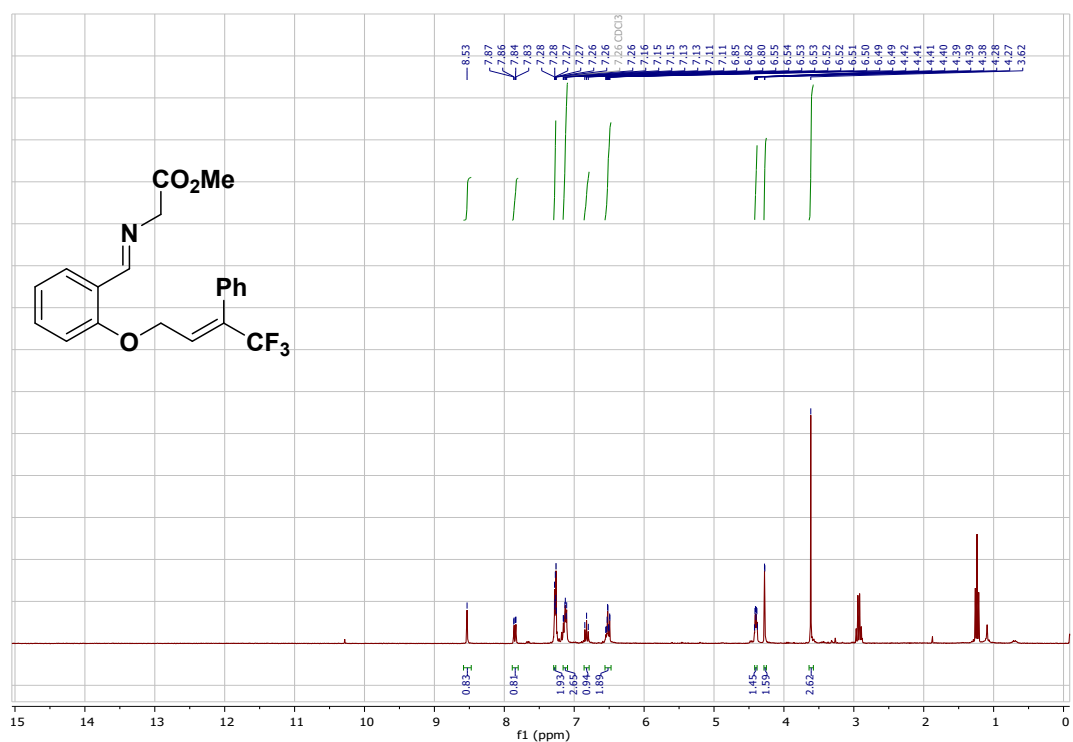

### Methyl 2-(2-(2-trifluoromethylallyloxy)benzylideneamino)acetate (12)

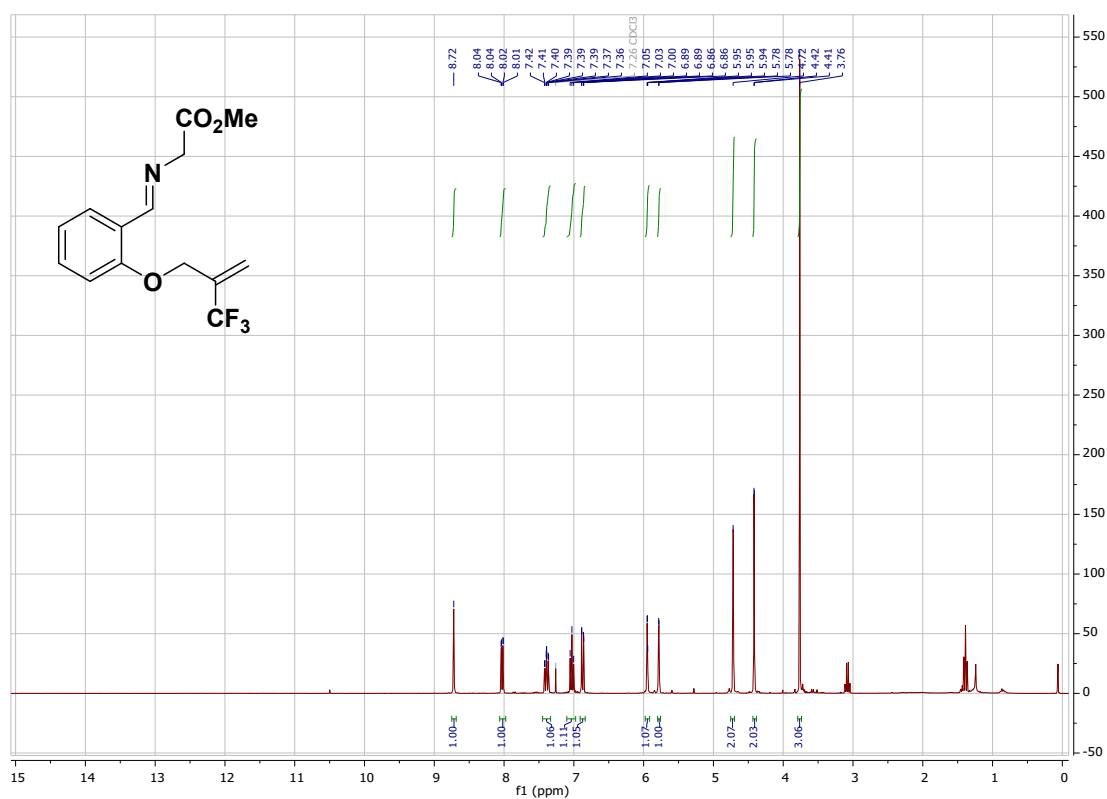

### Methyl 2-(2-((E)-2-butenyloxy)benzylideneamino)acetate (14)

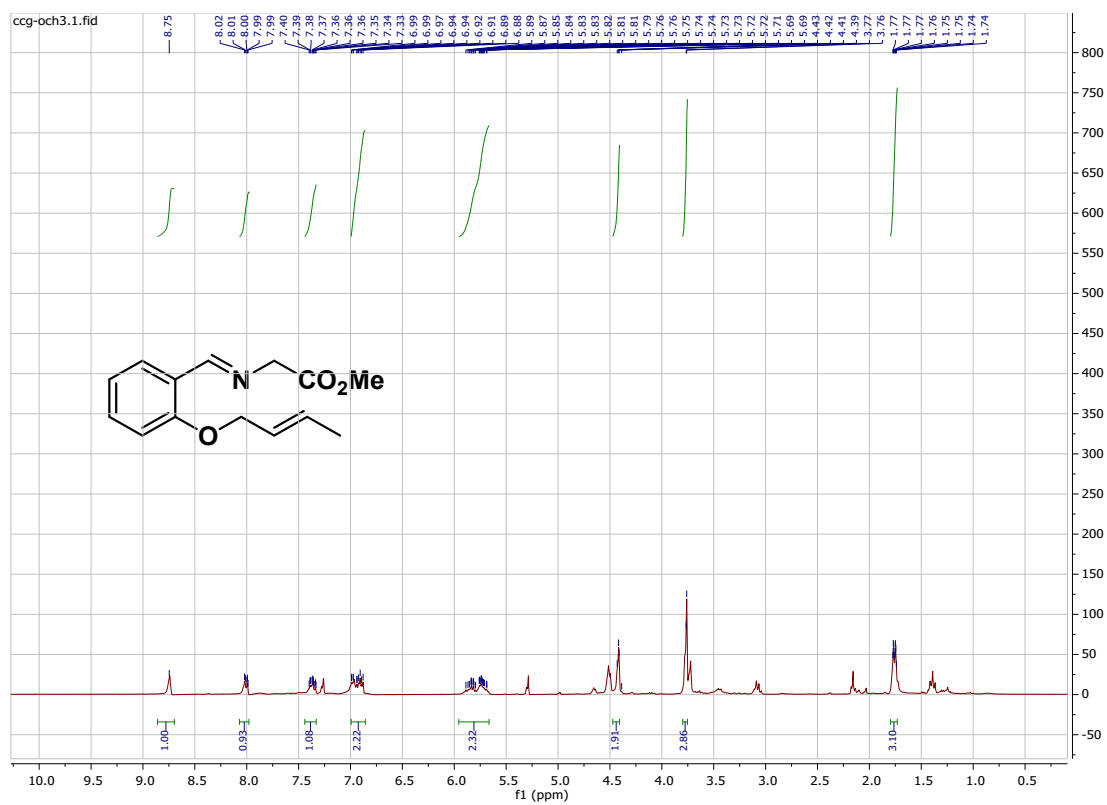



***N*-(pyridin-2-ylmethyl)-1-(2-(4,4,4-trifluorobut-2-en-1-yloxy)phenyl)methanimine (16)**

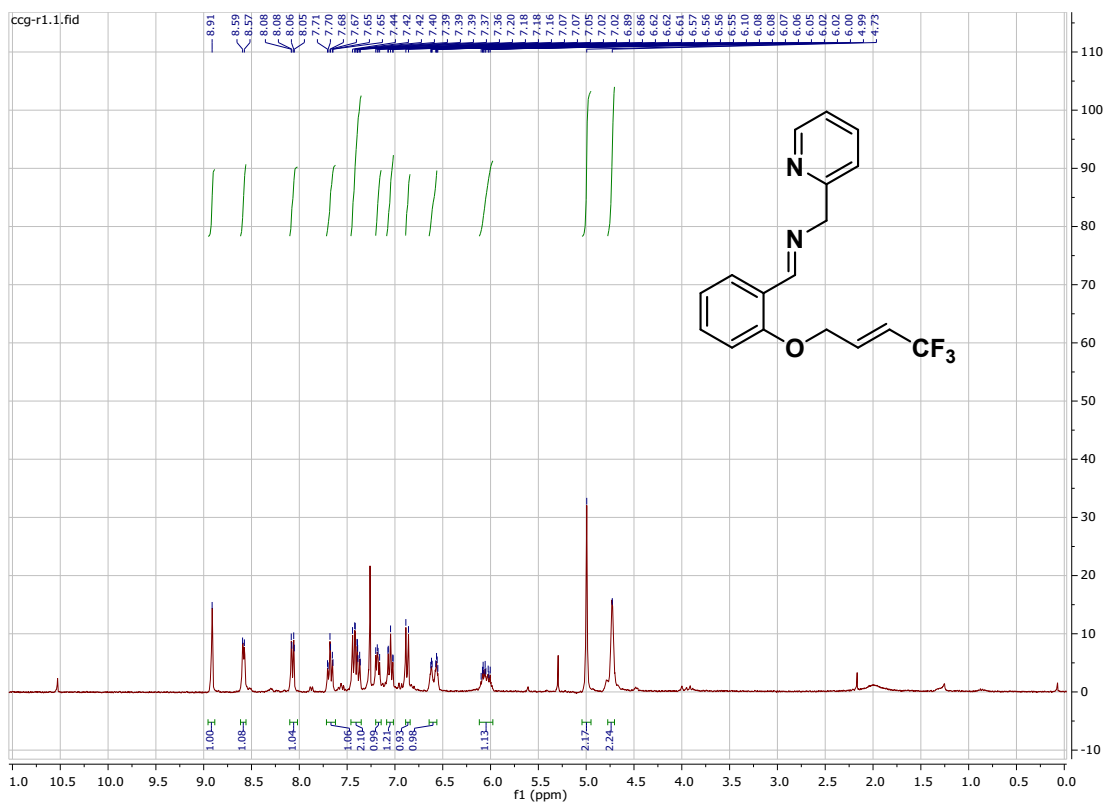

**4-methyl-*N*-(2-(pyridin-2-ylmethyl)iminomethylphenyl)-*N*-((*E*)-4,4,4-trifluorobut-2-en-1-yl)benzenesulfonamide (18)**

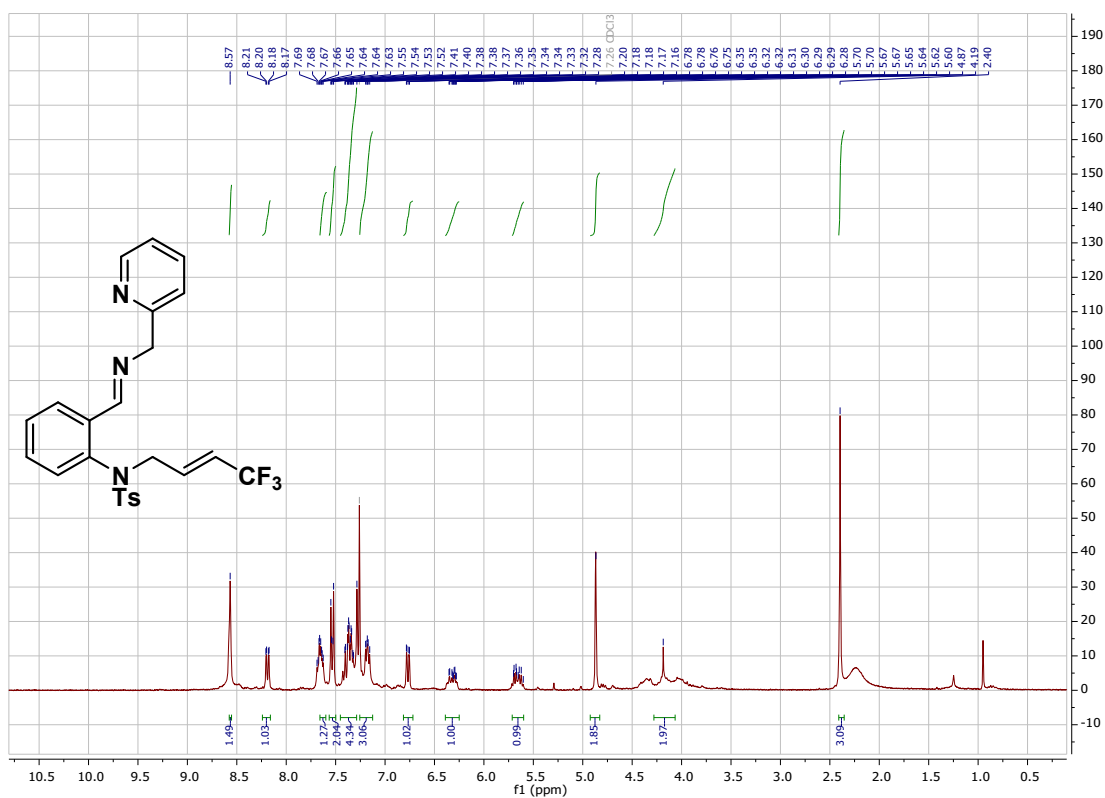

**Methyl (2*R*,3*R*,3*aR*,9*bS*)-3-trifluoromethyl-1,2,3,3*a*,4,9*b*-hexahydrochromeno[4,3-*b*]pyrrole-2-carboxylate (2a)**

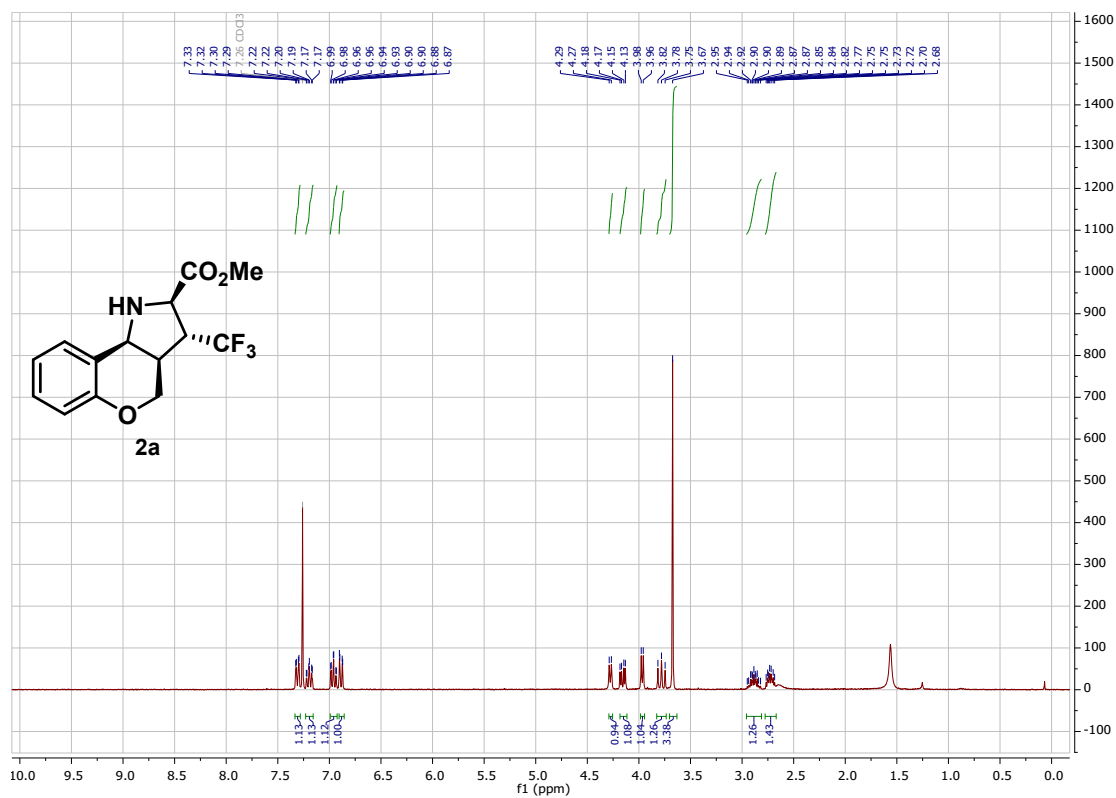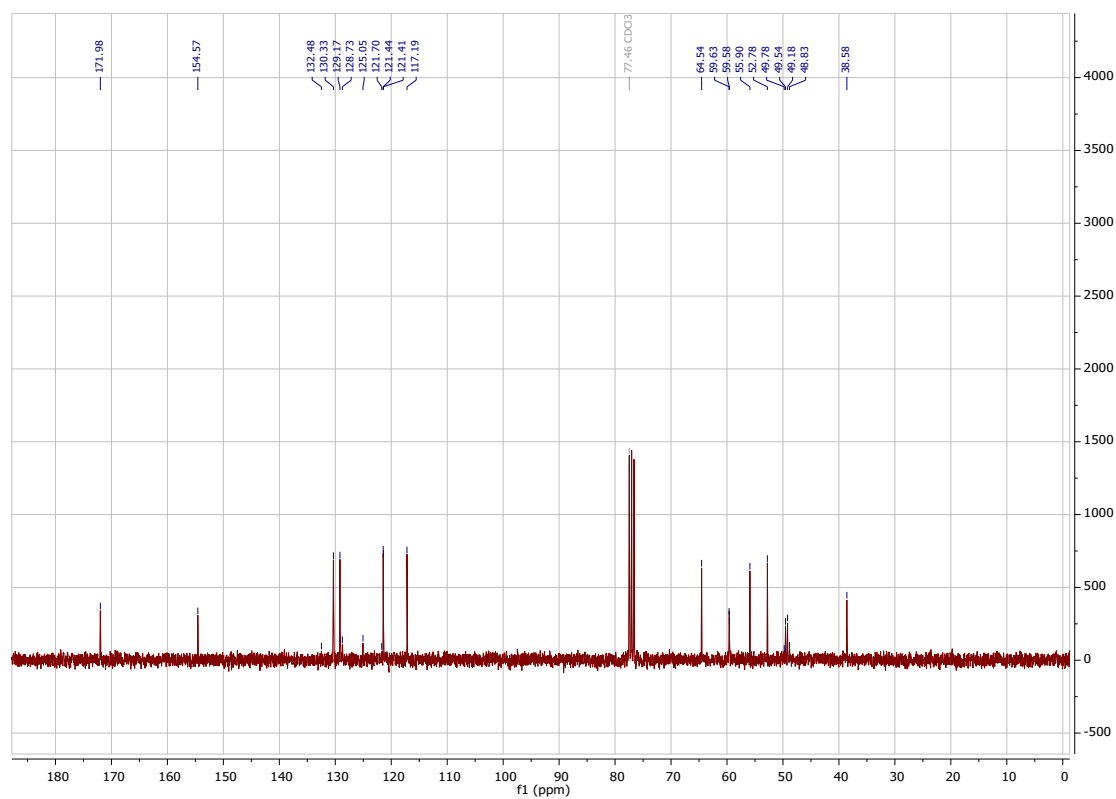

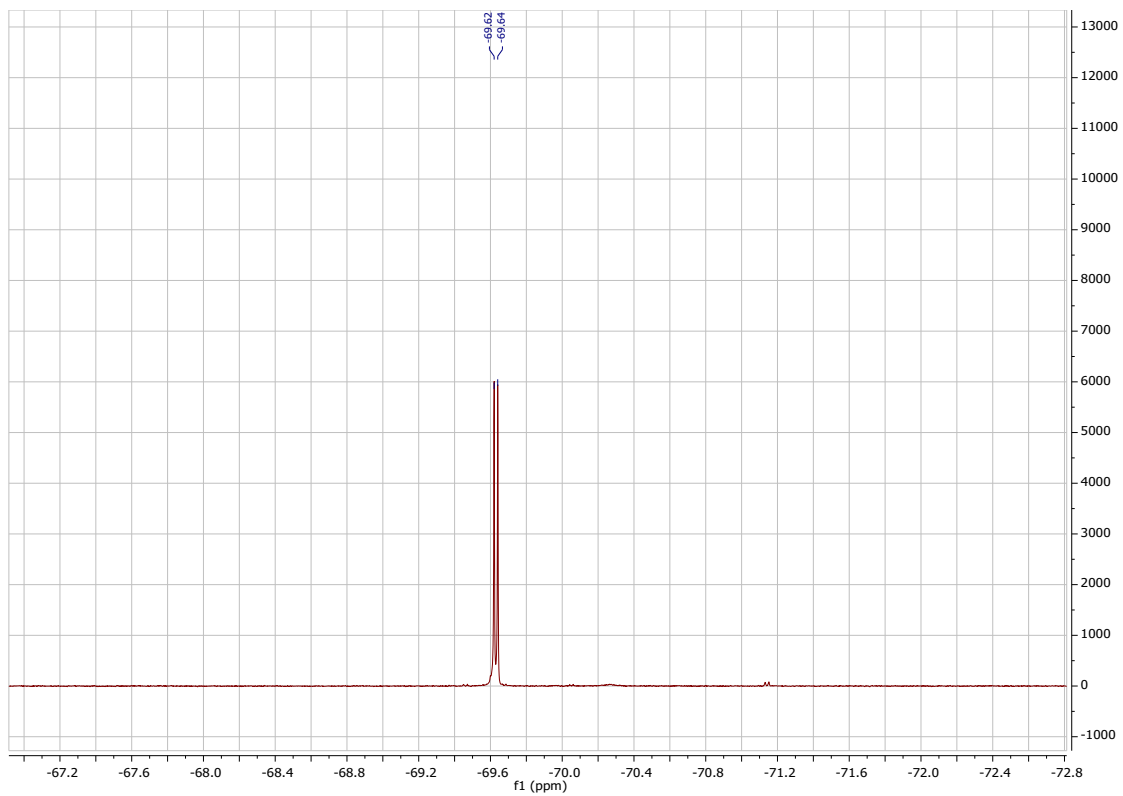

Methyl (2*R*,3*R*,3*aR*,9*bS*)-8-methyl-3-trifluoromethyl-1,2,3,3*a*,4,9*b*-hexahydrochromeno[4,3-*b*]pyrrole-2-carboxylate (**2b**)

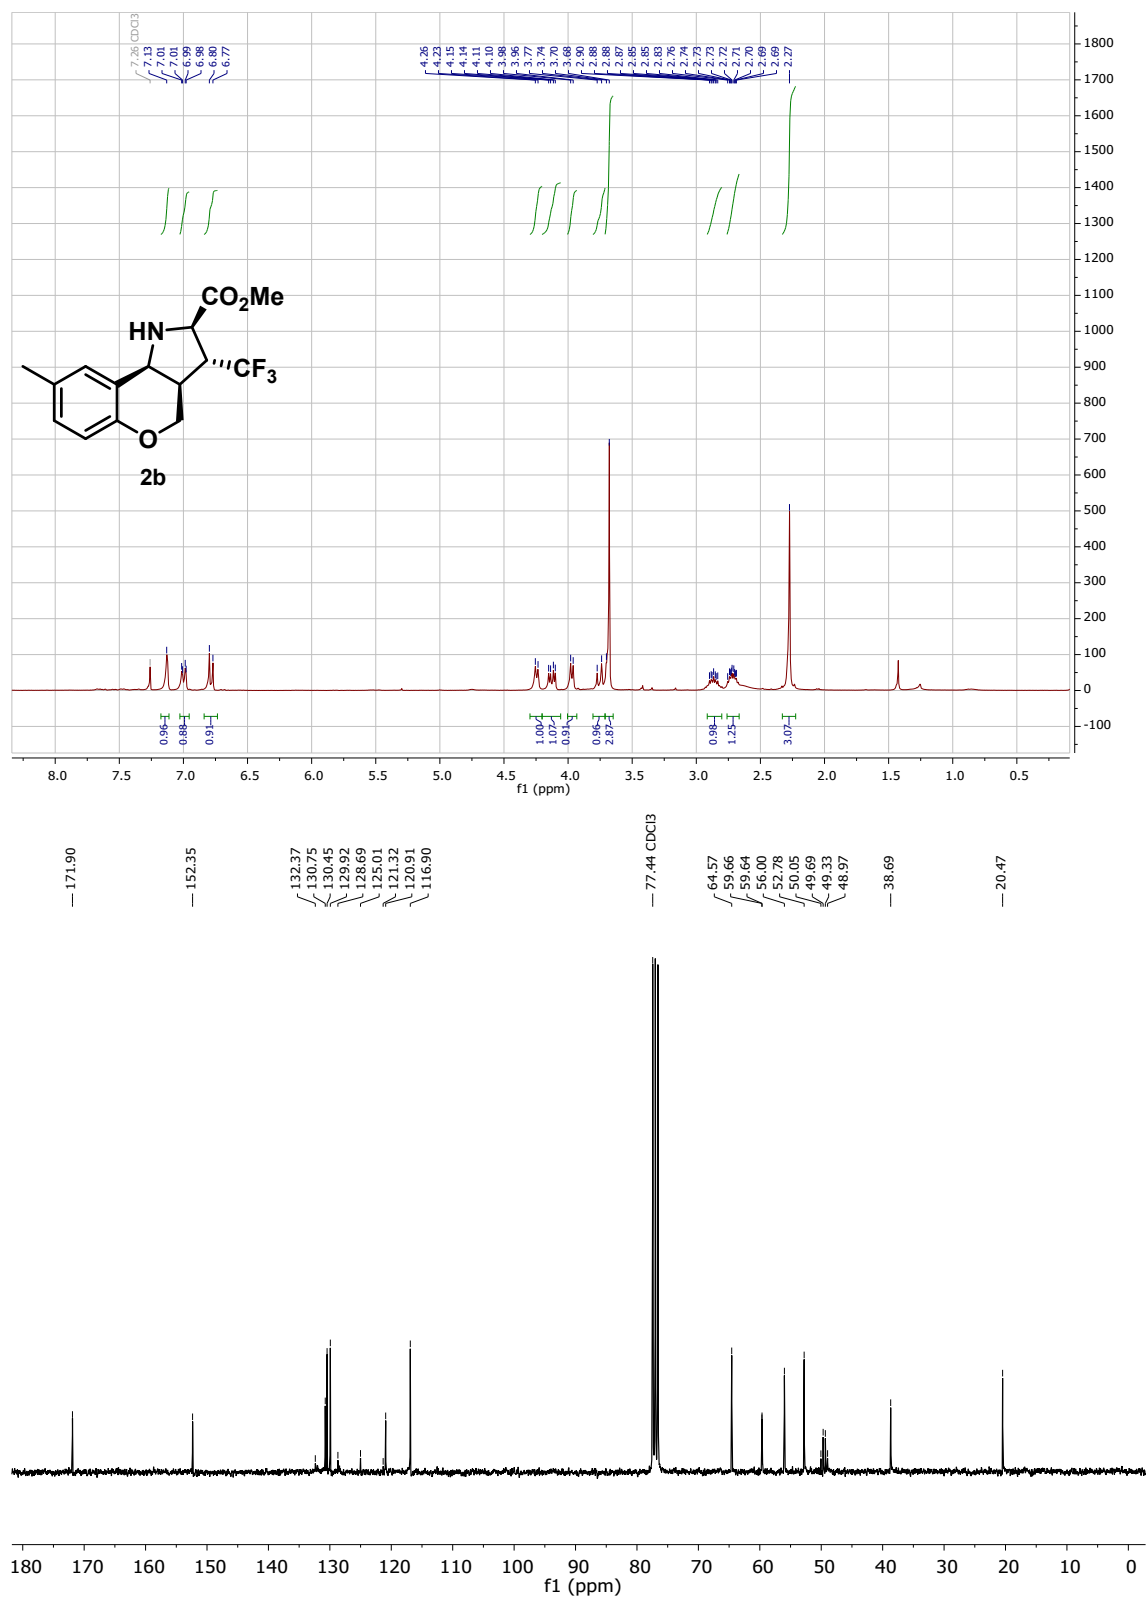

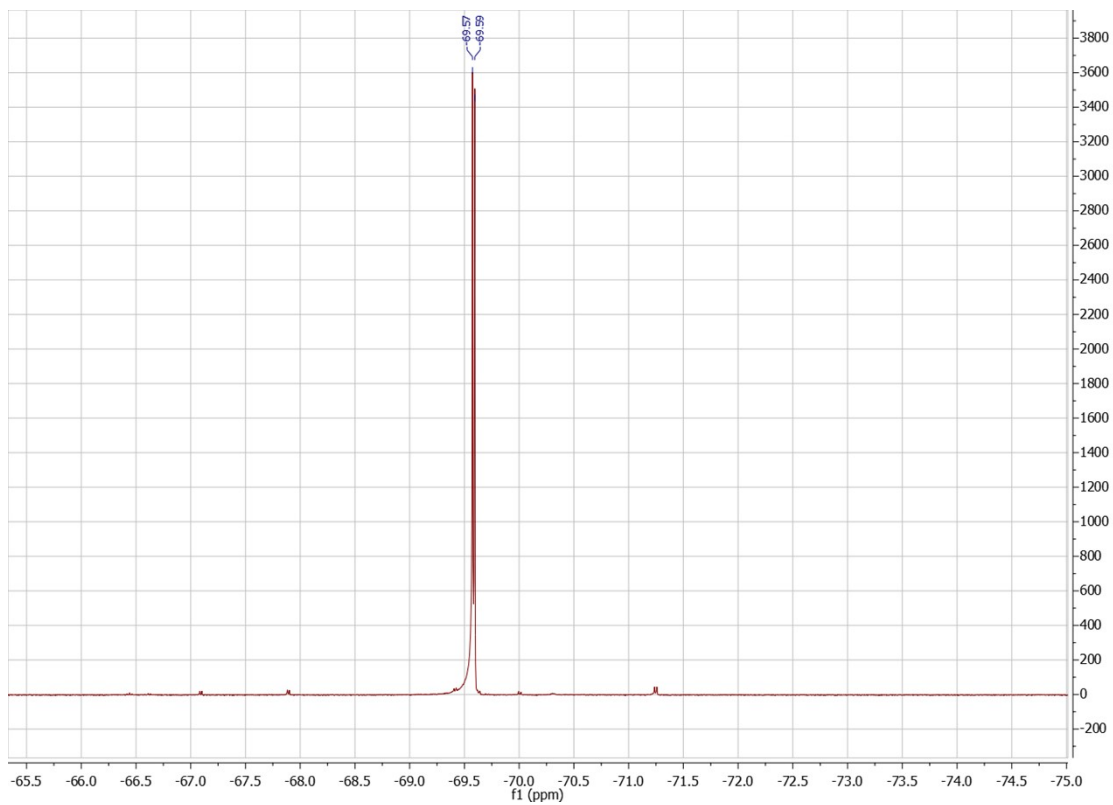

**Methyl (2*R*,3*R*,3*aR*,9*bS*)-8-methoxy-3-trifluoromethyl-1,2,3,3*a*,4,9*b*-hexahydrochromeno[4,3-*b*]pyrrole-2-carboxylate (2c)**

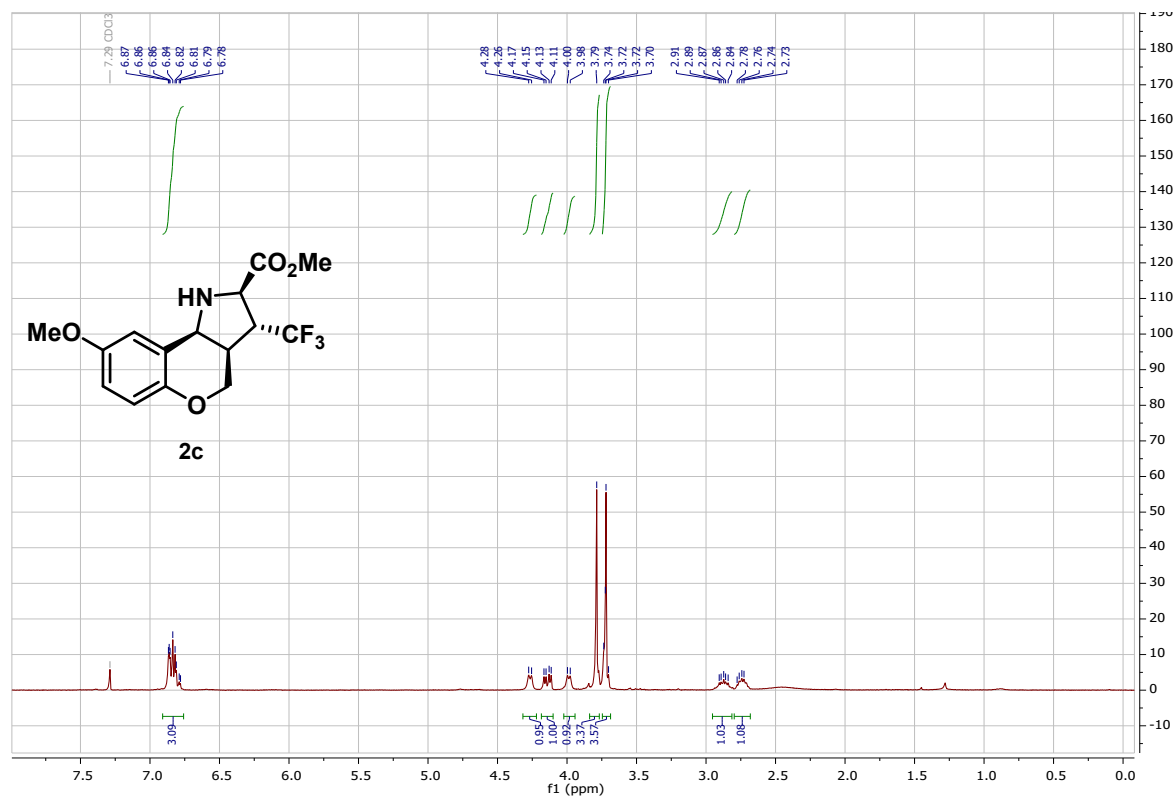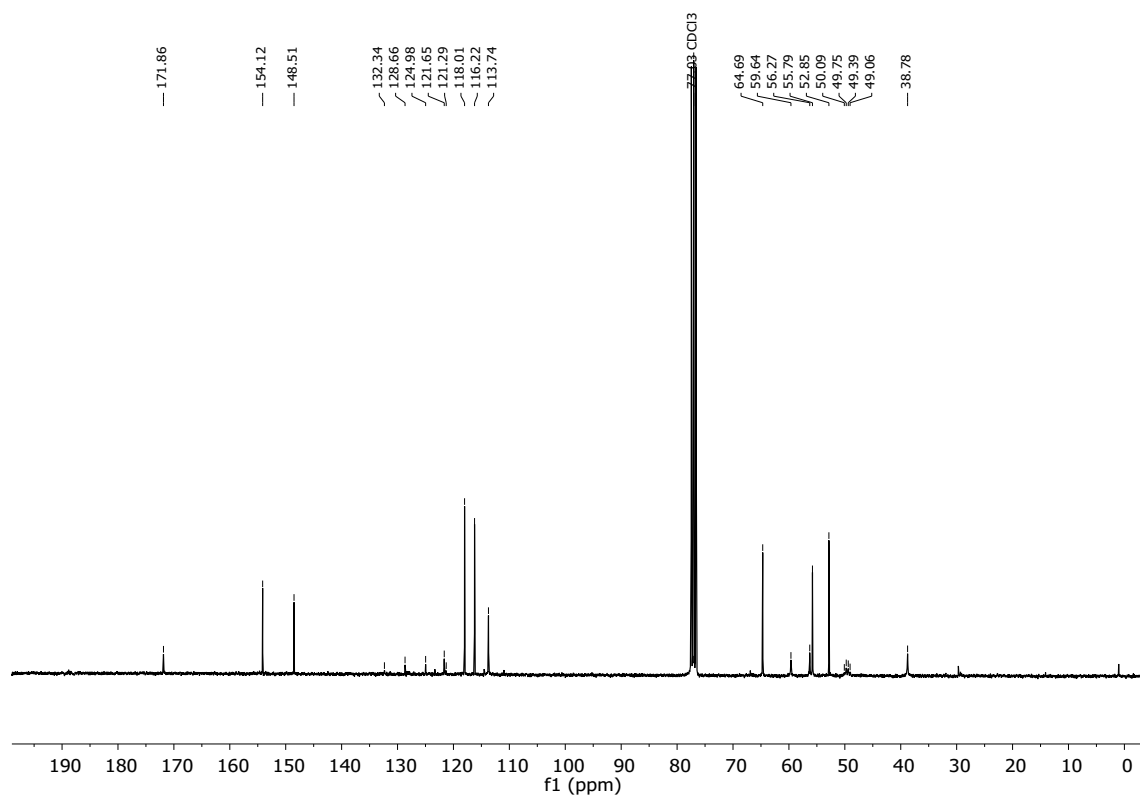

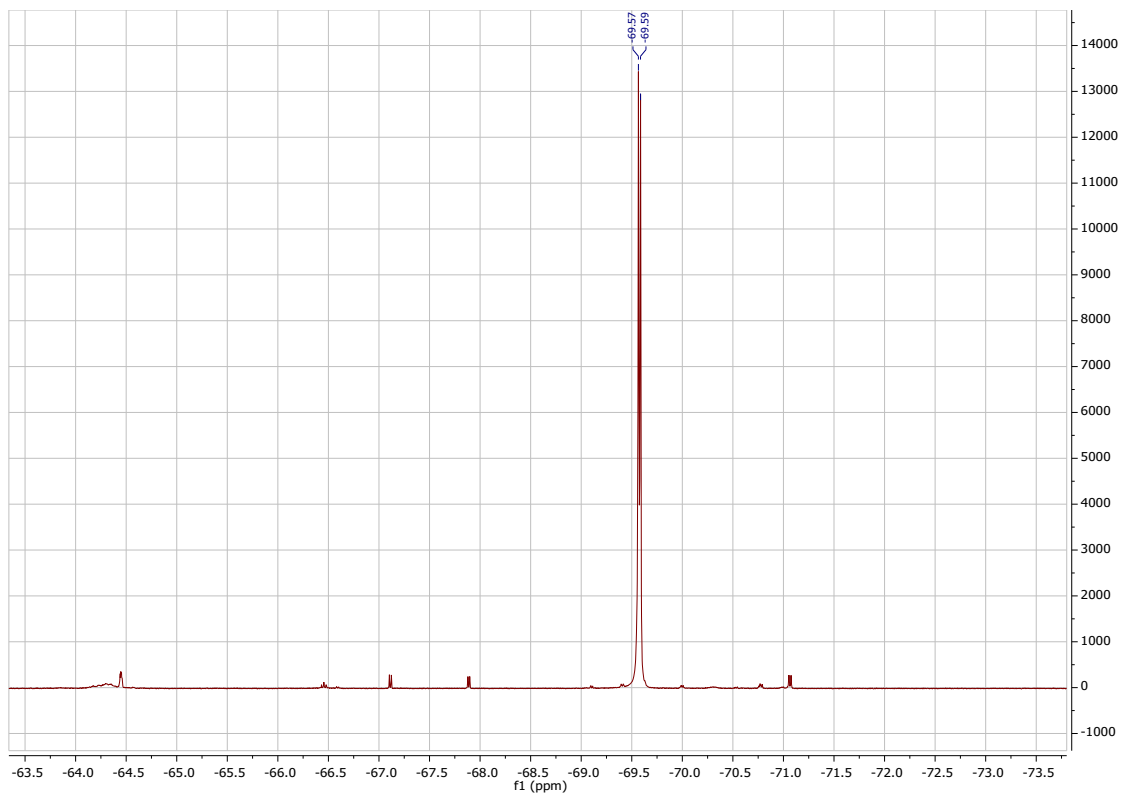

Methyl (2R,3R,3aR,9bS)-7-methoxy-3-trifluoromethyl-1,2,3,3a,4,9b-hexahydrochromeno[4,3-b]pyrrole-2-carboxylate (2d)

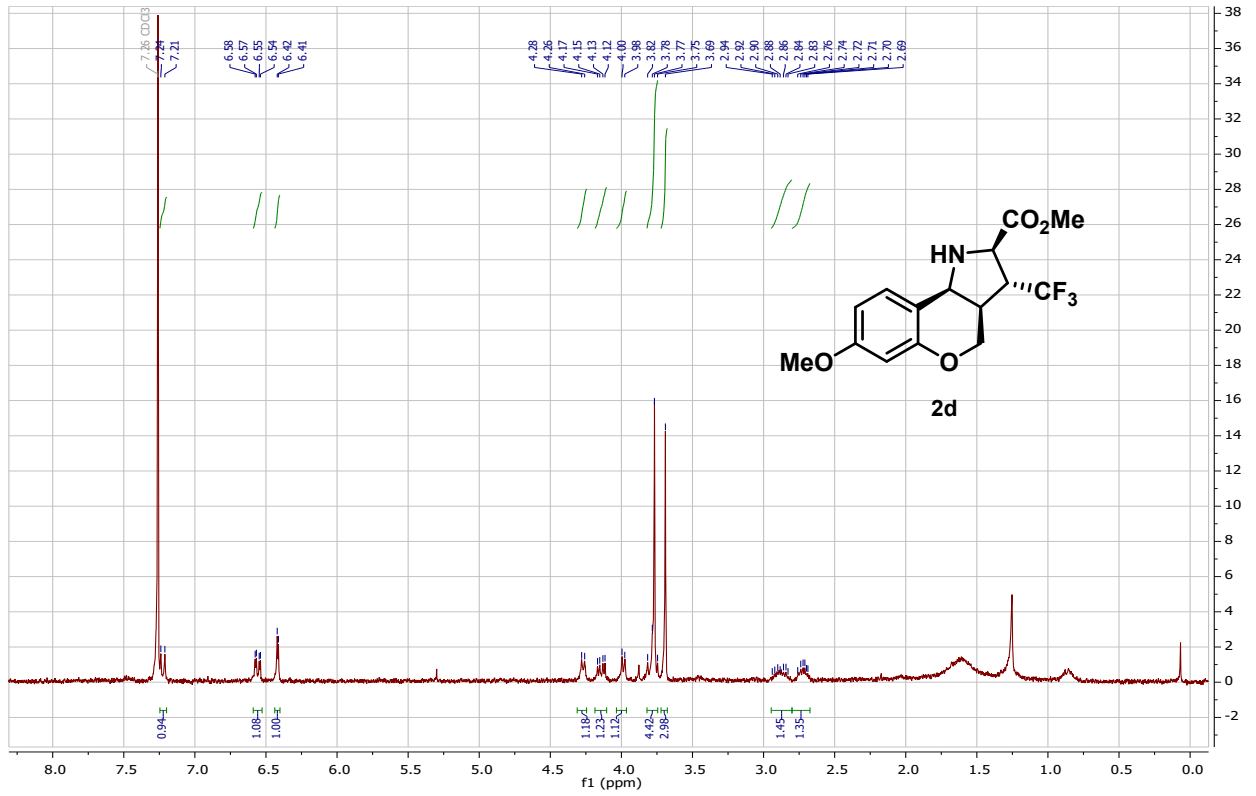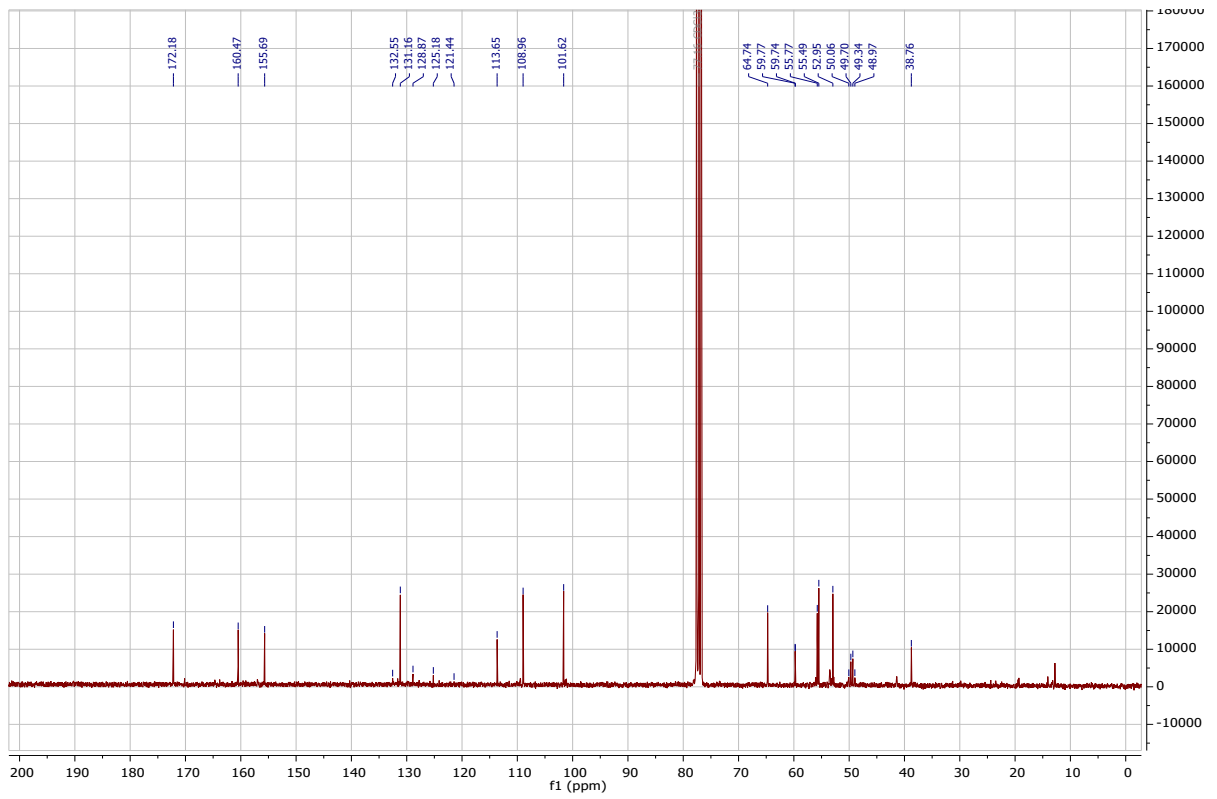



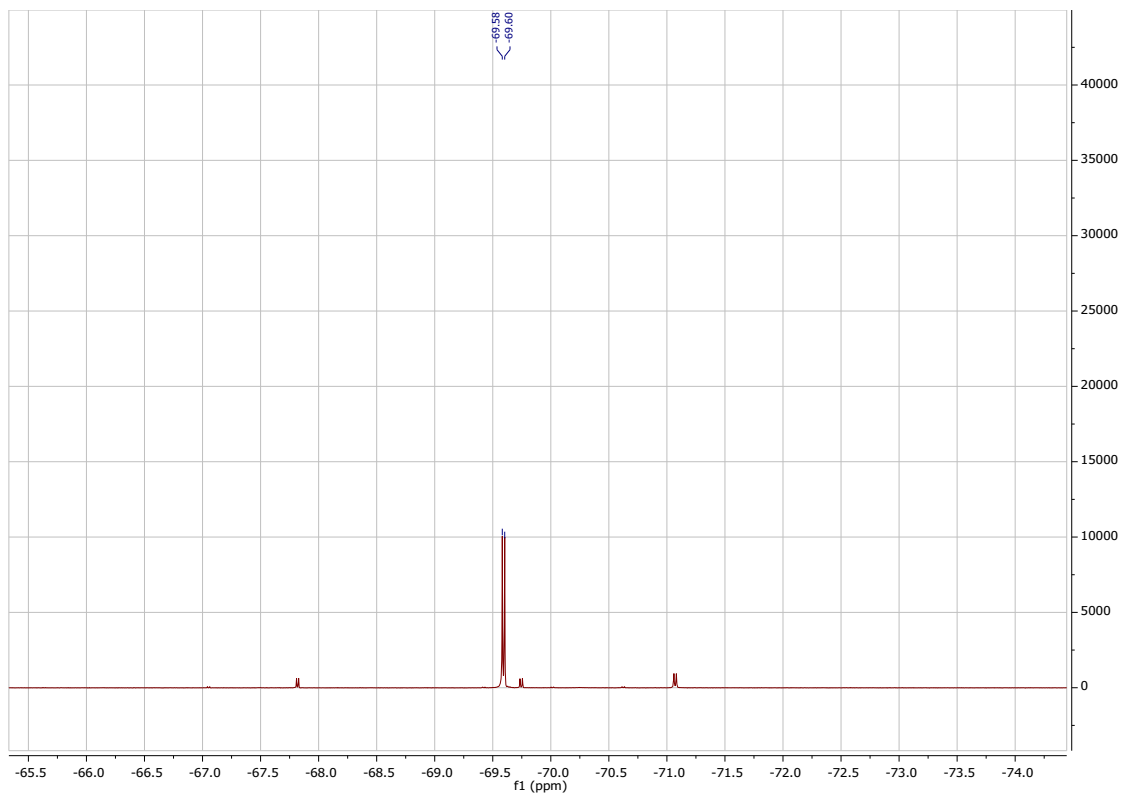

**Methyl (2*R*,3*R*,3*aR*,9*bS*)-6-methoxy-3-trifluoromethyl-1,2,3,3*a*,4,9*b*-hexahydrochromeno[4,3-*b*]pyrrole-2-carboxylate (2e)**

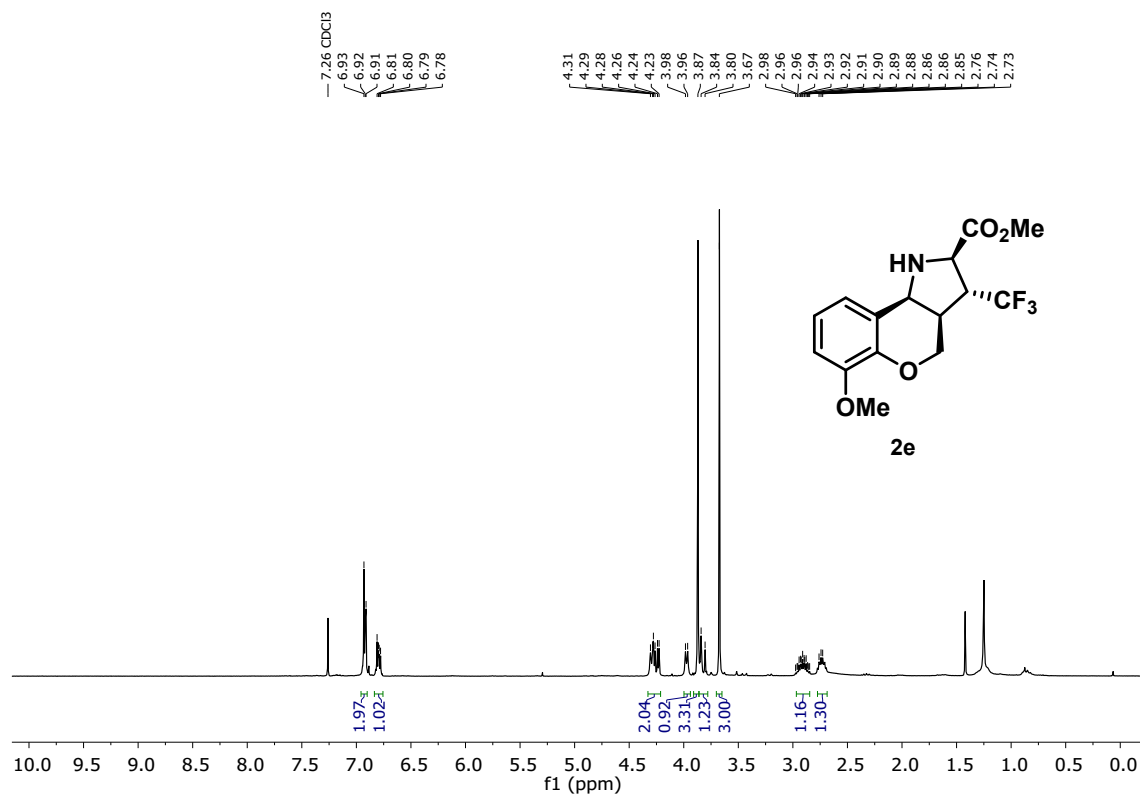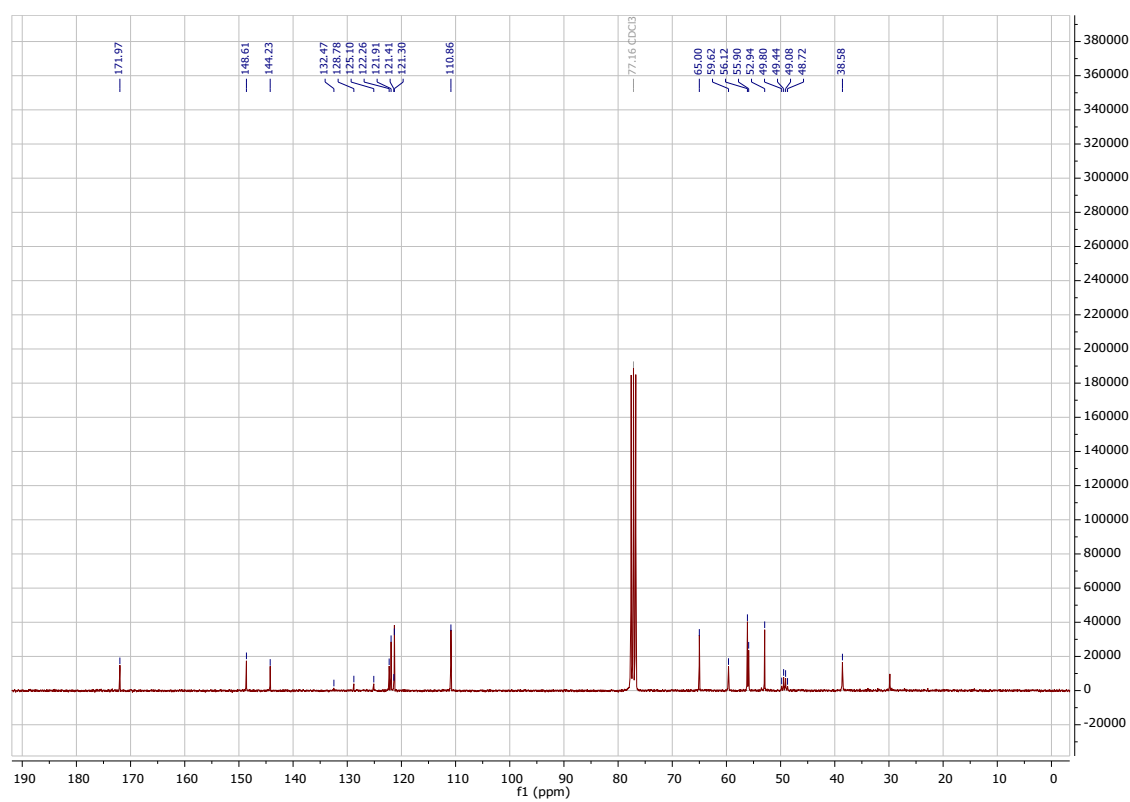

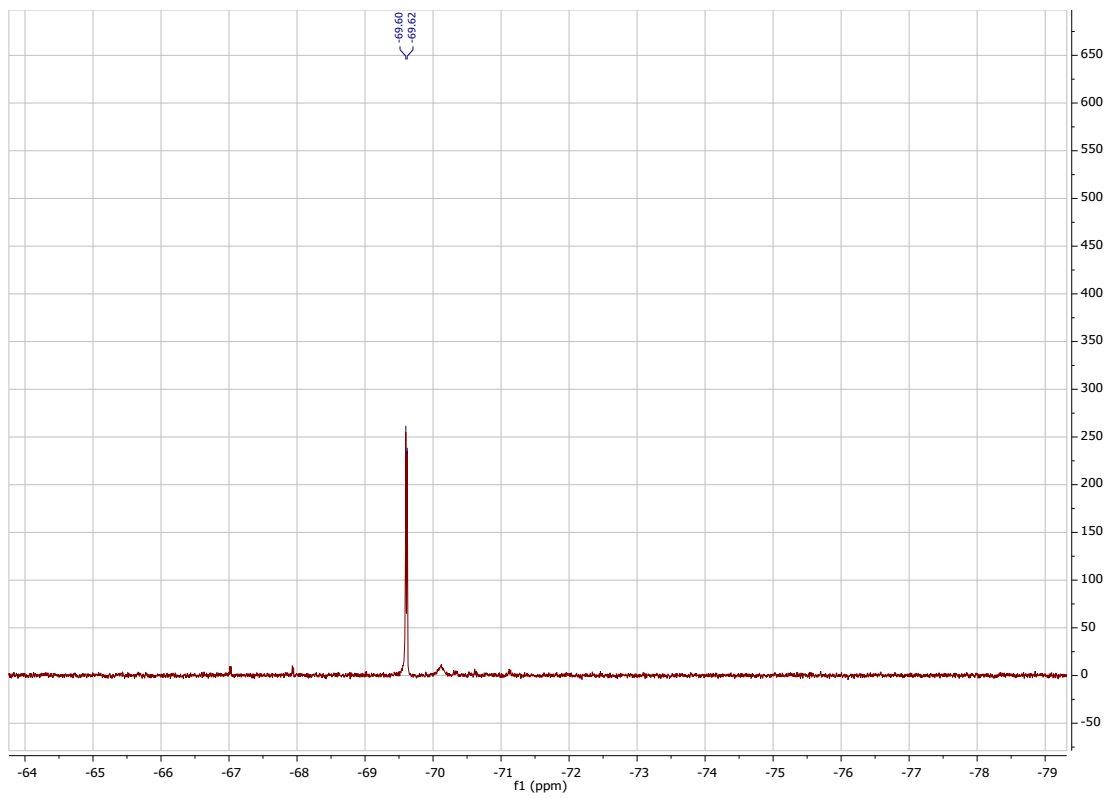

**Methyl (2*R*,3*R*,3*aR*,9*bS*)-8-chloro-3-trifluoromethyl-1,2,3,3*a*,4,9*b*-hexahydrochromeno[4,3-*b*]pyrrole-2-carboxylate (2f)**

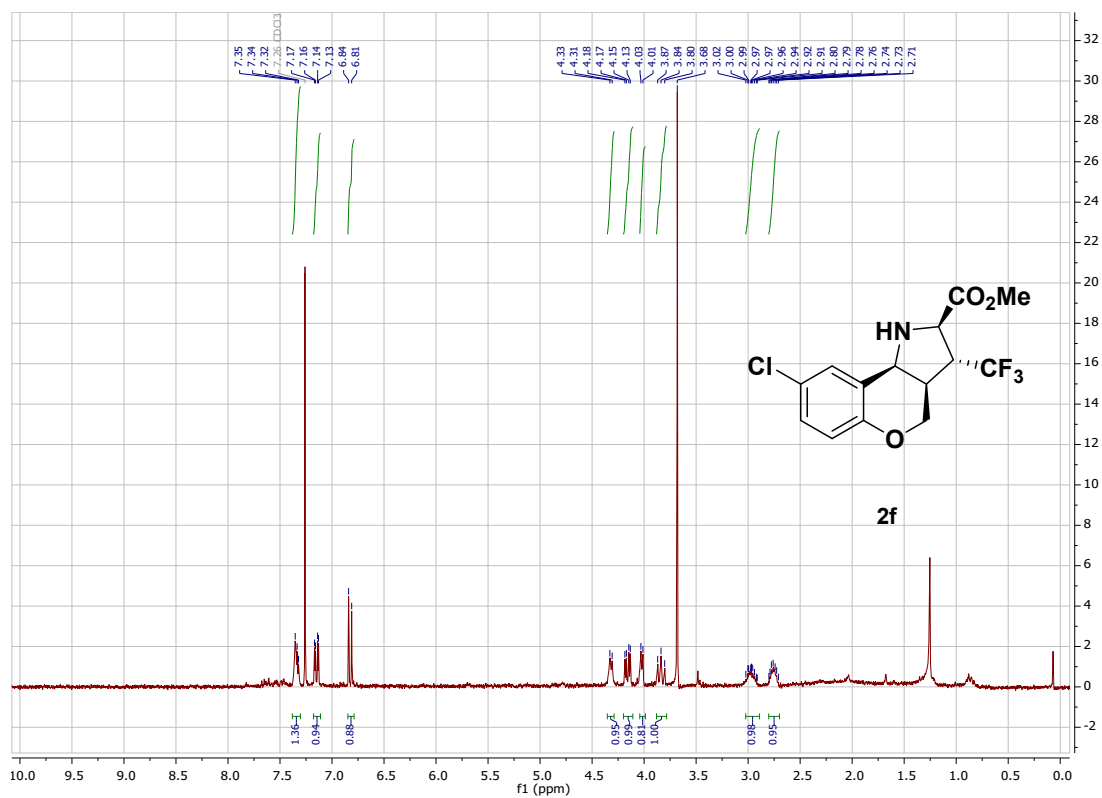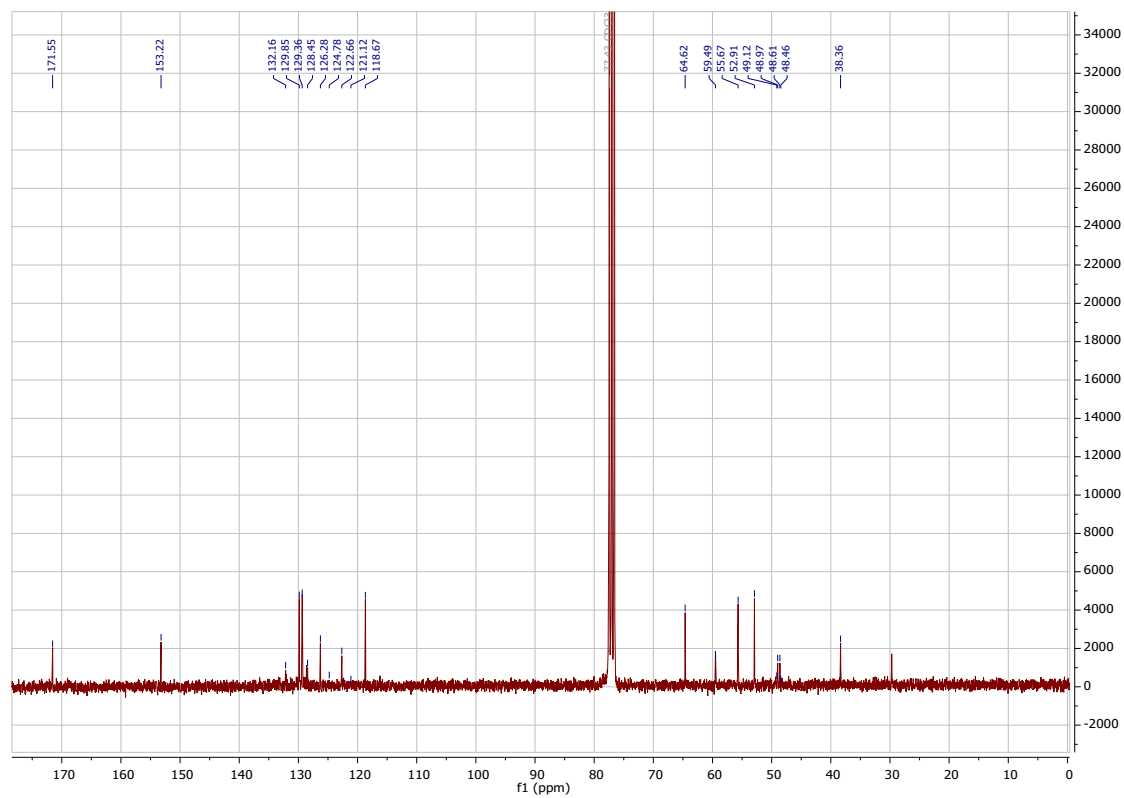

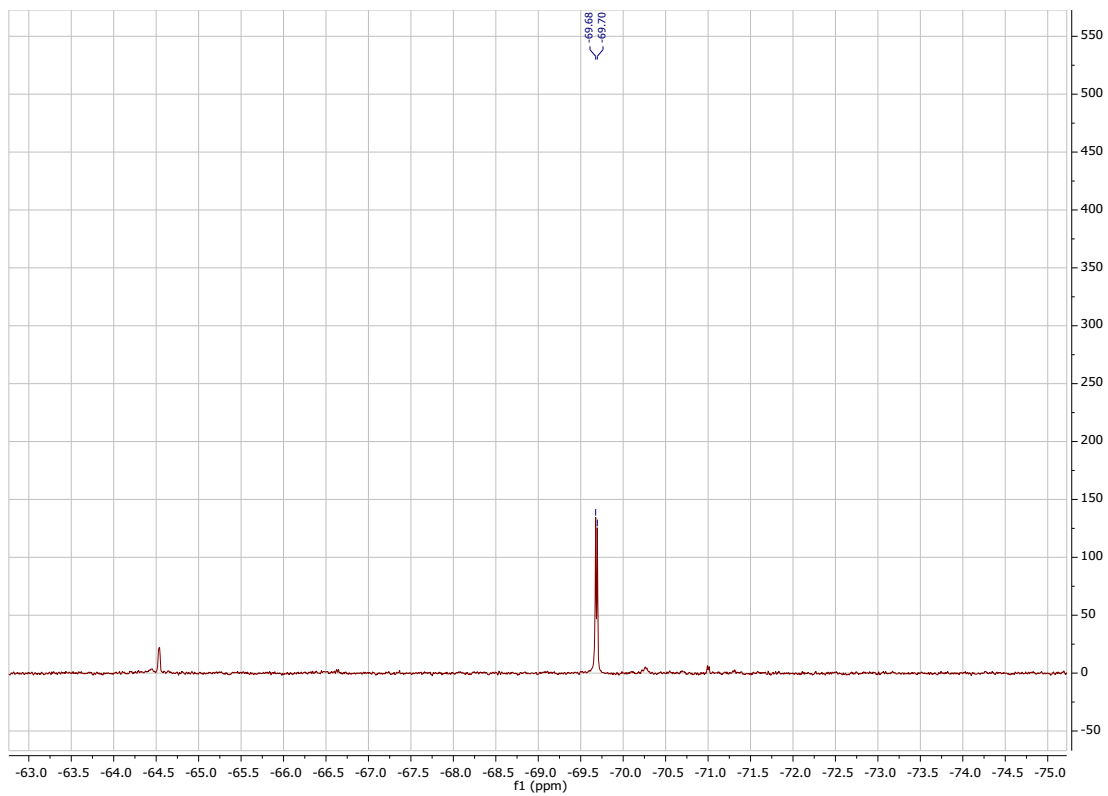

**Methyl (2R,3R,3aR,9bS)-6,8-dichloro-3-(trifluoromethyl)-1,2,3,3a,4,9b-hexahydrochromeno[4,3-b]pyrrole-2-carboxylate (2g)**

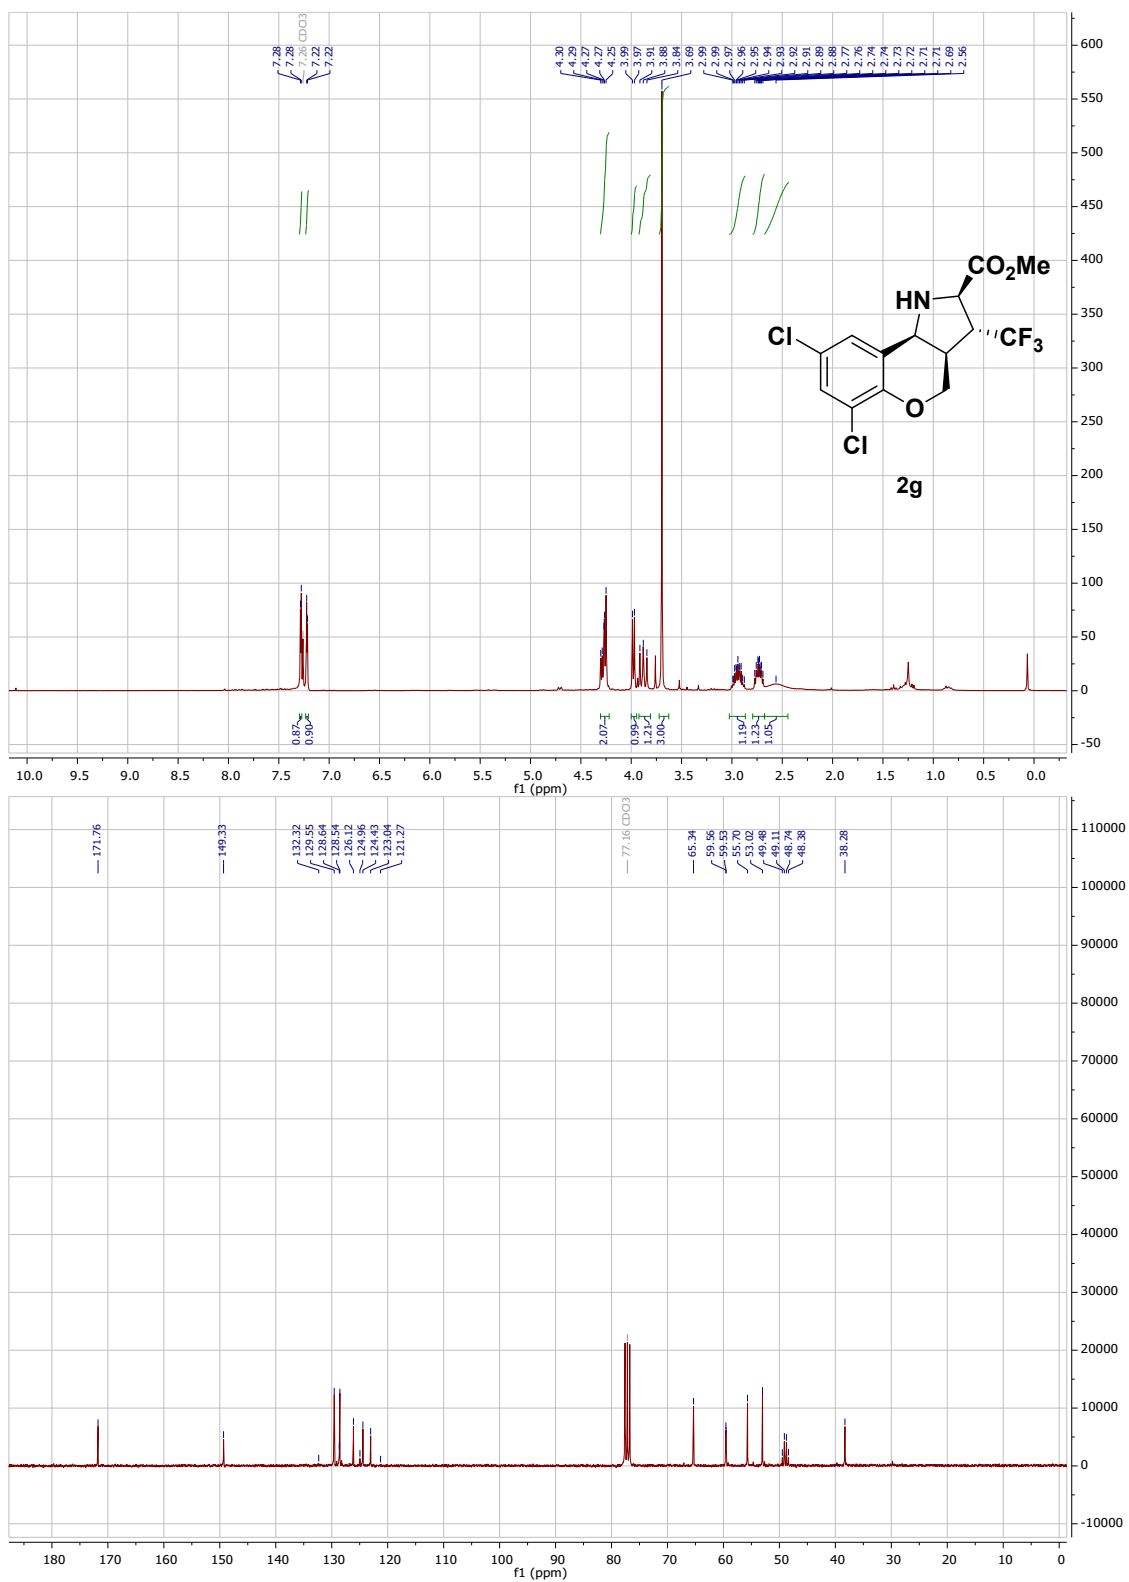

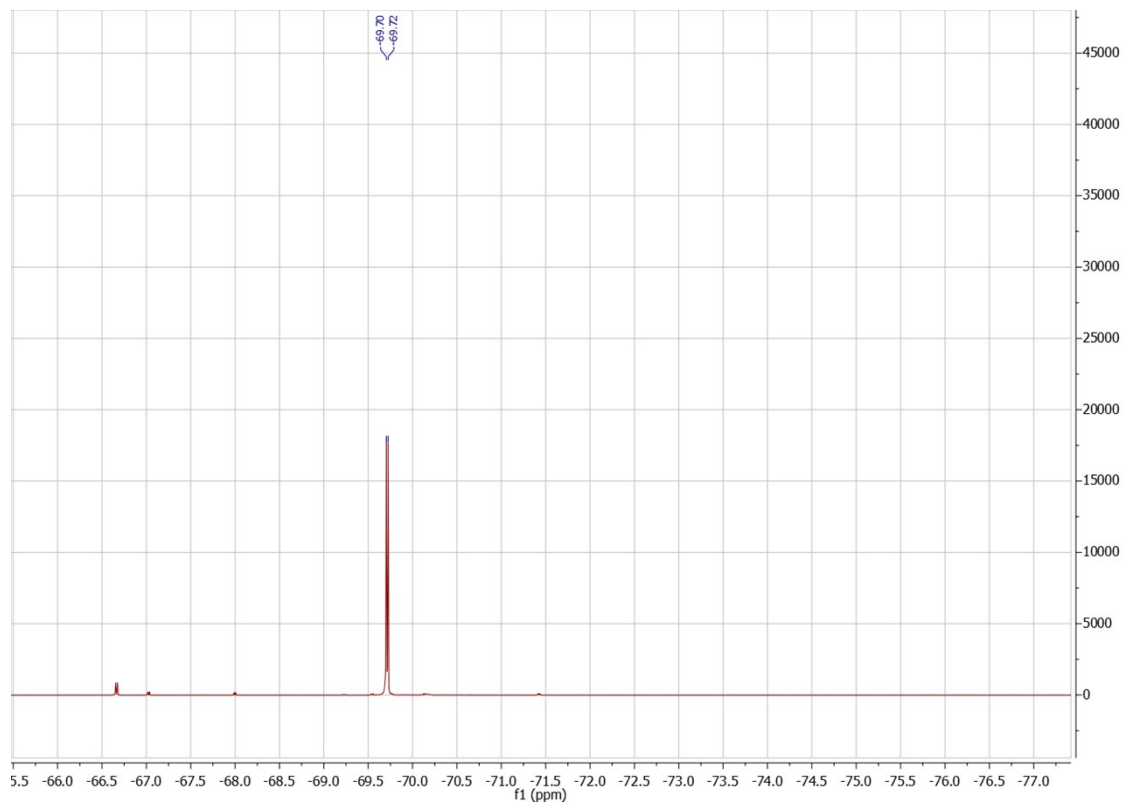

**Methyl (2*R*,3*R*,3*aR*,9*bS*)-7-bromo-3-trifluoromethyl-1,2,3,3*a*,4,9*b*-hexahydrochromeno[4,3-*b*]pyrrole-2-carboxylate (2h)**

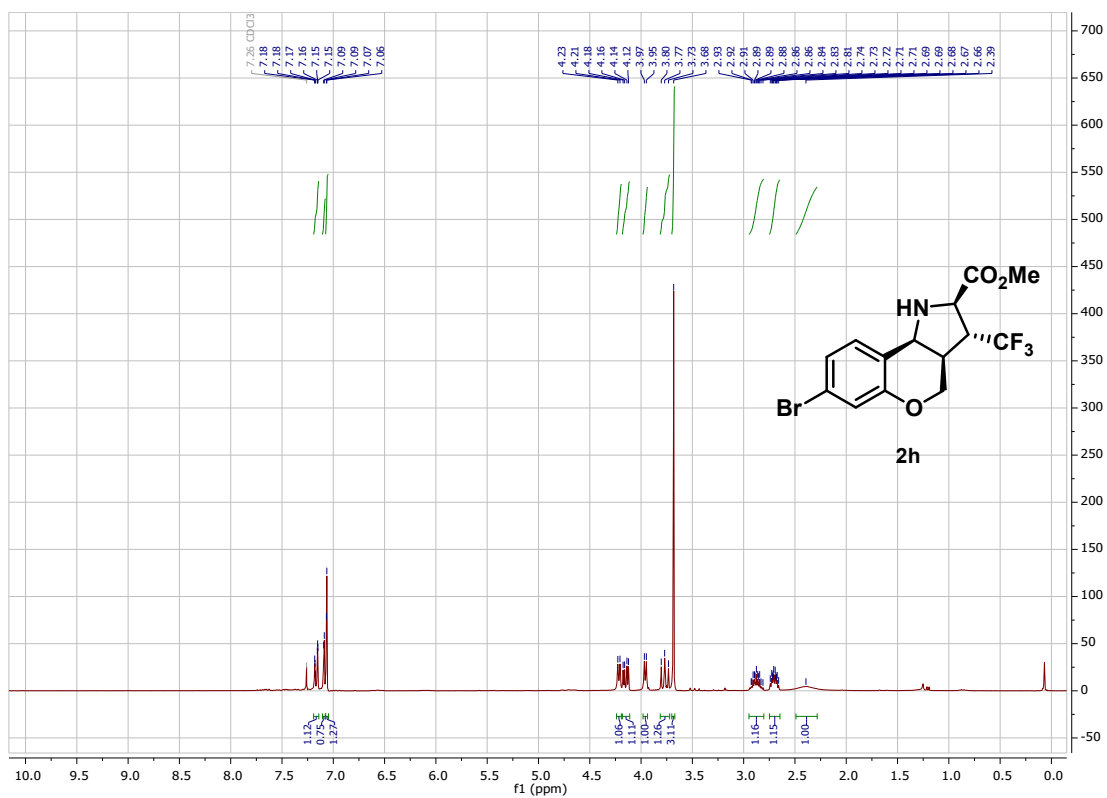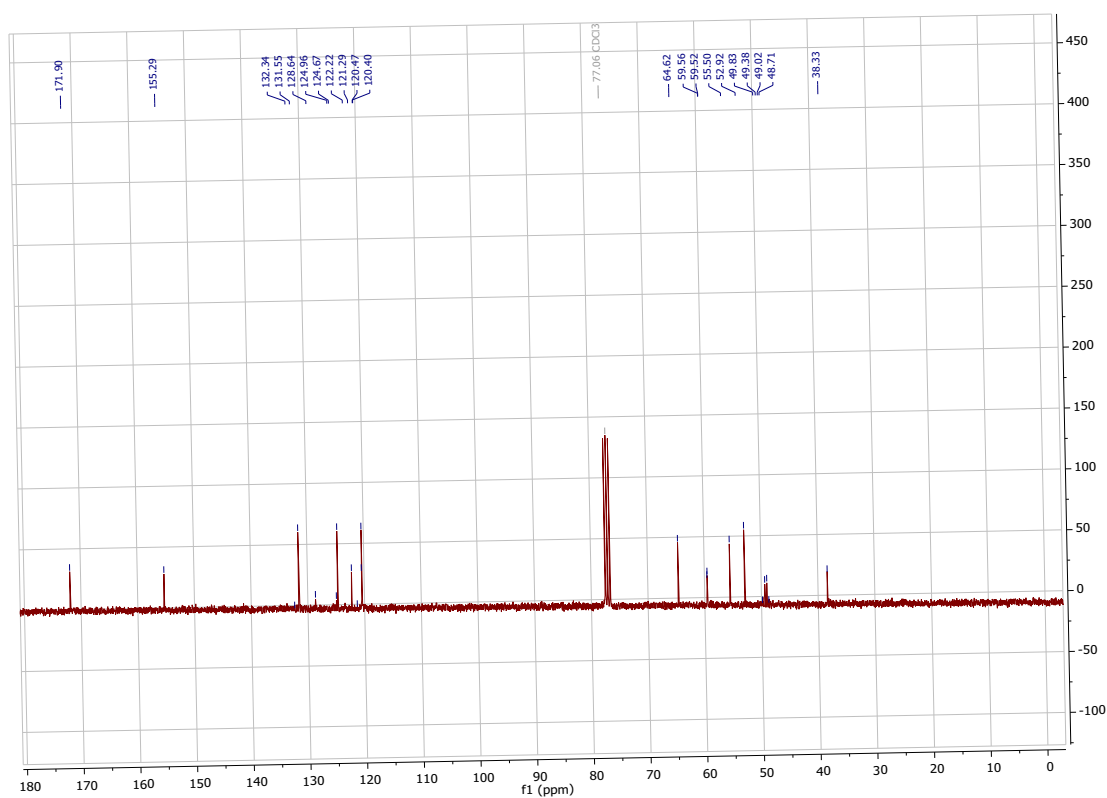



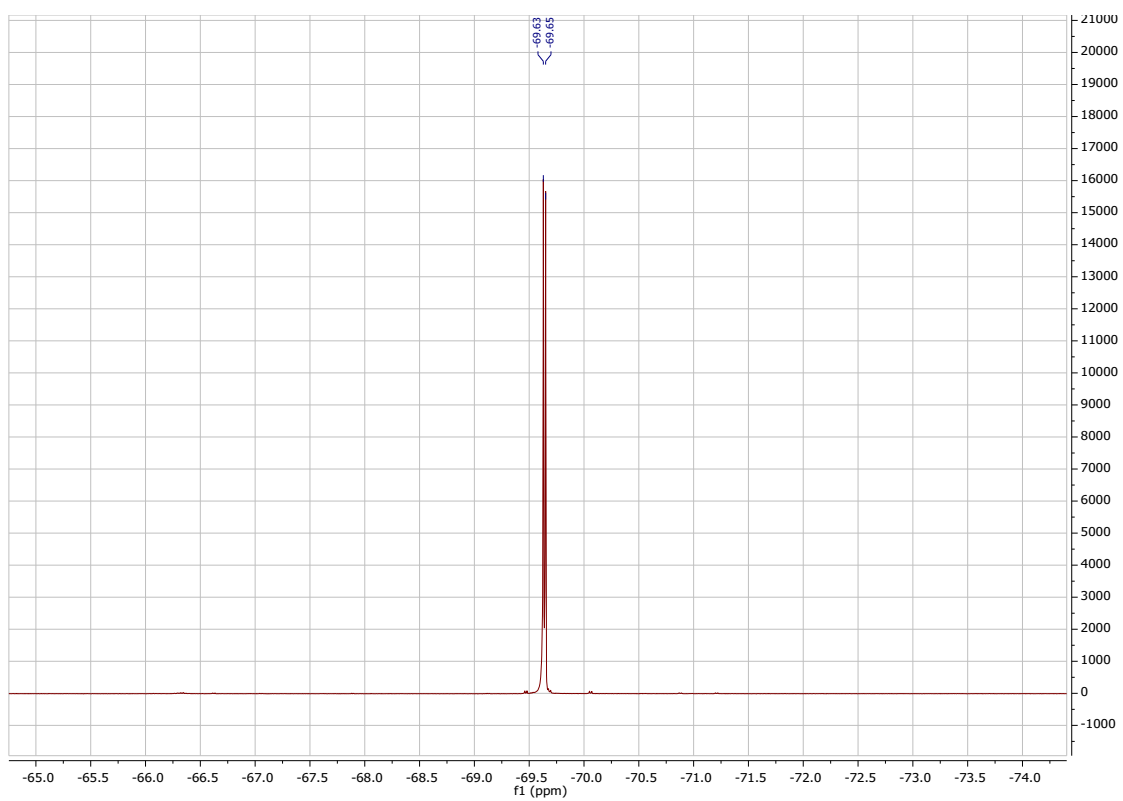

Methyl

(2R,3R,3aR,8bS)-3-trifluoromethyl-1,2,3,3a,4,8b-hexahydrothieno[3',2':5,6]pyrano[4,3-b]pyrrolo-2-carboxylate (2i)

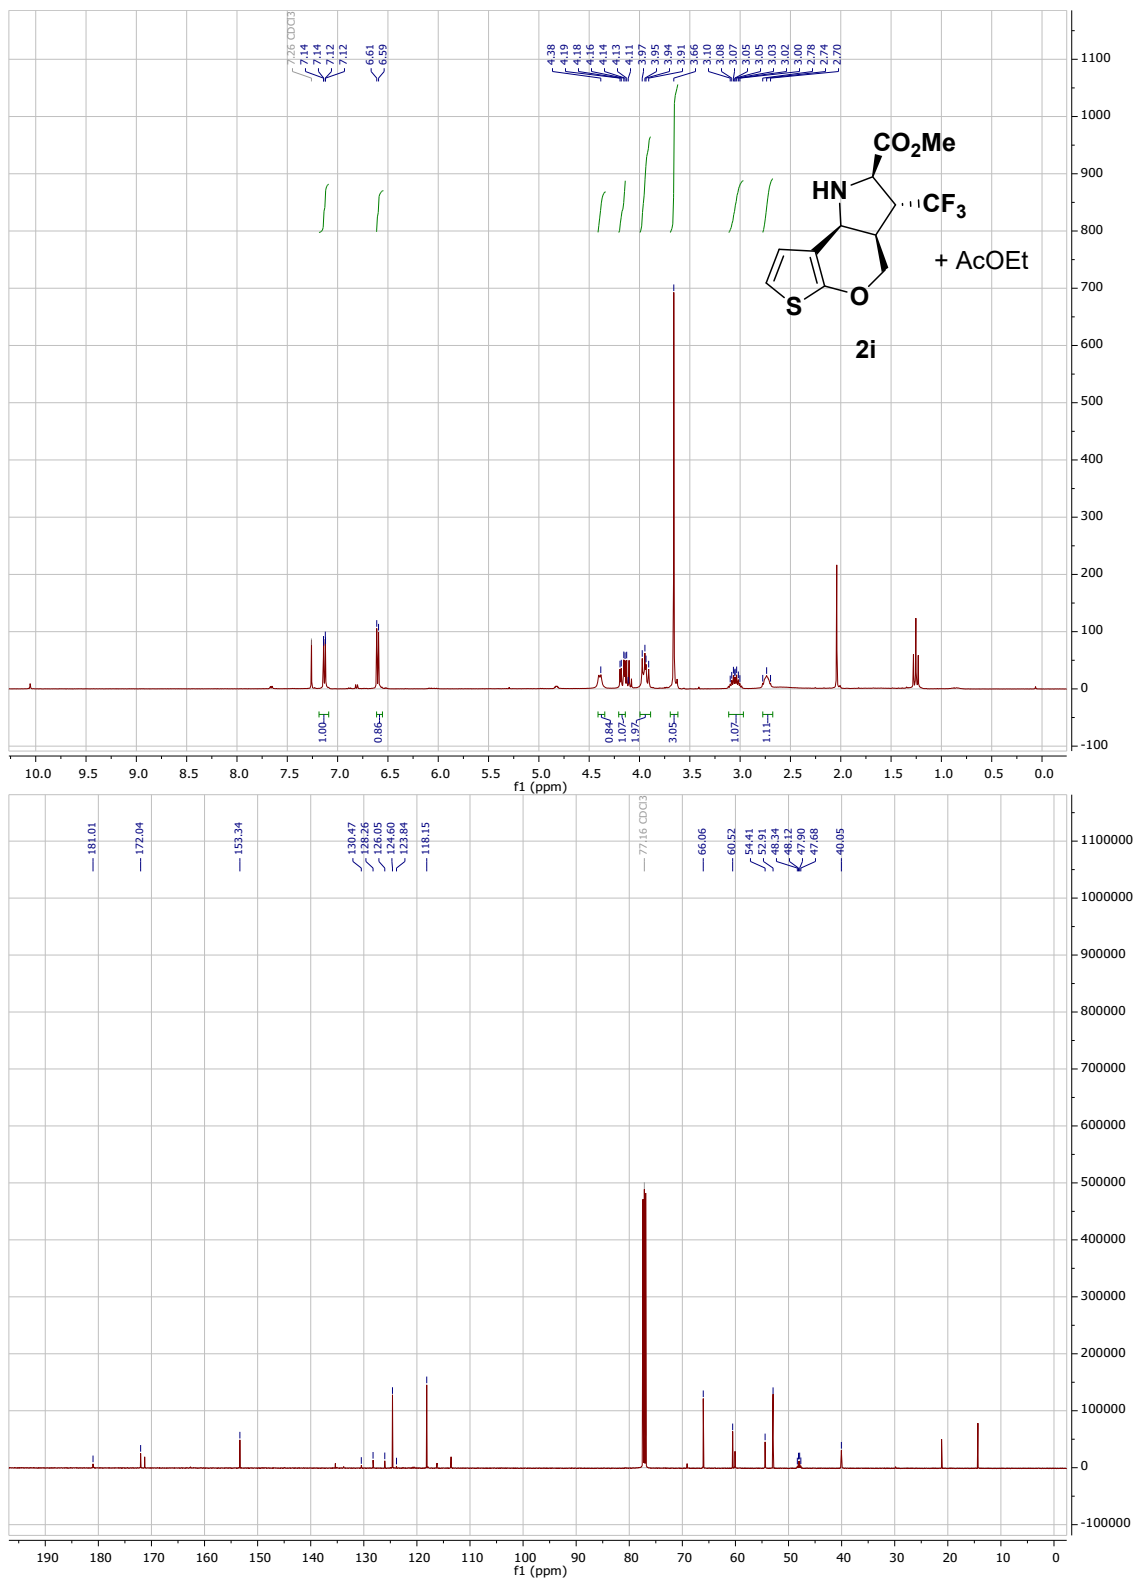

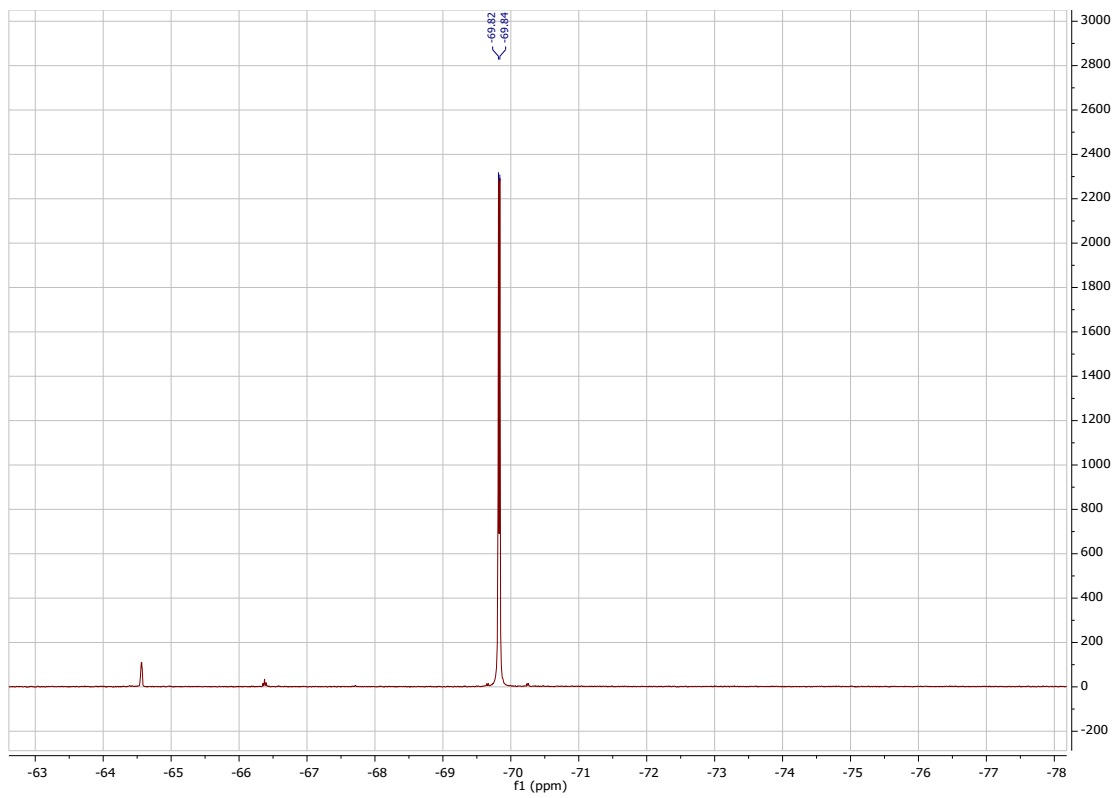

**Methyl (2*S*,3*R*,3*aS*,9*bR*)-5-tosyl-3-trifluoromethyl-2,3,3*a*,4,5,9*b*-hexahydro-1*H*-pyrrolo[3,2-*c*]quinoline-2-carboxylate (7a)**

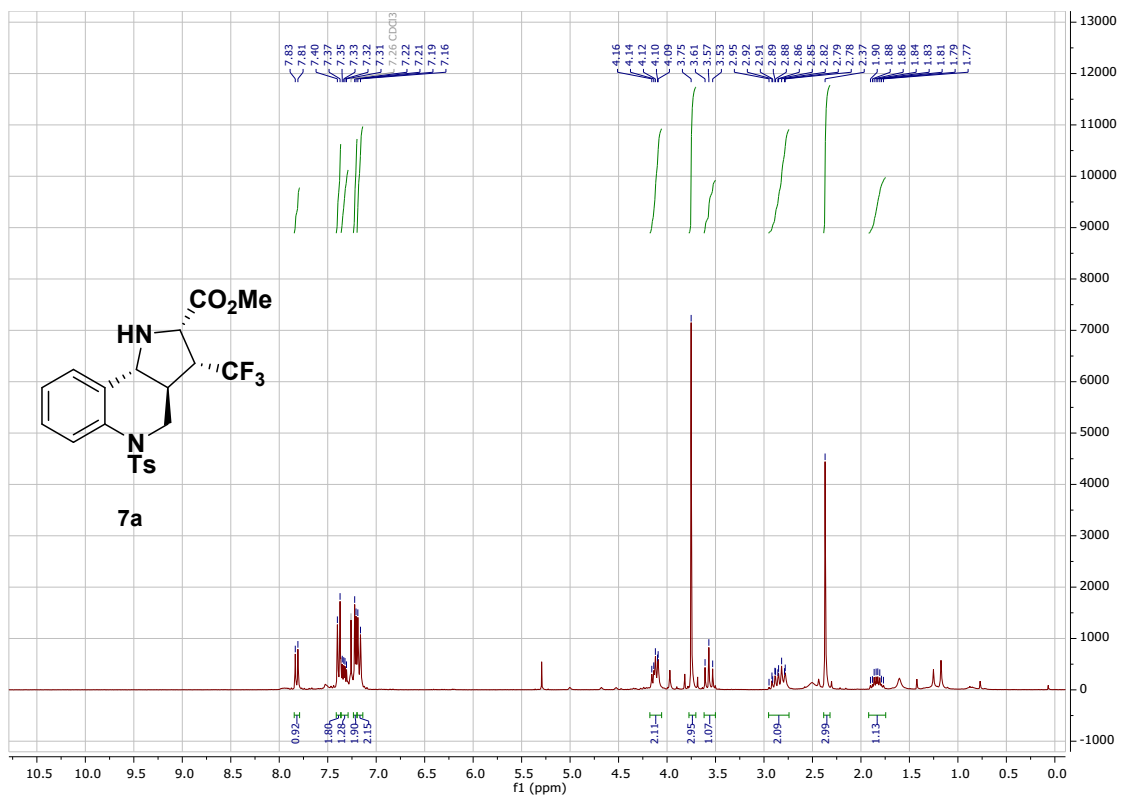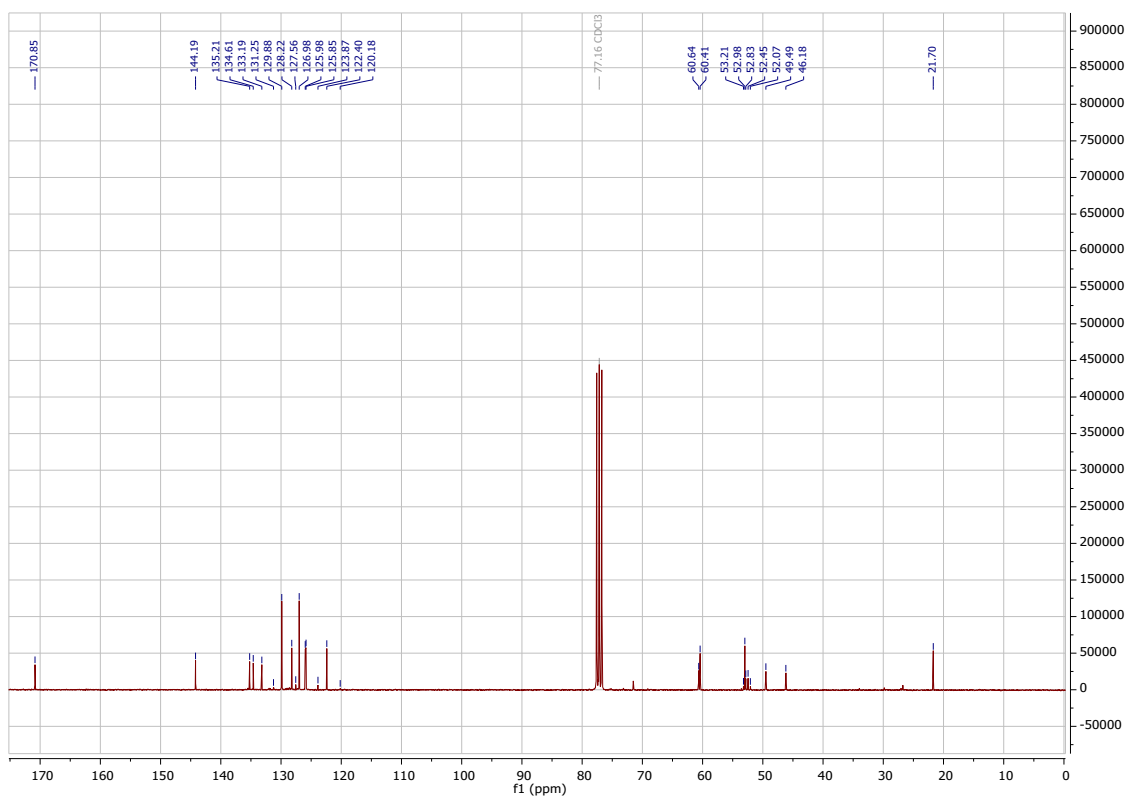

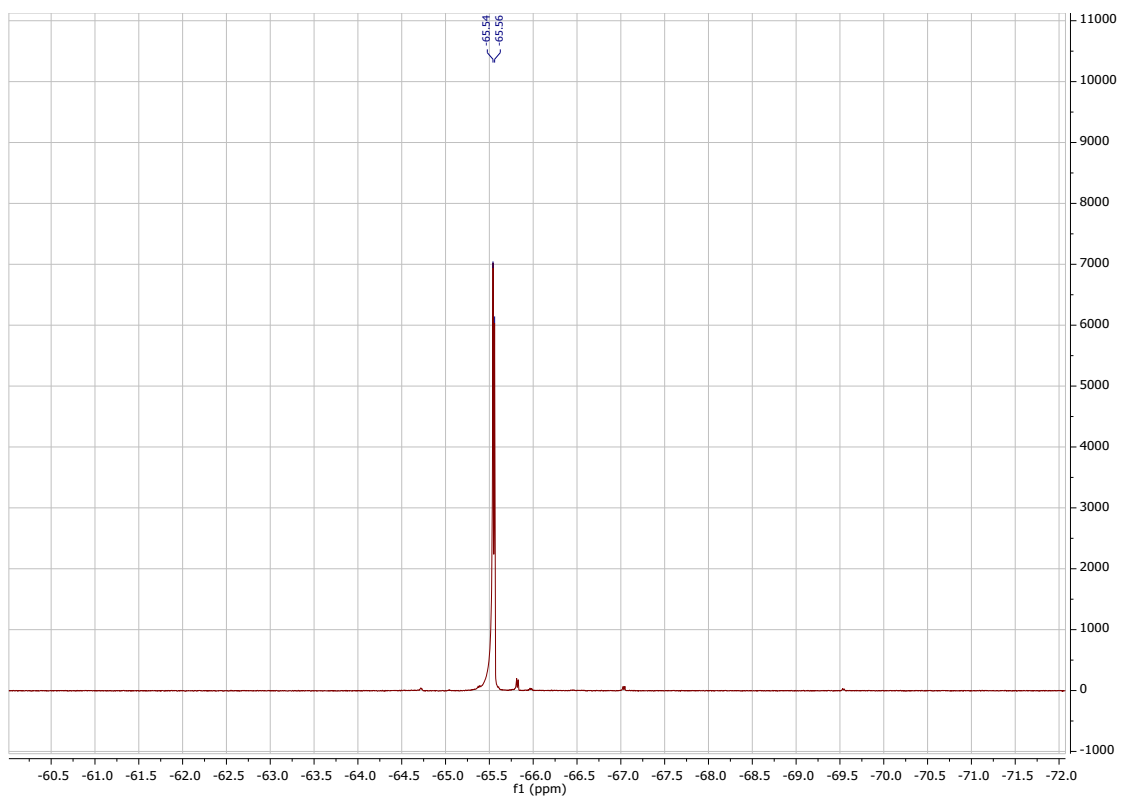

**Methyl (2S,3R,3aS,9bR)-8-methyl-5-tosyl-3-trifluoromethyl-2,3,3a,4,5,9b-hexahydro-1H-pyrrolo[3,2-c]quinoline-2-carboxylate (7b)**

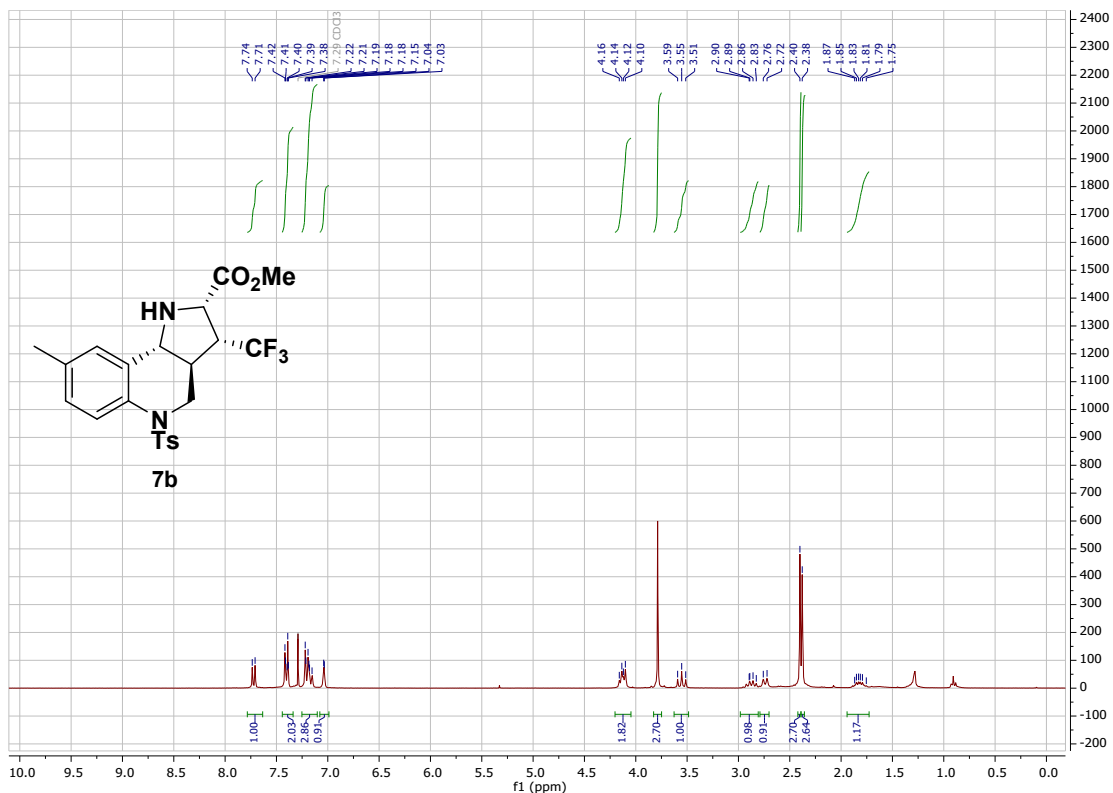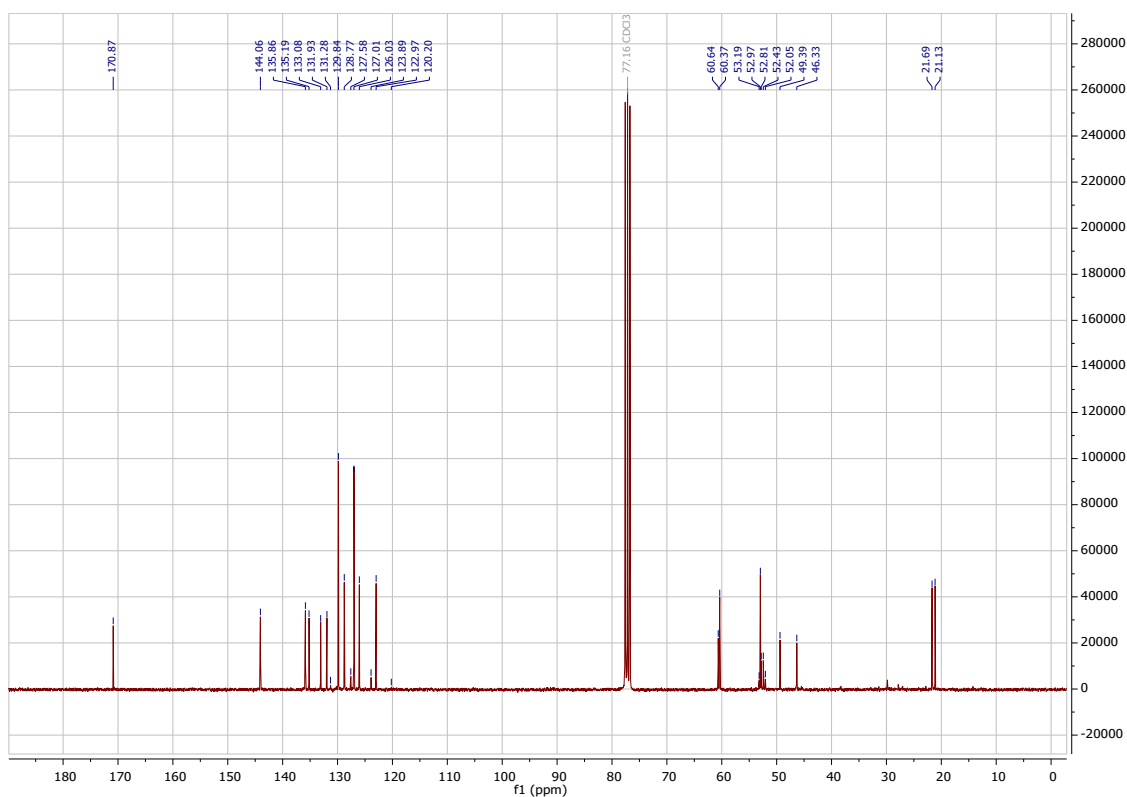

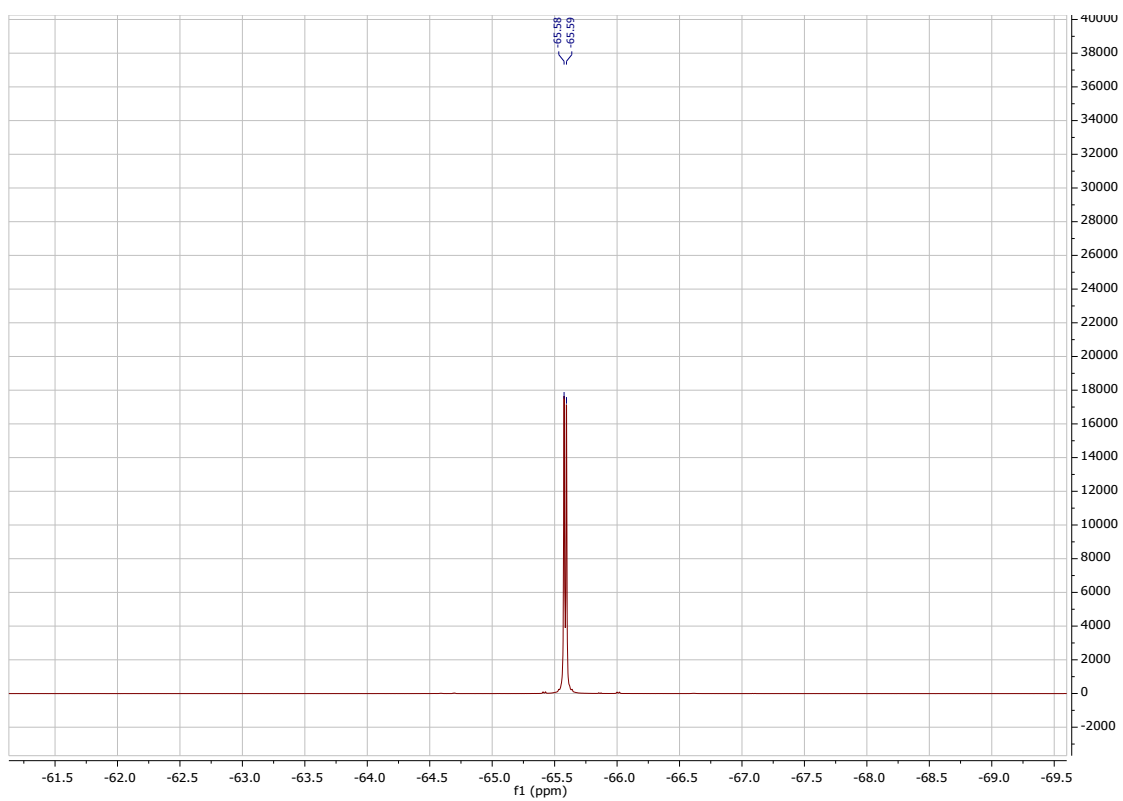

**Methyl (2*S*,3*R*,3*aS*,9*bR*)-8-methoxy-5-tosyl-3-trifluoromethyl-2,3,3*a*,4,5,9*b*-hexahydro-1*H*-pyrrolo[3,2-*c*]quinoline-2-carboxylate (7c)**

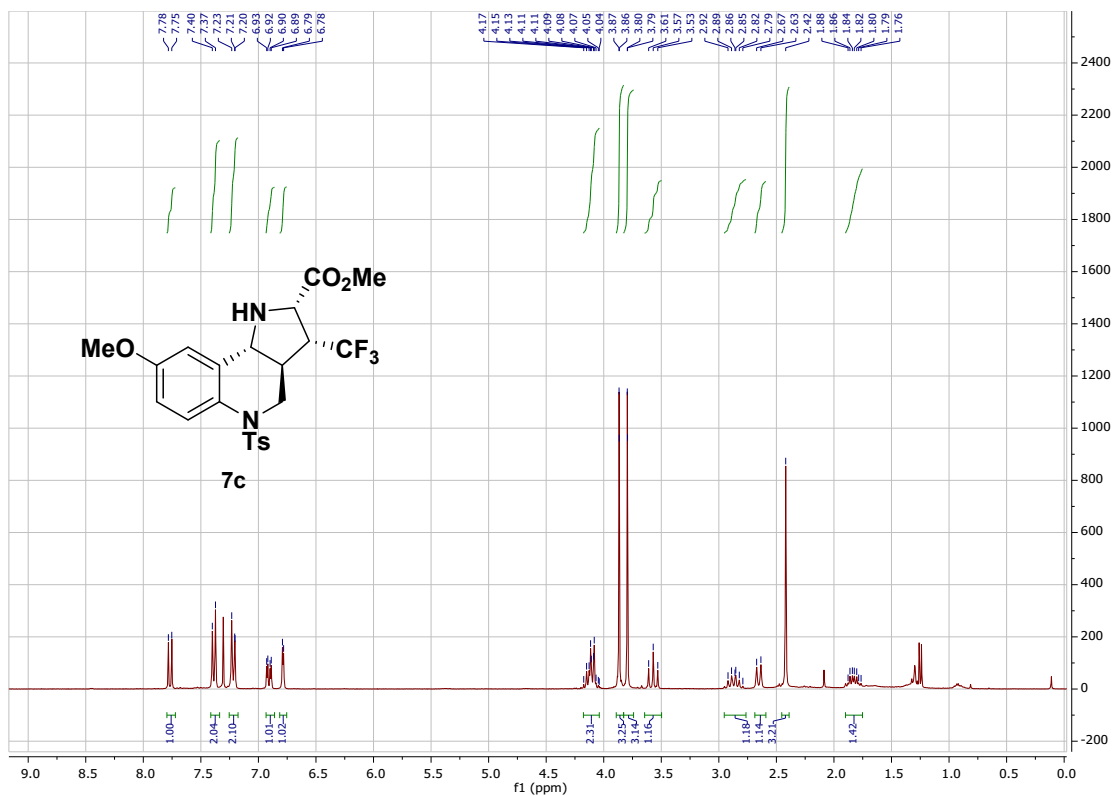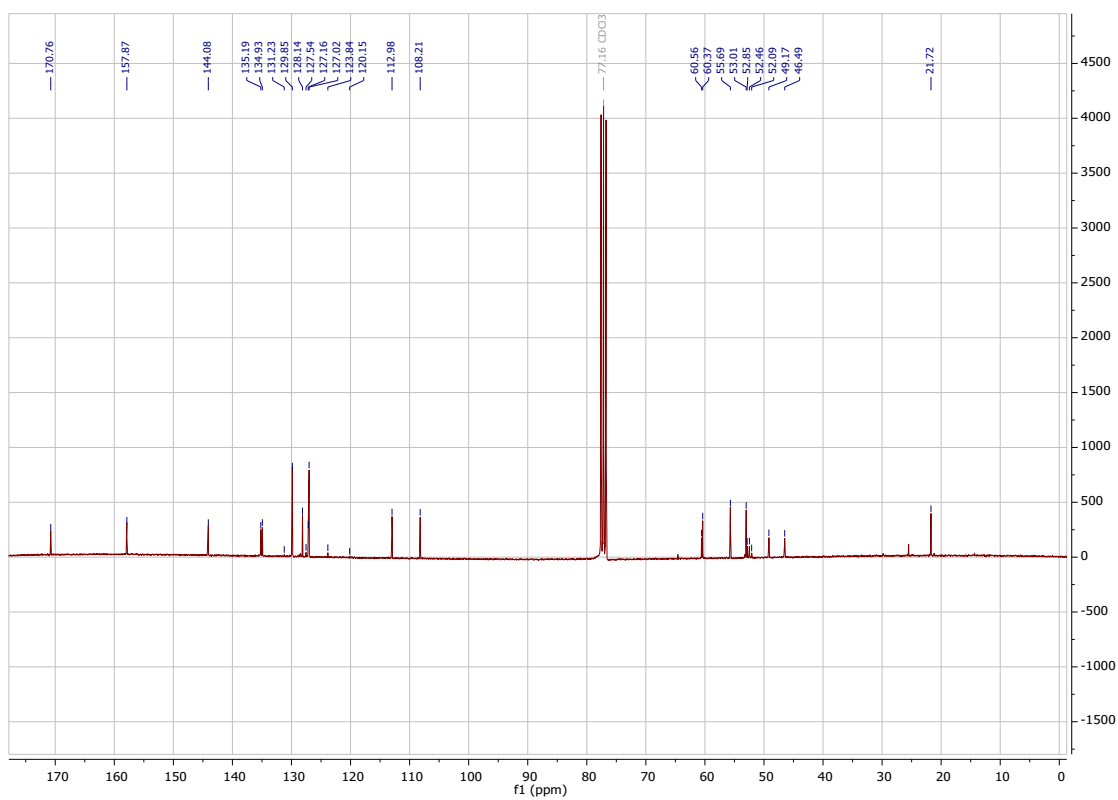



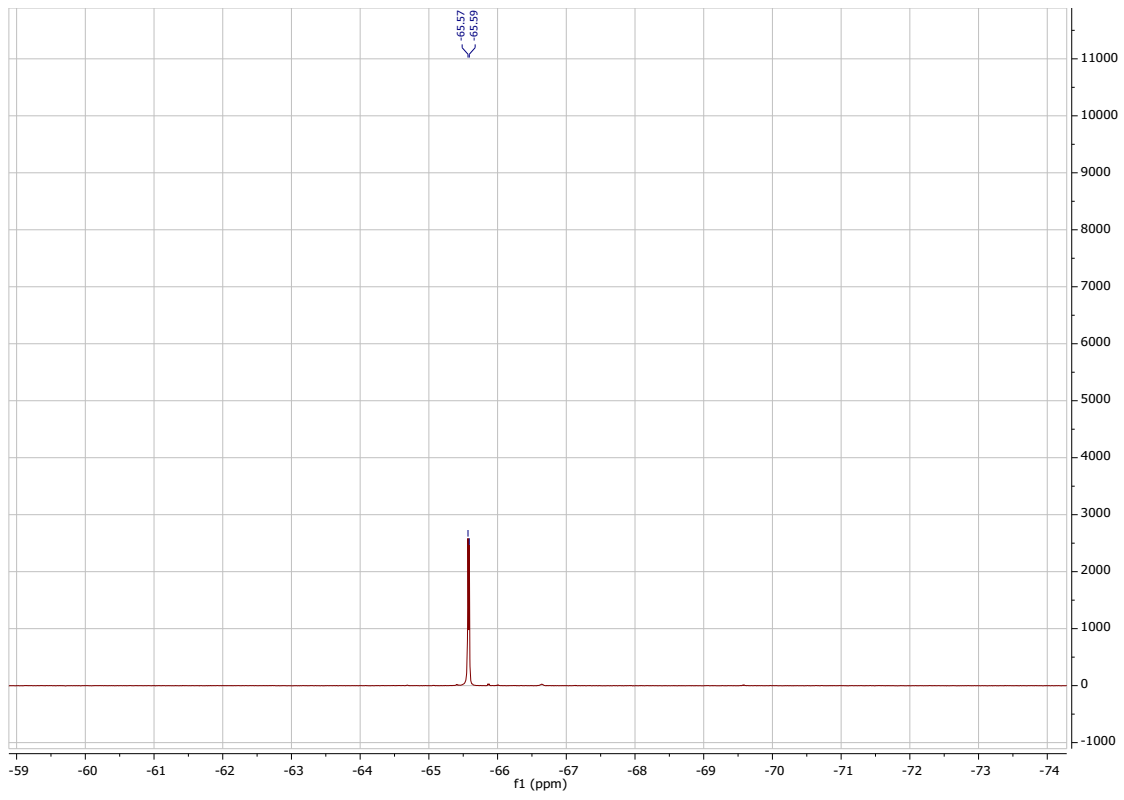

**Methyl (2S,3R,3aS,9bR)-8-chloro-5-tosyl-3-trifluoromethyl-2,3,3a,4,5,9b-hexahydro-1H-pyrrolo[3,2-c]quinoline-2-carboxylate (7d)**

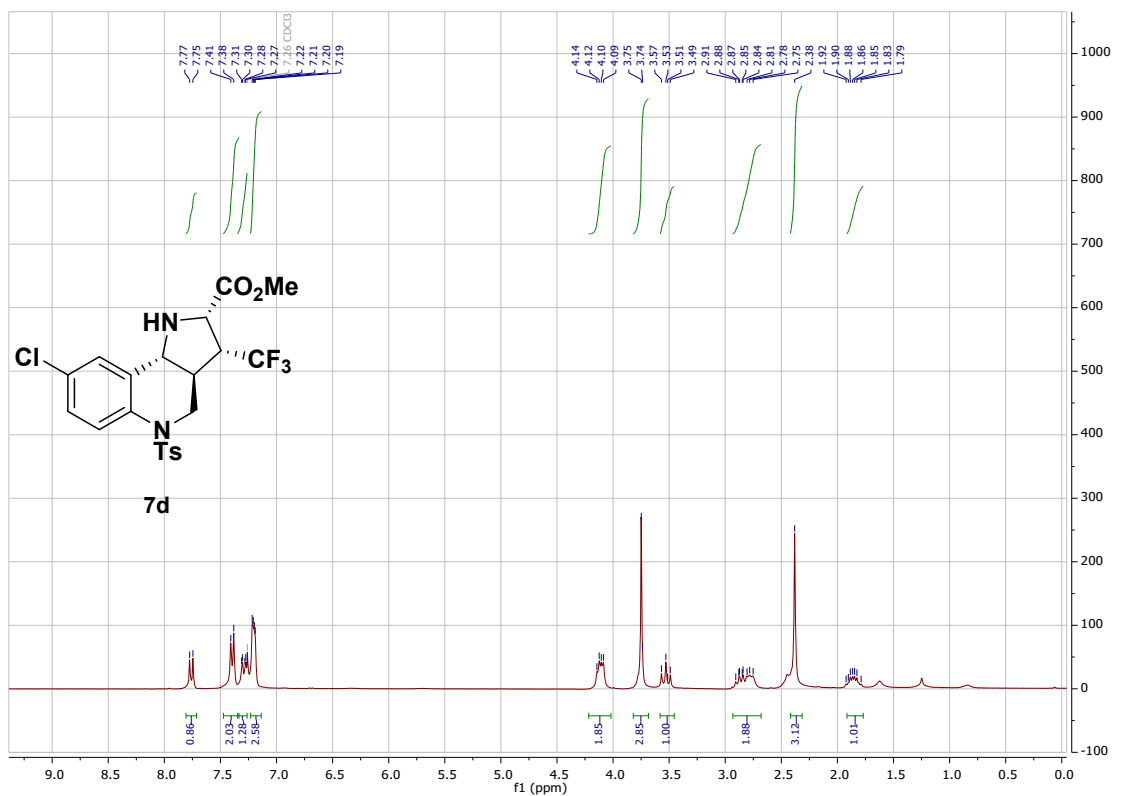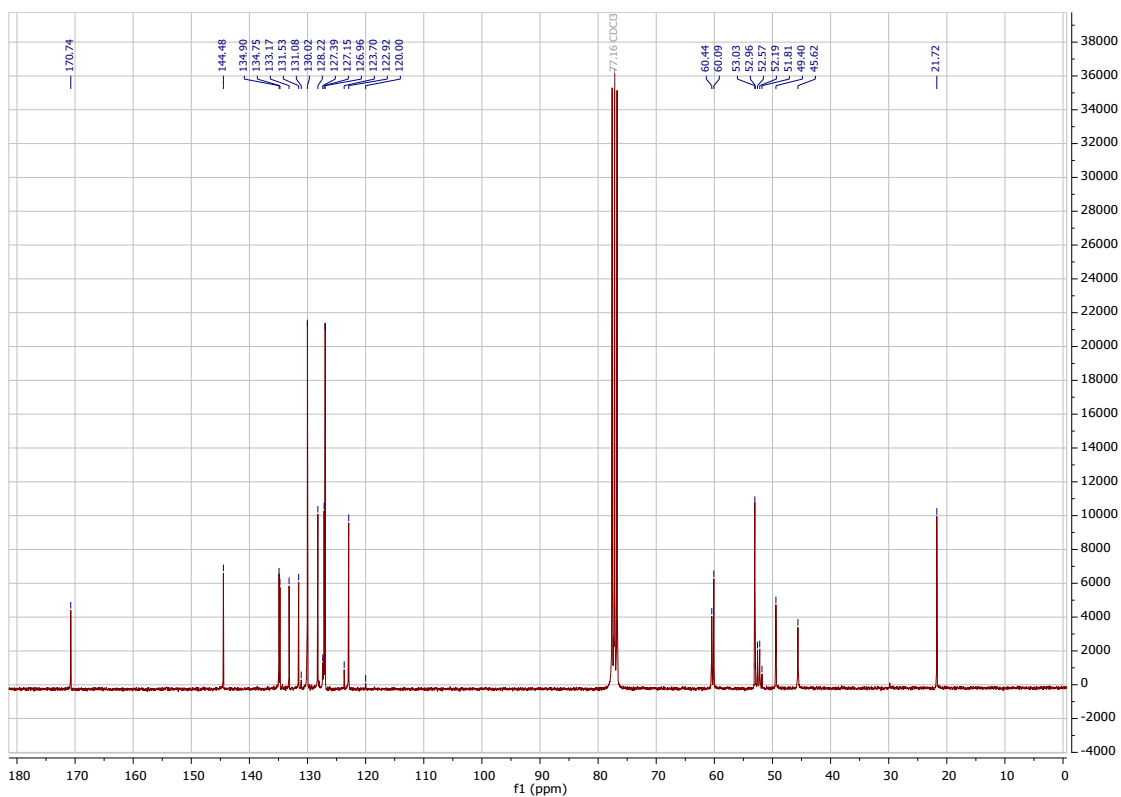

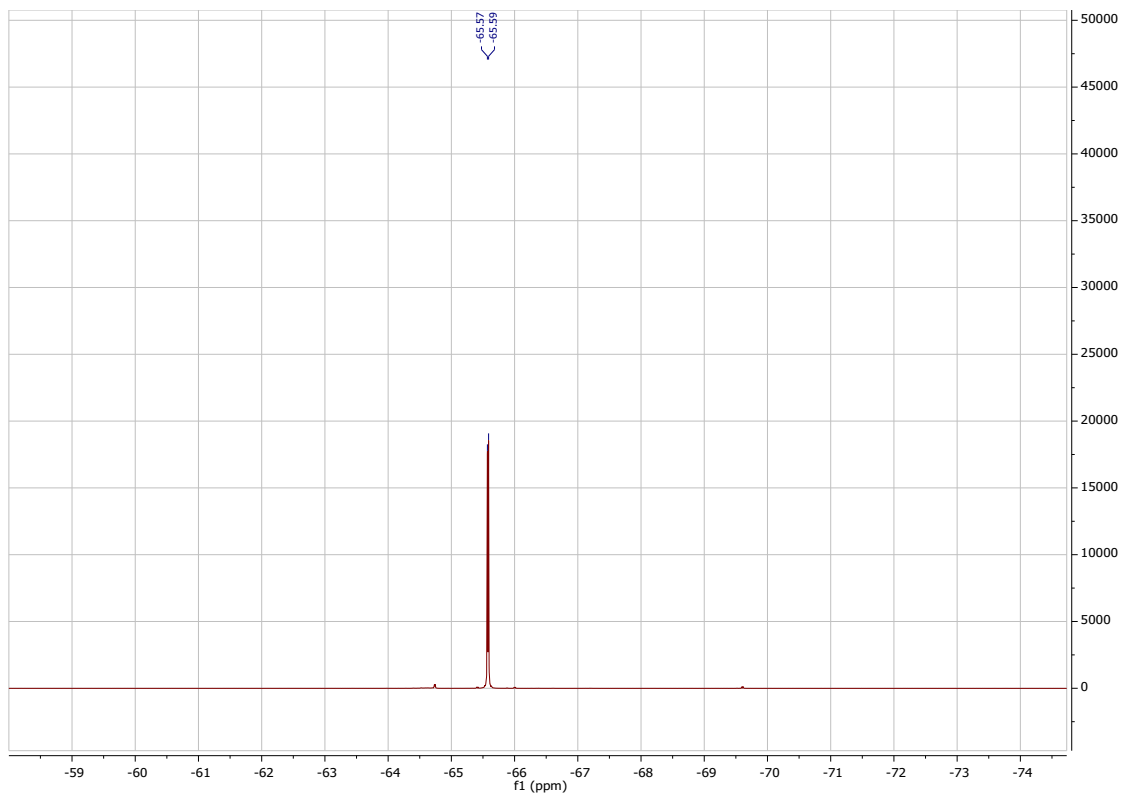

**Methyl (2*S*,3*R*,3*aS*,9*bR*)-3-difluoromethyl-5-tosyl-2,3,3*a*,4,5,9*b*-hexahydro-1*H*-pyrrolo[3,2-*c*]quinoline-2-carboxylate (7e)**

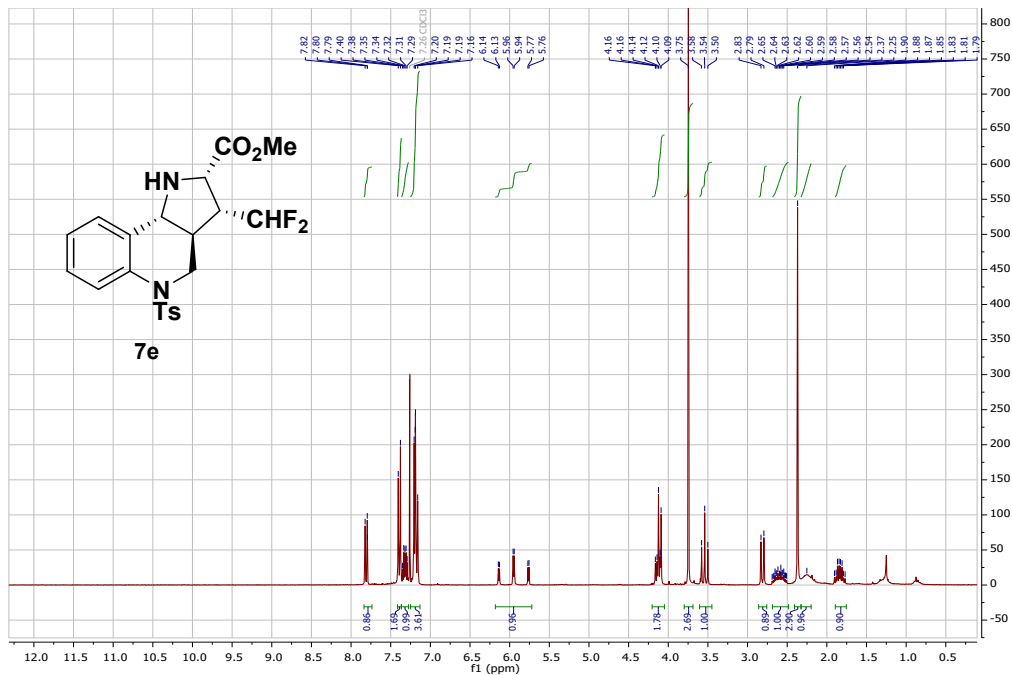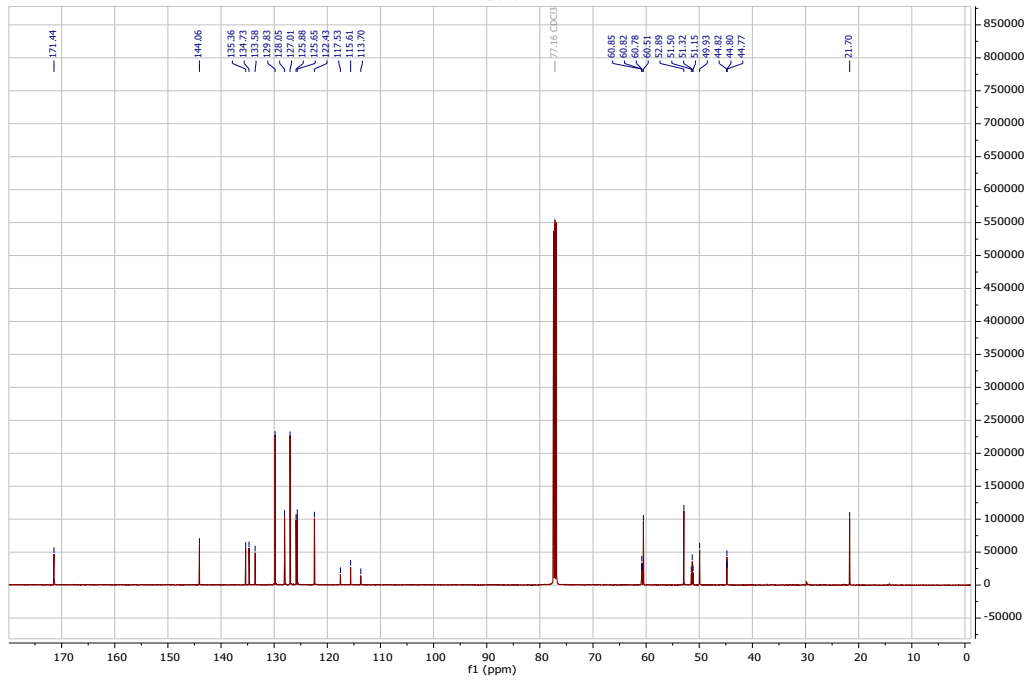

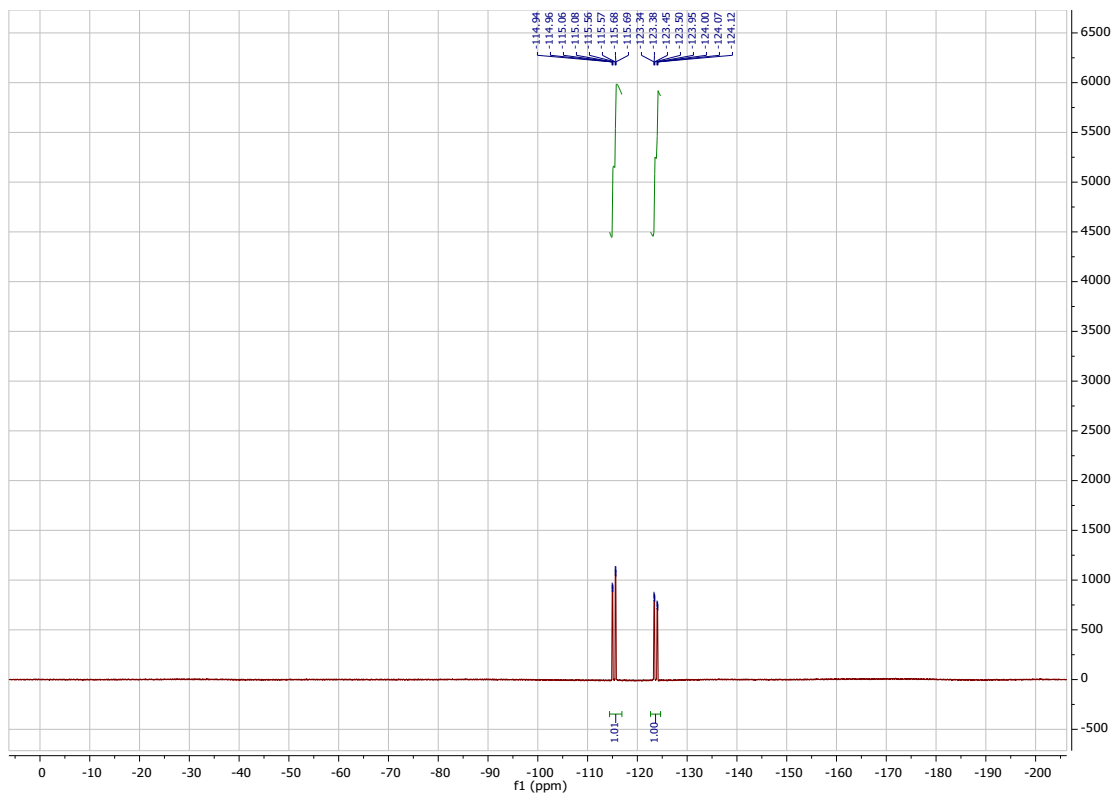

**Methyl (2*S*,3*R*,3*aS*,9*bR*)-3-perfluoroethyl-5-tosyl-2,3,3*a*,4,5,9*b*-hexahydro-1*H*-pyrrolo[3,2-*c*]quinoline-2-carboxylate (7f)**

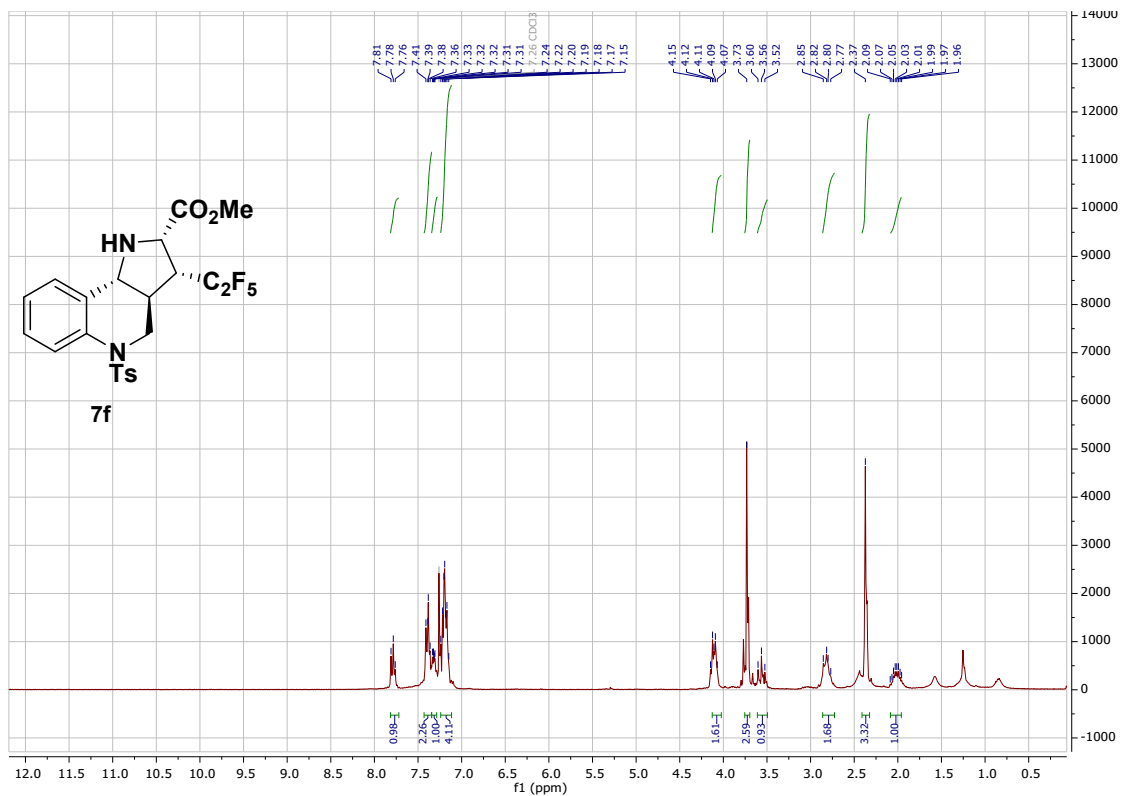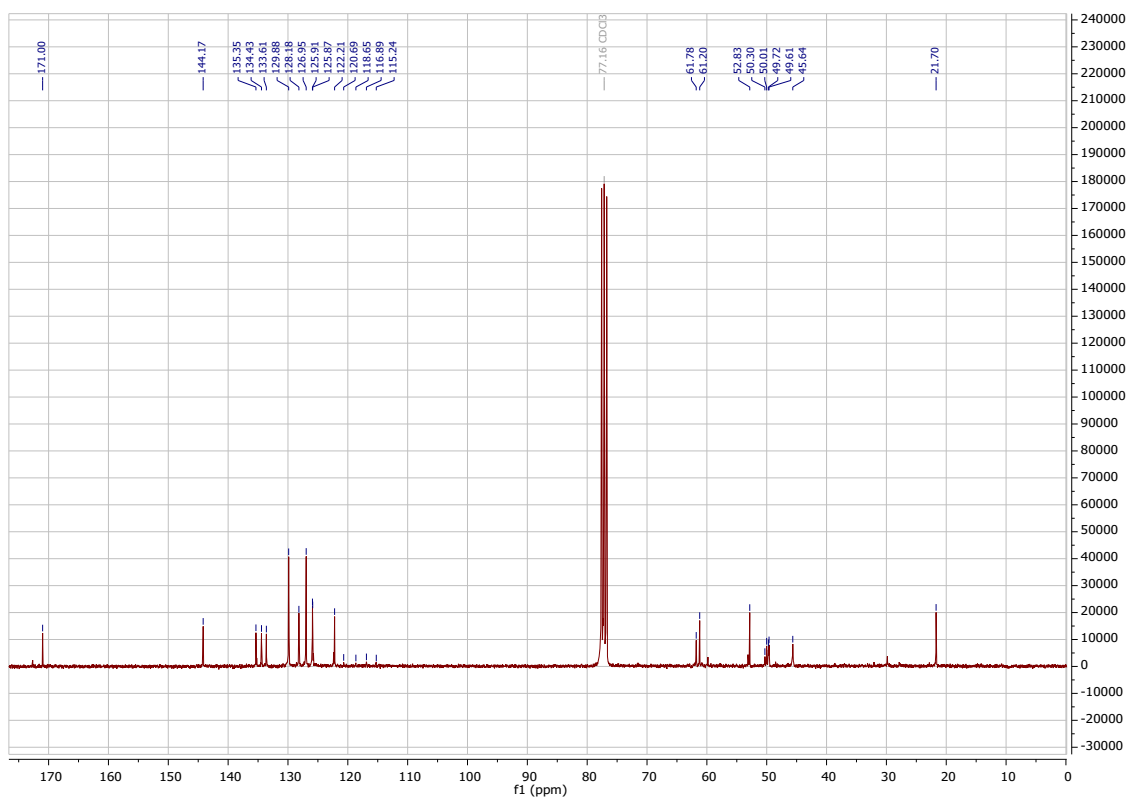

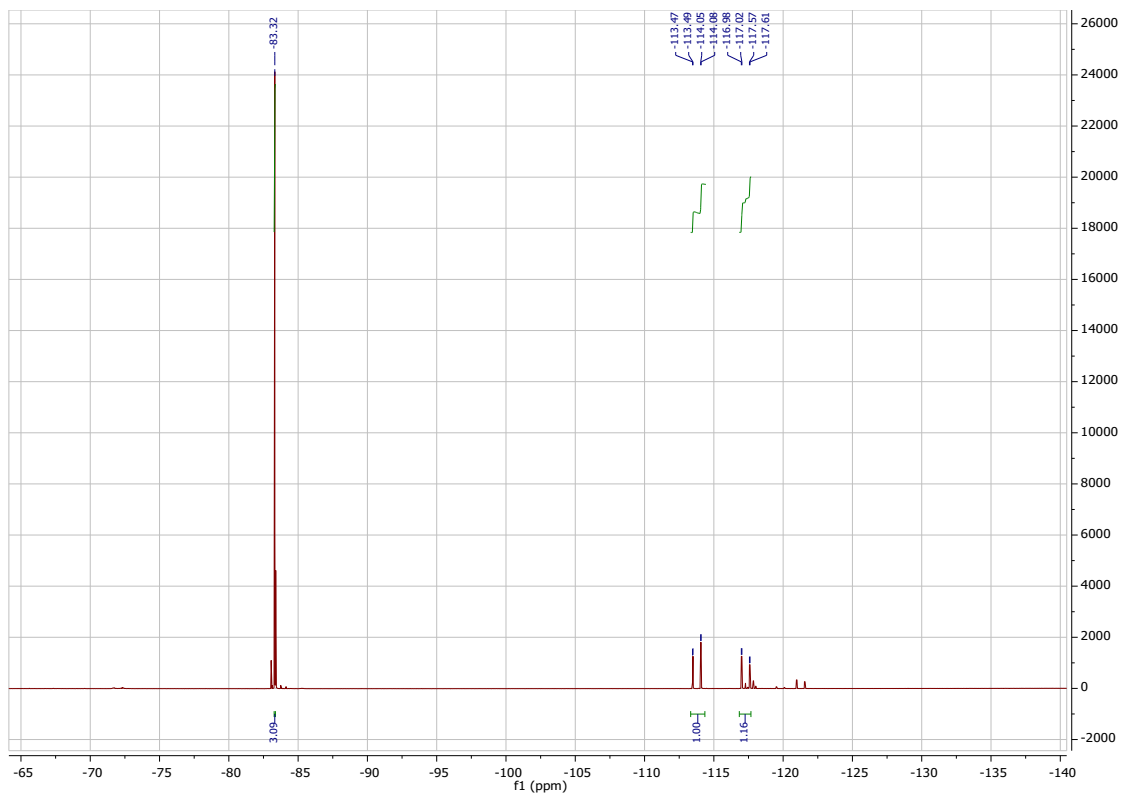

**Methyl (2*R*,3*S*,3*aR*,9*bS*)-3-phenyl-3-trifluoromethyl-1,2,3,3*a*,4,9*b*-hexahydrochromeno[4,3-*b*]pyrrole-2-carboxylate (11)**

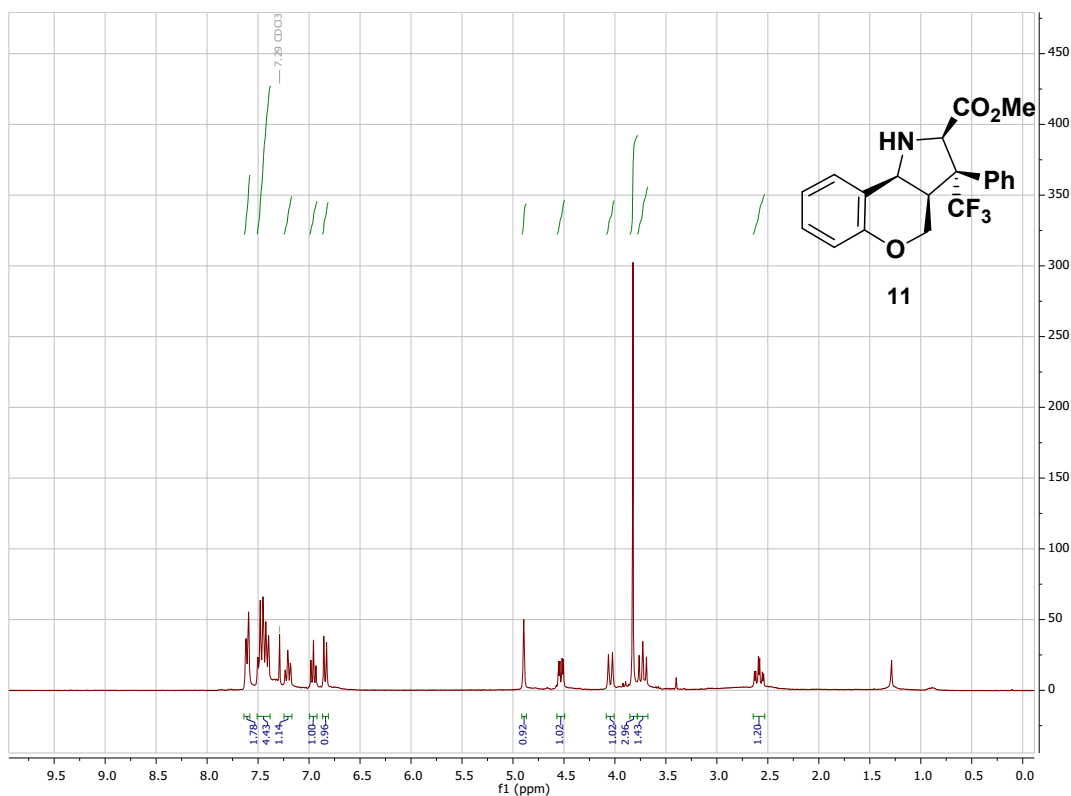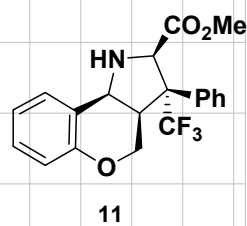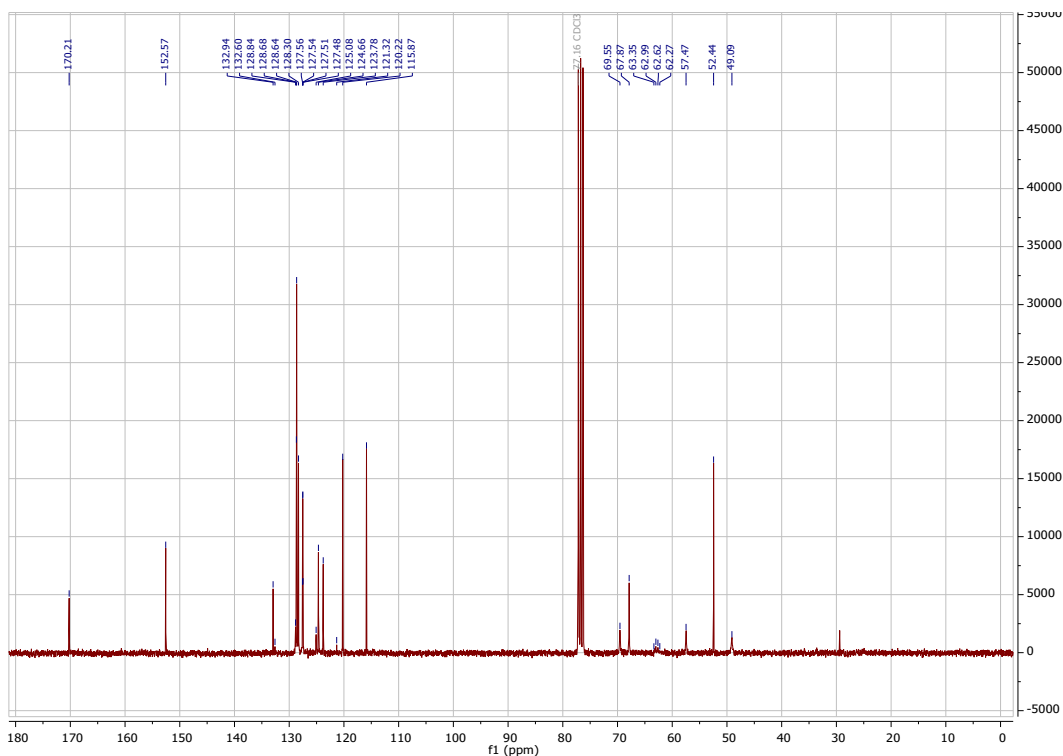



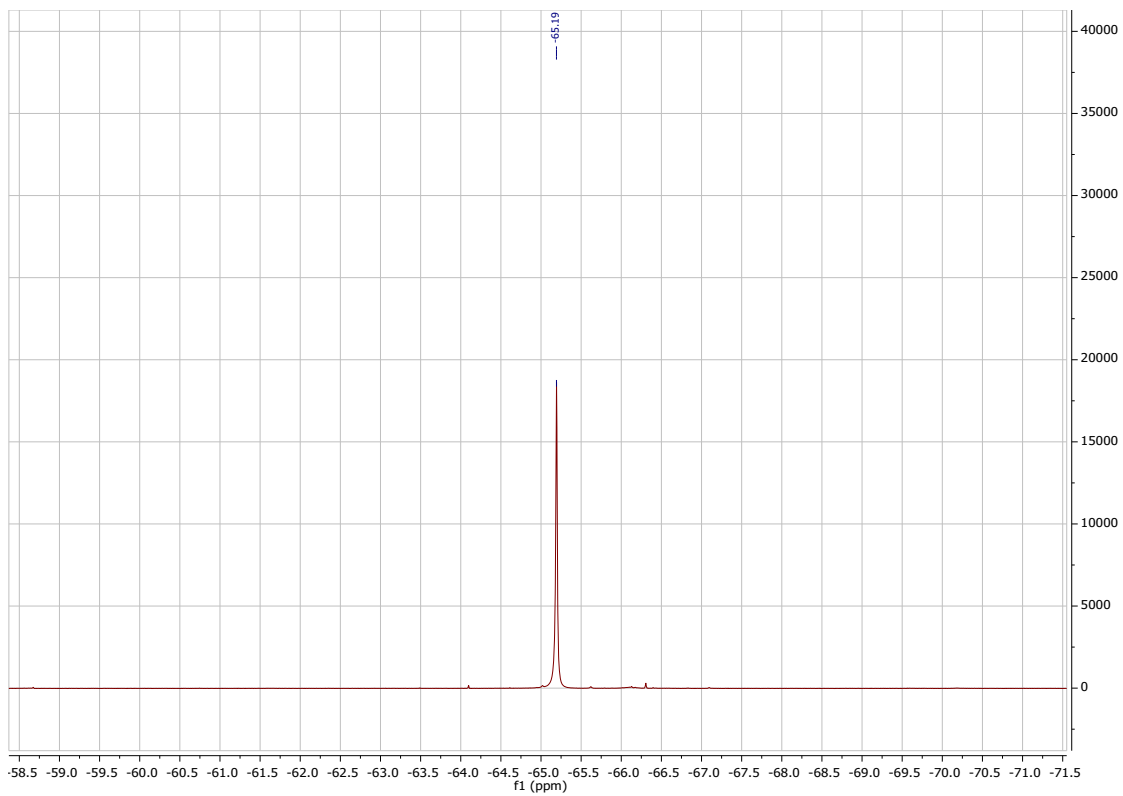

**Methyl (2R,3aS,9bR)-3a-trifluoromethyl-1,2,3,3a,4,9b-hexahydrochromeno[4,3-b]pyrrole-2-carboxylate (13)**

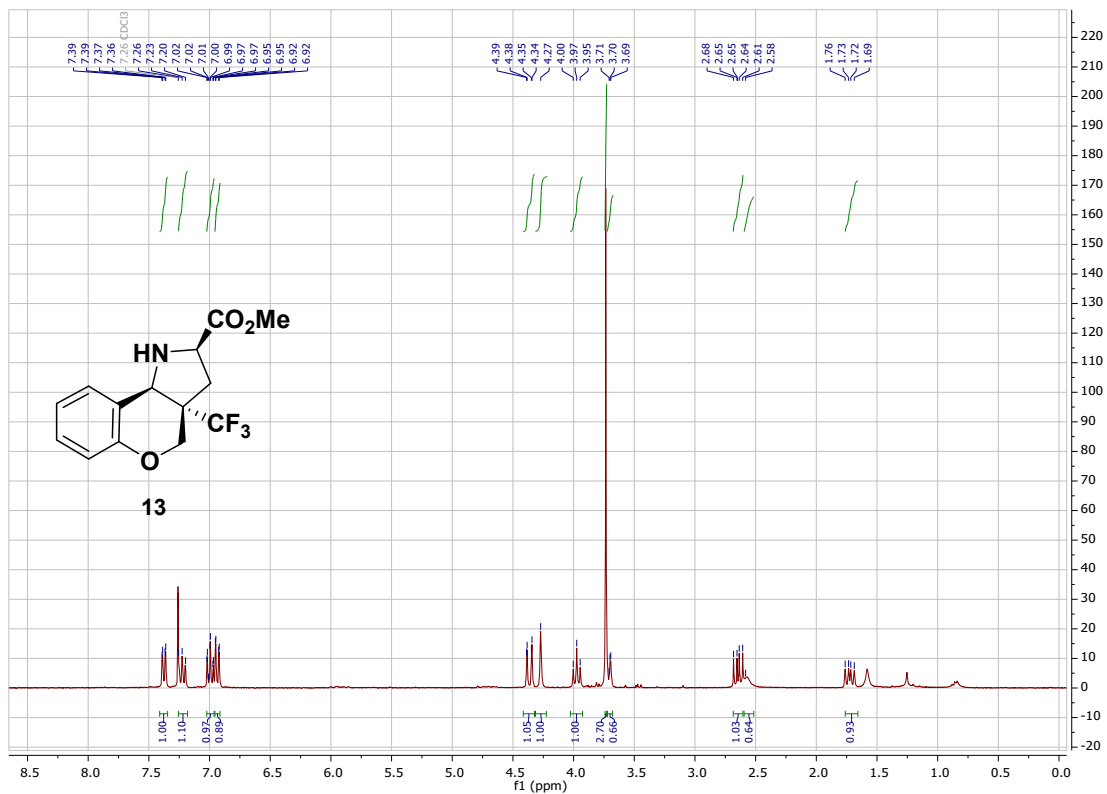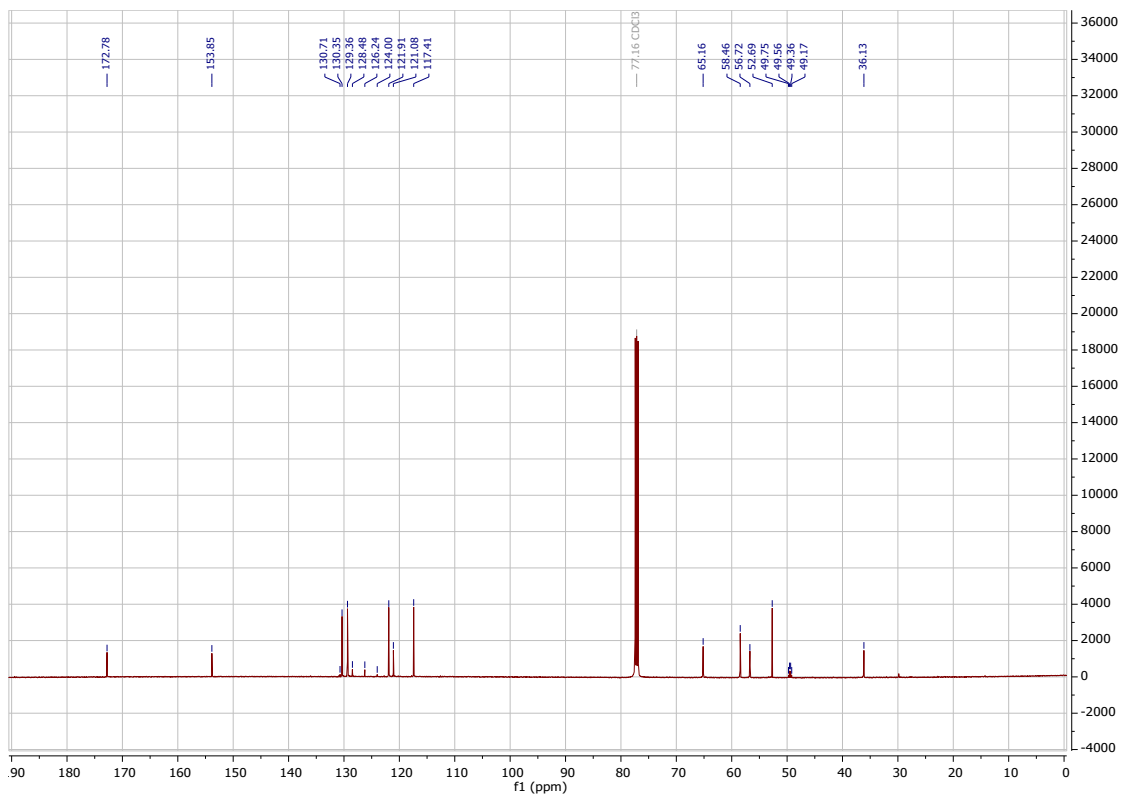

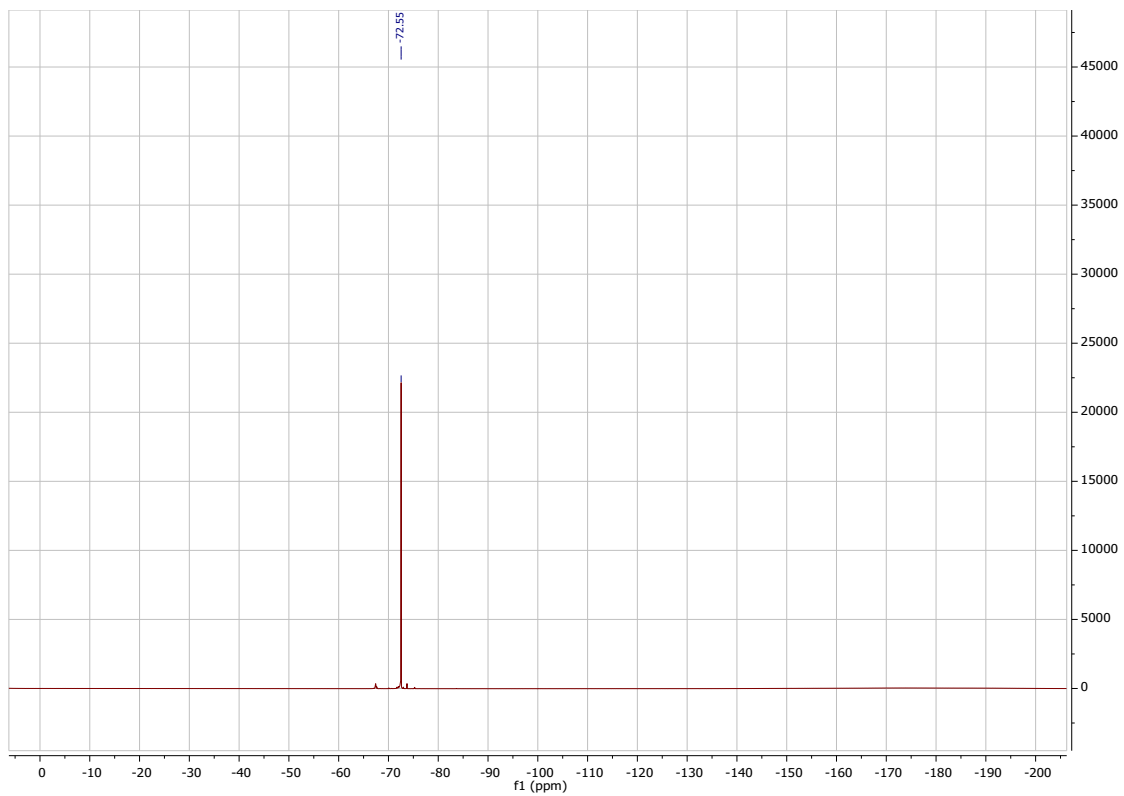

**(2*R*,3*R*,3*aR*,9*bS*)-2-(pyridin-2-yl)-3-trifluoromethyl-1,2,3,3*a*,4,9*b*-hexahydrochromeno[4,3-*b*]pyrrole (17)**

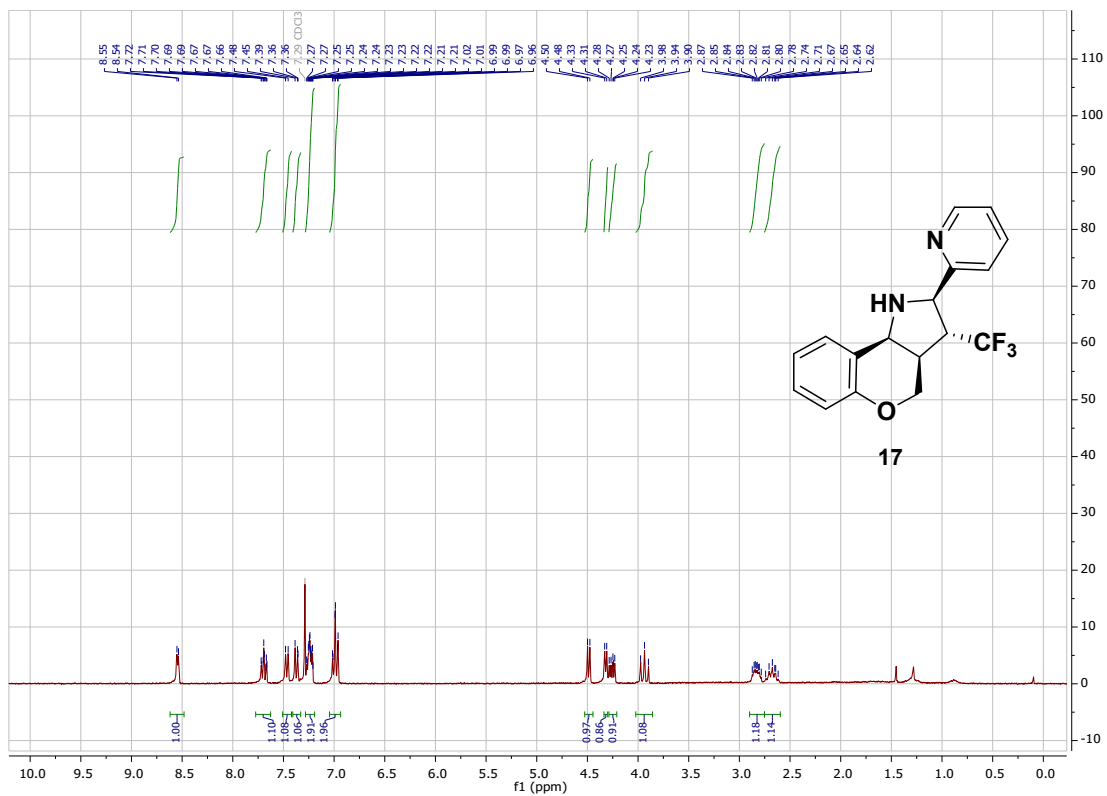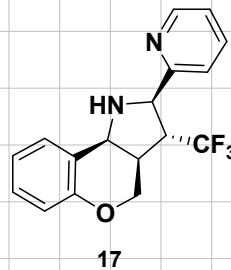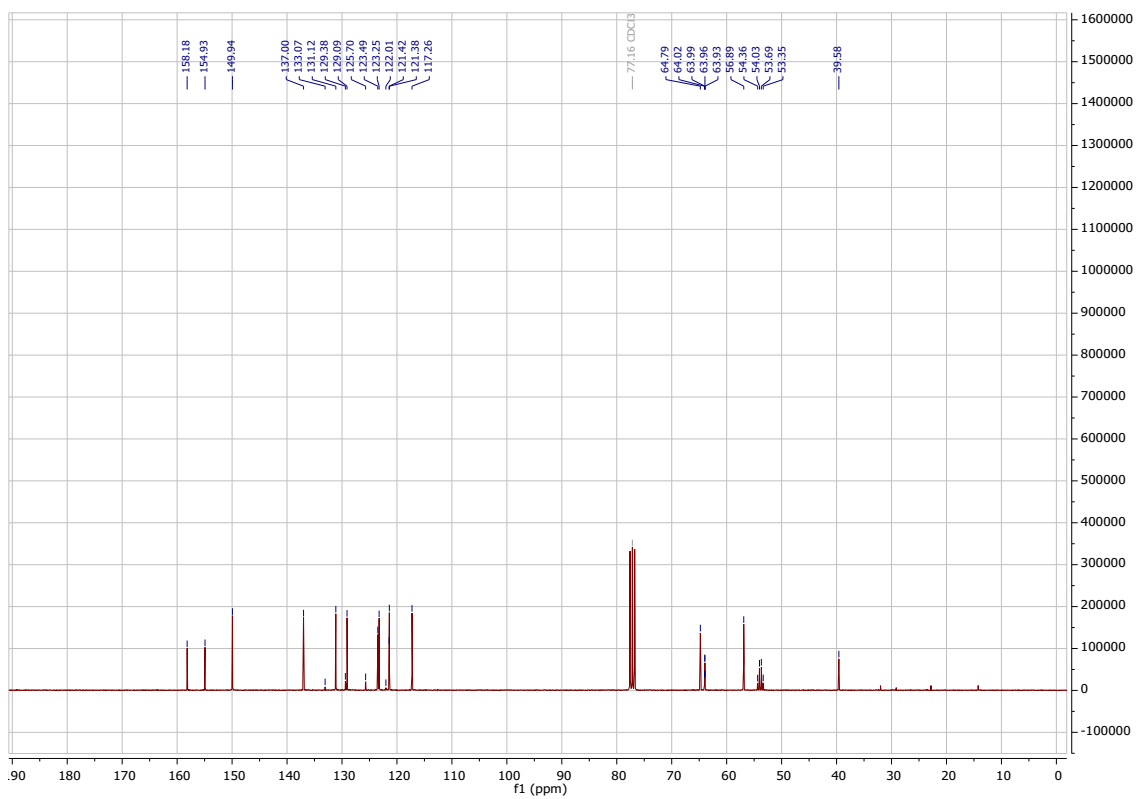

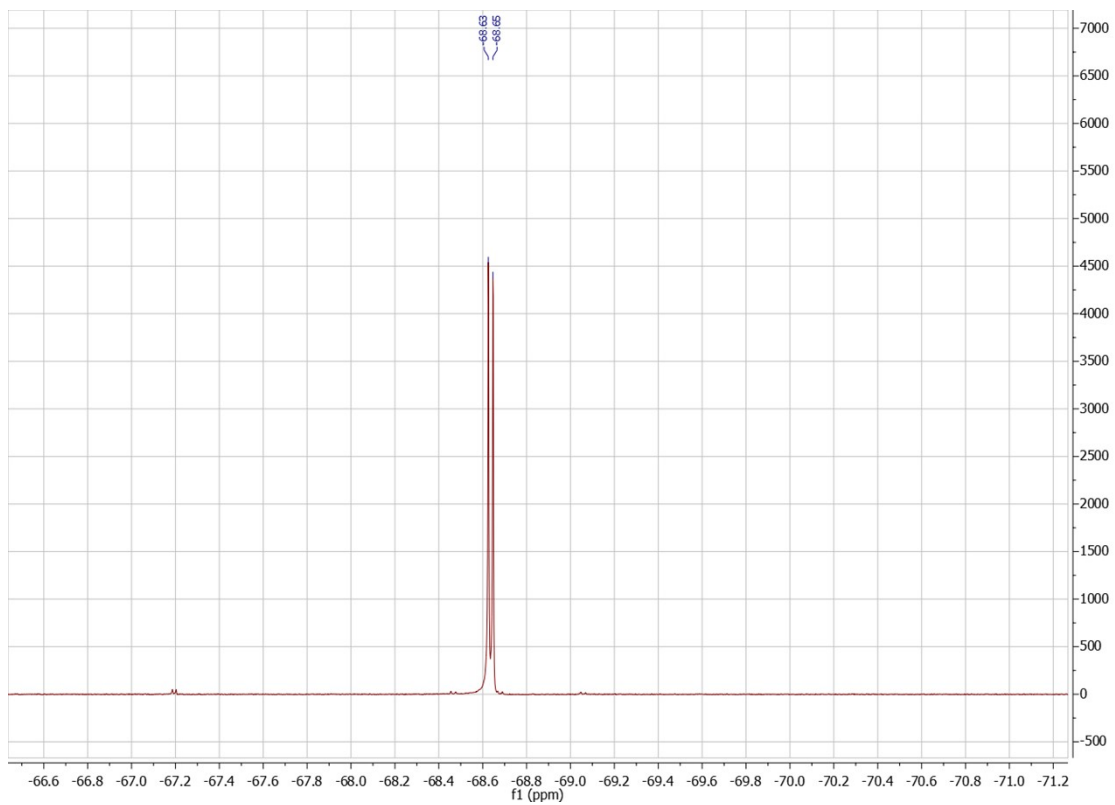

**(2*S*,3*R*,3*aS*,9*bR*)-2-(pyridin-2-yl)-5-tosyl-3-trifluoromethyl-2,3,3*a*,4,5,9*b*-hexahydro-1*H*-pyrrolo[3,2-*c*]quinoline**

**(19)**

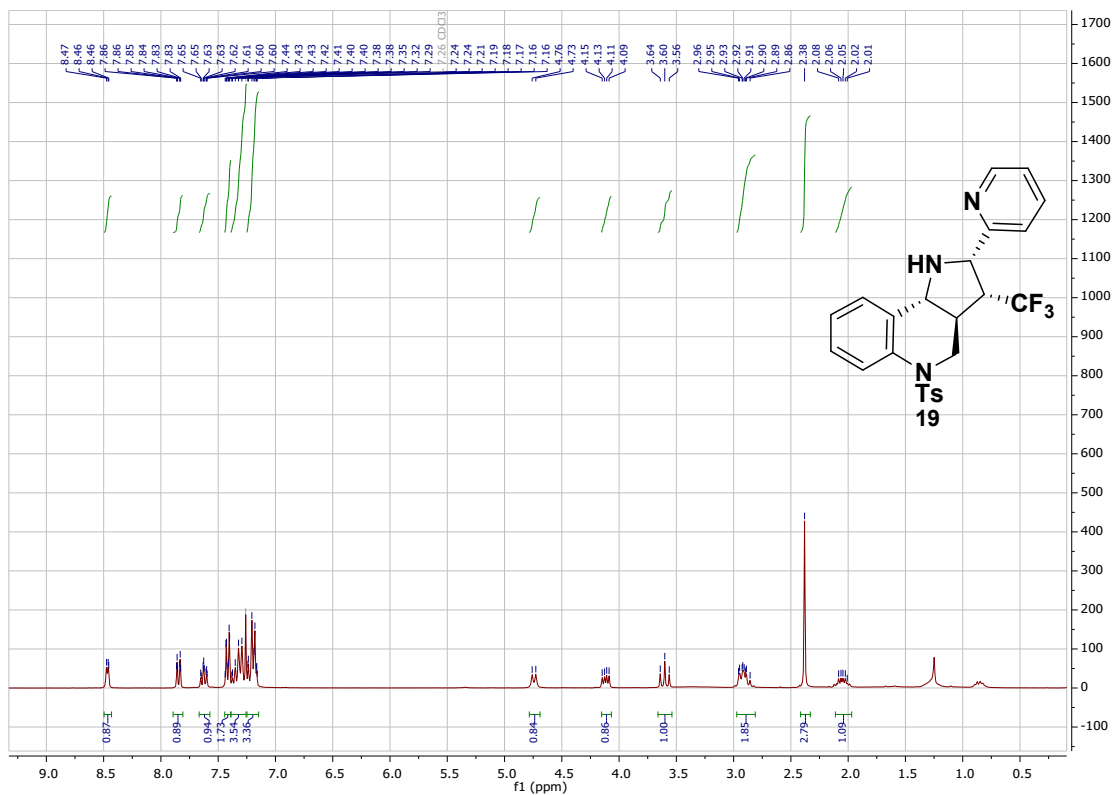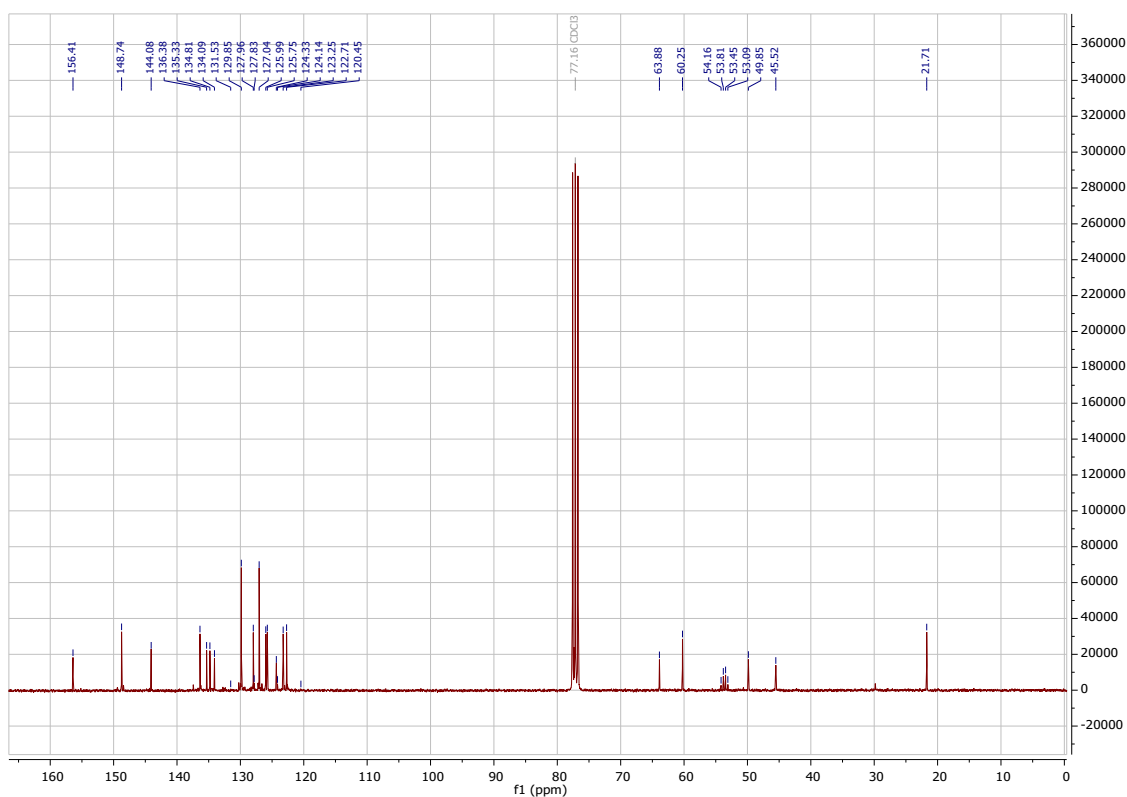

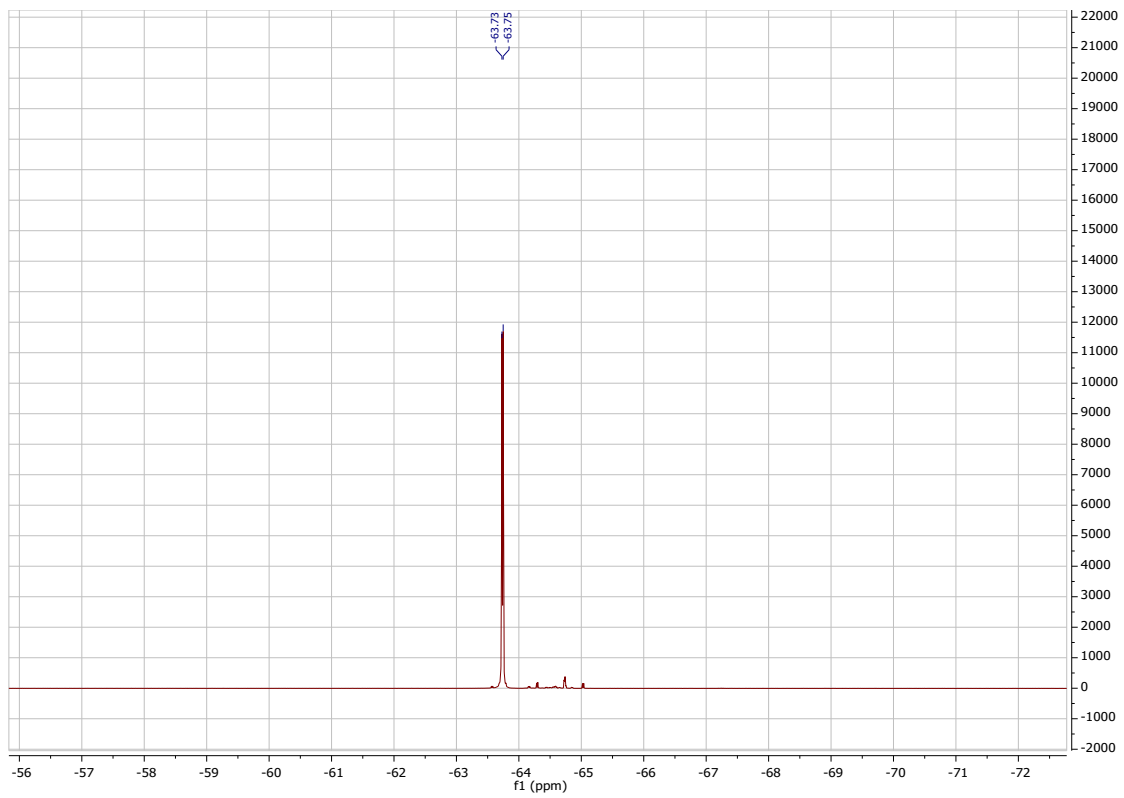

Supplement: d2cc02902b1.pdf [file d2cc02902b1.pdf]
